# Supplementary material
Source: PubMed Central journal article supplement (PMC3150889)

**SI Appendix for:**

**Supporting Information Corrected December 12, 2011**

**Clustered patterns of species origins of nature-derived drugs and clues  
for future bioprospecting**

**F. Zhu<sup>1,2</sup>, C. Qin<sup>2,3</sup>, L. Tao<sup>2,3</sup>, X. Liu<sup>2</sup>, Z. Shi<sup>2</sup>, X.H. Ma<sup>2</sup>, J. Jia<sup>2</sup>, Y. Tan<sup>2</sup>, C. Cui<sup>1</sup>, J.S. Lin<sup>1</sup>,  
C.Y. Tan<sup>1</sup>, Y.Y. Jiang<sup>1\*</sup>, and Y.Z. Chen<sup>1,2\*</sup>**

*<sup>1</sup>The Key Laboratory of Chemical Biology, Guangdong Province, Graduate School at Shenzhen,  
Tsinghua University, Shenzhen, Guangdong, P. R. China 518055*

*<sup>2</sup>Bioinformatics and Drug Design Group, Department of Pharmacy, and Center for  
Computational Science and Engineering, National University of Singapore, Singapore 117543*

*<sup>3</sup>NUS Graduate School for Integrative Sciences and Engineering, Singapore 117456*

\*Corresponding Authors: Y.Y. Jiang. Tel.: 86- 0755-26036017. Fax: 86- 0755-26036017. E-mail:

[Jiangyy@sz.tsinghua.edu.cn](mailto:Jiangyy@sz.tsinghua.edu.cn); Y.Z. Chen. Tel.: 65-6874-6877. Fax: 65-6774-6756. E-mail:

[phacyz@nus.edu.sg](mailto:phacyz@nus.edu.sg)

**SI Appendix Table S1** List of nature-derived new molecular entity drugs approved by FDA in 2009 and 2010

| <b>Drug name</b>    | <b>Year of FDA approval</b> | <b>Drug relationship to natural product</b> | <b>Species origin (family) of natural product</b> | <b>Therapeutic class</b>               | <b>Target and drug action</b>                       | <b>Exploration status of species family at time of drug approval</b>                          |
|---------------------|-----------------------------|---------------------------------------------|---------------------------------------------------|----------------------------------------|-----------------------------------------------------|-----------------------------------------------------------------------------------------------|
| Liraglutide         | 2010                        | Peptidomimetic of GLP-1 peptide             | Human (Hominidae)                                 | Anti-diabetes                          | Glucagon-like peptide 1 receptor agonist            | Existing drug-productive family with drugs approved before 1960 against oncological diseases  |
| Fingolimod          | 2010                        | Semi-synthetic derivative of myriocin       | Isaria sinclairii (Cordycipitaceae)               | Immuno-suppressive                     | Sphingosine-1-phosphate receptor S1PR1              | Non-drug-productive family inside existing drug-productive cluster formed in 1962             |
| Velaglucerase alfa  | 2010                        | Recombinant protein                         | Human (Hominidae)                                 | Gaucher disease                        | Recombinant human acid beta-glucosidase             | Existing drug-productive family with drugs approved before 1960 against oncological diseases  |
| Cabazitaxel         | 2010                        | Semi-synthetic derivative of taxol          | Taxus brevifolia (Taxaceae)                       | Anticancer                             | Microtubule stabilizer                              | Existing drug-productive family with drugs approved 1993 against oncological diseases         |
| Ceftaroline fosamil | 2010                        | Semi-synthetic derivative of cephalosporin  | Acremonium (Acremonium)                           | Antibiotic                             | Cell wall disruptor                                 | Existing drug-productive family with drugs approved 1964 against bacterial infections         |
| Tesamorelin         | 2010                        | Recombinant protein                         | Human (Hominidae)                                 | HIV lipodystrophy                      | Human GRF receptors                                 | Existing drug-productive family with drugs approved before 1960 against oncological diseases  |
| Dabigatran          | 2010                        | Peptidomimetic of fibrinogen sequence       | Human (Hominidae)                                 | Anticoagulant                          | Thrombin inhibitor                                  | Existing drug-productive family with drugs approved before 1960 against oncological diseases  |
| Pitavastatin        | 2009                        | Semi-synthetic derivative of mevastatin     | Penicillium citrinum (Trichocomaceae)             | Hyperlipidemia and mixed dyslipidaemia | 3-hydroxy-3-methyl-glutaryl-CoA reductase inhibitor | Existing drug-productive family with drugs approved before 1960 against bacterial infections. |
| Vigabatrin          | 2009                        | Semi-synthetic derivative of GABA           | Human (Hominidae)                                 | Spasms and seizures                    | GABA transaminase inhibitor                         | Existing drug-productive family with drugs approved before 1960 against oncological diseases  |
| Telavancin          | 2009                        | Semi-synthetic derivative of Vancomycin     | Amycolatopsis orientalis (Pseudonocardiaceae)     | Antibiotic                             | Cell wall disruptor                                 | Existing drug-productive family with drugs approved before 1960 against bacterial infections  |
| Romidepsin          | 2009                        | Natural product                             | Chromobacterium violaceum (Neisseriaceae)         | Anticancer                             | HDAC inhibitor                                      | Existing drug-productive family with drugs approved in 1981 against bacterial infections.     |
| Everolimus          | 2009                        | Semi-synthetic derivative of rapamycin      | Streptomyces hygroscopicus (Streptomycetaceae)    | Anticancer                             | mTOR inhibitor                                      | Existing drug-productive family with drugs approved before 1960 against bacterial infections  |

**SI Appendix Table S2** Drug productive scaffolds from the actinomycetales order

| <b>Scaffold</b>   | <b>Nature-Derived Drugs with the Scaffold</b>                                                                                                                                                                                                                                                                                                                                                                                                                                                                                                                                                                                                                  | <b>Scaffold Producing Species-Families in Actinomycetales Order</b> | <b>Scaffold Producing Species-Families outside Actinomycetales Order</b> |
|-------------------|----------------------------------------------------------------------------------------------------------------------------------------------------------------------------------------------------------------------------------------------------------------------------------------------------------------------------------------------------------------------------------------------------------------------------------------------------------------------------------------------------------------------------------------------------------------------------------------------------------------------------------------------------------------|---------------------------------------------------------------------|--------------------------------------------------------------------------|
| Actinomycins      | Dactinomycin                                                                                                                                                                                                                                                                                                                                                                                                                                                                                                                                                                                                                                                   | Streptomycetaceae                                                   | .                                                                        |
| Angucyclines      | Landomycin, Oviedomycin, Simocyclinone, Urdamycin, Jadomycin                                                                                                                                                                                                                                                                                                                                                                                                                                                                                                                                                                                                   | Streptomycetaceae                                                   | .                                                                        |
| Aminocoumarin     | Novobiocin                                                                                                                                                                                                                                                                                                                                                                                                                                                                                                                                                                                                                                                     | Streptomycetaceae                                                   | .                                                                        |
| Aminocyclitols    | Spectinomycin                                                                                                                                                                                                                                                                                                                                                                                                                                                                                                                                                                                                                                                  | Streptomycetaceae                                                   | .                                                                        |
| Aminoglycosides   | Arbekacin, Capreomycin, Gentamicin, Kanamycin, Neomycin, Netilmicin, Paromomycin, Streptomycin, Streptozocin, Tobramycin, Amikacin                                                                                                                                                                                                                                                                                                                                                                                                                                                                                                                             | Streptomycetaceae                                                   | .                                                                        |
| Amlodipine        | Atorvastatin                                                                                                                                                                                                                                                                                                                                                                                                                                                                                                                                                                                                                                                   | Pseudonocardiaceae                                                  | .                                                                        |
| Ansamycins        | Rifabutin, Rifamixin, Rifamycin B, Rifapentine, Rifaximin                                                                                                                                                                                                                                                                                                                                                                                                                                                                                                                                                                                                      | Micromonosporaceae, Nocardiaceae, Pseudonocardiaceae                | Celastraceae, Rhamnaceae                                                 |
| Anthracyclines    | Aclacinomycin, Aranciamycin, Amrubicin, Chartreusin, Chlortetracycline, Clomocycline, Daunorubicin, Demeclocycline, Doxorubicin, Doxycycline, Epirubicin, Idarubicin, Lymecycline, Methacycline, Minocycline, Pirarubicin, Tetracycline, Tigecycline, Valrubicin                                                                                                                                                                                                                                                                                                                                                                                               | Streptomycetaceae                                                   | .                                                                        |
| Aryl-C-glycosides | Gilvocarcin, Hedamycin, Medermycin                                                                                                                                                                                                                                                                                                                                                                                                                                                                                                                                                                                                                             | Streptomycetaceae                                                   | .                                                                        |
| Aureolic acids    | plicamycin, chromomycins, olivomycins, chromocyclomycin, UCH9, durhamycin A, Mitoxantrone, Mithramycin                                                                                                                                                                                                                                                                                                                                                                                                                                                                                                                                                         | Actinoplanaceae, Streptomycetaceae                                  | .                                                                        |
| Bleomycins        | Bleomycin, Tallysomycin, Zorbamycin                                                                                                                                                                                                                                                                                                                                                                                                                                                                                                                                                                                                                            | Pseudonocardiaceae, Streptomycetaceae                               | .                                                                        |
| Carbapenems       | Biapenem, Doripenem, Ertapenem, Imipenem, Meropenem, Panipenem                                                                                                                                                                                                                                                                                                                                                                                                                                                                                                                                                                                                 | Streptomycetaceae                                                   | .                                                                        |
| Cephalosporins    | Cefacetrile, Cefadroxil, Cephalexin, Cefaloglycin, Cefalonium, Cefaloridine, Cefalotin, Cefapirin, Cefatrizine, Cefazaflur, Cefazedone, Cefazolin, Cefradine, Cefroxadine, Ceftezole, Cefaclor, Cefonicid, Cefprozil, Cefuroxime, Cefuzonam, Cefmetazole, Cefotetan, Cefoxitin, Cefcapene, Cefdaloxime, Cefdinir, Cefditoren, Cefetamet, Cefixime, Cefmenoxime, Cefodizime, Cefotaxime, Cefovecin, Cefpimizole, Cefpodoxime, Cefteram, Ceftibuten, Ceftiofur, Ceftiolene, Ceftizoxime, Ceftriaxone, Cefoperazone, Ceftazidime, Cefclidine, Cefepime, Cefluprenam, Cefoselis, Cefozopran, Cefpirome, Cefquinome, Ceftobiprole, Ceftaroline, Flomoxef, latamoxef | Pseudonocardiaceae, Streptomycetaceae                               | Hypocreaceae                                                             |

|                              |                                                                                                                                                                                                                                                                  |                                                                                   |                                                            |
|------------------------------|------------------------------------------------------------------------------------------------------------------------------------------------------------------------------------------------------------------------------------------------------------------|-----------------------------------------------------------------------------------|------------------------------------------------------------|
| Enediynes                    | C-1027, Calicheamicin, Dynemicin, Maduropeptin, Neocarzinostatin                                                                                                                                                                                                 | Streptomycetaceae, Micromonosporaceae, Thermomonosporaceae                        | .                                                          |
| Indolocarbazoles             | AT2433, K-252a, Rebeccamycin, Staurosporine                                                                                                                                                                                                                      | Thermomonosporaceae, Streptosporangiaceae, Actinosynnemataceae, Streptomycetaceae | Arcyriaceae, Nostocaceae, Microchaetaceae, Fischerellaceae |
| Lincosamides                 | Clarithromycin, Clindamycin, Lincomycin                                                                                                                                                                                                                          | Pseudonocardiaceae, Streptomycetaceae                                             | .                                                          |
| Macrolactams                 | Ansamitocin, Geldanamycin, Leinamycin, Rapamycin, Vicenistatin, Pimecrolimus, Tacrolimus                                                                                                                                                                         | Actinosynnemataceae, Pseudonocardiaceae, Streptomycetaceae                        | .                                                          |
| Macrolides                   | Azithromycin, Borrelidin, Chalcomycin, Concanamycin, Dirithromycin, Flurithromycin, Josamycin, Natamycin, Pristinamycin, Dirithromycin, Erythromycin, Everolimus, Ivermectin, Rokitamycin, Roxithromycin, Sirolimus, Telithromycin, Temeirolimus, Troleandomycin | Pseudonocardiaceae, Streptomycetaceae                                             | Thorectidae, Nudibranch, Aplysiidae, Phymatellidae         |
| Pentangular polyphenols      | Benastatin, Fredericamycin, Griseorhodin                                                                                                                                                                                                                         | Streptomycetaceae                                                                 | .                                                          |
| polyenes                     | Nystatin, Amphotericin, Candicidin                                                                                                                                                                                                                               | Streptomycetaceae                                                                 | Asteraceae                                                 |
| Polyenones                   | Neocarzilin A, Monensin, Nigericin, Nonactin                                                                                                                                                                                                                     | Streptomycetaceae                                                                 | .                                                          |
| Polyketide-Isoprenoid hybrid | Furanonaphthoquinone I, Furaquinocin A                                                                                                                                                                                                                           | Streptomycetaceae                                                                 | .                                                          |
| Spirotetronates              | Chlorothricin, Kijanamicin, Tetrocarcin A                                                                                                                                                                                                                        | Streptomycetaceae, Thermomonosporaceae, Micromonosporaceae                        | Phyllidiidae                                               |
| Streptogramins               | Griseoviridin, Madumycin, Pristinamycin, Quinupristin, Virginiamycin                                                                                                                                                                                             | Micromonosporaceae, Nocardiaceae, Streptomycetaceae                               | .                                                          |
| Tetracenomycins              | Elloramycin, Lactonamycin, Tetracenomycin C                                                                                                                                                                                                                      | Streptomycetaceae                                                                 | .                                                          |
| Tetracyclines                | Tetracycline, Oxytetracycline, doxycycline, minocycline                                                                                                                                                                                                          | Streptomycetaceae                                                                 | .                                                          |

SI Appendix Table S3 The scaffold groups of 52 nAChR ligands and the species-family of their species origins

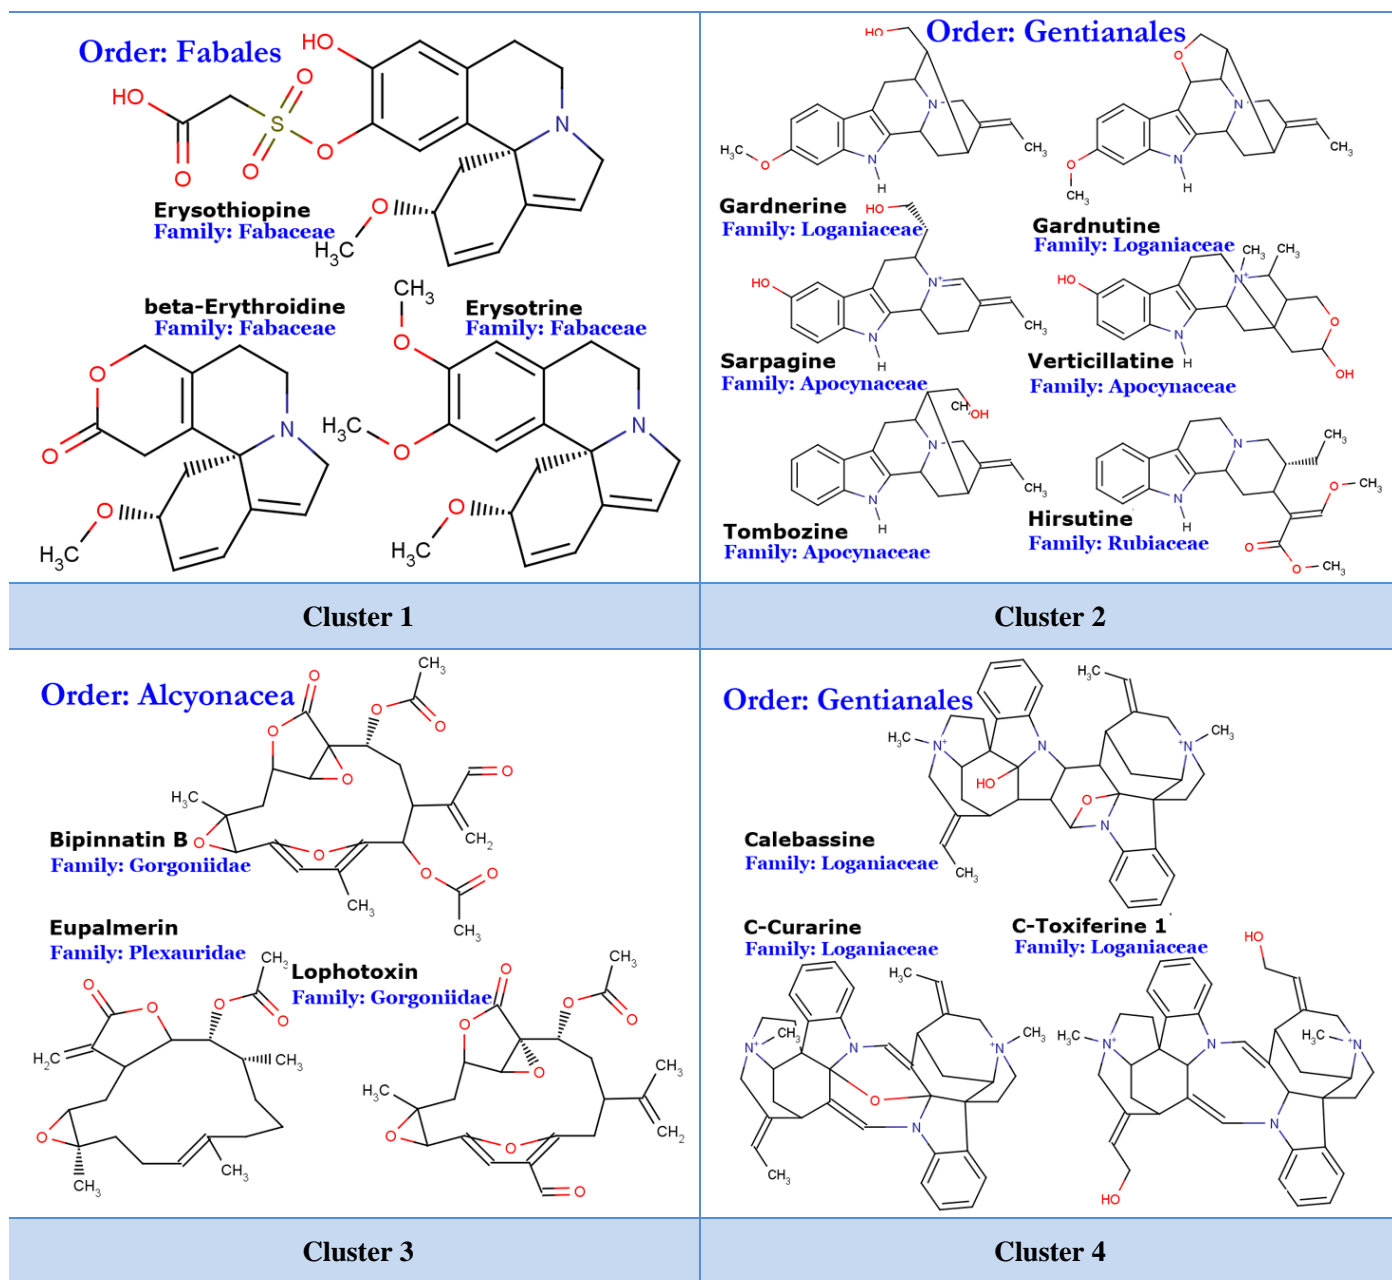

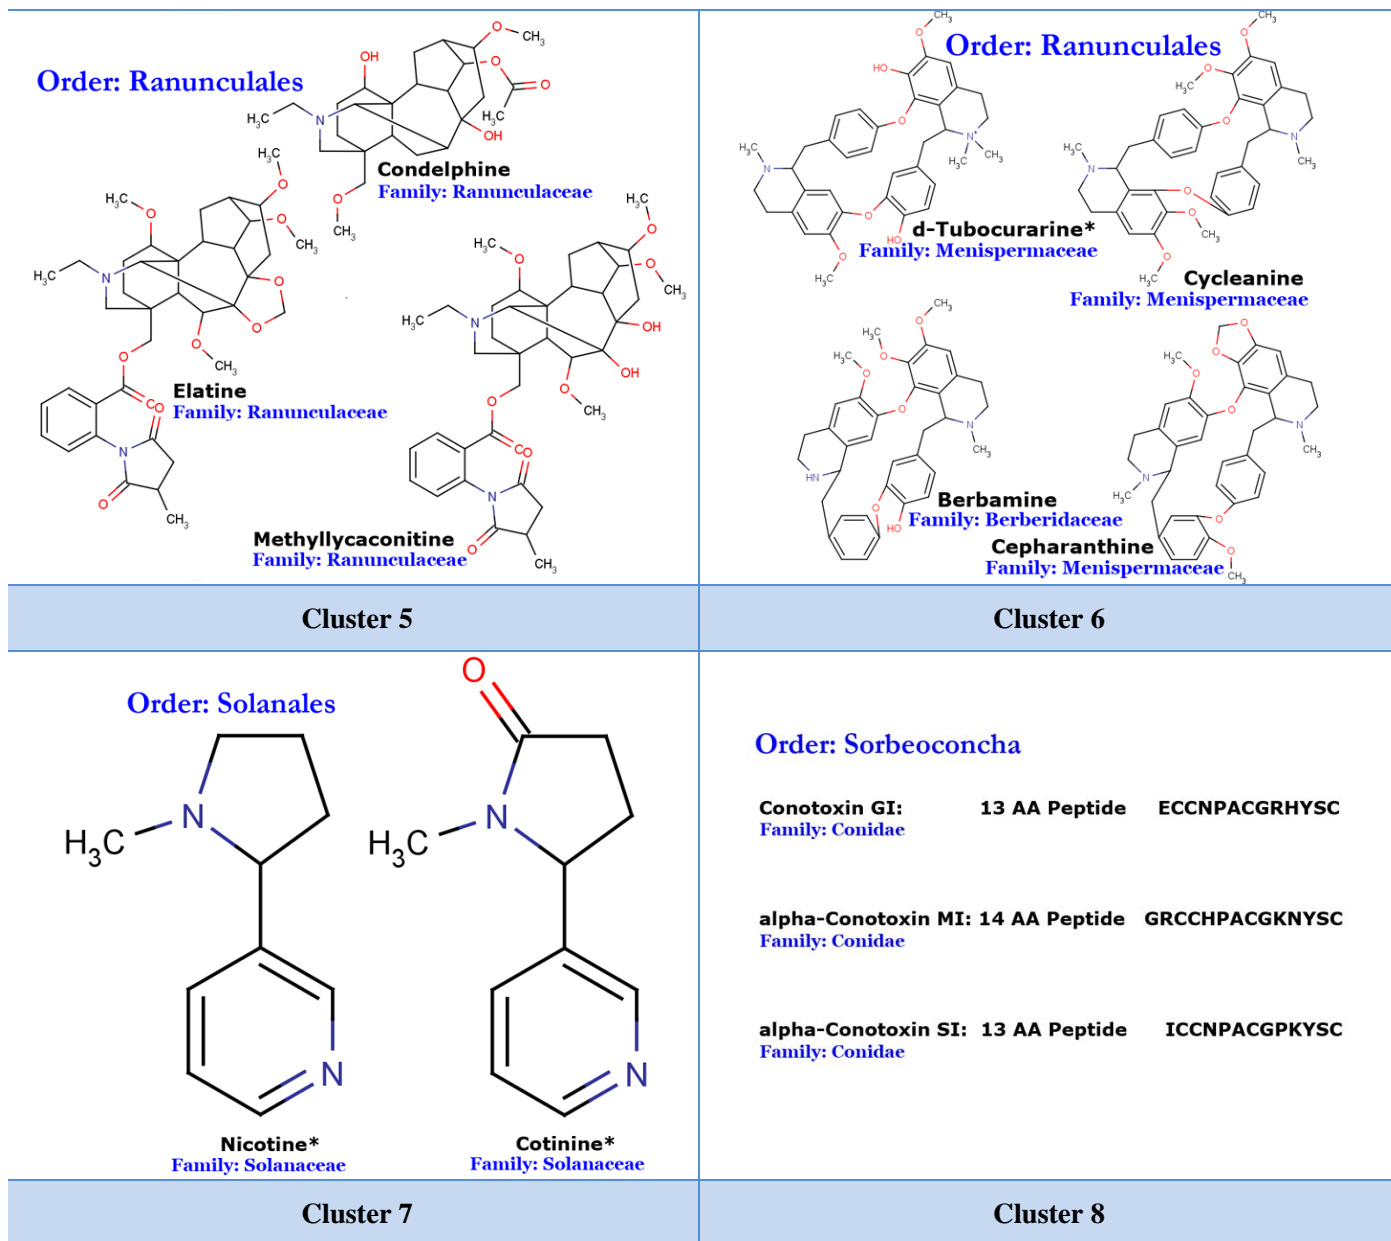

|                                                                                                                                                                                                                                                            |                                                                                                                                                                                                                                                             |
|------------------------------------------------------------------------------------------------------------------------------------------------------------------------------------------------------------------------------------------------------------|-------------------------------------------------------------------------------------------------------------------------------------------------------------------------------------------------------------------------------------------------------------|
| <p><b>Order: Squamata</b></p> 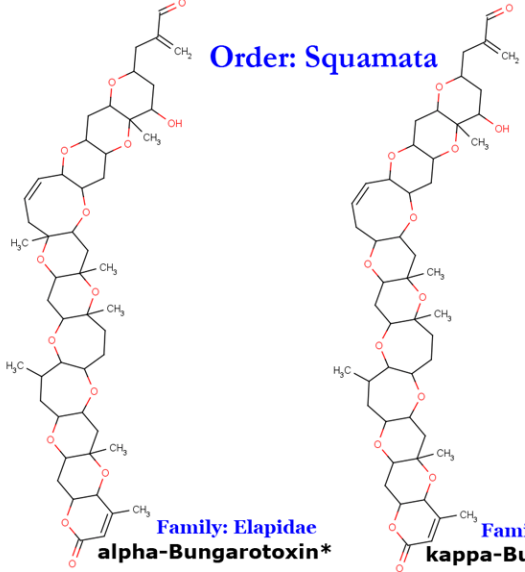 <p><b>Family: Elapidae</b><br/><b>alpha-Bungarotoxin*</b></p> <p><b>Family: Elapidae</b><br/><b>kappa-Bungarotoxin</b></p>                 | <p><b>Order: Caryophyllales &amp; Monostilifera</b></p>  <p><b>Anabasine</b><br/><b>Family: Amaranthaceae</b></p> <p><b>Anabaseine</b><br/><b>Genus: Paranemertes</b></p> |
| <b>Cluster 9</b>                                                                                                                                                                                                                                           | <b>Cluster 10</b>                                                                                                                                                                                                                                           |
| <p><b>Order: Nostocales &amp; Oscillatoriales</b></p>  <p><b>Anatoxin-A</b><br/><b>Family: Nostocaceae</b></p> <p><b>Homoanatoxin</b><br/><b>Genus: Oscillatoria</b></p> | <p><b>Order: Primates &amp; Rosales</b></p>  <p><b>Acetylcholine*</b> <b>Family: Hominidae</b></p> <p><b>Neurine</b><br/><b>Family: Cannabaceae</b></p>                  |
| <b>Cluster 11</b>                                                                                                                                                                                                                                          | <b>Cluster 12</b>                                                                                                                                                                                                                                           |

## Order: Araneae

**Agelenin:** 35 AA Peptide

Family: Agelenidae

GGCLPHNRFNCNALSGPRCCSGLKCKELSIWDSRCL-NH2

Disulfide bonds Cys3- Cys19, Cys10- Cys24,

and Cys18- Cys34

## Order: Squamata

**alpha-Cobrotoxin:** 62 AA Peptide

Family: Elapidae

LECHNQQSSQTPTTTGC

SGGETNCYKKRWRDHRG

YRTERGCGCPSVKNGIE

INCCTDRCNN

### Cluster 13

## Order: Sorbeoconcha

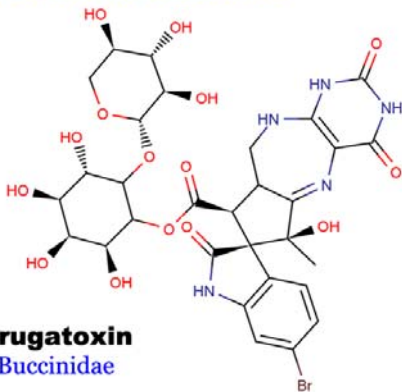

### Cluster 14

## Order: Sorbeoconcha

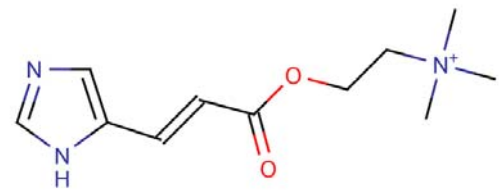

### Cluster 15

## Order: Gentianales

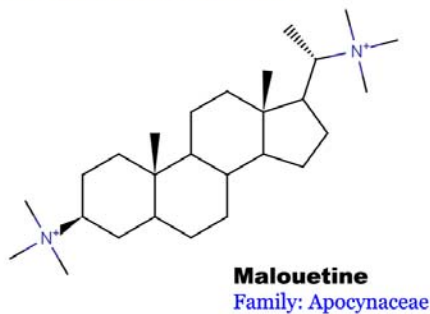

### Cluster 16

## Order: Magnoliales

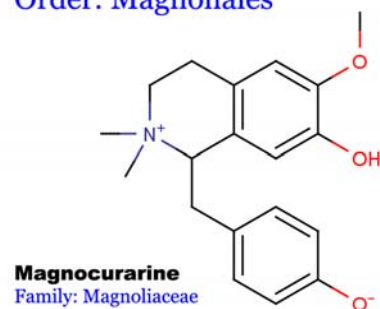

### Cluster 17

### Cluster 18



Order: Asterales

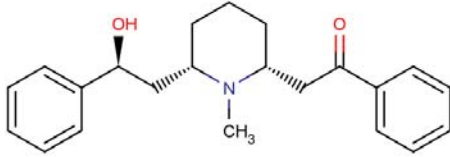

**Lobeline**  
Family: Campanulaceae

Order: Anura

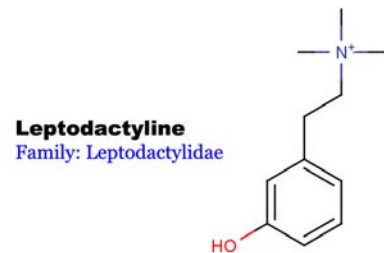

**Leptodactyline**  
Family: Leptodactylidae

Cluster 19

Cluster 20

Order: Caryophyllales

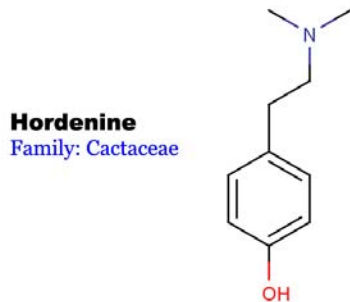

**Hordenine**  
Family: Cactaceae

Subclass: Asterids

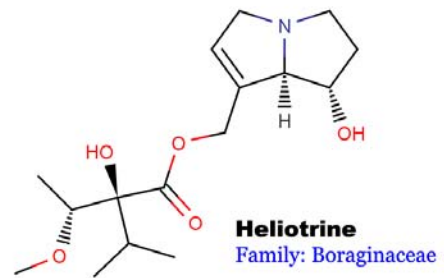

**Heliotrine**  
Family: Boraginaceae

Cluster 21

Cluster 22

Order: Anura

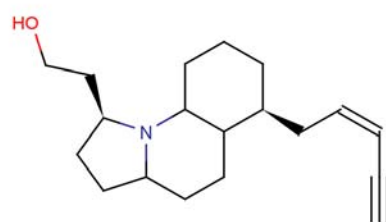

**Gephyrotoxin**  
Family: Dendrobatidae

Order: Anura

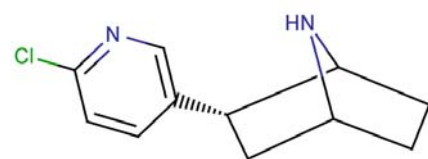

**Epibatidine**  
Family: Dendrobatidae

Cluster 23

Cluster 24

Order: Fabales

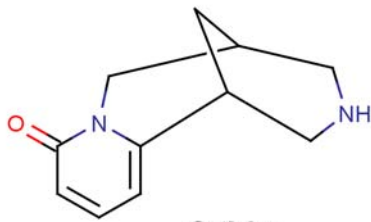

**Cytisine**  
Family: Fabaceae

Cluster 25

Order: Caryophyllales

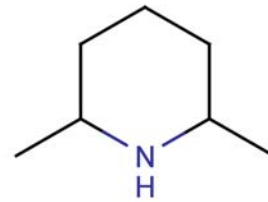

**2,6-Dimethylpiperidine**  
Family: Amaranthaceae

Cluster 26

Order: Solanales

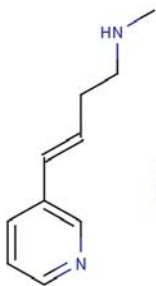

**Metanicotine**  
Family: Solanaceae

Cluster 27

Order: Ranunculales

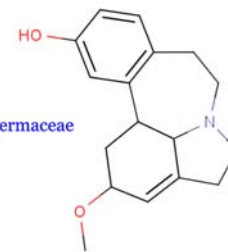

**Cocculine**  
Family: Menispermaceae

Cluster 28

Order: Ranunculales

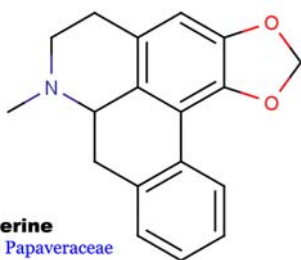

**Roemerine**  
Family: Papaveraceae

Cluster 29

**SI Appendix Table S4** FDA approved anticancer kinase inhibitors derived or mimicked from natural products. The exploration status of species family of natural product leads is represented by one of the labels ED existing drug-productive family, NDin non-drug-productive families inside existing drug-productive clusters, and NDout non-drug-productive families outside existing drug-productive cluster, which is followed by the year of earliest previous drug approval and the previous drug's therapeutic class.

| <b>Kinase Inhibitor (target)</b> | <b>Relationship to Natural Product Lead</b>                                            | <b>Year of FDA Approval</b> | <b>Species Origin of Natural Product (species family and its exploration status at time of drug approval)</b>                                                                                                | <b>Scaffold</b>         | <b>Scaffold Producing Species-Families in Actinomycetales Order</b>               | <b>Scaffold Producing Species-Families in Other Orders</b> |
|----------------------------------|----------------------------------------------------------------------------------------|-----------------------------|--------------------------------------------------------------------------------------------------------------------------------------------------------------------------------------------------------------|-------------------------|-----------------------------------------------------------------------------------|------------------------------------------------------------|
| Sirolimus (mTOR)                 | An actinomycetes metabolite                                                            | 1999                        | Streptomyces hygroscopicus (Streptomycetaceae, ED, before 1960, anti-infections)                                                                                                                             | Macrolactams            | Actinosynnemataceae, Pseudonocardaceae, Streptomycetaceae                         |                                                            |
| Imatinib mesilate (Abl)          | A molecule chemically modified from staurosporin                                       | 2001                        | Lentzea albida (Actinosynnemataceae, ED, 1971, anti-infections)                                                                                                                                              | Indolocarbazoles        | Thermomonosporaceae, Streptosporangiaceae, Actinosynnemataceae, Streptomycetaceae | Arcyriaceae, Nostocaceae, Microchaetaceae, Fischerellaceae |
| Gefitinib (EGFR)                 | ATP-binding site mimic of Zeatin and Olomoucine, a semi-synthetic derivative of Zeatin | 2002                        | Maize (Poaceae 1984, cardiovascular), Cocos nucifera (Arecaceae, ED, 1978, anthelmintic), Spinacia oleracea (Amaranthaceae, NDout), Pisum sativum (Fabaceae, ED, before 1960, cardiovascular)                | Adenine-type Cytokinins | .                                                                                 | Poaceae, Arecaceae, Amaranthaceae, Fabaceae                |
| Erlotinib hydrochloride (EGFR)   | ATP-binding site mimic of Zeatin and Olomoucine, a semi-synthetic derivative of Zeatin | 2004                        | Maize (Poaceae 1984, cardiovascular), Cocos nucifera (Arecaceae, ED, 1978, anthelmintic), Spinacia oleracea (Amaranthaceae, ED, 2002, anticancer), Pisum sativum (Fabaceae, ED, before 1960, cardiovascular) | Adenine-type Cytokinins | .                                                                                 | Poaceae, Arecaceae, Amaranthaceae, Fabaceae                |
| Sunitinib malate (VEGFR)         | ATP-binding site mimic of Zeatin and Olomoucine, a semi-synthetic derivative of Zeatin | 2006                        | Maize (Poaceae 1984, cardiovascular), Cocos nucifera (Arecaceae, ED, 1978, anthelmintic), Spinacia oleracea (Amaranthaceae, ED, 2002, anticancer), Pisum sativum (Fabaceae, ED, before 1960, cardiovascular) | Adenine-type Cytokinins | .                                                                                 | Poaceae, Arecaceae, Amaranthaceae, Fabaceae                |

|                         |                                                                                        |      |                                                                                                                                                                                                              |                         |                                                                                   |                                                            |
|-------------------------|----------------------------------------------------------------------------------------|------|--------------------------------------------------------------------------------------------------------------------------------------------------------------------------------------------------------------|-------------------------|-----------------------------------------------------------------------------------|------------------------------------------------------------|
| Temsirolimus (mTOR)     | A semi-synthetic derivative of Rapamycin (sirolimus)                                   | 2007 | Streptomyces hygroscopicus (Streptomycetaceae, ED, before 1960, anti-infections)                                                                                                                             | Macrolactams            | Actinosynnemataceae, Pseudonocardiaaceae, Streptomycetaceae                       |                                                            |
| Nilotinib (Abl)         | A molecule chemically modified from staurosporin                                       | 2007 | Lentzea albida (Actinosynnemataceae, ED, 1971, anti-infections)                                                                                                                                              | Indolocarbazoles        | Thermomonosporaceae, Streptosporangiaceae, Actinosynnemataceae, Streptomycetaceae | Arcyriaceae, Nostocaceae, Microchaetaceae, Fischerellaceae |
| Lapatinib (EGFR / HER2) | ATP-binding site mimic of Zeatin and Olomoucine, a semi-synthetic derivative of Zeatin | 2007 | Maize (Poaceae 1984, cardiovascular), Cocos nucifera (Arecaceae, ED, 1978, anthelmintic), Spinacia oleracea (Amaranthaceae, ED, 2002, anticancer), Pisum sativum (Fabaceae, ED, before 1960, cardiovascular) | Adenine-type Cytokinins | .                                                                                 | Poaceae, Arecaceae, Amaranthaceae, Fabaceae                |
| Pazopanib (VEGFR)       | ATP-binding site mimic of Zeatin and Olomoucine, a semi-synthetic derivative of Zeatin | 2009 | Maize (Poaceae 1984, cardiovascular), Cocos nucifera (Arecaceae, ED, 1978, anthelmintic), Spinacia oleracea (Amaranthaceae, ED, 2002, anticancer), Pisum sativum (Fabaceae, ED, before 1960, cardiovascular) | Adenine-type Cytokinins | .                                                                                 | Poaceae, Arecaceae, Amaranthaceae, Fabaceae                |
| Everolimus (mTOR)       | A semi-synthetic derivative of Rapamycin (sirolimus)                                   | 2009 | Streptomyces hygroscopicus (Streptomycetaceae, ED, before 1960, anti-infections)                                                                                                                             | Macrolactams            | Actinosynnemataceae, Pseudonocardiaaceae, Streptomycetaceae                       |                                                            |

**SI Appendix Table S5** List of FDA approved nature-derived drugs and their species origins. Following the seminal works of Newman and Cragg (J Nat Prod. 2007 Mar;70(3):461-77), the drug types are defined as follows: “B” Biological, a peptide or protein either isolated from an organism/cell line or produced by biotechnological means in a surrogate host; “N” Natural product; “ND” Derived from a natural product and is usually a semisynthetic modification; “NM” Natural product mimic; “S\*” Made by total synthesis based on the pharmacophore from a natural product; and “V” Vaccine.

| Drug name                        | Drug type | Species origin (family)                                                                                     | Therapeutic class or targeted disease           |
|----------------------------------|-----------|-------------------------------------------------------------------------------------------------------------|-------------------------------------------------|
| Aablaquin                        | S*        | Cinchona officinalis (Rubiaceae)                                                                            | Antiparasitic                                   |
| Abraxane                         | ND        | Taxus wallichiana (Taxaceae); Taxus brevifolia (Taxaceae)                                                   | Oncological disease                             |
| Acarbose                         | N         | Actinoplanes (Micromonosporaceae)                                                                           | Cardiovascular disease                          |
| Acetylcholine chloride           | N         | Homo sapiens (Hominidae)                                                                                    | Neurological disease                            |
| Acetyldigitoxin                  | ND        | Digitalis purpurea (Plantaginaceae)                                                                         | Cardiovascular disease                          |
| Acheflan                         | N         | Cordia verbenacea (Boraginaceae)                                                                            | Immunological, inflammatory and related disease |
| Acitretin                        | ND        | Daucus carota (Apiaceae)                                                                                    | Antipsoriatic                                   |
| Aclarubicin                      | N         | Streptomyces galilaeus (Streptomycetaceae)                                                                  | Oncological disease                             |
| Actimmune Interferon gamma-1b    | B         | Homo sapiens (Hominidae)                                                                                    | Immunostimulant                                 |
| Activated protein C concn        | B         | Homo sapiens (Hominidae)                                                                                    | Deep venous thrombosis                          |
| Acyclovir                        | S*        | Streptomyces antibioticus (Streptomycetaceae); Streptomyces griseus (Streptomycetaceae); Tethya (Tethyidae) | Antiviral                                       |
| Adalimumab                       | B         | Homo sapiens (Hominidae)                                                                                    | Antiarthritic                                   |
| Adefovir dipivoxil               | S*        | Simplexvirus (Herpesviridae); Hepatitis B virus (Hepadnaviridae); Homo sapiens (Hominidae)                  | Antiviral                                       |
| Adenosine                        | N         | Homo sapiens (Hominidae)                                                                                    | Antiarrhythmic                                  |
| Adoniside                        | N         | Adonis vernalis (Ranunculaceae)                                                                             | Cardiovascular disease                          |
| Advate Rec-antihemophilic factor | B         | Homo sapiens (Hominidae)                                                                                    | Antihemophilia                                  |
| Aescin                           | N         | Aesculus hippocastanum (Hippocastanaceae)                                                                   | Inflammatory disease                            |
| Agalsidase alfa                  | B         | Homo sapiens (Hominidae)                                                                                    | Fabry disease                                   |
| Agalsidase beta                  | B         | Homo sapiens (Hominidae)                                                                                    | Fabry disease                                   |
| Agrimophol                       | N         | Agrimonia eupatoria (Rosaceae)                                                                              | Anthelmintic Chemotherapy                       |
| Aimmugen Hepatitis a vaccine     | V         | Hepatitis A virus (Picornaviridae)                                                                          | Hepatitis                                       |
| Ajmalicine                       | N         | Catharanthus roseus (Apocynaceae); Rauvolfia serpentina (Apocynaceae)                                       | Circulatory disorders                           |
| Alacepril                        | S*/NM     | Bothrops jararaca (Viperidae)                                                                               | Cardiovascular disease                          |

|                              |       |                                                                                                                                              |                             |
|------------------------------|-------|----------------------------------------------------------------------------------------------------------------------------------------------|-----------------------------|
| Alclometasone dipropionate   | ND    | Homo sapiens (Hominidae)                                                                                                                     | Inflammatory disease        |
| Aldesleukin                  | B     | Homo sapiens (Hominidae)                                                                                                                     | Anticancer                  |
| Alefacept                    | B     | Homo sapiens (Hominidae)                                                                                                                     | Antipsoriatic               |
| Alemtuzumab                  | B     | Mus musculus (Muridae)                                                                                                                       | Anticancer                  |
| Alfaferone Interferon alfa   | B     | Homo sapiens (Hominidae)                                                                                                                     | Antiviral                   |
| Alferon N Interferon alfa-n3 | B     | Homo sapiens (Hominidae)                                                                                                                     | Antiviral                   |
| Alglucerase                  | B     | Homo sapiens (Hominidae)                                                                                                                     | Type 1 Gaucher's disease    |
| Alitretinoin                 | ND    | Daucus carota (Apiaceae)                                                                                                                     | Anticancer                  |
| Allantoin                    | N     | Symphytum officinale (Nitrariaceae)                                                                                                          | Vulnerary                   |
| Allyl isothiocyanate         | N     | Brassica nigra (Brassicaceae)                                                                                                                | Rubefacient                 |
| Alpha-1 antitrypsin          | B     | Homo sapiens (Hominidae)                                                                                                                     | Antiemphysemic              |
| Alpha-acetyldigoxin          | ND    | Digitalis lanata (Plantaginaceae); Digitalis purpurea (Plantaginaceae)                                                                       | Cardiovascular disease      |
| AlphaNine Factor IX          | B     | Homo sapiens (Hominidae)                                                                                                                     | Hemophilia                  |
| Alprostadil                  | N     | Allium cepa (Amaryllidaceae); Allium sativum (Amaryllidaceae); Larix sibirica (Pinaceae); Populus balsamifera (Salicaceae)                   | Erectile dysfunction        |
| Alteplase                    | B     | Homo sapiens (Hominidae)                                                                                                                     | Antithrombotic              |
| Ambirix Hepatitis vaccine    | V     | Hepatitis A virus (Picornaviridae); Hepatitis B virus (Hepadnaviridae)                                                                       | Antiviral                   |
| Amikacin                     | ND    | Streptomyces kanamyceticus (Streptomycetaceae)                                                                                               | Antibacterial               |
| Amodiaquine                  | ND    | Cinchona (Rubiaceae); Cinchona officinalis (Rubiaceae)                                                                                       | Antiparasitic               |
| Amoxicillin                  | ND    | Aspergillus flavus (Trichocomaceae); Emericella nidulans (Trichocomaceae); Penicillium chrysogenum (Trichocomaceae)                          | Antibacterial               |
| Amphetamine                  | N     | Ephedra sinica (Ephedraceae); Acacia rigidula (Fabaceae); Senegalia berlandieri (Fabaceae)                                                   | Neurological disease        |
| Amphotericin                 | N     | Streptomyces nodosus (Streptomycetaceae)                                                                                                     | Antibacterial               |
| Ampicillin                   | ND    | Aspergillus flavus (Trichocomaceae); Emericella nidulans (Trichocomaceae); Penicillium chrysogenum (Trichocomaceae)                          | Antibacterial               |
| Amprenavir                   | S*/NM | Actinomyces (Actinomycetaceae); Streptomyces testaceus (Streptomycetaceae); Streptomyces argenteolus subsp. toyonakensis (Streptomycetaceae) | Antiviral                   |
| Amrubicin HCL                | ND    | Streptomyces peucetius (Streptomycetaceae)                                                                                                   | Anticancer                  |
| Anakinra                     | B     | Homo sapiens (Hominidae)                                                                                                                     | Antiarthritic               |
| Andrographolide              | N     | Andrographis paniculata (Acanthaceae)                                                                                                        | Antibacterial               |
| Anecortave acetate           | ND    | Homo sapiens (Hominidae)                                                                                                                     | Macular degeneration        |
| Angeliq                      | ND    | Homo sapiens (Hominidae)                                                                                                                     | Hormone replacement therapy |
| Angiotensin II               | N     | Homo sapiens (Hominidae)                                                                                                                     | Anticancer                  |
| Anidulafungin                | ND    | Aspergillus (Trichocomaceae); Emericella rugulosa (Trichocomaceae)                                                                           | Antifungal                  |
| Anisodamine                  | N     | Anisodus tanguticus (Solanaceae)                                                                                                             | Anticholinergic             |

|                           |       |                                                                                                                                                                    |                           |
|---------------------------|-------|--------------------------------------------------------------------------------------------------------------------------------------------------------------------|---------------------------|
| Anisodine                 | N     | Anisodus tanguticus (Solanaceae)                                                                                                                                   | Anticholinergic           |
| Anistreolase              | B     | Homo sapiens (Hominidae); Streptococcus (Streptococcaceae)                                                                                                         | Antithrombotic            |
| Antebate                  | ND    | Homo sapiens (Hominidae)                                                                                                                                           | Inflammatory disease      |
| Antithrombin III          | B     | Homo sapiens (Hominidae)                                                                                                                                           | Anticoagulant             |
| Aotal                     | S*    | Homo sapiens (Hominidae)                                                                                                                                           | Alcohol deterrent         |
| Apalcillin sodium         | ND    | Aspergillus flavus (Trichocomaceae); Emericella nidulans (Trichocomaceae); Penicillium chrysogenum (Trichocomaceae)                                                | Antibacterial             |
| Apidra Insulin glulisine  | B     | Homo sapiens (Hominidae)                                                                                                                                           | Antidiabetic              |
| Apomorphine hydrochloride | ND    | Papaver somniferum (Papaveraceae)                                                                                                                                  | Neurological disease      |
| Aprotinin                 | N     | Bos taurus (Bovidae)                                                                                                                                               | Ischemia                  |
| Aralast                   | B     | Homo sapiens (Hominidae)                                                                                                                                           | Antiemyphemic             |
| Arbekacin                 | ND    | Streptomyces kanamyceticus (Streptomycetaceae)                                                                                                                     | Antibacterial             |
| Arecoline                 | N     | Areca catechu (Arecaceae)                                                                                                                                          | Anthelmintic Chemotherapy |
| Argatroban                | S*/NM | Homo sapiens (Hominidae)                                                                                                                                           | Antithrombotic            |
| Arglabin                  | N     | Artemisia (Asteraceae)                                                                                                                                             | Oncological disease       |
| Aromasin                  | ND    | Homo sapiens (Hominidae)                                                                                                                                           | Anticancer                |
| Arteether                 | ND    | Artemisia annua (Asteraceae)                                                                                                                                       | Antiparasitic             |
| Arteflene                 | ND    | Artabotrys (Annonaceae)                                                                                                                                            | Antiparasitic             |
| Artemether                | ND    | Artemisia annua (Asteraceae)                                                                                                                                       | Antiparasitic             |
| Artemisinin               | N     | Artemisia annua (Asteraceae)                                                                                                                                       | Antiparasitic             |
| Artesunate                | ND    | Artemisia annua (Asteraceae)                                                                                                                                       | Antiparasitic             |
| Asiaticoside              | N     | Centella asiatica (Apiaceae)                                                                                                                                       | Vulnerary                 |
| Asparaginase              | N     | Escherichia coli (Enterobacteriaceae)                                                                                                                              | Oncological disease       |
| Aspirin                   | ND    | Salix alba (Salicaceae)                                                                                                                                            | Inflammatory disease      |
| Aspoxicillin              | ND    | Aspergillus flavus (Trichocomaceae); Emericella nidulans (Trichocomaceae); Penicillium chrysogenum (Trichocomaceae)                                                | Antibacterial             |
| Atazanavir                | S*/NM | Actinomyces (Actinomycetaceae); Streptomyces testaceus (Streptomycetaceae); Streptomyces argenteolus subsp. toyonakensis (Streptomycetaceae)                       | Antiviral                 |
| Atenolol                  | ND    | Ephedra sinica (Ephedraceae); Acacia rigidula (Fabaceae); Senegalia berlandieri (Fabaceae)                                                                         | Cardiovascular disease    |
| Atorvastatin calcium      | S*/NM | Pseudonocardia autotrophica (Pseudonocardiaceae); Penicillium brevicompactum (Trichocomaceae); Penicillium citrinum (Trichocomaceae)                               | Cardiovascular disease    |
| Atosiban                  | ND    | Homo sapiens (Hominidae)                                                                                                                                           | Premature birth           |
| Atovaquone                | S*    | Homo sapiens (Hominidae)                                                                                                                                           | Antiparasitic             |
| Atropine                  | N     | Atropa belladonna (Solanaceae); Datura stramonium (Solanaceae); Mandragora officinarum (Solanaceae)                                                                | Anticholinergic           |
| Augmentin                 | ND    | Streptomyces clavuligerus (Streptomycetaceae); Aspergillus flavus (Trichocomaceae); Emericella nidulans (Trichocomaceae); Penicillium chrysogenum (Trichocomaceae) | Antibacterial             |

|                                |       |                                                                                                                     |                         |
|--------------------------------|-------|---------------------------------------------------------------------------------------------------------------------|-------------------------|
| Avaxim hepatitis a vaccine     | V     | Hepatitis A virus (Picornaviridae)                                                                                  | Hepatitis               |
| Avonex Interferon beta-1a      | B     | Homo sapiens (Hominidae)                                                                                            | Multiple sclerosis      |
| Azacytidine                    | S*    | Homo sapiens (Hominidae)                                                                                            | Anticancer              |
| Azithromycin                   | ND    | Saccharopolyspora erythraea (Pseudonocardiaceae)                                                                    | Antibacterial           |
| Azlocillin                     | ND    | Aspergillus flavus (Trichocomaceae); Emericella nidulans (Trichocomaceae); Penicillium chrysogenum (Trichocomaceae) | Antibacterial           |
| Aztreonam                      | ND    | Chromobacterium violaceum (Neisseriaceae)                                                                           | Antibacterial           |
| Bacampicillin                  | ND    | Aspergillus flavus (Trichocomaceae); Emericella nidulans (Trichocomaceae); Penicillium chrysogenum (Trichocomaceae) | Antibacterial           |
| Bacitracin                     | N     | Bacillus licheniformis (Bacillaceae); Bacillus subtilis (Bacillaceae)                                               | Antibacterial           |
| Basiliximab                    | B     | Homo sapiens (Hominidae)                                                                                            | Immunosuppressant       |
| Becaplermin                    | B     | Homo sapiens (Hominidae)                                                                                            | Diabetic foot ulcers    |
| Befunolol HCL                  | S*    | Homo sapiens (Hominidae)                                                                                            | Antiglaucoma            |
| Belotecan HCL                  | ND    | Mappia foetida (Icacinaceae); Camptotheca acuminata (Cornaceae); Ophiorrhiza pumila (Rubiaceae)                     | Oncological disease     |
| Bemiparin sodium               | ND    | Homo sapiens (Hominidae)                                                                                            | DVT; anticoagulant      |
| Benazepril hydrochloride       | S*/NM | Bothrops jararaca (Viperidae)                                                                                       | Cardiovascular disease  |
| Benefix Factor IX              | B     | Homo sapiens (Hominidae)                                                                                            | Hemophilia              |
| Beraprost sodium               | ND    | Homo sapiens (Hominidae)                                                                                            | Platelet aggreg. inhib. |
| Berberine                      | N     | Berberis vulgaris (Berberidaceae); Thalictrum (Ranunculaceae)                                                       | Antibacterial           |
| Beromun                        | B     | Homo sapiens (Hominidae)                                                                                            | Anticancer              |
| Beta-acetyldigoxin             | ND    | Digitalis lanata (Plantaginaceae); Digitalis purpurea (Plantaginaceae)                                              | Cardiovascular disease  |
| Betain anhydrous               | N     | Triticum (Poaceae)                                                                                                  | Homocystinuria          |
| Betamethasone dipropionate     | N     | Homo sapiens (Hominidae)                                                                                            | Anti-inflammatory       |
| Betamethasone sodium phosphate | N     | Homo sapiens (Hominidae)                                                                                            | Anti-inflammatory       |
| Betaseron Interferon b-1b      | B     | Homo sapiens (Hominidae)                                                                                            | Multiple sclerosis      |
| Betaxolol HCl                  | S*/NM | Ephedra sinica (Ephedraceae); Acacia rigidula (Fabaceae); Senegalia berlandieri (Fabaceae)                          | Cardiovascular disease  |
| Bevacizumab                    | B     | Mus musculus (Muridae)                                                                                              | Anticancer              |
| Biapenem                       | ND    | Streptomyces cattleya (Streptomycetaceae)                                                                           | Antibacterial           |
| Biken-HB Hepatitis b vaccine   | V     | Hepatitis B virus (Hepadnaviridae)                                                                                  | Hepatitis               |
| Bilive                         | V     | Hepatitis A virus (Picornaviridae); Hepatitis B virus (Hepadnaviridae)                                              | Antiviral               |
| Bimatoprost                    | ND    | Allium sativum (Amaryllidaceae); Artemisia dracunculus (Asteraceae); Manduca sexta (Sphingidae)                     | Antiglaucoma            |
| Biogamma Interferon gamma-1a   | B     | Homo sapiens (Hominidae)                                                                                            | Anticancer              |



|                                  |       |                                                                                                                                                                    |                                                 |
|----------------------------------|-------|--------------------------------------------------------------------------------------------------------------------------------------------------------------------|-------------------------------------------------|
| Bio-Hep B<br>Hepatitis b vaccine | V     | Hepatitis B virus (Hepadnaviridae)                                                                                                                                 | Hepatitis                                       |
| Bivalirudin                      | ND    | Haementeria officinalis (Glossiphoniidae); Hirudo medicinalis (Hirudinidae)                                                                                        | Cardiovascular disease                          |
| Bleomycin                        | N     | Streptomyces verticillus (Streptomycetaceae)                                                                                                                       | Oncological disease                             |
| Bortezomib                       | S/NM  | Homo sapiens (Hominidae)                                                                                                                                           | Anticancer                                      |
| Brovincamine fumarate            | ND    | Vinca minor (Apocynaceae)                                                                                                                                          | Vasodilator, cerebral                           |
| Bucillamine                      | ND    | Aspergillus flavus (Trichocomaceae); Emericella nidulans (Trichocomaceae); Penicillium chrysogenum (Trichocomaceae)                                                | Immunomodulator                                 |
| Bucladesine sodium               | S*/NM | Homo sapiens (Hominidae)                                                                                                                                           | Cardiotonic                                     |
| Budesonide                       | ND    | Homo sapiens (Hominidae)                                                                                                                                           | Antiasthmatic                                   |
| Buprenorphine                    | ND    | Papaver bracteatum (Papaveraceae); Papaver somniferum (Papaveraceae)                                                                                               | Neurological disease                            |
| Buserelin acetate                | ND    | Homo sapiens (Hominidae)                                                                                                                                           | Oncological disease                             |
| Byetta                           | ND    | Heloderma suspectum (Helodermatidae)                                                                                                                               | Cardiovascular disease                          |
| Cabazitaxel                      | ND    | Taxus wallichiana (Taxaceae); Taxus brevifolia (Taxaceae); Taxus baccata (Taxaceae); Corylus avellana (Betulaceae); Seimatoantlerium tepuiense (Amphisphaeriaceae) | Anticancer                                      |
| Cabergoline                      | ND    | Claviceps (Clavicipitaceae)                                                                                                                                        | Antihyperprolactinemia                          |
| Calcipotriol                     | ND    | Salmonidae (Salmonidae); Agaricus bisporus (Agaricaceae)                                                                                                           | Antipsoriatic                                   |
| Calfactant                       | B     | Bos primigenius (Bovidae)                                                                                                                                          | RDS                                             |
| Calsed                           | ND    | Streptomyces peucetius (Streptomycetaceae)                                                                                                                         | Oncological disease                             |
| Calusterone                      | ND    | Homo sapiens (Hominidae)                                                                                                                                           | Oncological disease                             |
| Camphor                          | N     | Cinnamomum camphora (Lauraceae)                                                                                                                                    | Rubefacient                                     |
| Camptobell                       | ND    | Camptotheca acuminata (Cornaceae)                                                                                                                                  | Anticancer                                      |
| Camptothecin                     | ND    | Mappia foetida (Icacinaeae); Camptotheca acuminata (Cornaceae); Ophiorrhiza pumila (Rubiaceae)                                                                     | Oncological disease                             |
| Candesartan cilexetil            | S/NM  | Rattus norvegicus (Muridae)                                                                                                                                        | Antihypertensive                                |
| Candididin                       | N     | Streptomyces griseus (Streptomycetaceae)                                                                                                                           | Antifungal                                      |
| Capecitabine                     | S*    | Homo sapiens (Hominidae)                                                                                                                                           | Anticancer                                      |
| Capreomycin                      | N     | Saccharothrix mutabilis subsp. Capreolus (Actinosynnemataceae)                                                                                                     | Antibacterial                                   |
| Capsaicin                        | N     | Capsicum annum (Solanaceae); Capsicum frutescens (Solanaceae); Zingiber officinale (Zingiberaceae)                                                                 | Neurological disease                            |
| Captopril                        | ND    | Bothrops jararaca (Viperidae)                                                                                                                                      | Cardiovascular disease                          |
| Carbenicillin                    | ND    | Aspergillus flavus (Trichocomaceae); Emericella nidulans (Trichocomaceae); Penicillium chrysogenum (Trichocomaceae)                                                | Antibacterial                                   |
| Carbenin                         | ND    | Streptomyces cattleya (Streptomycetaceae)                                                                                                                          | Antibacterial                                   |
| Carbenoxolone                    | ND    | Glycyrrhiza glabra (Fabaceae)                                                                                                                                      | Immunological, inflammatory and related disease |
| Carindacillin                    | ND    | Aspergillus flavus (Trichocomaceae); Emericella nidulans (Trichocomaceae); Penicillium chrysogenum (Trichocomaceae)                                                | Antibacterial                                   |

|                      |    |                                                                                                                                                                             |                          |
|----------------------|----|-----------------------------------------------------------------------------------------------------------------------------------------------------------------------------|--------------------------|
| Carmofur             | S* | Homo sapiens (Hominidae)                                                                                                                                                    | Anticancer               |
| Carperitide          | N  | Homo sapiens (Hominidae)                                                                                                                                                    | Congestive heart failure |
| Carumonam            | ND | Chromobacterium violaceum (Neisseriaceae)                                                                                                                                   | Antibacterial            |
| Carzinophilin        | N  | Streptomyces sahachiroi (Streptomycetaceae)                                                                                                                                 | Oncological disease      |
| Cefacetile           | ND | Acremonium chrysogenum (Acremonium); Emericellopsis minima (Emericellopsis); Amycolatopsis lactamdurans (Pseudonocardiaceae); Streptomyces clavuligerus (Streptomycetaceae) | Antibacterial            |
| Cefaclor             | ND | Acremonium chrysogenum (Acremonium); Emericellopsis minima (Emericellopsis); Amycolatopsis lactamdurans (Pseudonocardiaceae); Streptomyces clavuligerus (Streptomycetaceae) | Antibacterial            |
| Cefadroxil           | ND | Acremonium chrysogenum (Acremonium); Emericellopsis minima (Emericellopsis); Amycolatopsis lactamdurans (Pseudonocardiaceae); Streptomyces clavuligerus (Streptomycetaceae) | Antibacterial            |
| Cefalexin            | ND | Acremonium chrysogenum (Acremonium); Emericellopsis minima (Emericellopsis); Amycolatopsis lactamdurans (Pseudonocardiaceae); Streptomyces clavuligerus (Streptomycetaceae) | Antibacterial            |
| Cefaloglycin         | ND | Acremonium chrysogenum (Acremonium); Emericellopsis minima (Emericellopsis); Amycolatopsis lactamdurans (Pseudonocardiaceae); Streptomyces clavuligerus (Streptomycetaceae) | Antibacterial            |
| Cefalotin sodium     | ND | Acremonium chrysogenum (Acremonium); Emericellopsis minima (Emericellopsis); Amycolatopsis lactamdurans (Pseudonocardiaceae); Streptomyces clavuligerus (Streptomycetaceae) | Antibacterial            |
| Cefamandole nafate   | ND | Acremonium chrysogenum (Acremonium); Emericellopsis minima (Emericellopsis); Amycolatopsis lactamdurans (Pseudonocardiaceae); Streptomyces clavuligerus (Streptomycetaceae) | Antibacterial            |
| Cefapirin            | ND | Acremonium chrysogenum (Acremonium); Emericellopsis minima (Emericellopsis); Amycolatopsis lactamdurans (Pseudonocardiaceae); Streptomyces clavuligerus (Streptomycetaceae) | Antibacterial            |
| Cefazolin            | ND | Acremonium chrysogenum (Acremonium); Emericellopsis minima (Emericellopsis); Amycolatopsis lactamdurans (Pseudonocardiaceae); Streptomyces clavuligerus (Streptomycetaceae) | Antibacterial            |
| Cefbuperazone sodium | ND | Acremonium chrysogenum (Acremonium); Emericellopsis minima (Emericellopsis); Amycolatopsis lactamdurans (Pseudonocardiaceae); Streptomyces clavuligerus (Streptomycetaceae) | Antibacterial            |
| Cefcapene pivoxil    | ND | Acremonium chrysogenum (Acremonium); Emericellopsis minima (Emericellopsis); Amycolatopsis lactamdurans (Pseudonocardiaceae); Streptomyces clavuligerus (Streptomycetaceae) | Antibacterial            |
| Cefdinir             | ND | Acremonium chrysogenum (Acremonium); Emericellopsis minima (Emericellopsis); Amycolatopsis lactamdurans (Pseudonocardiaceae); Streptomyces clavuligerus (Streptomycetaceae) | Antibacterial            |

|                       |    |                                                                                                                                                                             |               |
|-----------------------|----|-----------------------------------------------------------------------------------------------------------------------------------------------------------------------------|---------------|
| Cefditoren pivoxil    | ND | Acremonium chrysogenum (Acremonium); Emericellopsis minima (Emericellopsis); Amycolatopsis lactamdurans (Pseudonocardiaceae); Streptomyces clavuligerus (Streptomycetaceae) | Antibacterial |
| Cefepime              | ND | Acremonium chrysogenum (Acremonium); Emericellopsis minima (Emericellopsis); Amycolatopsis lactamdurans (Pseudonocardiaceae); Streptomyces clavuligerus (Streptomycetaceae) | Antibacterial |
| Cefetamet pivoxil HCl | ND | Acremonium chrysogenum (Acremonium); Emericellopsis minima (Emericellopsis); Amycolatopsis lactamdurans (Pseudonocardiaceae); Streptomyces clavuligerus (Streptomycetaceae) | Antibacterial |
| Cefixime              | ND | Acremonium chrysogenum (Acremonium); Emericellopsis minima (Emericellopsis); Amycolatopsis lactamdurans (Pseudonocardiaceae); Streptomyces clavuligerus (Streptomycetaceae) | Antibacterial |
| Cefmenoxime HCl       | ND | Acremonium chrysogenum (Acremonium); Emericellopsis minima (Emericellopsis); Amycolatopsis lactamdurans (Pseudonocardiaceae); Streptomyces clavuligerus (Streptomycetaceae) | Antibacterial |
| Cefmetazole sodium    | ND | Amycolatopsis lactamdurans (Pseudonocardiaceae); Streptomyces cattleya (Streptomycetaceae); Streptomyces clavuligerus (Streptomycetaceae)                                   | Antibacterial |
| Cefminox sodium       | ND | Acremonium chrysogenum (Acremonium); Emericellopsis minima (Emericellopsis); Amycolatopsis lactamdurans (Pseudonocardiaceae); Streptomyces clavuligerus (Streptomycetaceae) | Antibacterial |
| Cefodizime sodium     | ND | Acremonium chrysogenum (Acremonium); Emericellopsis minima (Emericellopsis); Amycolatopsis lactamdurans (Pseudonocardiaceae); Streptomyces clavuligerus (Streptomycetaceae) | Antibacterial |
| Cefonicid sodium      | ND | Acremonium chrysogenum (Acremonium); Emericellopsis minima (Emericellopsis); Amycolatopsis lactamdurans (Pseudonocardiaceae); Streptomyces clavuligerus (Streptomycetaceae) | Antibacterial |
| Cefoperazone sodium   | ND | Acremonium chrysogenum (Acremonium); Emericellopsis minima (Emericellopsis); Amycolatopsis lactamdurans (Pseudonocardiaceae); Streptomyces clavuligerus (Streptomycetaceae) | Antibacterial |
| Ceforanide            | ND | Acremonium chrysogenum (Acremonium); Emericellopsis minima (Emericellopsis); Amycolatopsis lactamdurans (Pseudonocardiaceae); Streptomyces clavuligerus (Streptomycetaceae) | Antibacterial |
| Cefoselis             | ND | Acremonium chrysogenum (Acremonium); Emericellopsis minima (Emericellopsis); Amycolatopsis lactamdurans (Pseudonocardiaceae); Streptomyces clavuligerus (Streptomycetaceae) | Antibacterial |
| Cefotaxime sodium     | ND | Acremonium chrysogenum (Acremonium); Emericellopsis minima (Emericellopsis); Amycolatopsis lactamdurans (Pseudonocardiaceae); Streptomyces clavuligerus (Streptomycetaceae) | Antibacterial |
| Cefotetan sodium      | ND | Amycolatopsis lactamdurans (Pseudonocardiaceae); Streptomyces cattleya (Streptomycetaceae); Streptomyces clavuligerus (Streptomycetaceae)                                   | Antibacterial |

|                          |    |                                                                                                                                                                             |               |
|--------------------------|----|-----------------------------------------------------------------------------------------------------------------------------------------------------------------------------|---------------|
| Cefotiam hexetil HCL     | ND | Acremonium chrysogenum (Acremonium); Emericellopsis minima (Emericellopsis); Amycolatopsis lactamdurans (Pseudonocardiaceae); Streptomyces clavuligerus (Streptomycetaceae) | Antibacterial |
| Cefoxitin sodium         | ND | Amycolatopsis lactamdurans (Pseudonocardiaceae); Streptomyces cattleya (Streptomycetaceae); Streptomyces clavuligerus (Streptomycetaceae)                                   | Antibacterial |
| Cefozopran HCL           | ND | Acremonium chrysogenum (Acremonium); Emericellopsis minima (Emericellopsis); Amycolatopsis lactamdurans (Pseudonocardiaceae); Streptomyces clavuligerus (Streptomycetaceae) | Antibacterial |
| Cefpimizole              | ND | Acremonium chrysogenum (Acremonium); Emericellopsis minima (Emericellopsis); Amycolatopsis lactamdurans (Pseudonocardiaceae); Streptomyces clavuligerus (Streptomycetaceae) | Antibacterial |
| Cefpiramide sodium       | ND | Acremonium chrysogenum (Acremonium); Emericellopsis minima (Emericellopsis); Amycolatopsis lactamdurans (Pseudonocardiaceae); Streptomyces clavuligerus (Streptomycetaceae) | Antibacterial |
| Cefpirome sulfate        | ND | Acremonium chrysogenum (Acremonium); Emericellopsis minima (Emericellopsis); Amycolatopsis lactamdurans (Pseudonocardiaceae); Streptomyces clavuligerus (Streptomycetaceae) | Antibacterial |
| Cefpodoxime proxetil     | ND | Acremonium chrysogenum (Acremonium); Emericellopsis minima (Emericellopsis); Amycolatopsis lactamdurans (Pseudonocardiaceae); Streptomyces clavuligerus (Streptomycetaceae) | Antibacterial |
| Cefprozil                | ND | Acremonium chrysogenum (Acremonium); Emericellopsis minima (Emericellopsis); Amycolatopsis lactamdurans (Pseudonocardiaceae); Streptomyces clavuligerus (Streptomycetaceae) | Antibacterial |
| Cefradine                | ND | Acremonium chrysogenum (Acremonium); Emericellopsis minima (Emericellopsis); Amycolatopsis lactamdurans (Pseudonocardiaceae); Streptomyces clavuligerus (Streptomycetaceae) | Antibacterial |
| Cefroxadine              | ND | Acremonium chrysogenum (Acremonium); Emericellopsis minima (Emericellopsis); Amycolatopsis lactamdurans (Pseudonocardiaceae); Streptomyces clavuligerus (Streptomycetaceae) | Antibacterial |
| Cefsulodin               | ND | Acremonium chrysogenum (Acremonium)                                                                                                                                         | Antibiotic    |
| Ceftaroline fosamil      | ND | Acremonium (Acremonium)                                                                                                                                                     | Antibiotic    |
| Ceftazidime pentahydrate | ND | Acremonium chrysogenum (Acremonium); Emericellopsis minima (Emericellopsis); Amycolatopsis lactamdurans (Pseudonocardiaceae); Streptomyces clavuligerus (Streptomycetaceae) | Antibacterial |
| Cefteram pivoxil         | ND | Acremonium chrysogenum (Acremonium); Emericellopsis minima (Emericellopsis); Amycolatopsis lactamdurans (Pseudonocardiaceae); Streptomyces clavuligerus (Streptomycetaceae) | Antibacterial |
| Ceftazole                | ND | Acremonium chrysogenum (Acremonium); Emericellopsis minima (Emericellopsis); Amycolatopsis lactamdurans (Pseudonocardiaceae); Streptomyces clavuligerus (Streptomycetaceae) | Antibacterial |

|                         |    |                                                                                                                                                                              |                     |
|-------------------------|----|------------------------------------------------------------------------------------------------------------------------------------------------------------------------------|---------------------|
| Ceftibuten              | ND | Acremonium chrysogenum (Acremonium); Emericellopsis minima (Emericellopsis); Amycolatopsis lactamdurans (Pseudonocardiaaceae); Streptomyces clavuligerus (Streptomycetaceae) | Antibacterial       |
| Ceftiofur               | ND | Acremonium chrysogenum (Acremonium); Emericellopsis minima (Emericellopsis); Amycolatopsis lactamdurans (Pseudonocardiaaceae); Streptomyces clavuligerus (Streptomycetaceae) | Antibacterial       |
| Ceftizoxime sodium      | ND | Acremonium chrysogenum (Acremonium); Emericellopsis minima (Emericellopsis); Amycolatopsis lactamdurans (Pseudonocardiaaceae); Streptomyces clavuligerus (Streptomycetaceae) | Antibacterial       |
| Ceftobiprole medocaril  | ND | Acremonium chrysogenum (Acremonium); Emericellopsis minima (Emericellopsis); Amycolatopsis lactamdurans (Pseudonocardiaaceae); Streptomyces clavuligerus (Streptomycetaceae) | Antibacterial       |
| Ceftriaxone sodium      | ND | Acremonium chrysogenum (Acremonium); Emericellopsis minima (Emericellopsis); Amycolatopsis lactamdurans (Pseudonocardiaaceae); Streptomyces clavuligerus (Streptomycetaceae) | Antibacterial       |
| Cefuroxime axetil       | ND | Acremonium chrysogenum (Acremonium); Emericellopsis minima (Emericellopsis); Amycolatopsis lactamdurans (Pseudonocardiaaceae); Streptomyces clavuligerus (Streptomycetaceae) | Antibacterial       |
| Cefuzonam sodium        | ND | Acremonium chrysogenum (Acremonium); Emericellopsis minima (Emericellopsis); Amycolatopsis lactamdurans (Pseudonocardiaaceae); Streptomyces clavuligerus (Streptomycetaceae) | Antibacterial       |
| Celeuk                  | B  | Homo sapiens (Hominidae)                                                                                                                                                     | Anticancer          |
| Celiprolol HCl          | S* | Homo sapiens (Hominidae)                                                                                                                                                     | Antihypertensive    |
| Celmoleukin             | B  | Homo sapiens (Hominidae)                                                                                                                                                     | Anticancer          |
| Centoxin                | B  | Homo sapiens (Hominidae)                                                                                                                                                     | Antisepsis          |
| Ceprotrin Protein C     | B  | Homo sapiens (Hominidae)                                                                                                                                                     | Purpura fulminans   |
| Certoparin sodium       | ND | Homo sapiens (Hominidae)                                                                                                                                                     | DVT; anticoagulant  |
| Cerubidine              | N  | Streptomyces coeruleorubidus (Streptomycetaceae); Streptomyces peucetius (Streptomycetaceae)                                                                                 | Oncological disease |
| Cetrorelix              | ND | Homo sapiens (Hominidae)                                                                                                                                                     | Fertility enhancer  |
| Cetuximab               | B  | Homo sapiens (Hominidae)                                                                                                                                                     | Anticancer          |
| Chenodiol               | N  | Homo sapiens (Hominidae)                                                                                                                                                     | Anticholelithogenic |
| Chloramphenicol         | N  | Streptomyces venezuelae (Streptomycetaceae)                                                                                                                                  | Antibacterial       |
| Chloroquine             | ND | Cinchona officinalis (Rubiaceae)                                                                                                                                             | Antiparasitic       |
| Chlorotrianisene        | S  | Homo sapiens (Hominidae)                                                                                                                                                     | Anticancer          |
| Chlortetracycline       | N  | Streptomyces aureofaciens (Streptomycetaceae)                                                                                                                                | Antibacterial       |
| Choline alfoscerate     | N  | Homo sapiens (Hominidae)                                                                                                                                                     | Nootropic           |
| Choriogonadotropin alfa | B  | Homo sapiens (Hominidae)                                                                                                                                                     | Hormone             |
| Chromomycin A3          | N  | Streptomyces griseus (Streptomycetaceae)                                                                                                                                     | Oncological disease |
| Ciclesonide             | ND | Homo sapiens (Hominidae)                                                                                                                                                     | Antiasthmatic       |
| Cidofovir               | S* | Cytomegalovirus (Herpesviridae); Homo sapiens                                                                                                                                | Antiviral           |

|                        |       |                                                                                                                                                        |                             |
|------------------------|-------|--------------------------------------------------------------------------------------------------------------------------------------------------------|-----------------------------|
|                        |       | (Hominidae)                                                                                                                                            |                             |
| Cilazapril             | S*/NM | Bothrops jararaca (Viperidae)                                                                                                                          | Cardiovascular disease      |
| Cimetropium bromide    | ND    | Datura metel (Solanaceae)                                                                                                                              | Antispasmodic               |
| Cisatracurium besilate | S*    | Leontice leontopetalum (Berberidaceae)                                                                                                                 | Muscle relaxant             |
| Cissampeline           | N     | Cissampelos pareira (Menispermaceae)                                                                                                                   | Skeletal muscle relaxant    |
| Cladribine             | ND    | Homo sapiens (Hominidae)                                                                                                                               | Anticancer                  |
| Clarithromycin         | ND    | Saccharopolyspora erythraea (Pseudonocardiaceae)                                                                                                       | Antibacterial               |
| Climara Pro            | ND    | Homo sapiens (Hominidae)                                                                                                                               | Hormone replacement therapy |
| Clindamycin            | ND    | Streptomyces lincolnensis (Streptomycetaceae)                                                                                                          | Antibacterial               |
| Clofarabine            | S*    | Homo sapiens (Hominidae); Homo sapiens (Hominidae)                                                                                                     | Anticancer                  |
| Clomocycline           | ND    | Streptomyces aureofaciens (Streptomycetaceae); Streptomyces viridifaciens (Streptomycetaceae)                                                          | Antibacterial               |
| Cloxacillin            | ND    | Aspergillus flavus (Trichocomaceae); Emericella nidulans (Trichocomaceae); Penicillium chrysogenum (Trichocomaceae)                                    | Antibacterial               |
| Coarsucam              | ND    | Artemisia annua (Asteraceae); Cinchona officinalis (Rubiaceae)                                                                                         | Antiparasitic               |
| Co-artemether          | ND    | Artemisia annua (Asteraceae)                                                                                                                           | Antiparasitic               |
| Cocaine                | N     | Erythroxylum coca (Erythroxylaceae)                                                                                                                    | Neurological disease        |
| Colchicine amide       | N     | Colchicum autumnale (Colchicaceae)                                                                                                                     | Oncological disease         |
| Colchicine             | N     | Colchicum autumnale (Colchicaceae)                                                                                                                     | Oncological disease         |
| Colforsin daropate HCl | ND    | Plectranthus barbatus (Lamiaceae)                                                                                                                      | Cardiovascular disease      |
| Colistimethate sodium  | ND    | Paenibacillus polymyxa (Paenibacillaceae)                                                                                                              | Pulmonary infections        |
| Colistin               | N     | Paenibacillus polymyxa (Paenibacillaceae)                                                                                                              | Antibiotic                  |
| Collagenase            | B     | Homo sapiens (Hominidae)                                                                                                                               | Enzyme                      |
| Conjugated estrogens a | ND    | Homo sapiens (Hominidae)                                                                                                                               | Hormone replacement therapy |
| Conjugated estrogens b | ND    | Homo sapiens (Hominidae)                                                                                                                               | Hormone replacement therapy |
| Convallatoxin          | N     | Convallaria majalis (Asparagaceae)                                                                                                                     | Cardiovascular disease      |
| Cotinine               | N     | Nicotiana spp. (Solanaceae)                                                                                                                            | Insecticide                 |
| Crotalidae fab         | B     | Ovis aries (Bovidae); Crotalus atrox (Viperidae); Crotalus adamanteus (Viperidae); Crotalus scutulatus (Viperidae); Agkistrodon piscivorus (Viperidae) | Rattlesnake antivenom       |
| Cyclacillin            | ND    | Aspergillus flavus (Trichocomaceae); Emericella nidulans (Trichocomaceae); Penicillium chrysogenum (Trichocomaceae)                                    | Antibiotic                  |
| Cycloserine            | N     | Streptomyces garyphalus (Streptomycetaceae)                                                                                                            | Antibacterial               |
| Cyclosporine           | N     | Claviceps purpurea (Clavicipitaceae); Tolypocladium inflatum (Clavicipitaceae); Cyllindrocarpon lucidum (Nectriaceae)                                  | Neurological disease        |
| Cynarin                | N     | Cynara scolymus (Asteraceae)                                                                                                                           | Choleretic                  |
| Cytarabine ocfosfate   | S*    | Streptomyces antibioticus (Streptomycetaceae); Streptomyces griseus (Streptomycetaceae); Tethya                                                        | Oncological disease         |

|                              |       |                                                                                                                                              |                        |
|------------------------------|-------|----------------------------------------------------------------------------------------------------------------------------------------------|------------------------|
|                              |       | (Tethyidae)                                                                                                                                  |                        |
| Cytosine arabinoside         | S*    | Tethya (Tethyidae)                                                                                                                           | Oncological disease    |
| Dabigatran                   | S*/NM | Homo sapiens (Hominidae)                                                                                                                     | Antithrombotic         |
| Daclizumab                   | B     | Mus musculus (Muridae)                                                                                                                       | Immunosuppressant      |
| Dactinomycin                 | N     | Streptomyces parvulus (Streptomycetaceae); Streptomyces sindenensis (Streptomycetaceae)                                                      | Oncological disease    |
| Dalteparin sodium            | ND    | Homo sapiens (Hominidae)                                                                                                                     | DVT; anticoagulant     |
| Danaparoid sodium            | ND    | Homo sapiens (Hominidae)                                                                                                                     | DVT; anticoagulant     |
| Danthron                     | N     | Cassia (Fabaceae)                                                                                                                            | Laxative               |
| Daptomycin                   | N     | Streptomyces filamentosus (Streptomycetaceae)                                                                                                | Antibacterial          |
| Darbepoietin alfa            | B     | Homo sapiens (Hominidae)                                                                                                                     | Erythropoiesis         |
| Darunavir                    | S*/NM | Actinomyces (Actinomycetaceae); Streptomyces testaceus (Streptomycetaceae); Streptomyces argenteolus subsp. toyonakensis (Streptomycetaceae) | Antiviral              |
| Dasatinib                    | S/NM  | Lentzea albida (Actinosynnemataceae); Lentzea albida (Actinosynnemataceae); Lentzea albida (Actinosynnemataceae)                             | Anticancer             |
| Daunorubicin HCL             | N     | Streptomyces peucetius (Streptomycetaceae)                                                                                                   | Antibiotic             |
| Decapeptyl                   | ND    | Homo sapiens (Hominidae)                                                                                                                     | Oncological disease    |
| Decitabine                   | S*    | Homo sapiens (Hominidae)                                                                                                                     | Anticancer             |
| Defibrotide                  | B     | Bos primigenius (Bovidae); Sus scrofa (Suidae)                                                                                               | Antithrombotic         |
| Deflazacort                  | ND    | Homo sapiens (Hominidae)                                                                                                                     | Inflammatory disease   |
| Delapril                     | S*/NM | Bothrops jararaca (Viperidae)                                                                                                                | Cardiovascular disease |
| Delta-9-tetrahydrocannabinol | N     | Cannabis sativa (Cannabaceae)                                                                                                                | Neurological disease   |
| Demeclocycline               | N     | Streptomyces aureofaciens (Streptomycetaceae)                                                                                                | Antibacterial          |
| Demecolcine                  | N     | Colchicum autumnale (Colchicaceae)                                                                                                           | Oncological disease    |
| Denileukin diftitox          | B     | Corynebacterium diphtheriae (Corynebacteriaceae)                                                                                             | Anticancer             |
| Denopamine                   | S*/NM | Homo sapiens (Hominidae)                                                                                                                     | Cardiotonic            |
| Dermatan sulfate             | B     | Homo sapiens (Hominidae)                                                                                                                     | DVT; anticoagulant     |
| Deserpidine                  | N     | Rauwolfia (Apocynaceae)                                                                                                                      | Cardiovascular disease |
| Desirudin                    | ND    | Haementeria officinalis (Glossiphoniidae); Hirudo medicinalis (Hirudinidae)                                                                  | Deep vein thrombosis   |
| Deslanoside                  | N     | Digitalis lanata (Plantaginaceae)                                                                                                            | Cardiovascular disease |
| Deslorelin                   | ND    | Homo sapiens (Hominidae)                                                                                                                     | Oncological disease    |
| Dexamethasone                | ND    | Homo sapiens (Hominidae)                                                                                                                     | Oncological disease    |
| Dextroamphetamine sulfate    | ND    | Ephedra sinica (Ephedraceae); Acacia rigidula (Fabaceae); Senegalia berlandieri (Fabaceae)                                                   | ADHD; narcolepsy       |
| Dextromethorphan             | ND    | Papaver bracteatum (Papaveraceae); Papaver somniferum (Papaveraceae)                                                                         | Neurological disease   |
| Diacetylmorphine             | ND    | Papaver somniferum (Papaveraceae)                                                                                                            | Neurological disease   |
| Dicloxacillin                | ND    | Aspergillus flavus (Trichocomaceae); Emericella nidulans (Trichocomaceae); Penicillium chrysogenum                                           | Antibacterial          |

|                        |       |                                                                                                                                                                                           |                        |
|------------------------|-------|-------------------------------------------------------------------------------------------------------------------------------------------------------------------------------------------|------------------------|
|                        |       | (Trichocomaceae)                                                                                                                                                                          |                        |
| Didanosine             | S*    | Human immunodeficiency virus 1 (Retroviridae); Homo sapiens (Hominidae)                                                                                                                   | Antiviral              |
| Diethylstilbestrol     | S     | Homo sapiens (Hominidae)                                                                                                                                                                  | Anticancer             |
| DigiFab                | B     | Digitalis purpurea (Plantaginaceae)                                                                                                                                                       | Digoxin toxicity       |
| Digitalin              | N     | Digitalis purpurea (Plantaginaceae)                                                                                                                                                       | Cardiovascular disease |
| Digitoxin              | N     | Digitalis purpurea (Plantaginaceae)                                                                                                                                                       | Cardiovascular disease |
| Digoxin                | N     | Digitalis lanata (Plantaginaceae); Digitalis purpurea (Plantaginaceae)                                                                                                                    | Cardiovascular disease |
| Dihydroartemisinin     | ND    | Artemisia annua (Asteraceae)                                                                                                                                                              | Antiparasitic          |
| Dipeptiven             | ND    | Homo sapiens (Hominidae)                                                                                                                                                                  | Mucositis              |
| Dirithromycin          | ND    | Saccharopolyspora erythraea (Pseudonocardiaceae)                                                                                                                                          | Antibacterial          |
| Docarpamine            | ND    | Homo sapiens (Hominidae)                                                                                                                                                                  | Cardiotonic            |
| Docetaxel              | ND    | Taxus wallichiana (Taxaceae); Taxus baccata (Taxaceae); Taxus brevifolia (Taxaceae)                                                                                                       | Oncological disease    |
| Dopamine hydrochloride | N     | Homo sapiens (Hominidae)                                                                                                                                                                  | Neurological disease   |
| Dopexamine             | S*/NM | Homo sapiens (Hominidae)                                                                                                                                                                  | Cardiotonic            |
| Doripenem              | ND    | Streptomyces cattleya (Streptomycetaceae)                                                                                                                                                 | Antibacterial          |
| Dornase alfa           | B     | Homo sapiens (Hominidae)                                                                                                                                                                  | Cyctic fibrosis        |
| Dosmalfate             | ND    | Homo sapiens (Hominidae)                                                                                                                                                                  | Gastroprotectant       |
| Doxacurium chloride    | S*    | Leontice leontopetalum (Berberidaceae)                                                                                                                                                    | Muscle relaxant        |
| Doxercalciferol        | ND    | Agaricus bisporus (Agaricaceae)                                                                                                                                                           | Calcium metabolism     |
| Doxifluridine          | S*    | Homo sapiens (Hominidae)                                                                                                                                                                  | Anticancer             |
| Doxofylline            | ND    | Theobroma cacao (Malvaceae); Theobroma bicolor (Malvaceae); Theobroma angustifolium (Malvaceae); Paullinia cupana (Sapindaceae); Camellia sinensis (Theaceae); Coffea arabica (Rubiaceae) | Bronchodilator         |
| Doxorubicin            | N     | Streptomyces peucetius (Streptomycetaceae)                                                                                                                                                | Oncological disease    |
| Doxycycline            | ND    | Streptomyces rimosus (Streptomycetaceae)                                                                                                                                                  | Antibacterial          |
| Dpt vaccines           | V     | Corynebacterium diphtheriae (Corynebacteriaceae)                                                                                                                                          | DTaP                   |
| Dromostanolone         | ND    | Homo sapiens (Hominidae)                                                                                                                                                                  | Oncological disease    |
| Dronabinol             | N     | Cannabis (Cannabaceae)                                                                                                                                                                    | Antinauseant           |
| Drospirenone           | ND    | Homo sapiens (Hominidae)                                                                                                                                                                  | Contraception          |
| Drotrecogin alfa       | B     | Homo sapiens (Hominidae)                                                                                                                                                                  | Antisepsis             |
| Droxidopa              | S*/NM | Homo sapiens (Hominidae)                                                                                                                                                                  | AntiParkinsonian       |
| Dutaseride             | ND    | Homo sapiens (Hominidae)                                                                                                                                                                  | BPH                    |
| Duteplase              | B     | Homo sapiens (Hominidae)                                                                                                                                                                  | Antithrombotic         |
| Ecteinascidin          | ND    | Ecteinascidia turbinata (Perophoridae)                                                                                                                                                    | Oncological disease    |
| Efalizumab             | B     | Mus musculus (Muridae)                                                                                                                                                                    | Antipsoriatic          |
| Elcatonin              | ND    | Anguilla japonica (Anguillidae)                                                                                                                                                           | Calcium metabolism     |
| Elliptinium acetate    | ND    | Aspidosperma (Apocynaceae); Apocynaceae (Apocynaceae); Ochrosia elliptica (Apocynaceae); Tabernaemontana (Apocynaceae); Strychnos (Loganiaceae)                                           | Oncological disease    |



|                               |       |                                                                                                                      |                        |
|-------------------------------|-------|----------------------------------------------------------------------------------------------------------------------|------------------------|
| Emtricitabine                 | S*    | Human immunodeficiency virus 1 (Retroviridae); Homo sapiens (Hominidae)                                              | Antiviral              |
| Enalapril maleate             | S*/NM | Bothrops jararaca (Viperidae)                                                                                        | Cardiovascular disease |
| Enalaprilat                   | S*/NM | Bothrops jararaca (Viperidae)                                                                                        | Cardiovascular disease |
| Enfuvirtide                   | ND    | Human immunodeficiency virus 1 (Retroviridae)                                                                        | Antiviral              |
| Engerix B Hepatitis b vaccine | V     | Hepatitis B virus (Hepadnaviridae)                                                                                   | Hepatitis              |
| Enocitabine                   | S*    | Homo sapiens (Hominidae)                                                                                             | Anticancer             |
| Enoxaparin                    | ND    | Homo sapiens (Hominidae)                                                                                             | DVT; anticoagulant     |
| Enprostil                     | ND    | Larix sibirica (Pinaceae); Prunus tomentosa (Rosaceae); Populus balsamifera (Salicaceae); Manduca sexta (Sphingidae) | Antiulcer              |
| Entecavir                     | S*    | Hepatitis B virus (Hepadnaviridae); Homo sapiens (Hominidae)                                                         | Antiviral              |
| Epervudine                    | S*    | Varicellovirus (Herpesviridae); Simplexvirus (Herpesviridae); Homo sapiens (Hominidae)                               | Antiviral              |
| Ephedrine                     | N     | Ephedra sinica (Ephedraceae)                                                                                         | Inflammatory disease   |
| Epicillin                     | ND    | Aspergillus flavus (Trichocomaceae); Emericella nidulans (Trichocomaceae); Penicillium chrysogenum (Trichocomaceae)  | Antibacterial          |
| Epinephrine bitartrate        | ND    | Ephedra sinica (Ephedraceae)                                                                                         | Inflammatory disease   |
| Epipodophyllotoxin            | ND    | Dysosma pleiantha (Berberidaceae); Podophyllum peltatum (Berberidaceae); Sinopodophyllum hexandrum (Berberidaceae)   | Oncological disease    |
| Epirubicin HCl                | ND    | Streptomyces peucetius (Streptomycetaceae)                                                                           | Oncological disease    |
| Epoetin delta                 | B     | Homo sapiens (Hominidae)                                                                                             | Hematopoiesis          |
| Epoprostenol sodium           | N     | Homo sapiens (Hominidae)                                                                                             | Platelet aggreg        |
| Eprosartan                    | S/NM  | Rattus norvegicus (Muridae)                                                                                          | Antihypertensive       |
| Eptazocine HBr                | S*    | Papaver somniferum (Papaveraceae)                                                                                    | Analgesic              |
| Ergotamine                    | N     | Claviceps purpurea (Clavicipitaceae)                                                                                 | Neurological disease   |
| Eribulin mesylate             | ND    | Halichondria okadaei (Halichondriidae)                                                                               | Oncological disease    |
| Erlotinib hydrochloride       | S/NM  | Zea mays (Poaceae); Cocos nucifera (Arecaceae); Spinacia oleracea (Amaranthaceae); Pisum sativum (Fabaceae)          | Anticancer             |
| Ertapenem sodium              | ND    | Streptomyces cattleya (Streptomycetaceae)                                                                            | Antibacterial          |
| Erythromycin                  | N     | Saccharopolyspora erythraea (Pseudonocardaceae)                                                                      | Antibacterial          |
| Erythromycin acistrate        | ND    | Saccharopolyspora erythraea (Pseudonocardaceae)                                                                      | Antibacterial          |
| Erythropoietin alfa           | B     | Homo sapiens (Hominidae)                                                                                             | Erythropoiesis         |
| Erythropoietin beta           | B     | Homo sapiens (Hominidae)                                                                                             | Erythropoiesis         |
| Estramustine                  | ND    | Homo sapiens (Hominidae)                                                                                             | Antineoplastic         |
| Etanercept                    | B     | Homo sapiens (Hominidae)                                                                                             | Antiarthritic          |
| Ethanolamine oleate           | S*    | Homo sapiens (Hominidae)                                                                                             | Sclerosant             |
| Ethinyl estradiol             | ND    | Homo sapiens (Hominidae)                                                                                             | Antineoplastic         |
| Ethyl icosapentate            | ND    | Shewanella pneumatophori (Shewanellaceae); Listonella pelagia (Vibrionaceae)                                         | Antithrombotic         |

|                               |       |                                                                                                                                                                             |                                                 |
|-------------------------------|-------|-----------------------------------------------------------------------------------------------------------------------------------------------------------------------------|-------------------------------------------------|
| Etoposide phosphate           | ND    | Dysosma pleiantha (Berberidaceae); Podophyllum peltatum (Berberidaceae); Sinopodophyllum hexandrum (Berberidaceae)                                                          | Oncological disease                             |
| Eupatilin                     | N     | Artemisia argyi (Asteraceae)                                                                                                                                                | Immunological, inflammatory and related disease |
| Everolimus                    | ND    | Streptomyces hygroscopicus (Streptomycetaceae)                                                                                                                              | Anticancer                                      |
| Exemestane                    | ND    | Homo sapiens (Hominidae)                                                                                                                                                    | Anticancer                                      |
| Exenatide                     | ND    | Heloderma suspectum (Helodermatidae)                                                                                                                                        | Antidiabetic                                    |
| Exubera Pulmonary insulin     | B     | Homo sapiens (Hominidae)                                                                                                                                                    | Antidiabetic                                    |
| Falecalcitrol                 | ND    | Salmonidae (Salmonidae); Agaricus bisporus (Agaricaceae)                                                                                                                    | Sec. hyperthyroidism                            |
| Famciclovir                   | S*    | Varicellovirus (Herpesviridae); Homo sapiens (Hominidae)                                                                                                                    | Antiviral                                       |
| Farom                         | ND    | Streptomyces cattleya (Streptomycetaceae)                                                                                                                                   | Antibacterial                                   |
| Faropenem                     | ND    | Aspergillus flavus (Trichocomaceae); Emericella nidulans (Trichocomaceae); Penicillium chrysogenum (Trichocomaceae)                                                         | Antibacterial                                   |
| Femodene                      | ND    | Homo sapiens (Hominidae)                                                                                                                                                    | Contraception                                   |
| Fendrix Hepatitis B vaccine   | V     | Hepatitis B virus (Hepadnaviridae)                                                                                                                                          | Antiviral                                       |
| Fibrinogen                    | N     | Homo sapiens (Hominidae)                                                                                                                                                    | Deep vein thrombosis                            |
| Filgrastim                    | B     | Homo sapiens (Hominidae)                                                                                                                                                    | Immunostimulant                                 |
| Finasteride                   | ND    | Homo sapiens (Hominidae)                                                                                                                                                    | 5 alpha-reductase inhibitor                     |
| Fingolimod                    | ND    | Isaria (Cordycipitaceae)                                                                                                                                                    | Multiple sclerosis                              |
| Flomoxef sodium               | ND    | Acremonium chrysogenum (Acremonium); Emericellopsis minima (Emericellopsis); Amycolatopsis lactamdurans (Pseudonocardiaceae); Streptomyces clavuligerus (Streptomycetaceae) | Antibacterial                                   |
| Floxuridine                   | S*    | Streptomyces antibioticus (Streptomycetaceae); Streptomyces griseus (Streptomycetaceae); Tethya (Tethyidae)                                                                 | Oncological disease                             |
| Flucloxacillin                | ND    | Aspergillus flavus (Trichocomaceae); Emericella nidulans (Trichocomaceae); Penicillium chrysogenum (Trichocomaceae)                                                         | Antibacterial                                   |
| Fludarabine phosphate         | S*    | Homo sapiens (Hominidae)                                                                                                                                                    | Anticancer                                      |
| FluMist Influenza virus       | V     | Hepatitis A virus (Picornaviridae)                                                                                                                                          | Antiviral                                       |
| Fluorouracil                  | S*    | Streptomyces antibioticus (Streptomycetaceae); Streptomyces griseus (Streptomycetaceae); Tethya (Tethyidae)                                                                 | Oncological disease                             |
| Fluoxymesterone               | ND    | Homo sapiens (Hominidae)                                                                                                                                                    | Oncological disease                             |
| Flurithromycin ethylsuccinate | ND    | Saccharopolyspora erythraea (Pseudonocardiaceae)                                                                                                                            | Antibacterial                                   |
| Flutamide                     | ND    | Homo sapiens (Hominidae)                                                                                                                                                    | Oncological disease                             |
| Fluticasone propionate        | ND    | Homo sapiens (Hominidae)                                                                                                                                                    | Inflammatory disease                            |
| Flutropium bromide            | ND    | Atropa belladonna (Solanaceae); Datura stramonium (Solanaceae); Mandragora officinarum (Solanaceae)                                                                         | Antitussive                                     |
| Fluvastatin sodium            | S*/NM | Pseudonocardia autotrophica (Pseudonocardiaceae); Penicillium brevicompactum (Trichocomaceae); Penicillium                                                                  | Cardiovascular disease                          |

|                                 |       |                                                                                                                                                                                                                                                                     |                        |
|---------------------------------|-------|---------------------------------------------------------------------------------------------------------------------------------------------------------------------------------------------------------------------------------------------------------------------|------------------------|
|                                 |       | citrinum (Trichocomaceae)                                                                                                                                                                                                                                           |                        |
| Follitropin alfa                | B     | Homo sapiens (Hominidae)                                                                                                                                                                                                                                            | Hormone                |
| Follitropin beta                | B     | Homo sapiens (Hominidae)                                                                                                                                                                                                                                            | Hormone                |
| Fomivirsen sodium               | S*/NM | Cytomegalovirus (Herpesviridae)                                                                                                                                                                                                                                     | Antiviral              |
| Fondaparinux sodium             | ND    | Homo sapiens (Hominidae)                                                                                                                                                                                                                                            | DVT; anticoagulant     |
| Formestane                      | ND    | Homo sapiens (Hominidae)                                                                                                                                                                                                                                            | Anticancer             |
| Forteo                          | ND    | Homo sapiens (Hominidae)                                                                                                                                                                                                                                            | Osteoporosis           |
| Fosamprenavir                   | S*/NM | Actinomyces (Actinomycetaceae); Streptomyces testaceus (Streptomycetaceae); Streptomyces argenteolus subsp. toyonakensis (Streptomycetaceae)                                                                                                                        | Antiviral              |
| Fosfestrol                      | ND    | Homo sapiens (Hominidae)                                                                                                                                                                                                                                            | Anticancer             |
| Fosfomicin trometamol           | N     | Streptomyces fradiae (Streptomycetaceae)                                                                                                                                                                                                                            | Antibacterial          |
| Fosfosal                        | S*    | Salix (Salicaceae)                                                                                                                                                                                                                                                  | Analgesic              |
| Fosinopril sodium               | S*/NM | Bothrops jararaca (Viperidae)                                                                                                                                                                                                                                       | Cardiovascular disease |
| Framycetin                      | ND    | Streptomyces fradiae (Streptomycetaceae)                                                                                                                                                                                                                            | Antibacterial          |
| Frone Interferon beta           | B     | Homo sapiens (Hominidae)                                                                                                                                                                                                                                            | Antiviral              |
| Fulvestrant                     | ND    | Homo sapiens (Hominidae)                                                                                                                                                                                                                                            | Anticancer             |
| Fumagillin                      | N     | Aspergillus fumigatus (Trichocomaceae)                                                                                                                                                                                                                              | Antiparasitic          |
| Fusafungine                     | N     | Fusarium lateritium (Fusarium)                                                                                                                                                                                                                                      | Antibiotic             |
| Fusidic acid                    | N     | Fusidium griseum (Nectriaceae)                                                                                                                                                                                                                                      | Antibacterial          |
| Gabapentin                      | S*    | Homo sapiens (Hominidae)                                                                                                                                                                                                                                            | Antiepileptic          |
| Galantamine hydrobromide        | N     | Galanthus elwesii (Amaryllidaceae); Galanthus nivalis (Amaryllidaceae); Galanthus woronowii (Amaryllidaceae); Leucojum aestivum (Amaryllidaceae); Lycoris radiata (Amaryllidaceae); Lycoris squamigera (Amaryllidaceae); Narcissus pseudonarcissus (Amaryllidaceae) | Neurological disease   |
| Galsulfase                      | B     | Homo sapiens (Hominidae)                                                                                                                                                                                                                                            | Mucopolysaccharidosis  |
| Gammagard                       | B     | Homo sapiens (Hominidae)                                                                                                                                                                                                                                            | Antiviral              |
| Gamolonic acid                  | N     | Homo sapiens (Hominidae)                                                                                                                                                                                                                                            | Antiallergic           |
| Gamunex Iv human immunoglobulin | B     | Homo sapiens (Hominidae)                                                                                                                                                                                                                                            | Immunomodulator        |
| Ganciclovir                     | S*    | Cytomegalovirus (Herpesviridae); Homo sapiens (Hominidae)                                                                                                                                                                                                           | Antiviral              |
| Ganglioside GM1                 | N     | Homo sapiens (Hominidae)                                                                                                                                                                                                                                            | Antithrombotic         |
| Ganirelix acetate               | ND    | Homo sapiens (Hominidae)                                                                                                                                                                                                                                            | Ovulationi             |
| Gardasil Hpv vaccine            | V     | Human papillomavirus (Papillomaviridae)                                                                                                                                                                                                                             | Antiviral              |
| Gefitinib                       | S/NM  | Zea mays (Poaceae); Cocos nucifera (Arecaceae); Spinacia oleracea (Amaranthaceae); Pisum sativum (Fabaceae)                                                                                                                                                         | Anticancer             |
| Gemcitabine HCl                 | S*    | Homo sapiens (Hominidae)                                                                                                                                                                                                                                            | Anticancer             |
| Gemeprost                       | ND    | Allium cepa (Amaryllidaceae); Allium sativum (Amaryllidaceae); Larix sibirica (Pinaceae); Populus balsamifera (Salicaceae)                                                                                                                                          | Abortifacient          |

|                                    |    |                                                                                                                                                                                                                                                                                                                                                                                                                                                                                                                                                                                                                                                                 |                                                 |
|------------------------------------|----|-----------------------------------------------------------------------------------------------------------------------------------------------------------------------------------------------------------------------------------------------------------------------------------------------------------------------------------------------------------------------------------------------------------------------------------------------------------------------------------------------------------------------------------------------------------------------------------------------------------------------------------------------------------------|-------------------------------------------------|
| Gemtuzumab ozogamicin              | ND | Micromonospora echinospora (Micromonosporaceae)                                                                                                                                                                                                                                                                                                                                                                                                                                                                                                                                                                                                                 | Oncological disease                             |
| Gentamicin                         | N  | Micromonospora echinospora (Micromonosporaceae)                                                                                                                                                                                                                                                                                                                                                                                                                                                                                                                                                                                                                 | Antibacterial                                   |
| Gentel                             | B  | Homo sapiens (Hominidae)                                                                                                                                                                                                                                                                                                                                                                                                                                                                                                                                                                                                                                        | Vulnerary                                       |
| Gestrinone                         | ND | Homo sapiens (Hominidae)                                                                                                                                                                                                                                                                                                                                                                                                                                                                                                                                                                                                                                        | Antiprogestogenic                               |
| Gitalin                            | N  | Digitalis purpurea (Plantaginaceae)                                                                                                                                                                                                                                                                                                                                                                                                                                                                                                                                                                                                                             | Cardiovascular disease                          |
| Glatiramer acetate                 | S* | Homo sapiens (Hominidae)                                                                                                                                                                                                                                                                                                                                                                                                                                                                                                                                                                                                                                        | Multiple sclerosis                              |
| Glaucine                           | N  | Glaucium flavum (Papaveraceae)                                                                                                                                                                                                                                                                                                                                                                                                                                                                                                                                                                                                                                  | Antitussive                                     |
| Glaziovine                         | N  | Ocotea cf. glaziovii FS402 (Lauraceae)                                                                                                                                                                                                                                                                                                                                                                                                                                                                                                                                                                                                                          | Antidepressant                                  |
| GlucaGen                           | B  | Homo sapiens (Hominidae)                                                                                                                                                                                                                                                                                                                                                                                                                                                                                                                                                                                                                                        | Hormone                                         |
| Glycyrrhizin                       | N  | Glycyrrhiza glabra (Fabaceae)                                                                                                                                                                                                                                                                                                                                                                                                                                                                                                                                                                                                                                   | Sweetener, Addison's disease                    |
| Goserelin                          | ND | Homo sapiens (Hominidae)                                                                                                                                                                                                                                                                                                                                                                                                                                                                                                                                                                                                                                        | Oncological disease                             |
| Gramicidin S                       | ND | Bacillus brevis (Paenibacillaceae)                                                                                                                                                                                                                                                                                                                                                                                                                                                                                                                                                                                                                              | Antibiotic                                      |
| Griseofulvin                       | N  | Aspergillus lanosus (Trichocomaceae); Penicillium persicinum (Trichocomaceae); Penicillium jamesonlandense (Trichocomaceae); Penicillium aethiopicum (Trichocomaceae); Penicillium canescens (Trichocomaceae); Penicillium coprophilum (Trichocomaceae); Penicillium griseofulvum (Trichocomaceae); Penicillium dipodomyicola (Trichocomaceae); Penicillium janczewskii (Trichocomaceae); Penicillium janczewskii (Trichocomaceae); Penicillium lanosum (Trichocomaceae); Penicillium soppii (Trichocomaceae); Penicillium (Trichocomaceae); Penicillium (Trichocomaceae); Penicillium raistrickii (Trichocomaceae); Penicillium sclerotigenum (Trichocomaceae) | Antifungal                                      |
| Guglipid                           | N  | Commiphora wightii (Burseraceae)                                                                                                                                                                                                                                                                                                                                                                                                                                                                                                                                                                                                                                | Lipoprotein disorders                           |
| Gusperimus trihydrochloride        | ND | Brevibacillus laterosporus (Paenibacillaceae)                                                                                                                                                                                                                                                                                                                                                                                                                                                                                                                                                                                                                   | Immunological, inflammatory and related disease |
| H-101                              | B  | Human adenovirus 5 (Adenoviridae)                                                                                                                                                                                                                                                                                                                                                                                                                                                                                                                                                                                                                               | Anticancer                                      |
| Haemate HS insulin zinc suspension | B  | Homo sapiens (Hominidae)                                                                                                                                                                                                                                                                                                                                                                                                                                                                                                                                                                                                                                        | Antidiabetic                                    |
| Halobetasol propionate             | ND | Homo sapiens (Hominidae)                                                                                                                                                                                                                                                                                                                                                                                                                                                                                                                                                                                                                                        | Inflammatory disease                            |
| Halometasone                       | ND | Homo sapiens (Hominidae)                                                                                                                                                                                                                                                                                                                                                                                                                                                                                                                                                                                                                                        | Inflammatory disease                            |
| Halopredone acetate                | ND | Homo sapiens (Hominidae)                                                                                                                                                                                                                                                                                                                                                                                                                                                                                                                                                                                                                                        | Antiarthritic                                   |
| Havrix Hepatitis a vaccine         | V  | Hepatitis A virus (Picornaviridae)                                                                                                                                                                                                                                                                                                                                                                                                                                                                                                                                                                                                                              | Hepatitis                                       |
| Hemoglobin glutamer                | B  | Homo sapiens (Hominidae)                                                                                                                                                                                                                                                                                                                                                                                                                                                                                                                                                                                                                                        | Anemia                                          |
| Hemsleyadin                        | N  | Hemsleya (Cucurbitaceae)                                                                                                                                                                                                                                                                                                                                                                                                                                                                                                                                                                                                                                        | Antibacterial                                   |
| Hepacure Hepatitis b vaccine       | V  | Hepatitis B virus (Hepadnaviridae)                                                                                                                                                                                                                                                                                                                                                                                                                                                                                                                                                                                                                              | Hepatitis                                       |
| HepaGam B                          | V  | Hepatitis B virus (Hepadnaviridae)                                                                                                                                                                                                                                                                                                                                                                                                                                                                                                                                                                                                                              | Hepatitis B                                     |
| Heparin sodium                     | N  | Homo sapiens (Hominidae)                                                                                                                                                                                                                                                                                                                                                                                                                                                                                                                                                                                                                                        | Anticoagulant                                   |

|                                      |       |                                                                                                                                                                    |                            |
|--------------------------------------|-------|--------------------------------------------------------------------------------------------------------------------------------------------------------------------|----------------------------|
| Hesperetin                           | N     | Citrus bergamia (Rutaceae); Citrus limon (Rutaceae)                                                                                                                | Cardiovascular disease     |
| Hesperidin                           | N     | Citrus (Rutaceae)                                                                                                                                                  | Capillary fragility        |
| Hexavac<br>Hexavalent vaccine        | V     | Corynebacterium diphtheriae (Corynebacteriaceae);<br>Hepatitis B virus (Hepadnaviridae); Haemophilus influenzae<br>(Pasteurellaceae); Enterovirus (Picornaviridae) | Dpt and others             |
| Hexyl<br>aminolevulinate             | ND    | Homo sapiens (Hominidae)                                                                                                                                           | Anticancer                 |
| Hibitek H<br>influenzae b<br>vaccine | V     | Haemophilus influenzae (Pasteurellaceae)                                                                                                                           | Antibacterial              |
| Hidrosmin                            | ND    | Melilotus albus (Fabaceae); Melilotus officinalis (Fabaceae);<br>Penicillium janczewskii (Trichocomaceae); Penicillium<br>jensenii (Trichocomaceae)                | Cardiovascular disease     |
| Hirulog                              | ND    | Haementeria officinalis (Glossiphoniidae); Hirudo<br>medicinalis (Hirudinidae)                                                                                     | Anticoagulation            |
| Histrelin                            | ND    | Homo sapiens (Hominidae)                                                                                                                                           | Central precocious puberty |
| Humalog Insulin<br>lispro            | B     | Homo sapiens (Hominidae)                                                                                                                                           | Antidiabetic               |
| Human factor VIII                    | B     | Homo sapiens (Hominidae)                                                                                                                                           | Hemophilia                 |
| Humatrope<br>Somatropin              | B     | Homo sapiens (Hominidae)                                                                                                                                           | Hormone                    |
| Huperzine                            | N     | Huperzia serrata (Lycopodiaceae)                                                                                                                                   | Neurological disease       |
| Hyaluronate<br>sodium                | B     | Homo sapiens (Hominidae)                                                                                                                                           | Joint lubricant            |
| Hydrastine                           | N     | Hydrastis canadensis (Ranunculaceae)                                                                                                                               | Haemostatic, Astringent    |
| Hydrocortisone<br>aceponate          | ND    | Homo sapiens (Hominidae)                                                                                                                                           | Inflammatory disease       |
| Hydrocortisone<br>butyrate           | ND    | Homo sapiens (Hominidae)                                                                                                                                           | Inflammatory disease       |
| Hydroxyprogesterone                  | ND    | Homo sapiens (Hominidae)                                                                                                                                           | Oncological disease        |
| Hylenex                              | B     | Homo sapiens (Hominidae)                                                                                                                                           | Reproduction               |
| Hyoscyamine                          | N     | Hyoscyamus niger (Solanaceae)                                                                                                                                      | Anticholinergic            |
| Ibopamine HCl                        | ND    | Homo sapiens (Hominidae)                                                                                                                                           | Cardiotonic                |
| Ibritumomab                          | B     | Homo sapiens (Hominidae)                                                                                                                                           | Anticancer                 |
| Idarubicin<br>hydrochloride          | ND    | Streptomyces coeruleorubidus (Streptomycetaceae);<br>Streptomyces peucetius (Streptomycetaceae)                                                                    | Oncological disease        |
| Iloprost                             | ND    | Homo sapiens (Hominidae)                                                                                                                                           | Platelet aggreg. inhib.    |
| Imatinib mesilate                    | ND    | Lentzea albida (Actinosynnemataceae); Lentzea albida<br>(Actinosynnemataceae); Lentzea albida<br>(Actinosynnemataceae)                                             | Anticancer                 |
| Imidapril HCL                        | S*/NM | Bothrops jararaca (Viperidae)                                                                                                                                      | Cardiovascular disease     |
| Imiglucerase                         | B     | Homo sapiens (Hominidae)                                                                                                                                           | Gaucher's disease          |
| Imipenem                             | ND    | Streptomyces cattleya (Streptomycetaceae)                                                                                                                          | Antibacterial              |
| Indinavir sulfate                    | S*/NM | Actinomyces (Actinomycetaceae); Streptomyces testaceus<br>(Streptomycetaceae); Streptomyces argenteolus subsp.<br>toyonakensis (Streptomycetaceae)                 | Antiviral                  |
| Indoramin HCL                        | S*    | Glycine max (Fabaceae)                                                                                                                                             | Antihypertensive           |
| Infanrix HeXa                        | V     | Corynebacterium diphtheriae (Corynebacteriaceae);                                                                                                                  | Dpt and others             |

|                                  |      |                                                                                                                                                                                                                          |                           |
|----------------------------------|------|--------------------------------------------------------------------------------------------------------------------------------------------------------------------------------------------------------------------------|---------------------------|
| Hexavalent vaccine               |      | Hepatitis B virus (Hepadnaviridae); Haemophilus influenzae (Pasteurellaceae); Enterovirus (Picornaviridae)                                                                                                               |                           |
| Infergen Interferon alfacon-1    | B    | Homo sapiens (Hominidae)                                                                                                                                                                                                 | Antiviral                 |
| Infliximab                       | B    | Homo sapiens (Hominidae)                                                                                                                                                                                                 | Crohn's disease           |
| Inosine pranobex                 | S*   | Morbillivirus (Paramyxoviridae); Homo sapiens (Hominidae)                                                                                                                                                                | Antiviral                 |
| Insulin aspart                   | B    | Homo sapiens (Hominidae)                                                                                                                                                                                                 | Antidiabetic              |
| Interleukin-2                    | B    | Homo sapiens (Hominidae)                                                                                                                                                                                                 | Anticancer                |
| Intron-A Interferon alfa2b       | B    | Homo sapiens (Hominidae)                                                                                                                                                                                                 | Anticancer                |
| Invivac Influenza vaccine        | V    | Hepatitis A virus (Picornaviridae); Hepatitis B virus (Hepadnaviridae)                                                                                                                                                   | Antiviral                 |
| Ipratropium                      | ND   | Atropa belladonna (Solanaceae); Datura stramonium (Solanaceae); Mandragora officinarum (Solanaceae)                                                                                                                      | Anticholinergic           |
| Ipriflavone                      | ND   | Fabaceae (Fabaceae)                                                                                                                                                                                                      | Calcium metabolism        |
| Irbesartan                       | S/NM | Rattus norvegicus (Muridae)                                                                                                                                                                                              | Antihypertensive          |
| Irinotecan hydrochloride         | ND   | Mappia foetida (Icacinaceae); Camptotheca acuminata (Cornaceae); Ophiorrhiza pumila (Rubiaceae)                                                                                                                          | Oncological disease       |
| Isepamicin                       | ND   | Micromonospora echinospora (Micromonosporaceae)                                                                                                                                                                          | Antibacterial             |
| Isophane insulin                 | B    | Homo sapiens (Hominidae)                                                                                                                                                                                                 | Antidiabetic              |
| Isoprenaline                     | ND   | Ephedra sinica (Ephedraceae); Acacia rigidula (Fabaceae); Senegalia berlandieri (Fabaceae)                                                                                                                               | Cardiovascular disease    |
| Isotretinoin                     | ND   | Daucus carota (Apiaceae)                                                                                                                                                                                                 | Antiacne                  |
| Ivermectin                       | N    | Streptomyces avermitilis (Streptomycetaceae)                                                                                                                                                                             | Antiparasitic             |
| Ixabepilone                      | ND   | Sorangium cellulosum (Polyangiaceae)                                                                                                                                                                                     | Oncological disease       |
| Josamycin                        | N    | Streptomyces narbonensis (Streptomycetaceae)                                                                                                                                                                             | Antibacterial             |
| Kanamycin                        | N    | Streptomyces kanamyceticus (Streptomycetaceae)                                                                                                                                                                           | Antibacterial             |
| Kawain                           | N    | Piper methysticum (Piperaceae)                                                                                                                                                                                           | Cardiovascular disease    |
| Khellin                          | N    | Ammi (Apiaceae)                                                                                                                                                                                                          | Bronchodilator            |
| Kinetin                          | S*   | Nicotiana tabacum (Solanaceae)                                                                                                                                                                                           | Skin photodamage          |
| Kogenate Recombinant factor VIII | B    | Homo sapiens (Hominidae)                                                                                                                                                                                                 | Hemophilia                |
| Kunecatechins                    | NB   | Camellia sinensis (Theaceae)                                                                                                                                                                                             | Anticancer                |
| Lamivudine                       | S*   | Human immunodeficiency virus 1 (Retroviridae); Homo sapiens (Hominidae)                                                                                                                                                  | Antiviral                 |
| Lanatoside A                     | N    | Digitalis lanata (Plantaginaceae)                                                                                                                                                                                        | Cardiovascular disease    |
| Lanatoside B                     | N    | Digitalis lanata (Plantaginaceae)                                                                                                                                                                                        | Cardiovascular disease    |
| Lanatoside C                     | N    | Digitalis lanata (Plantaginaceae)                                                                                                                                                                                        | Cardiovascular disease    |
| Lanreotide acetate               | ND   | Homo sapiens (Hominidae)                                                                                                                                                                                                 | Growth hormone deficiency |
| Lantus Insulin glargine          | B    | Homo sapiens (Hominidae)                                                                                                                                                                                                 | Antidiabetic              |
| Lapatinib                        | S/NM | Zea mays (Poaceae); Cocos nucifera (Arecaceae); Spinacia oleracea (Amaranthaceae); Pisum sativum (Fabaceae); Zea mays (Poaceae); Cocos nucifera (Arecaceae); Spinacia oleracea (Amaranthaceae); Pisum sativum (Fabaceae) | Anticancer                |

|                             |       |                                                                                                                                                                             |                                                 |
|-----------------------------|-------|-----------------------------------------------------------------------------------------------------------------------------------------------------------------------------|-------------------------------------------------|
| Laronidase                  | B     | Homo sapiens (Hominidae)                                                                                                                                                    | Mucopolysaccharidosis                           |
| Latanoprost                 | ND    | Allium sativum (Amaryllidaceae); Artemisia dracunculus (Asteraceae); Manduca sexta (Sphingidae)                                                                             | Antiglaucoma                                    |
| L-Dopa                      | N     | Mucuna pruriens var. utilis (Fabaceae)                                                                                                                                      | Neurological disease                            |
| Lenampicillin HCL           | ND    | Aspergillus flavus (Trichocomaceae); Emericella nidulans (Trichocomaceae); Penicillium chrysogenum (Trichocomaceae)                                                         | Antibacterial                                   |
| Lenogastrim                 | B     | Homo sapiens (Hominidae)                                                                                                                                                    | Hematopoiesis                                   |
| Lentinan                    | N     | Lentinula edodes (Marasmiaceae)                                                                                                                                             | Oncological disease                             |
| Lepirudin                   | ND    | Haementeria officinalis (Glossiphoniidae); Hirudo medicinalis (Hirudinidae)                                                                                                 | Antithrombotic                                  |
| Leuprolide acetate          | ND    | Homo sapiens (Hominidae)                                                                                                                                                    | Oncological disease                             |
| Levacecarnine HCL           | ND    | Homo sapiens (Hominidae)                                                                                                                                                    | Nootropic                                       |
| Levalbuterol HCL            | S*/NM | Ephedra sinica (Ephedraceae)                                                                                                                                                | Inflammatory disease                            |
| Levemir Insulin detemir     | B     | Homo sapiens (Hominidae)                                                                                                                                                    | Antidiabetic                                    |
| Levodopa                    | N     | Mucuna pruriens (Fabaceae)                                                                                                                                                  | Dietary supplement                              |
| Levo-THP                    | N     | Corydalis ambigua (Papaveraceae); Stephania rotunda (Menispermaceae)                                                                                                        | Immunological, inflammatory and related disease |
| Levulan                     | N     | Homo sapiens (Hominidae)                                                                                                                                                    | Actinic keratoses                               |
| Limaprost                   | ND    | Allium cepa (Amaryllidaceae); Allium sativum (Amaryllidaceae); Larix sibirica (Pinaceae); Populus balsamifera (Salicaceae)                                                  | Antithrombotic                                  |
| Lincomycin                  | N     | Streptomyces lincolnensis (Streptomycetaceae)                                                                                                                               | Antibacterial                                   |
| Liraglutide                 | ND    | Homo sapiens (Hominidae)                                                                                                                                                    | Anti-diabetes                                   |
| Lisdexamfetamine dimesylate | N     | Ephedra sinica (Ephedraceae); Senegalia berlandieri (Fabaceae)                                                                                                              | ADHD                                            |
| Lisinopril                  | S*/NM | Bothrops jararaca (Viperidae)                                                                                                                                               | Cardiovascular disease                          |
| Lisuride maleate            | ND    | Claviceps (Clavicipitaceae)                                                                                                                                                 | Antihyperprolactinemia                          |
| Logiparin Lmw heparin       | ND    | Homo sapiens (Hominidae)                                                                                                                                                    | Anticoagulant                                   |
| Lomustine                   | S     | Streptomyces achromogenes (Streptomycetaceae)                                                                                                                               | Anticancer                                      |
| Lopinavir                   | S*/NM | Actinomyces (Actinomycetaceae); Streptomyces testaceus (Streptomycetaceae); Streptomyces argenteolus subsp. toyonakensis (Streptomycetaceae)                                | Antiviral                                       |
| Loracarbef                  | ND    | Acremonium chrysogenum (Acremonium); Emericellopsis minima (Emericellopsis); Amycolatopsis lactamdurans (Pseudonocardiaceae); Streptomyces clavuligerus (Streptomycetaceae) | Antibacterial                                   |
| Losartan potassium          | S/NM  | Rattus norvegicus (Muridae)                                                                                                                                                 | Antihypertensive                                |
| Loteprednol etabonate       | ND    | Homo sapiens (Hominidae)                                                                                                                                                    | Inflammatory disease                            |
| Lovastatin                  | N     | Aspergillus terreus (Trichocomaceae)                                                                                                                                        | Cardiovascular disease                          |
| Lubiprostone                | ND    | Allium cepa (Amaryllidaceae); Allium sativum (Amaryllidaceae); Larix sibirica (Pinaceae); Populus balsamifera (Salicaceae)                                                  | Chronic idiopathic constipation                 |
| Lunelle                     | ND    | Homo sapiens (Hominidae)                                                                                                                                                    | Contraception                                   |

|                                 |      |                                                                                                                                                              |                           |
|---------------------------------|------|--------------------------------------------------------------------------------------------------------------------------------------------------------------|---------------------------|
| Lutropin alfa                   | B    | Homo sapiens (Hominidae)                                                                                                                                     | Hormone                   |
| Lymecycline                     | ND   | Streptomyces aureofaciens (Streptomycetaceae); Streptomyces viridifaciens (Streptomycetaceae)                                                                | Antibacterial             |
| Maraviroc                       | S/NM | Homo sapiens (Hominidae)                                                                                                                                     | Antiviral                 |
| Marvelon                        | ND   | Homo sapiens (Hominidae)                                                                                                                                     | Contraception             |
| Masoprocol                      | N    | Larrea tridentata (Zygophyllaceae)                                                                                                                           | Oncological disease       |
| Mearubik                        | V    | Morbillivirus (Paramyxoviridae); Rubella virus (Togaviridae)                                                                                                 | Antiviral                 |
| Mecasermin                      | B    | Homo sapiens (Hominidae)                                                                                                                                     | Pituitary disorders       |
| Mecillinam                      | ND   | Aspergillus flavus (Trichocomaceae); Emericella nidulans (Trichocomaceae); Penicillium chrysogenum (Trichocomaceae)                                          | Antibacterial             |
| Medroxyprogesterone acetate     | ND   | Homo sapiens (Hominidae)                                                                                                                                     | Oncological disease       |
| Mefloquine HCl                  | ND   | Cinchona officinalis (Rubiaceae)                                                                                                                             | Antiparasitic             |
| Megesterol acetate              | ND   | Homo sapiens (Hominidae)                                                                                                                                     | Anticancer                |
| Megestrol acetate               | ND   | Homo sapiens (Hominidae)                                                                                                                                     | Oncological disease       |
| Meinyu Hepatitis b vaccine      | V    | Hepatitis B virus (Hepadnaviridae)                                                                                                                           | Hepatitis                 |
| Melanoma theraccine             | V    | Homo sapiens (Hominidae)                                                                                                                                     | Anticancer                |
| Melevodopa                      | ND   | Mucuna pruriens (Fabaceae)                                                                                                                                   | Neurological disease      |
| Menactra                        | V    | Neisseria meningitidis (Neisseriaceae); Haemophilus influenzae (Pasteurellaceae); Streptococcus pneumoniae (Streptococcaceae); Mumps virus (Paramyxoviridae) | Antibacterial             |
| Mencevax                        | V    | Neisseria meningitidis (Neisseriaceae)                                                                                                                       | Antibacterial             |
| Menigetek Meningococcal vaccine | V    | Neisseria meningitidis (Neisseriaceae)                                                                                                                       | Antibacterial             |
| Meningitis b vaccine            | V    | Haemophilus influenzae (Pasteurellaceae)                                                                                                                     | Antibacterial             |
| Menjugate Meningococcal vaccine | V    | Neisseria meningitidis (Neisseriaceae)                                                                                                                       | Antibacterial             |
| Menotropins                     | N    | Homo sapiens (Hominidae)                                                                                                                                     | Growth hormone deficiency |
| Menthol                         | N    | Mentha spicata (Lamiaceae)                                                                                                                                   | Rubefacient               |
| Mercaptopurine                  | S*   | Homo sapiens (Hominidae)                                                                                                                                     | Oncological disease       |
| Merieux Varicella Vaccine       | V    | Human herpesvirus 3 (Herpesviridae)                                                                                                                          | Antiviral                 |
| Meropenem                       | ND   | Streptomyces cattleya (Streptomycetaceae)                                                                                                                    | Antibacterial             |
| Metergolin                      | ND   | Turbina corymbosa (Convolvulaceae); Ipomoea violacea (Convolvulaceae)                                                                                        | Antihyperprolactinemia    |
| Methacycline                    | ND   | Streptomyces rimosus (Streptomycetaceae)                                                                                                                     | Antibacterial             |
| Methamphetamine                 | ND   | Ephedra sinica (Ephedraceae); Acacia rigidula (Fabaceae); Senegalia berlandieri (Fabaceae)                                                                   | Neurological disease      |
| Methotrexate                    | S*   | Homo sapiens (Hominidae)                                                                                                                                     | Oncological disease       |
| Methylmorphine                  | N    | Papaver bracteatum (Papaveraceae); Papaver somniferum (Papaveraceae)                                                                                         | Neurological disease      |



|                                 |       |                                                                                                                                             |                                                 |
|---------------------------------|-------|---------------------------------------------------------------------------------------------------------------------------------------------|-------------------------------------------------|
| Methylprednisolone              | ND    | Homo sapiens (Hominidae)                                                                                                                    | Oncological disease                             |
| Methyltestosterone              | ND    | Homo sapiens (Hominidae)                                                                                                                    | Oncological disease                             |
| Meticillin                      | ND    | Aspergillus flavus (Trichocomaceae); Emericella nidulans (Trichocomaceae); Penicillium chrysogenum (Trichocomaceae)                         | Antibacterial                                   |
| Metoprolol tartrate             | ND    | Ephedra sinica (Ephedraceae); Acacia rigidula (Fabaceae); Senegalia berlandieri (Fabaceae)                                                  | Cardiovascular disease                          |
| Metvix                          | ND    | Homo sapiens (Hominidae)                                                                                                                    | Actinic keratoses                               |
| Mezlocillin                     | ND    | Aspergillus flavus (Trichocomaceae); Emericella nidulans (Trichocomaceae); Penicillium chrysogenum (Trichocomaceae)                         | Antibacterial                                   |
| Micafungin sodium               | ND    | Coleophoma empetri (Coleophoma)                                                                                                             | Antifungal                                      |
| Micronomicin sulfate            | N     | Micromonospora sagamiensis (Micromonosporaceae)                                                                                             | Antibacterial                                   |
| Midecamycin                     | N     | Streptomyces mycarofaciens (Streptomycetaceae)                                                                                              | Antibiotic                                      |
| Mifepristone                    | ND    | Homo sapiens (Hominidae)                                                                                                                    | Abortifacient                                   |
| Miglitol                        | ND    | Morus alba (Moraceae); Streptomyces (Streptomycetaceae); Streptomyces lavendulae (Streptomycetaceae); Lendenfeldia chondrodes (Thorectidae) | Cardiovascular disease                          |
| Miglustat                       | ND    | Morus alba (Moraceae); Streptomyces lavendulae (Streptomycetaceae); Lendenfeldia chondrodes (Thorectidae)                                   | Cardiovascular disease                          |
| Minocycline HCL                 | ND    | Streptomyces aureofaciens (Streptomycetaceae); Streptomyces viridifaciens (Streptomycetaceae)                                               | Antibacterial                                   |
| Miokamycin                      | ND    | Streptomyces mycarofaciens (Streptomycetaceae)                                                                                              | Antibacterial                                   |
| Mirimostim                      | B     | Homo sapiens (Hominidae)                                                                                                                    | Hematopoiesis                                   |
| Misoprostol                     | ND    | Allium cepa (Amaryllidaceae); Allium sativum (Amaryllidaceae); Larix sibirica (Pinaceae); Populus balsamifera (Salicaceae)                  | Antiulcer                                       |
| Mithramycin                     | N     | Streptomyces argillaceus (Streptomycetaceae)                                                                                                | Anticancer                                      |
| Mitomycin C                     | N     | Streptomyces caespitosus (Streptomycetaceae); Streptomyces lavendulae (Streptomycetaceae)                                                   | Oncological disease                             |
| Mitoxantrone HCL                | S*    | Streptomyces peucetius (Streptomycetaceae)                                                                                                  | Oncological disease                             |
| Mivacurium chloride             | S*    | Leontice leontopetalum (Berberidaceae)                                                                                                      | Muscle relaxant                                 |
| Mizoribine                      | N     | Eupenicillium brefeldianum (Trichocomaceae)                                                                                                 | Immunological, inflammatory and related disease |
| Mobenakin                       | B     | Homo sapiens (Hominidae)                                                                                                                    | Anticancer                                      |
| Moexipril HCL                   | S*/NM | Bothrops jararaca (Viperidae)                                                                                                               | Cardiovascular disease                          |
| Molgramostim                    | B     | Homo sapiens (Hominidae)                                                                                                                    | Hematopoiesis                                   |
| Mometasone furoate              | ND    | Homo sapiens (Hominidae)                                                                                                                    | Inflammatory disease                            |
| Monoclate-P Factor VIII         | B     | Homo sapiens (Hominidae)                                                                                                                    | Hemophilia                                      |
| Monoclonal antibody 131 I-chTNT | B     | Homo sapiens (Hominidae)                                                                                                                    | Anticancer                                      |
| Monocrotaline                   | N     | Crotalaria (Fabaceae)                                                                                                                       | Oncological disease                             |

|                            |       |                                                                                                                                                                                                                                                                                            |                                                 |
|----------------------------|-------|--------------------------------------------------------------------------------------------------------------------------------------------------------------------------------------------------------------------------------------------------------------------------------------------|-------------------------------------------------|
| Monteplase                 | B     | Homo sapiens (Hominidae)                                                                                                                                                                                                                                                                   | Antithrombotic                                  |
| Moroctocog alfa            | B     | Homo sapiens (Hominidae)                                                                                                                                                                                                                                                                   | Hemophilia                                      |
| Morphine sulfate           | ND    | Papaver somniferum (Papaveraceae); Poaceae (Poaceae); Asteraceae (Asteraceae)                                                                                                                                                                                                              | Neurological disease                            |
| Moxalactam disodium        | ND    | Amycolatopsis lactamdurans (Pseudonocardiaceae); Streptomyces cattleya (Streptomycetaceae); Streptomyces clavuligerus (Streptomycetaceae)                                                                                                                                                  | Antibacterial                                   |
| Mupirocin                  | N     | Pseudomonas fluorescens (Pseudomonadaceae)                                                                                                                                                                                                                                                 | Antibacterial                                   |
| Muromonab-CD3              | B     | Homo sapiens (Hominidae)                                                                                                                                                                                                                                                                   | Immunosuppressant                               |
| Mycophenolate mofetil      | ND    | Aspergillus unilateralis (Trichocomaceae); Byssoschlamys nivea (Trichocomaceae); Penicillium bialowiezense (Trichocomaceae); Penicillium brevicompactum (Trichocomaceae); Penicillium carneum (Trichocomaceae); Penicillium fagi (Trichocomaceae); Penicillium roqueforti (Trichocomaceae) | Immunological, inflammatory and related disease |
| Mycophenolic acid          | N     | Aspergillus unilateralis (Trichocomaceae); Byssoschlamys nivea (Trichocomaceae); Penicillium bialowiezense (Trichocomaceae); Penicillium brevicompactum (Trichocomaceae); Penicillium carneum (Trichocomaceae); Penicillium fagi (Trichocomaceae); Penicillium roqueforti (Trichocomaceae) | Immunological, inflammatory and related disease |
| Nabilone                   | ND    | Cannabis sativa (Cannabaceae)                                                                                                                                                                                                                                                              | Neurological disease                            |
| Nadrolone phenylpropionate | N     | Homo sapiens (Hominidae)                                                                                                                                                                                                                                                                   | Anticancer                                      |
| Nadroparin calcium         | ND    | Homo sapiens (Hominidae)                                                                                                                                                                                                                                                                   | Anticoagulant                                   |
| Naemis                     | ND    | Homo sapiens (Hominidae)                                                                                                                                                                                                                                                                   | Hormone replacement therapy                     |
| Nafarelin acetate          | ND    | Homo sapiens (Hominidae)                                                                                                                                                                                                                                                                   | Precocious puberty and endometriosis            |
| Nafcillin                  | ND    | Aspergillus flavus (Trichocomaceae); Emericella nidulans (Trichocomaceae); Penicillium chrysogenum (Trichocomaceae)                                                                                                                                                                        | Antibacterial                                   |
| Nalbuphine                 | ND    | Papaver bracteatum (Papaveraceae); Papaver somniferum (Papaveraceae)                                                                                                                                                                                                                       | Neurological disease                            |
| Nalmefene HCL              | ND    | Papaver bracteatum (Papaveraceae); Papaver somniferum (Papaveraceae)                                                                                                                                                                                                                       | Neurological disease                            |
| Naloxone                   | ND    | Papaver bracteatum (Papaveraceae); Papaver somniferum (Papaveraceae)                                                                                                                                                                                                                       | Neurological disease                            |
| Naltrexone HCl             | ND    | Papaver bracteatum (Papaveraceae); Papaver somniferum (Papaveraceae)                                                                                                                                                                                                                       | Neurological disease                            |
| Nandrolone phenpropionate  | ND    | Homo sapiens (Hominidae)                                                                                                                                                                                                                                                                   | Oncological disease                             |
| Nartograstim               | B     | Homo sapiens (Hominidae)                                                                                                                                                                                                                                                                   | Hematopoiesis                                   |
| Natalizumab                | B     | Mus musculus (Muridae)                                                                                                                                                                                                                                                                     | Multiple sclerosis                              |
| Natamycin                  | N     | Streptomyces natalensis (Streptomycetaceae)                                                                                                                                                                                                                                                | Antifungal                                      |
| Nateglinide                | S*    | Homo sapiens (Hominidae)                                                                                                                                                                                                                                                                   | Antidiabetic                                    |
| Nateplase                  | B     | Homo sapiens (Hominidae)                                                                                                                                                                                                                                                                   | Antithrombotic                                  |
| Nedocromil sodium          | ND    | Marsdenieae (Apocynaceae)                                                                                                                                                                                                                                                                  | Antiallergic                                    |
| Neflinavir mesylate        | S*/NM | Actinomyces (Actinomycetaceae); Streptomyces testaceus                                                                                                                                                                                                                                     | Antiviral                                       |

|                                 |      |                                                                                                  |                                                 |
|---------------------------------|------|--------------------------------------------------------------------------------------------------|-------------------------------------------------|
|                                 |      | (Streptomycetaceae); Streptomyces argenteolus subsp. toyonakensis (Streptomycetaceae)            |                                                 |
| NeisVac-C Meningococcal vaccine | V    | Neisseria meningitidis (Neisseriaceae)                                                           | Antibacterial                                   |
| Nelarabine                      | S*   | Homo sapiens (Hominidae)                                                                         | Anticancer                                      |
| Neoandrographolide              | N    | Andrographis paniculata (Acanthaceae)                                                            | Antibacterial                                   |
| Neocarzinostatin                | N    | Streptomyces carzinostaticus (Streptomycetaceae)                                                 | Oncological disease                             |
| Neomycin                        | N    | Streptomyces fradiae (Streptomycetaceae)                                                         | Antibacterial                                   |
| Nesiritide                      | ND   | Homo sapiens (Hominidae)                                                                         | Congestive heart failure                        |
| Netilmicin sulfate              | ND   | Micromonospora inyonensis (Micromonosporaceae)                                                   | Antibacterial                                   |
| Nicorandil                      | ND   | Oryza sativa (Poaceae)                                                                           | Vasodilator, coronary                           |
| Nicotine                        | N    | Nicotiana tabacum (Solanaceae); Asclepias syriaca (Apocynaceae); Lycopodium spp. (Lycopodiaceae) | Insecticide                                     |
| Nilotinib                       | ND   | Lentzea albida (Actinosynnemataceae); Lentzea albida (Actinosynnemataceae)                       | Anticancer                                      |
| Nimotuzumab                     | B    | Mus musculus (Muridae)                                                                           | Anticancer                                      |
| Nitisinone                      | ND   | Callistemon citrinus (Myrtaceae); Leptospermum (Myrtaceae)                                       | Antityrosinaemia                                |
| Nomegestrol acetate             | ND   | Homo sapiens (Hominidae)                                                                         | Progestogen                                     |
| Nordihydroguaiaretic acid       | N    | Larrea divaricata (Zygophyllaceae)                                                               | Antioxidant                                     |
| Norditropin Somatropin          | B    | Homo sapiens (Hominidae)                                                                         | Hormone                                         |
| Norethindrone acetate           | ND   | Homo sapiens (Hominidae)                                                                         | Oncological disease                             |
| Norgestimate                    | ND   | Homo sapiens (Hominidae)                                                                         | Progestogen                                     |
| Nor-pseudoephedrine             | N    | Ephedra sinica (Ephedraceae)                                                                     | Immunological, inflammatory and related disease |
| Noscapine                       | N    | Papaver somniferum (Papaveraceae)                                                                | Antitussive                                     |
| Novact M Factor IX              | B    | Homo sapiens (Hominidae)                                                                         | Hemophilia                                      |
| Novobiocin                      | N    | Streptomyces caeruleus (Streptomycetaceae)                                                       | Antibacterial                                   |
| Novolin R neutral insulin       | B    | Homo sapiens (Hominidae)                                                                         | Antidiabetic                                    |
| NovoMix 30                      | B    | Homo sapiens (Hominidae)                                                                         | Antidiabetic                                    |
| NovoSeven Factor VIIa           | B    | Homo sapiens (Hominidae)                                                                         | Hemophilia                                      |
| NuvaRing                        | ND   | Homo sapiens (Hominidae)                                                                         | Contraception                                   |
| Nystatin                        | N    | Streptomyces noursei (Streptomycetaceae)                                                         | Antifungal                                      |
| Octin                           | B    | Homo sapiens (Hominidae)                                                                         | Anticancer                                      |
| Octreotide                      | ND   | Homo sapiens (Hominidae)                                                                         | Antisecretory                                   |
| OGamma100 Interferon gamma-n1   | B    | Homo sapiens (Hominidae)                                                                         | Antifungal                                      |
| Olmesartan                      | S/NM | Rattus norvegicus (Muridae)                                                                      | Antihypertensive                                |

|                             |    |                                                                                                                                                                              |                            |
|-----------------------------|----|------------------------------------------------------------------------------------------------------------------------------------------------------------------------------|----------------------------|
| medoxil                     |    |                                                                                                                                                                              |                            |
| Omalizumab                  | B  | Mus musculus (Muridae)                                                                                                                                                       | Antiasthmatic              |
| Omega-conotoxin MVIIA       | N  | Conus geographus (Conidae); Conus magus (Conidae)                                                                                                                            | Neurological disease       |
| Oncaspar                    | B  | Escherichia coli (Enterobacteriaceae); Erwinia chrysanthemi (Enterobacteriaceae)                                                                                             | Anticancer                 |
| Ontak                       | B  | Homo sapiens (Hominidae)                                                                                                                                                     | Anticancer                 |
| Oprelvekin                  | B  | Homo sapiens (Hominidae)                                                                                                                                                     | Thrombocytopenia           |
| Oral cholera vaccine        | V  | Vibrio cholerae (Vibrionaceae)                                                                                                                                               | Antibacterial              |
| Oral-lyn Oral insulin       | B  | Homo sapiens (Hominidae)                                                                                                                                                     | Antidiabetic               |
| Orencia                     | B  | Homo sapiens (Hominidae)                                                                                                                                                     | Antiarthritic              |
| Orlistat                    | ND | Streptomyces toxytricini (Streptomycetaceae)                                                                                                                                 | Cardiovascular disease     |
| Ornoprostil                 | ND | Allium cepa (Amaryllidaceae); Allium sativum (Amaryllidaceae); Larix sibirica (Pinaceae); Populus balsamifera (Salicaceae)                                                   | Antiulcer                  |
| Ortho evra                  | ND | Homo sapiens (Hominidae)                                                                                                                                                     | Contraception              |
| Orthokine                   | B  | Homo sapiens (Hominidae)                                                                                                                                                     | Antiarthritic              |
| Osteonina Salmon calcitonin | B  | Salmonidae (Salmonidae)                                                                                                                                                      | Osteoporosis               |
| Ouabain                     | N  | Acokanthera oblongifolia (Apocynaceae); Acokanthera oppositifolia (Apocynaceae); Strophanthus gratus (Apocynaceae)                                                           | Cardiovascular disease     |
| Oxacillin sodium            | ND | Aspergillus flavus (Trichocomaceae); Emericella nidulans (Trichocomaceae); Penicillium chrysogenum (Trichocomaceae)                                                          | Antibacterial              |
| Oxitropium bromide          | ND | Datura metel (Solanaceae)                                                                                                                                                    | Bronchodilator             |
| Oxycodone HCl               | ND | Papaver bracteatum (Papaveraceae); Papaver somniferum (Papaveraceae)                                                                                                         | Neurological disease       |
| Oxymorphone                 | ND | Papaver bracteatum (Papaveraceae); Papaver somniferum (Papaveraceae)                                                                                                         | Neurological disease       |
| Oxytetracycline             | N  | Streptomyces rimosus (Streptomycetaceae)                                                                                                                                     | Antibacterial              |
| Pachycarpine                | N  | Sophora pachycarpa (Fabaceae)                                                                                                                                                | Oxytocic                   |
| Paclitaxel                  | N  | Taxus wallichiana (Taxaceae); Taxus brevifolia (Taxaceae); Taxus baccata (Taxaceae); Corylus avellana (Betulaceae); Seimatoantlerium tepuiense (Amphisphaeriaceae)           | Oncological disease        |
| Palifermin                  | B  | Homo sapiens (Hominidae)                                                                                                                                                     | Mucositis                  |
| Palivizumab                 | B  | Mus musculus (Muridae)                                                                                                                                                       | Antiviral                  |
| Palmatine                   | N  | Coptis japonica (Ranunculaceae)                                                                                                                                              | Antipyretic, Detoxicant    |
| Pamiteplase                 | B  | Homo sapiens (Hominidae)                                                                                                                                                     | Antithrombotic             |
| Panitumumab                 | B  | Homo sapiens (Hominidae)                                                                                                                                                     | Anticancer                 |
| Panorex                     | B  | Mus musculus (Muridae)                                                                                                                                                       | Adjuvant/colorectal cancer |
| Pansporin                   | ND | Acremonium chrysogenum (Acremonium); Emericellopsis minima (Emericellopsis); Amycolatopsis lactamdurans (Pseudonocardiaaceae); Streptomyces clavuligerus (Streptomycetaceae) | Antibacterial              |

|                         |       |                                                                                                                                                                                                                                                                                                                                       |                                                 |
|-------------------------|-------|---------------------------------------------------------------------------------------------------------------------------------------------------------------------------------------------------------------------------------------------------------------------------------------------------------------------------------------|-------------------------------------------------|
| Papaverine              | N     | Papaver somniferum (Papaveraceae)                                                                                                                                                                                                                                                                                                     | Neurological disease                            |
| Paricalcitol            | ND    | Salmonidae (Salmonidae); Agaricus bisporus (Agaricaceae)                                                                                                                                                                                                                                                                              | Calcium metabolism                              |
| Parnaparin sodium       | ND    | Homo sapiens (Hominidae)                                                                                                                                                                                                                                                                                                              | DVT; anticoagulant                              |
| Paromomycin sulfate     | N     | Streptomyces rimosus subsp. Paromomycinus (Streptomycetaceae); Streptomyces rimosus (Streptomycetaceae)                                                                                                                                                                                                                               | Antibacterial                                   |
| Pazopanib               | S/NM  | Zea mays (Poaceae); Cocos nucifera (Arecaceae); Spinacia oleracea (Amaranthaceae); Pisum sativum (Fabaceae); Zea mays (Poaceae); Cocos nucifera (Arecaceae); Spinacia oleracea (Amaranthaceae); Pisum sativum (Fabaceae); Zea mays (Poaceae); Cocos nucifera (Arecaceae); Spinacia oleracea (Amaranthaceae); Pisum sativum (Fabaceae) | Anticancer                                      |
| Pegademase bovine       | B     | Bos taurus (Bovidae)                                                                                                                                                                                                                                                                                                                  | Immunostimulant                                 |
| Pegaspargase            | B     | Escherichia coli (Enterobacteriaceae)                                                                                                                                                                                                                                                                                                 | Anticancer                                      |
| Pegfilgastrim           | B     | Homo sapiens (Hominidae)                                                                                                                                                                                                                                                                                                              | Hematopoiesis                                   |
| Peginterferon alfa-2a   | B     | Homo sapiens (Hominidae)                                                                                                                                                                                                                                                                                                              | Antiviral                                       |
| Peginterferon alfa-2b   | B     | Homo sapiens (Hominidae)                                                                                                                                                                                                                                                                                                              | Antiviral                                       |
| Pegvisomant             | B     | Homo sapiens (Hominidae)                                                                                                                                                                                                                                                                                                              | Acromelagy                                      |
| Penciclovir             | S*    | Human herpesvirus 1 (Herpesviridae); Human herpesvirus 2 (Herpesviridae); Homo sapiens (Hominidae)                                                                                                                                                                                                                                    | Antiviral                                       |
| Penicillamine           | ND    | Aspergillus flavus (Trichocomaceae); Emericella nidulans (Trichocomaceae); Penicillium chrysogenum (Trichocomaceae)                                                                                                                                                                                                                   | Antibiotic                                      |
| Penicillin G            | N     | Aspergillus flavus (Trichocomaceae); Emericella nidulans (Trichocomaceae); Penicillium chrysogenum (Trichocomaceae)                                                                                                                                                                                                                   | Antibacterial                                   |
| Pentazocine             | ND    | Papaver somniferum (Papaveraceae)                                                                                                                                                                                                                                                                                                     | Neurological disease                            |
| Pentostatin             | N     | Streptomyces antibioticus (Streptomycetaceae)                                                                                                                                                                                                                                                                                         | Oncological disease                             |
| Peplomycin              | ND    | Streptomyces verticillus (Streptomycetaceae)                                                                                                                                                                                                                                                                                          | Oncological disease                             |
| Pergolide mesylate      | ND    | Turbina corymbosa (Convolvulaceae); Ipomoea violacea (Convolvulaceae)                                                                                                                                                                                                                                                                 | AntiParkinsonian                                |
| Perindopril             | S*/NM | Bothrops jararaca (Viperidae)                                                                                                                                                                                                                                                                                                         | Cardiovascular disease                          |
| Permixon                | N     | Serenoa repens (Arecaceae)                                                                                                                                                                                                                                                                                                            | Benign prostatic hypertrophy                    |
| Phenoxymethylpenicillin | ND    | Aspergillus flavus (Trichocomaceae); Emericella nidulans (Trichocomaceae); Penicillium chrysogenum (Trichocomaceae)                                                                                                                                                                                                                   | Antibacterial                                   |
| Physostigmine           | N     | Physostigma venenosum (Fabaceae)                                                                                                                                                                                                                                                                                                      | Neurological disease                            |
| Picrotoxin              | N     | Anamirta cocculus (Menispermaceae)                                                                                                                                                                                                                                                                                                    | Analeptic                                       |
| Pilocarpine             | N     | Pilocarpus (Rutaceae)                                                                                                                                                                                                                                                                                                                 | Glaucoma                                        |
| Pimecrolimus            | ND    | Streptomyces hygroscopicus (Streptomycetaceae)                                                                                                                                                                                                                                                                                        | Immunological, inflammatory and related disease |
| Pinitol                 | N     | Vachellia farnesiana (Fabaceae); Cedrus deodara (Pinaceae); Ceratonia siliqua (Fabaceae); Glycine max (Fabaceae); Medicago sativa (Fabaceae); Pinus sylvestris (Pinaceae); Pisum sativum (Fabaceae); Thuja occidentalis (Cupressaceae); Trifolium pratense (Fabaceae); Tsuga canadensis (Pinaceae)                                    | Expectorant                                     |

|                                 |       |                                                                                                                                                              |                             |
|---------------------------------|-------|--------------------------------------------------------------------------------------------------------------------------------------------------------------|-----------------------------|
| Pirarubicin                     | ND    | <i>Streptomyces peucetius</i> (Streptomycetaceae)                                                                                                            | Oncological disease         |
| Pitavastatin                    | S*/NM | <i>Pseudonocardia autotrophica</i> (Pseudonocardiaceae);<br><i>Penicillium brevicompactum</i> (Trichocomaceae); <i>Penicillium citrinum</i> (Trichocomaceae) | Cardiovascular disease      |
| Plaunotol                       | N     | <i>Croton stellatopilosus</i> (Euphorbiaceae); <i>Croton sublyratus</i> (Euphorbiaceae)                                                                      | Antiulcer                   |
| Plenaxis                        | S*/NM | <i>Homo sapiens</i> (Hominidae)                                                                                                                              | Oncological disease         |
| Plicamycin                      | N     | <i>Streptomyces plicatus</i> (Streptomycetaceae)                                                                                                             | Anticancer                  |
| Pneumococcal vaccine            | V     | <i>Streptococcus pneumoniae</i> (Streptococcaceae)                                                                                                           | Antibacterial               |
| Podophyllotoxin                 | N     | <i>Dysosma pleiantha</i> (Berberidaceae); <i>Podophyllum peltatum</i> (Berberidaceae); <i>Sinopodophyllum hexandrum</i> (Berberidaceae)                      | Antiviral                   |
| Polaprezinc                     | ND    | <i>Homo sapiens</i> (Hominidae)                                                                                                                              | Antiulcer                   |
| Polyferon Interferon gamma      | B     | <i>Homo sapiens</i> (Hominidae)                                                                                                                              | Inflammatory disease        |
| Polymyxin B Sulfate             | N     | <i>Paenibacillus polymyxa</i> (Paenibacillaceae)                                                                                                             | Antibacterial               |
| Polyphenon 100                  | N     | <i>Acacia catechu</i> (Fabaceae); <i>Potentilla fragarioides</i> (Rosaceae)                                                                                  | Haemostatic                 |
| Polyphenon E                    | N     | <i>Camellia sinensis</i> (Theaceae)                                                                                                                          | Antiviral                   |
| Porcine isophane insulin        | B     | <i>Sus scrofa</i> (Suidae)                                                                                                                                   | Antidiabetic                |
| Porcine lung surfactant         | B     | <i>Sus scrofa</i> (Suidae)                                                                                                                                   | RDS                         |
| Porcine neutral insulin         | B     | <i>Sus scrofa</i> (Suidae)                                                                                                                                   | Antidiabetic                |
| Pralmorelin                     | ND    | <i>Homo sapiens</i> (Hominidae)                                                                                                                              | Treatment of GH deficiency  |
| Pravastatin                     | ND    | <i>Pseudonocardia autotrophica</i> (Pseudonocardiaceae);<br><i>Penicillium brevicompactum</i> (Trichocomaceae); <i>Penicillium citrinum</i> (Trichocomaceae) | Cardiovascular disease      |
| Prednicarbate                   | ND    | <i>Homo sapiens</i> (Hominidae)                                                                                                                              | Inflammatory disease        |
| Prednisolone                    | ND    | <i>Homo sapiens</i> (Hominidae)                                                                                                                              | Oncological disease         |
| Prednisone                      | ND    | <i>Homo sapiens</i> (Hominidae)                                                                                                                              | Oncological disease         |
| Pregabalin                      | ND    | <i>Homo sapiens</i> (Hominidae)                                                                                                                              | Antiepileptic               |
| Premphase                       | ND    | <i>Homo sapiens</i> (Hominidae)                                                                                                                              | Hormone replacement therapy |
| Preos                           | B     | <i>Homo sapiens</i> (Hominidae)                                                                                                                              | Osteoporosis                |
| Preven                          | ND    | <i>Homo sapiens</i> (Hominidae)                                                                                                                              | Contraception               |
| Prezotide copper acetate        | N     | <i>Homo sapiens</i> (Hominidae)                                                                                                                              | Vulnerary                   |
| Pristinamycin                   | N     | <i>Streptomyces pristinaespiralis</i> (Streptomycetaceae)                                                                                                    | Antibacterial               |
| Progabide                       | S*    | <i>Homo sapiens</i> (Hominidae)                                                                                                                              | Anticonvulsant              |
| Prohibit H influenzae b vaccine | V     | <i>Haemophilus influenzae</i> (Pasteurellaceae)                                                                                                              | Antibacterial               |
| Proleukin                       | B     | <i>Homo sapiens</i> (Hominidae)                                                                                                                              | Anticancer                  |
| Promegestone                    | ND    | <i>Homo sapiens</i> (Hominidae)                                                                                                                              | Progestogen                 |
| Propentofylline                 | ND    | <i>Homo sapiens</i> (Hominidae)                                                                                                                              | Vasodilator; cerebral       |

|                           |       |                                                                                                  |                                                 |
|---------------------------|-------|--------------------------------------------------------------------------------------------------|-------------------------------------------------|
| propionate                |       |                                                                                                  |                                                 |
| Propranolol               | ND    | Ephedra sinica (Ephedraceae); Acacia rigidula (Fabaceae); Senegalia berlandieri (Fabaceae)       | Cardiovascular disease                          |
| Proquad                   | V     | Human herpesvirus 3 (Herpesviridae)                                                              | Chickenpox                                      |
| Pro-urokinase             | B     | Homo sapiens (Hominidae)                                                                         | Antithrombotic                                  |
| Pseudoephedrine           | N     | Ephedra sinica (Ephedraceae)                                                                     | Immunological, inflammatory and related disease |
| Quinapril                 | S*/NM | Bothrops jararaca (Viperidae)                                                                    | Cardiovascular disease                          |
| Quinidine                 | N     | Cinchona (Rubiaceae)                                                                             | Antiarrhythmic                                  |
| Quinine                   | N     | Cinchona (Rubiaceae); Cinchona officinalis (Rubiaceae)                                           | Antiparasitic                                   |
| Quinupristin              | ND    | Streptomyces pristinaespiralis (Streptomycetaceae)                                               | Antibacterial                                   |
| Ramipril                  | S*/NM | Bothrops jararaca (Viperidae)                                                                    | Cardiovascular disease                          |
| Ramosetron                | S*/NM | Homo sapiens (Hominidae)                                                                         | Antiemetic                                      |
| Ranibizumab               | B     | Mus musculus (Muridae)                                                                           | Macular degeneration                            |
| Rasburicase               | B     | Homo sapiens (Hominidae)                                                                         | Antihyperuricemia                               |
| RecDNA somatotropin       | B     | Homo sapiens (Hominidae)                                                                         | Hormone                                         |
| Recombinate Factor VIII   | B     | Homo sapiens (Hominidae)                                                                         | Hemophilia                                      |
| Remoxipride hydrochloride | S*/NM | Homo sapiens (Hominidae)                                                                         | Antipsychotic                                   |
| ReoPro                    | B     | Homo sapiens (Hominidae)                                                                         | Antithrombotic                                  |
| Rescinnamine              | N     | Rauwolfia serpentina (Apocynaceae)                                                               | Cardiovascular disease                          |
| Reserpine                 | N     | Rauwolfia serpentina (Apocynaceae); Rauwolfia vomitoria (Apocynaceae)                            | Cardiovascular disease                          |
| Resp syncytial virus IG   | B     | Human respiratory syncytial virus (Paramyxoviridae)                                              | Antiviral                                       |
| Restandol                 | ND    | Homo sapiens (Hominidae)                                                                         | Hypogonadism                                    |
| Retapamulin               | ND    | Clitopilus scyphoides (Entolomataceae); Pleurotus (Pleurotaceae)                                 | Antibacterial                                   |
| Reteplase                 | B     | Homo sapiens (Hominidae)                                                                         | Antithrombotic                                  |
| Reviparin sodium          | ND    | Homo sapiens (Hominidae)                                                                         | Anticoagulant                                   |
| Rexin-g                   | B     | Homo sapiens (Hominidae)                                                                         | Anticancer                                      |
| Rh-alpha-glucosidase      | B     | Homo sapiens (Hominidae)                                                                         | Pompe's disease                                 |
| Ribavirin                 | ND    | Streptomyces candidus (Streptomycetaceae); Streptomyces showdoensis (Streptomycetaceae)          | Antiviral                                       |
| Rifabutin                 | ND    | Amycolatopsis mediterranei (Pseudonocardiaceae); Amycolatopsis rifamycinica (Pseudonocardiaceae) | Antibacterial                                   |
| Rifamixin                 | ND    | Amycolatopsis mediterranei (Pseudonocardiaceae); Amycolatopsis rifamycinica (Pseudonocardiaceae) | Antibacterial                                   |
| Rifampicin                | ND    | Amycolatopsis mediterranei (Pseudonocardiaceae); Amycolatopsis rifamycinica (Pseudonocardiaceae) | Antibacterial                                   |
| Rifamycin B               | N     | Amycolatopsis mediterranei (Pseudonocardiaceae); Amycolatopsis rifamycinica (Pseudonocardiaceae) | Antibacterial                                   |
| Rifapentine               | ND    | Amycolatopsis mediterranei (Pseudonocardiaceae); Amycolatopsis rifamycinica (Pseudonocardiaceae) | Antibacterial                                   |
| Rifaximin                 | ND    | Amycolatopsis mediterranei (Pseudonocardiaceae);                                                 | Antibacterial                                   |

|                               |       |                                                                                                                                                                                     |                                                 |
|-------------------------------|-------|-------------------------------------------------------------------------------------------------------------------------------------------------------------------------------------|-------------------------------------------------|
|                               |       | Amycolatopsis rifamycinica (Pseudonocardiaceae)                                                                                                                                     |                                                 |
| Rimexolone                    | ND    | Homo sapiens (Hominidae)                                                                                                                                                            | Inflammatory disease                            |
| Ritonavir                     | S*/NM | Actinomyces (Actinomycetaceae); Streptomyces testaceus (Streptomycetaceae); Streptomyces argenteolus subsp. toyonakensis (Streptomycetaceae)                                        | Antiviral                                       |
| Rituximab                     | B     | Homo sapiens (Hominidae)                                                                                                                                                            | Anticancer                                      |
| Rizatriptan benzoate          | S*/NM | Homo sapiens (Hominidae)                                                                                                                                                            | Antimigraine                                    |
| Rocuronium bromide            | ND    | Homo sapiens (Hominidae)                                                                                                                                                            | Muscle relaxant                                 |
| Roferon-A Interferon alfa2a   | B     | Homo sapiens (Hominidae)                                                                                                                                                            | Anticancer                                      |
| Rokitamycin                   | ND    | Streptomyces mycarofaciens (Streptomycetaceae)                                                                                                                                      | Antibacterial                                   |
| Romidepsin                    | N     | Chromobacterium violaceum (Neisseriaceae)                                                                                                                                           | Anticancer                                      |
| Ropinirole HCl                | S*/NM | Homo sapiens (Hominidae)                                                                                                                                                            | AntiParkinsonian                                |
| Rorifone                      | N     | Rorippa indica (Brassicaceae)                                                                                                                                                       | Antitussive                                     |
| Rosaprostol                   | ND    | Allium cepa (Amaryllidaceae); Allium sativum (Amaryllidaceae); Larix sibirica (Pinaceae); Prunus tomentosa (Rosaceae); Populus balsamifera (Salicaceae); Manduca sexta (Sphingidae) | Antiulcer                                       |
| Rosuvastatin calcium          | S*/NM | Pseudonocardia autotrophica (Pseudonocardiaceae); Penicillium brevicompactum (Trichocomaceae); Penicillium citrinum (Trichocomaceae)                                                | Cardiovascular disease                          |
| Rotarix Rotavirus vaccine     | V     | Rotavirus (Reoviridae)                                                                                                                                                              | Antiviral                                       |
| Rota-Shield Rotavirus vaccine | V     | Rotavirus (Reoviridae)                                                                                                                                                              | Antiviral                                       |
| Rotateq Rotavirus vaccine     | V     | Rotavirus (Reoviridae)                                                                                                                                                              | Antiviral                                       |
| Rotenone                      | N     | Lonchocarpus (Fabaceae)                                                                                                                                                             | Piscicide                                       |
| Rotigotine                    | S/NM  | Homo sapiens (Hominidae)                                                                                                                                                            | AntiParkinsonian                                |
| Roxithromycin                 | ND    | Saccharopolyspora erythraea (Pseudonocardiaceae)                                                                                                                                    | Antibacterial                                   |
| Rubella vaccine               | V     | Rubella virus (Togaviridae)                                                                                                                                                         | Antiviral                                       |
| Rutin                         | N     | Citrus (Rutaceae)                                                                                                                                                                   | Capillary fragility                             |
| Salbutamol                    | ND    | Ephedra sinica (Ephedraceae)                                                                                                                                                        | Inflammatory disease                            |
| Salicin                       | N     | Salix alba (Salicaceae)                                                                                                                                                             | Immunological, inflammatory and related disease |
| Salmeterol                    | ND    | Ephedra sinica (Ephedraceae)                                                                                                                                                        | Inflammatory disease                            |
| Sandimmune                    | N     | Claviceps purpurea (Clavicipitaceae); Tolypocladium inflatum (Clavicipitaceae); Cyindrocarpon lucidum (Nectriaceae)                                                                 | Immunological, inflammatory and related disease |
| Sandoparin Lmw heparin        | ND    | Homo sapiens (Hominidae)                                                                                                                                                            | Anticoagulant                                   |
| Sanguinarine                  | N     | Sanguinaria canadensis (Papaveraceae)                                                                                                                                               | Dental plaque inhibitor                         |
| Santonin                      | N     | Artemisia (Asteraceae)                                                                                                                                                              | Anthelmintic Chemotherapy                       |
| Sapropterin hydrochloride     | ND    | Homo sapiens (Hominidae)                                                                                                                                                            | Hyperphenylalaninemia                           |
| Saquinavir mesylate           | S*/NM | Actinomyces (Actinomycetaceae); Streptomyces testaceus (Streptomycetaceae); Streptomyces argenteolus subsp.                                                                         | Antiviral                                       |



|                             |       |                                                                                                                                                                                                                                                                                                                                                                                                                                                                                                                                                                 |                                                 |
|-----------------------------|-------|-----------------------------------------------------------------------------------------------------------------------------------------------------------------------------------------------------------------------------------------------------------------------------------------------------------------------------------------------------------------------------------------------------------------------------------------------------------------------------------------------------------------------------------------------------------------|-------------------------------------------------|
|                             |       | toyonakensis (Streptomycetaceae)                                                                                                                                                                                                                                                                                                                                                                                                                                                                                                                                |                                                 |
| Sargramostim                | B     | Homo sapiens (Hominidae)                                                                                                                                                                                                                                                                                                                                                                                                                                                                                                                                        | Immunostimulant                                 |
| Sarkomycin                  | N     | Streptomyces erythrochromogenes (Streptomycetaceae)                                                                                                                                                                                                                                                                                                                                                                                                                                                                                                             | Anticancer                                      |
| Sativex                     | N     | Cannabis sativa (Cannabaceae)                                                                                                                                                                                                                                                                                                                                                                                                                                                                                                                                   | Neuropathic pain                                |
| Schizophyllan               | N     | Schizophyllum commune (Schizophyllaceae)                                                                                                                                                                                                                                                                                                                                                                                                                                                                                                                        | Immunological, inflammatory and related disease |
| Scopolamine                 | N     | Datura metel (Solanaceae)                                                                                                                                                                                                                                                                                                                                                                                                                                                                                                                                       | Immunological, inflammatory and related disease |
| Senoside A                  | N     | Cassia senna (Fabaceae)                                                                                                                                                                                                                                                                                                                                                                                                                                                                                                                                         | Cardiovascular disease                          |
| Senoside B                  | N     | Cassia senna (Fabaceae)                                                                                                                                                                                                                                                                                                                                                                                                                                                                                                                                         | Cardiovascular disease                          |
| Serevent                    | S*/NM | Ephedra sinica (Ephedraceae)                                                                                                                                                                                                                                                                                                                                                                                                                                                                                                                                    | Inflammatory disease                            |
| Sermorelin acetate          | ND    | Homo sapiens (Hominidae)                                                                                                                                                                                                                                                                                                                                                                                                                                                                                                                                        | Growth hormone deficiency                       |
| Sertindole                  | S*/NM | Homo sapiens (Hominidae)                                                                                                                                                                                                                                                                                                                                                                                                                                                                                                                                        | Neuroleptic                                     |
| Sildenafil citrate          | S*/NM | Homo sapiens (Hominidae)                                                                                                                                                                                                                                                                                                                                                                                                                                                                                                                                        | Male sexual dysfunction                         |
| Silteplase                  | B     | Homo sapiens (Hominidae)                                                                                                                                                                                                                                                                                                                                                                                                                                                                                                                                        | Antithrombotic                                  |
| Silymarin                   | N     | Silybum marianum (Asteraceae)                                                                                                                                                                                                                                                                                                                                                                                                                                                                                                                                   | Antihepatotoxic                                 |
| Simvastatin                 | ND    | Pseudonocardia autotrophica (Pseudonocardiaceae); Aspergillus terreus (Trichocomaceae); Penicillium brevicompactum (Trichocomaceae); Penicillium citrinum (Trichocomaceae)                                                                                                                                                                                                                                                                                                                                                                                      | Cardiovascular disease                          |
| Sinecatechins               | NB    | Camellia sinensis (Theaceae)                                                                                                                                                                                                                                                                                                                                                                                                                                                                                                                                    | Anticancer                                      |
| Sirolimus                   | N     | Streptomyces hygroscopicus (Streptomycetaceae)                                                                                                                                                                                                                                                                                                                                                                                                                                                                                                                  | Immunosuppressive                               |
| Sodium oxybate              | ND    | Homo sapiens (Hominidae)                                                                                                                                                                                                                                                                                                                                                                                                                                                                                                                                        | Narcolepsy                                      |
| Sofalcone                   | ND    | Sophora flavescens (Fabaceae); Sophora alopecuroides (Fabaceae); Sophora prostrata (Fabaceae)                                                                                                                                                                                                                                                                                                                                                                                                                                                                   | Antiulcer                                       |
| Solamargine                 | N     | Solanum aculeatissimum (Solanaceae); Solanum incanum (Solanaceae); Solanum americanum (Solanaceae)                                                                                                                                                                                                                                                                                                                                                                                                                                                              | Oncological disease                             |
| Somatomedin-1               | B     | Homo sapiens (Hominidae)                                                                                                                                                                                                                                                                                                                                                                                                                                                                                                                                        | Hormone                                         |
| Somatotropin                | B     | Homo sapiens (Hominidae)                                                                                                                                                                                                                                                                                                                                                                                                                                                                                                                                        | Hormone                                         |
| Somatrem                    | B     | Homo sapiens (Hominidae)                                                                                                                                                                                                                                                                                                                                                                                                                                                                                                                                        | Hormone                                         |
| Somatropin                  | N     | Homo sapiens (Hominidae)                                                                                                                                                                                                                                                                                                                                                                                                                                                                                                                                        | Growth hormone deficiency                       |
| Somazon                     | B     | Homo sapiens (Hominidae)                                                                                                                                                                                                                                                                                                                                                                                                                                                                                                                                        | Antidiabetic                                    |
| Sorafenib                   | S/NM  | Zea mays (Poaceae); Cocos nucifera (Arecaceae); Spinacia oleracea (Amaranthaceae); Pisum sativum (Fabaceae); Zea mays (Poaceae); Cocos nucifera (Arecaceae); Spinacia oleracea (Amaranthaceae); Pisum sativum (Fabaceae); Zea mays (Poaceae); Cocos nucifera (Arecaceae); Spinacia oleracea (Amaranthaceae); Pisum sativum (Fabaceae); Zea mays (Poaceae); Cocos nucifera (Arecaceae); Spinacia oleracea (Amaranthaceae); Pisum sativum (Fabaceae); Zea mays (Poaceae); Cocos nucifera (Arecaceae); Spinacia oleracea (Amaranthaceae); Pisum sativum (Fabaceae) | Anticancer                                      |
| Sorivudine                  | S*    | Human herpesvirus 1 (Herpesviridae); Human herpesvirus 3 (Herpesviridae); Human herpesvirus 4 (Herpesviridae); Homo sapiens (Hominidae)                                                                                                                                                                                                                                                                                                                                                                                                                         | Antiviral                                       |
| Spectinomycin hydrochloride | N     | Streptomyces spectabilis (Streptomycetaceae)                                                                                                                                                                                                                                                                                                                                                                                                                                                                                                                    | Antibiotic                                      |

|                                 |       |                                                                                                                                                                                                                                                                                                                                                                                                                                                                                                                                                                 |                                                 |
|---------------------------------|-------|-----------------------------------------------------------------------------------------------------------------------------------------------------------------------------------------------------------------------------------------------------------------------------------------------------------------------------------------------------------------------------------------------------------------------------------------------------------------------------------------------------------------------------------------------------------------|-------------------------------------------------|
| Spectracef                      | ND    | Acremonium chrysogenum (Acremonium); Emericellopsis minima (Emericellopsis); Amycolatopsis lactamdurans (Pseudonocardaceae); Streptomyces clavuligerus (Streptomycetaceae)                                                                                                                                                                                                                                                                                                                                                                                      | Antibacterial                                   |
| Sphingosomal topotecan          | ND    | Mappia foetida (Icacinaeae); Camptotheca acuminata (Cornaceae); Ophiorrhiza pumila (Rubiaceae)                                                                                                                                                                                                                                                                                                                                                                                                                                                                  | Oncological disease                             |
| Spiramycin                      | N     | Streptomyces ambofaciens (Streptomycetaceae)                                                                                                                                                                                                                                                                                                                                                                                                                                                                                                                    | Antibiotic                                      |
| Spirapril HCl                   | S*/NM | Bothrops jararaca (Viperidae)                                                                                                                                                                                                                                                                                                                                                                                                                                                                                                                                   | Cardiovascular disease                          |
| Stavudine                       | S*    | Human immunodeficiency virus 1 (Retroviridae); Homo sapiens (Hominidae)                                                                                                                                                                                                                                                                                                                                                                                                                                                                                         | Antiviral                                       |
| Stevioside                      | N     | Stevia rebaudiana (Asteraceae)                                                                                                                                                                                                                                                                                                                                                                                                                                                                                                                                  | Sweetener                                       |
| Streptomycin sulfate            | N     | Streptomyces griseus (Streptomycetaceae)                                                                                                                                                                                                                                                                                                                                                                                                                                                                                                                        | Antibacterial                                   |
| Streptozocin                    | N     | Streptomyces achromogenes (Streptomycetaceae)                                                                                                                                                                                                                                                                                                                                                                                                                                                                                                                   | Oncological disease                             |
| Strychnine                      | N     | Strychnos nux-vomica (Loganiaceae)                                                                                                                                                                                                                                                                                                                                                                                                                                                                                                                              | Neurological disease                            |
| Suberoylanilide hydroxamic acid | ND    | Streptomyces hygroscopicus (Streptomycetaceae)                                                                                                                                                                                                                                                                                                                                                                                                                                                                                                                  | Oncological disease                             |
| Sulbactam sodium                | ND    | Aspergillus flavus (Trichocomaceae); Emericella nidulans (Trichocomaceae); Penicillium chrysogenum (Trichocomaceae)                                                                                                                                                                                                                                                                                                                                                                                                                                             | Beta-lactamase inhibitor                        |
| Sulprostone                     | ND    | Larix sibirica (Pinaceae); Prunus tomentosa (Rosaceae); Populus balsamifera (Salicaceae); Manduca sexta (Sphingidae)                                                                                                                                                                                                                                                                                                                                                                                                                                            | Abortifacient                                   |
| Sultamicillin tosilate          | ND    | Aspergillus flavus (Trichocomaceae); Emericella nidulans (Trichocomaceae); Penicillium chrysogenum (Trichocomaceae)                                                                                                                                                                                                                                                                                                                                                                                                                                             | Antibacterial                                   |
| Sumatriptan succinate           | S*/NM | Homo sapiens (Hominidae)                                                                                                                                                                                                                                                                                                                                                                                                                                                                                                                                        | Antimigraine                                    |
| Sunitinib malate                | S/NM  | Zea mays (Poaceae); Cocos nucifera (Arecaceae); Spinacia oleracea (Amaranthaceae); Pisum sativum (Fabaceae); Zea mays (Poaceae); Cocos nucifera (Arecaceae); Spinacia oleracea (Amaranthaceae); Pisum sativum (Fabaceae); Zea mays (Poaceae); Cocos nucifera (Arecaceae); Spinacia oleracea (Amaranthaceae); Pisum sativum (Fabaceae); Zea mays (Poaceae); Cocos nucifera (Arecaceae); Spinacia oleracea (Amaranthaceae); Pisum sativum (Fabaceae); Zea mays (Poaceae); Cocos nucifera (Arecaceae); Spinacia oleracea (Amaranthaceae); Pisum sativum (Fabaceae) | Anticancer                                      |
| Synercid                        | ND    | Streptomyces pristinaespiralis (Streptomycetaceae)                                                                                                                                                                                                                                                                                                                                                                                                                                                                                                              | Antibacterial                                   |
| Tacalcitol                      | ND    | Agaricus bisporus (Agaricaceae)                                                                                                                                                                                                                                                                                                                                                                                                                                                                                                                                 | Antipsoriatic                                   |
| Tacrolimus                      | N     | Streptomyces tsukubaensis (Streptomycetaceae)                                                                                                                                                                                                                                                                                                                                                                                                                                                                                                                   | Immunological, inflammatory and related disease |
| Tadalafil                       | S*/NM | Homo sapiens (Hominidae)                                                                                                                                                                                                                                                                                                                                                                                                                                                                                                                                        | Male sexual dysfunction                         |
| Taltirelin                      | ND    | Homo sapiens (Hominidae)                                                                                                                                                                                                                                                                                                                                                                                                                                                                                                                                        | CNS Stimulant                                   |
| Tandospirone                    | S/NM  | Homo sapiens (Hominidae)                                                                                                                                                                                                                                                                                                                                                                                                                                                                                                                                        | Anxiolytic                                      |
| Tasonermin                      | B     | Escherichia coli (Enterobacteriaceae)                                                                                                                                                                                                                                                                                                                                                                                                                                                                                                                           | Anticancer                                      |
| Tazobactam sodium               | ND    | Aspergillus flavus (Trichocomaceae); Emericella nidulans (Trichocomaceae); Penicillium chrysogenum (Trichocomaceae)                                                                                                                                                                                                                                                                                                                                                                                                                                             | Antibacterial                                   |
| Teceleukin                      | B     | Homo sapiens (Hominidae); Escherichia coli                                                                                                                                                                                                                                                                                                                                                                                                                                                                                                                      | Anticancer                                      |

|                               |       |                                                                                                                                                                                           |                          |
|-------------------------------|-------|-------------------------------------------------------------------------------------------------------------------------------------------------------------------------------------------|--------------------------|
|                               |       | (Enterobacteriaceae)                                                                                                                                                                      |                          |
| Tegaserod maleate             | S*/NM | Homo sapiens (Hominidae)                                                                                                                                                                  | IBS                      |
| Teicoplanin                   | N     | Actinoplanes teichomyceticus (Micromonosporaceae)                                                                                                                                         | Antibacterial            |
| Telavancin                    | ND    | Amycolatopsis orientalis (Pseudonocardiaceae)                                                                                                                                             | Antibiotic               |
| Telithromycin                 | ND    | Saccharopolyspora erythraea (Pseudonocardiaceae)                                                                                                                                          | Antibacterial            |
| Telmisartan                   | S/NM  | Rattus norvegicus (Muridae)                                                                                                                                                               | Antihypertensive         |
| Temocapril hydrochloride      | S*/NM | Bothrops jararaca (Viperidae)                                                                                                                                                             | Cardiovascular disease   |
| Temocillin disodium           | ND    | Aspergillus flavus (Trichocomaceae); Emericella nidulans (Trichocomaceae); Penicillium chrysogenum (Trichocomaceae)                                                                       | Antibacterial            |
| Temoporfin                    | S/NM  | Homo sapiens (Hominidae)                                                                                                                                                                  | Anticancer               |
| Temsirolimus                  | ND    | Streptomyces hygrosopicus (Streptomycetaceae)                                                                                                                                             | Anticancer               |
| Tenecteplase                  | B     | Homo sapiens (Hominidae)                                                                                                                                                                  | Antithrombotic           |
| Teniposide                    | ND    | Dysosma pleiantha (Berberidaceae); Podophyllum peltatum (Berberidaceae); Sinopodophyllum hexandrum (Berberidaceae)                                                                        | Oncological disease      |
| Tenofovir disoproxil fumarate | S*    | Human immunodeficiency virus 1 (Retroviridae); Homo sapiens (Hominidae)                                                                                                                   | Antiviral                |
| Teprenone                     | ND    | Homo sapiens (Hominidae)                                                                                                                                                                  | Antiulcer                |
| Terbutyline                   | ND    | Homo sapiens (Hominidae)                                                                                                                                                                  | Antihypertensive         |
| Teriparatide acetate          | ND    | Homo sapiens (Hominidae)                                                                                                                                                                  | Osteoporosis             |
| Tesamorelin                   | N     | Homo sapiens (Hominidae)                                                                                                                                                                  | HIV lipodystrophy        |
| Teslac                        | ND    | Homo sapiens (Hominidae)                                                                                                                                                                  | Oncological disease      |
| Testosterone                  | N     | Homo sapiens (Hominidae)                                                                                                                                                                  | Antineoplastic           |
| Tetracycline                  | N     | Streptomyces aureofaciens (Streptomycetaceae); Streptomyces viridifaciens (Streptomycetaceae)                                                                                             | Antibacterial            |
| THC-CBD                       | N     | Cannabis sativa (Cannabaceae)                                                                                                                                                             | Neurological disease     |
| Theobromine                   | N     | Theobroma cacao (Malvaceae)                                                                                                                                                               | Vasodilator, Diuretic    |
| Theophylline                  | N     | Theobroma cacao (Malvaceae); Theobroma bicolor (Malvaceae); Theobroma angustifolium (Malvaceae); Paullinia cupana (Sapindaceae); Camellia sinensis (Theaceae); Coffea arabica (Rubiaceae) | Bronchodilator, Diuretic |
| TheraCys                      | V     | Mycobacterium bovis BCG (Mycobacteriaceae)                                                                                                                                                | Anticancer               |
| Thiamphenicol                 | ND    | Streptomyces venezuelae (Streptomycetaceae)                                                                                                                                               | Antibiotic               |
| Thioguanine                   | S*    | Homo sapiens (Hominidae)                                                                                                                                                                  | Oncological disease      |
| Thymalfasin                   | B     | Homo sapiens (Hominidae)                                                                                                                                                                  | Hepatitis                |
| Thymoglobuline                | B     | Homo sapiens (Hominidae)                                                                                                                                                                  | Immunosuppressant        |
| Thymol                        | N     | Thymus vulgaris (Lamiaceae)                                                                                                                                                               | Antifungal               |
| Thymopentin                   | ND    | Homo sapiens (Hominidae)                                                                                                                                                                  | Immunomodulator          |
| Tibolone                      | N     | Homo sapiens (Hominidae)                                                                                                                                                                  | Anabolic metabolism      |
| Tigecycline                   | ND    | Streptomyces aureofaciens (Streptomycetaceae); Streptomyces viridifaciens (Streptomycetaceae)                                                                                             | Antibacterial            |
| Timentin                      | ND    | Aspergillus flavus (Trichocomaceae); Emericella nidulans (Trichocomaceae); Penicillium chrysogenum (Trichocomaceae)                                                                       | Antibacterial            |

|                             |       |                                                                                                                                         |                                                 |
|-----------------------------|-------|-----------------------------------------------------------------------------------------------------------------------------------------|-------------------------------------------------|
| Tiopronin                   | ND    | Homo sapiens (Hominidae)                                                                                                                | Urolithiasis                                    |
| Tiotropium bromide          | S*/NM | Atropa belladonna (Solanaceae); Datura stramonium (Solanaceae); Mandragora officinarum (Solanaceae)                                     | Anticholinergic                                 |
| Tobramycin sulfate          | N     | Streptomyces tenebrarius (Pseudonocardiaceae)                                                                                           | Antibacterial                                   |
| Tocilizumab                 | B     | Mus musculus (Muridae)                                                                                                                  | Inflammatory bowel disease                      |
| Toposar                     | ND    | Dysosma pleiantha (Berberidaceae); Podophyllum peltatum (Berberidaceae); Sinopodophyllum hexandrum (Berberidaceae)                      | Oncological disease                             |
| Topotecan HCl               | ND    | Mappia foetida (Icacinaceae); Camptotheca acuminata (Cornaceae); Ophiorrhiza pumila (Rubiaceae)                                         | Oncological disease                             |
| Tositumomab                 | B     | Homo sapiens (Hominidae)                                                                                                                | Anticancer                                      |
| Trandolapril                | S*/NM | Bothrops jararaca (Viperidae)                                                                                                           | Cardiovascular disease                          |
| Tranlycypromine sulfate     | ND    | Ephedra sinica (Ephedraceae); Acacia rigidula (Fabaceae); Senegalia berlandieri (Fabaceae)                                              | Major depressive                                |
| Trastuzumab                 | B     | Mus musculus (Muridae)                                                                                                                  | Oncological disease                             |
| Travoprost                  | ND    | Allium sativum (Amaryllidaceae); Artemisia dracunculus (Asteraceae); Manduca sexta (Sphingidae)                                         | Antiglaucoma                                    |
| Treprostinil sodium         | ND    | Homo sapiens (Hominidae)                                                                                                                | Antihypertensive; pulmonary                     |
| Tretinoin tocoferil         | ND    | Daucus carota (Apiaceae)                                                                                                                | Antiulcer                                       |
| Triamcinolone               | ND    | Homo sapiens (Hominidae)                                                                                                                | Oncological disease                             |
| Trimegestone                | ND    | Homo sapiens (Hominidae)                                                                                                                | Hormone replacement therapy                     |
| Triptolide                  | N     | Tripterygium wilfordii (Celastraceae)                                                                                                   | Immunological, inflammatory and related disease |
| Triptorelin                 | ND    | Homo sapiens (Hominidae)                                                                                                                | Oncological disease                             |
| Trobicin                    | N     | Streptomyces spectabilis (Streptomycetaceae)                                                                                            | Antibiotic                                      |
| Troleandomycin              | ND    | Saccharopolyspora erythraea (Pseudonocardiaceae)                                                                                        | Antibacterial                                   |
| Tubocurarine                | N     | Strychnos (Loganiaceae); Strychnos (Loganiaceae); Chondrodendron tomentosum (Menispermaceae); Curarea (Menispermaceae)                  | Skeletal muscle relaxant                        |
| Ubenimex                    | N     | Streptomyces olivoreticuli (Streptomycetaceae)                                                                                          | Immunological, inflammatory and related disease |
| Ulinastatin                 | B     | Homo sapiens (Hominidae)                                                                                                                | Pancreatic disorders                            |
| Unoprostone isopropyl ester | ND    | Larix sibirica (Pinaceae); Prunus tomentosa (Rosaceae); Populus balsamifera (Salicaceae); Manduca sexta (Sphingidae)                    | Antiglaucoma                                    |
| Urofollitrophin             | B     | Homo sapiens (Hominidae)                                                                                                                | Infertility; female                             |
| Valaciclovir HCl            | S*    | Human herpesvirus 1 (Herpesviridae); Human herpesvirus 2 (Herpesviridae); Human herpesvirus 3 (Herpesviridae); Homo sapiens (Hominidae) | Antiviral                                       |
| Valganciclovir              | S*    | Cytomegalovirus (Herpesviridae); Homo sapiens (Hominidae)                                                                               | Antiviral                                       |
| Valrubicin                  | ND    | Streptomyces peucetius (Streptomycetaceae)                                                                                              | Oncological disease                             |
| Valsartan                   | S/NM  | Rattus norvegicus (Muridae)                                                                                                             | Antihypertensive                                |
| Vancomycin                  | N     | Amycolatopsis orientalis (Pseudonocardiaceae)                                                                                           | Antibacterial                                   |
| Vapreotide acetate          | ND    | Homo sapiens (Hominidae)                                                                                                                | Anticancer                                      |
| Vaqa Hepatitis a vaccine    | V     | Hepatitis A virus (Picornaviridae)                                                                                                      | Hepatitis                                       |
| Vardenafil                  | S*/NM | Homo sapiens (Hominidae)                                                                                                                | Male sexual dysfunction                         |

|                                 |      |                                                                                                                                           |                        |
|---------------------------------|------|-------------------------------------------------------------------------------------------------------------------------------------------|------------------------|
| Varivax Varicella virus vaccine | V    | Human herpesvirus 3 (Herpesviridae)                                                                                                       | Antiviral              |
| VariZIG                         | V    | Human herpesvirus 3 (Herpesviridae)                                                                                                       | Antiviral              |
| Vasicine                        | N    | Acanthaceae (Acanthaceae)                                                                                                                 | Oxytocic               |
| Vecuronium bromide              | ND   | Homo sapiens (Hominidae)                                                                                                                  | Muscle relaxant        |
| Velaglucerase alfa              | N    | Homo sapiens (Hominidae)                                                                                                                  | Gaucher disease        |
| Velosulin BR insulin            | B    | Homo sapiens (Hominidae)                                                                                                                  | Antidiabetic           |
| Verteporfin                     | S*   | Homo sapiens (Hominidae)                                                                                                                  | Photosensitizer        |
| Vi polysaccharide typhoid vacc  | V    | Salmonella enterica subsp. enterica serovar Typhi (Enterobacteriaceae)                                                                    | Antibacterial          |
| Vidarabine                      | S*   | Streptomyces antibioticus (Streptomycetaceae); Streptomyces griseus (Streptomycetaceae); Tethya (Tethyidae)                               | Antiviral              |
| Vigabatrin                      | ND   | Homo sapiens (Hominidae)                                                                                                                  | Antiepileptic          |
| VIGIV Vaccinia immune globulin  | V    | Homo sapiens (Hominidae)                                                                                                                  | Vaccinia complications |
| Vinblastine                     | N    | Catharanthus roseus (Apocynaceae)                                                                                                         | Oncological disease    |
| Vincamine                       | N    | Vinca minor (Apocynaceae)                                                                                                                 | Cerebral stimulant     |
| Vincristine                     | N    | Catharanthus roseus (Apocynaceae)                                                                                                         | Oncological disease    |
| Vindesine                       | ND   | Catharanthus roseus (Apocynaceae)                                                                                                         | Oncological disease    |
| Vinorelbine                     | N    | Catharanthus roseus (Apocynaceae)                                                                                                         | Oncological disease    |
| Viomycin sulfate                | N    | Streptomyces puniceus (Streptomycetaceae)                                                                                                 | Antibacterial          |
| Viraferon                       | B    | Homo sapiens (Hominidae)                                                                                                                  | Antiviral              |
| Virginiamycin                   | ND   | Streptomyces pristinaespiralis (Streptomycetaceae)                                                                                        | Antibiotic             |
| Voglibose                       | N    | Streptomyces hygroscopicus (Streptomycetaceae)                                                                                            | Cardiovascular disease |
| Vyvanse                         | ND   | Ephedra sinica (Ephedraceae); Acacia rigidula (Fabaceae); Senegalia berlandieri (Fabaceae)                                                | Neurological disease   |
| Warfarin                        | N    | Melilotus officinalis (Fabaceae)                                                                                                          | Cardiovascular disease |
| Wellferon                       | B    | Homo sapiens (Hominidae)                                                                                                                  | Antiviral              |
| Wilate                          | B    | Homo sapiens (Hominidae)                                                                                                                  | Hemophilia             |
| Wilfactin                       | B    | Homo sapiens (Hominidae)                                                                                                                  | Hemostatic             |
| Xanthotoxin                     | N    | Ammi majus (Apiaceae)                                                                                                                     | Leukoderma, Vitiligo   |
| Ximelagatran                    | S/NM | Homo sapiens (Hominidae)                                                                                                                  | DVT; anticoagulant     |
| Xostavax                        | V    | Human herpesvirus 3 (Herpesviridae)                                                                                                       | Antiviral              |
| Yamatetan                       | ND   | Amycolatopsis lactamdurans (Pseudonocardiaceae); Streptomyces cattleya (Streptomycetaceae); Streptomyces clavuligerus (Streptomycetaceae) | Antibacterial          |
| Yohimbine                       | N    | Pausinystalia (Rubiaceae)                                                                                                                 | Aphrodisiac            |
| Zalcitabine                     | S*   | Human immunodeficiency virus 1 (Retroviridae); Homo sapiens (Hominidae)                                                                   | Antiviral              |
| Zalig RV-11                     | ND   | Saccharopolyspora erythraea (Pseudonocardiaceae)                                                                                          | Antibacterial          |
| Ziagen                          | S*   | Human immunodeficiency virus 1 (Retroviridae); Homo sapiens (Hominidae)                                                                   | Antiviral              |
| Zidovudine                      | S*   | Human immunodeficiency virus 1 (Retroviridae); Tethya (Tethyidae)                                                                         | Antiviral              |

|                       |    |                                                                                                                     |                     |
|-----------------------|----|---------------------------------------------------------------------------------------------------------------------|---------------------|
| Zienam                | ND | Streptomyces cattleya (Streptomycetaceae)                                                                           | Antibacterial       |
| Zinc hyaluronate      | ND | Homo sapiens (Hominidae)                                                                                            | Vulnerary           |
| Zinostatin stimalamer | ND | Streptomyces carzinostaticus (Streptomycetaceae)                                                                    | Oncological disease |
| Zobactin              | ND | Aspergillus flavus (Trichocomaceae); Emericella nidulans (Trichocomaceae); Penicillium chrysogenum (Trichocomaceae) | Antibacterial       |
| Zomacton              | B  | Homo sapiens (Hominidae)                                                                                            | Hormone             |
| Zotarolimus           | ND | Streptomyces hygroscopicus (Streptomycetaceae)                                                                      | Oncological disease |

**SI Appendix Table S6** List of nature-derived current and past clinical trial drugs and their species origins. Following the seminal works of Newman and Cragg (J Nat Prod. 2007 Mar;70(3):461-77), the drug types are defined as follows: “B” Biological, a peptide or protein either isolated from an organism/cell line or produced by biotechnological means in a surrogate host; “N” Natural product; “ND” Derived from a natural product and is usually a semisynthetic modification; “NM” Natural product mimic; “S\*” Made by total synthesis based on the pharmacophore from a natural product; and “V” Vaccine.

| Drug name              | Clinical trial status | Drug type | Species origin (family)                                                                                                                 | Therapeutic class or targeted disease           |
|------------------------|-----------------------|-----------|-----------------------------------------------------------------------------------------------------------------------------------------|-------------------------------------------------|
| 1,5-DCQA               | Phase I               | N         | <i>Cynara cardunculus</i> (Asteraceae); <i>Inula britannica</i> (Asteraceae)                                                            | Antiviral                                       |
| 10-Hydroxycamptothecin | Phase II              | ND        | <i>Camptotheca acuminata</i> (Cornaceae); <i>Mappia foetida</i> (Icacaceae); <i>Ophiorrhiza pumila</i> (Rubiaceae)                      | Oncological disease                             |
| 9-aminocamptothecin    | Phase II              | ND        | <i>Camptotheca acuminata</i> (Cornaceae); <i>Mappia foetida</i> (Icacaceae); <i>Ophiorrhiza pumila</i> (Rubiaceae)                      | Oncological disease                             |
| A366833                | Phase I               | ND        | <i>Epipedobates tricolor</i> (Dendrobatidae)                                                                                            | Analgesic                                       |
| ABJ-879                | Phase I               | ND        | <i>Sorangium cellulosum</i> (Polyangiaceae)                                                                                             | Oncological disease                             |
| ABT-518                | Phase I               | S/NM      | <i>Homo sapiens</i> (Hominidae)                                                                                                         | Solid tumours                                   |
| ABT-594                | Phase II              | ND        | <i>Epipedobates tricolor</i> (Dendrobatidae)                                                                                            | Neurological disease                            |
| ABT-869                | Phase I               | ND        | <i>Zea mays</i> (Poaceae); <i>Cocos nucifera</i> (Arecaceae); <i>Spinacia oleracea</i> (Amaranthaceae); <i>Pisum sativum</i> (Fabaceae) | Anticancer                                      |
| ACV1                   | Phase II              | N         | <i>Conus catus</i> (Conidae)                                                                                                            | Pain                                            |
| AE-941                 | Phase III             | ND        | <i>Squalus acanthias</i> (Squalidae)                                                                                                    | Oncological disease                             |
| AEE-788                | Phase II              | ND        | <i>Zea mays</i> (Poaceae); <i>Cocos nucifera</i> (Arecaceae); <i>Spinacia oleracea</i> (Amaranthaceae); <i>Pisum sativum</i> (Fabaceae) | Oncological disease                             |
| AG3340                 | Phase III             | S*/NM     | <i>Homo sapiens</i> (Hominidae)                                                                                                         | Cancer                                          |
| AG7088                 | Phase II              | S*/NM     | Human rhinovirus sp. (Picornaviridae)                                                                                                   | Common cold                                     |
| Alpha-Conotoxin Vc1.1  | Phase II              | N         | <i>Conus victoriae</i> (Conidae)                                                                                                        | Neurological disease                            |
| Alvespimycin           | Phase II              | ND        | <i>Streptomyces hygroscopicus</i> subsp. <i>geldanus</i> (Streptomycetaceae)                                                            | Oncological disease                             |
| ALX 111                | Phase III             | N         | <i>Homo sapiens</i> (Hominidae)                                                                                                         | Osteoporosis                                    |
| AMG706                 | Phase II              | ND        | <i>Zea mays</i> (Poaceae); <i>Cocos nucifera</i> (Arecaceae); <i>Spinacia oleracea</i> (Amaranthaceae); <i>Pisum sativum</i> (Fabaceae) | Anticancer                                      |
| Aminocandin            | Phase I               | ND        | <i>Aspergillus sydowii</i> (Trichocomaceae)                                                                                             | Antifungal                                      |
| Anabaseine             | Phase I               | N         | <i>Paranemertes peregrina</i> (Paranemertes); <i>Amphiporus angulatus</i> (Amphiporidae)                                                | Neurological disease                            |
| Ancred                 | Phase III             | N         | <i>Calloselasma rhodostoma</i> (Viperidae)                                                                                              | Immunological, inflammatory and related disease |

|                      |           |      |                                                                                                             |                     |
|----------------------|-----------|------|-------------------------------------------------------------------------------------------------------------|---------------------|
| Anhydrovinblastine   | Phase I   | ND   | Catharanthus roseus (Apocynaceae)                                                                           | Oncological disease |
| Aplaviroc            | Phase II  | S/NM | Homo sapiens (Hominidae)                                                                                    | Antiviral           |
| AraC/Bryostatin 1    | Phase I   | N    | Bugula neritina (Bugulidae); Tethya (Tethyidae)                                                             | Oncological disease |
| Arenastatin A        | Phase I   | N    | Dysidea (Dysideidae)                                                                                        | Oncological disease |
| Artemisone           | Phase II  | ND   | Artemisia annua (Asteraceae)                                                                                | Antiparasitic       |
| Arterolane           | Phase II  | ND   | Artemisia annua (Asteraceae)                                                                                | Antiparasitic       |
| AVE-8062             | Phase III | ND   | Combretum (Combretaceae)                                                                                    | Oncological disease |
| AVE-8063             | Phase I   | ND   | Combretum (Combretaceae)                                                                                    | Oncological disease |
| AVE-8064             | Phase I   | ND   | Combretum (Combretaceae)                                                                                    | Oncological disease |
| AVE9633              | Phase I   | ND   | Anomodon attenuatus (Anomodontaceae); Claopodium crispifolium (Leskeaceae)                                  | Oncological disease |
| Axitinib             | Phase II  | ND   | Zea mays (Poaceae); Cocos nucifera (Arecaceae); Spinacia oleracea (Amaranthaceae); Pisum sativum (Fabaceae) | Anticancer          |
| Azamulin             | Phase I   | ND   | Pleurotus (Pleurotaceae)                                                                                    | Antibiotic          |
| AZD-0530             | Phase I   | ND   | Zea mays (Poaceae); Cocos nucifera (Arecaceae); Spinacia oleracea (Amaranthaceae); Pisum sativum (Fabaceae) | Anticancer          |
| AZD-3409             | Phase I   | S/NM | Homo sapiens (Hominidae)                                                                                    | Anticancer          |
| BAL-19403            | Phase I   | ND   | Saccharopolyspora erythraea (Pseudonocardiaceae)                                                            | Antibacterial       |
| Batimastat           | Phase III | S/NM | Homo sapiens (Hominidae)                                                                                    | Anticancer          |
| BAY-57-9352          | Phase I   | ND   | Zea mays (Poaceae); Cocos nucifera (Arecaceae); Spinacia oleracea (Amaranthaceae); Pisum sativum (Fabaceae) | Anticancer          |
| BBI concentrate      | Phase II  | N    | Glycine max (Fabaceae)                                                                                      | Cancer              |
| BC-3205              | Phase I   | ND   | Clitopilus scyphoides (Entolomataceae); Pleurotus (Pleurotaceae)                                            | Antibacterial       |
| BC-3781              | Phase II  | ND   | Pleurotus (Pleurotaceae)                                                                                    | Antibiotic          |
| BC-7013              | Phase I   | ND   | Clitopilus scyphoides (Entolomataceae)                                                                      | Antibacterial       |
| Becatecarin          | Phase II  | ND   | Lentzea albida (Actinosynnemataceae)                                                                        | Oncological disease |
| Bengamide A          | Phase I   | ND   | Ancorinidae (Ancorinidae); Myxococcus virescens (Myxococcaceae)                                             | Oncological disease |
| Benzoxazinorifamycin | Phase II  | ND   | Amycolatopsis mediterranei (Pseudonocardiaceae); Amycolatopsis rifamycinica (Pseudonocardiaceae)            | Antibacterial       |
| Berubicin            | Phase II  | ND   | Streptomyces peucetius (Streptomycetaceae)                                                                  | Oncological disease |
| Beta-lapachone       | Phase II  | ND   | Tabebuia (Bignoniaceae)                                                                                     | Oncological disease |
| Betulinic acid       | Phase I   | N    | Syzygium claviflorum (Myrtaceae)                                                                            | Oncological disease |
| Bevirimat            | Phase II  | ND   | Syzygium claviflorum (Myrtaceae)                                                                            | Antiviral           |
| Bizelesin            | Phase I   | ND   | Streptomyces (Streptomycetaceae)                                                                            | Oncological disease |
| BMS-182248           | Phase II  | ND   | Streptomyces peucetius (Streptomycetaceae)                                                                  | Oncological disease |
| BMS-184476           | Phase II  | ND   | Taxus wallichiana (Taxaceae); Taxus brevifolia (Taxaceae)                                                   | Oncological disease |
| BMS-188797           | Phase II  | ND   | Taxus wallichiana (Taxaceae); Taxus brevifolia (Taxaceae)                                                   | Oncological disease |
| BMS-214662           | Phase I   | S/NM | Homo sapiens (Hominidae)                                                                                    | Anticancer          |
| BMS-247550           | Phase III | ND   | Sorangium cellulosum (Polyangiaceae)                                                                        | Anticancer          |



|                        |                   |       |                                                                                                                                                                                                          |                       |
|------------------------|-------------------|-------|----------------------------------------------------------------------------------------------------------------------------------------------------------------------------------------------------------|-----------------------|
| BMS-250749             | Phase I           | ND    | Camptotheca acuminata (Cornaceae); Mappia foetida (Icacinaceae); Ophiorrhiza pumila (Rubiaceae)                                                                                                          | Oncological disease   |
| BMS-275183             | Phase I           | ND    | Taxus wallichiana (Taxaceae); Taxus brevifolia (Taxaceae)                                                                                                                                                | Oncological disease   |
| BMS-275291             | Phase III         | S*/NM | Homo sapiens (Hominidae)                                                                                                                                                                                 | Cancer                |
| BMS-310705             | Phase I           | ND    | Sorangium cellulosum (Polyangiaceae)                                                                                                                                                                     | Oncological disease   |
| BMS-582664             | Phase I           | ND    | Zea mays (Poaceae); Cocos nucifera (Arecaceae); Spinacia oleracea (Amaranthaceae); Pisum sativum (Fabaceae)                                                                                              | Anticancer            |
| BMS-599626             | Phase I           | ND    | Zea mays (Poaceae); Cocos nucifera (Arecaceae); Spinacia oleracea (Amaranthaceae); Pisum sativum (Fabaceae)                                                                                              | Anticancer            |
| BNP-1350               | Phase III         | ND    | Camptotheca acuminata (Cornaceae); Mappia foetida (Icacinaceae); Ophiorrhiza pumila (Rubiaceae)                                                                                                          | Oncological disease   |
| Bosutinib              | Phase I           | ND    | Zea mays (Poaceae); Cocos nucifera (Arecaceae); Spinacia oleracea (Amaranthaceae); Pisum sativum (Fabaceae)                                                                                              | Anticancer            |
| Brostallicin           | Phase II          | ND    | Streptomyces netropsis (Streptomycetaceae)                                                                                                                                                               | Oncological disease   |
| Bruceantin             | Phase II          | N     | Brucea antidysenterica (Simaroubaceae)                                                                                                                                                                   | Oncological disease   |
| Bryostatins 1          | Phase II          | ND    | Bugula neritina (Bugulidae)                                                                                                                                                                              | Oncological disease   |
| Cabazitaxel            | Phase III         | ND    | Taxus wallichiana (Taxaceae); Taxus brevifolia (Taxaceae)                                                                                                                                                | Oncological disease   |
| Calanolide A           | In Clinical Trial | N     | Calophyllum (Calophyllaceae)                                                                                                                                                                             | Antiviral             |
| Camptothecin           | In Clinical Trial | N     | Camptotheca acuminata (Cornaceae); Mappia foetida (Icacinaceae); Ophiorrhiza pumila (Rubiaceae)                                                                                                          | Oncological disease   |
| Canertinib             | Phase II          | ND    | Zea mays (Poaceae); Cocos nucifera (Arecaceae); Spinacia oleracea (Amaranthaceae); Pisum sativum (Fabaceae)                                                                                              | Anticancer            |
| Cannabidiol            | Phase II          | N     | Cannabis sativa (Cannabaceae)                                                                                                                                                                            | Anxiety and psychosis |
| Capsaicin              | Phase II          | N     | Capsicum annuum (Solanaceae); Capsicum frutescens (Solanaceae); Zingiber officinale (Zingiberaceae); Capsicum annuum (Solanaceae); Capsicum frutescens (Solanaceae); Zingiber officinale (Zingiberaceae) | Neurological disease  |
| Carfilzomib            | Phase III         | S/NM  | Actinomyces (Actinomycetaceae)                                                                                                                                                                           | Multiple myeloma      |
| Castor oil             | In Clinical Trial | N     | Ricinus communis (Euphorbiaceae)                                                                                                                                                                         | Constipation          |
| CBR-2092               | Phase I           | ND    | Amycolatopsis mediterranei (Pseudonocardiaceae); Amycolatopsis rifamycinica (Pseudonocardiaceae)                                                                                                         | Antibacterial         |
| Cediranib              | Phase II          | ND    | Zea mays (Poaceae); Cocos nucifera (Arecaceae); Spinacia oleracea (Amaranthaceae); Pisum sativum (Fabaceae)                                                                                              | Anticancer            |
| Ceftaroline acetate    | Phase II          | ND    | Acremonium chrysogenum (Acremonium); Amycolatopsis lactamdurans (Pseudonocardiaceae); Emericellopsis minima (Emericellopsis); Streptomyces clavuligerus (Streptomycetaceae)                              | Antibacterial         |
| Ceftizoxime alapivoxil | In Clinical Trial | ND    | Acremonium chrysogenum (Acremonium); Amycolatopsis lactamdurans (Pseudonocardiaceae); Emericellopsis minima (Emericellopsis); Streptomyces                                                               | Antibacterial         |

|                              |                   |       |                                                                                                                                                                             |                                                 |
|------------------------------|-------------------|-------|-----------------------------------------------------------------------------------------------------------------------------------------------------------------------------|-------------------------------------------------|
|                              |                   |       | clavuligerus (Streptomycetaceae)                                                                                                                                            |                                                 |
| Ceftobiprole                 | Phase III         | ND    | Acremonium chrysogenum (Acremonium); Amycolatopsis lactamdurans (Pseudonocardiaceae); Emericellopsis minima (Emericellopsis); Streptomyces clavuligerus (Streptomycetaceae) | Antibacterial                                   |
| Cematodin                    | Phase II          | ND    | Dolabella auricularia (Aplysiidae); Symploca sp. VP642a (Symploca); Symploca sp. VP642b (Symploca); Symploca sp. VP642c (Symploca)                                          | Oncological disease                             |
| CEP-1347                     | Phase III         | ND    | Lentzea albida (Actinosynnemataceae)                                                                                                                                        | Neurological disease                            |
| CEP-7055                     | Phase I           | ND    | Lentzea albida (Actinosynnemataceae)                                                                                                                                        | Oncological disease                             |
| Cerivastatin                 | In Clinical Trial | S*/NM | Pseudonocardia autotrophica (Pseudonocardiaceae); Penicillium brevicompactum (Trichocomaceae); Penicillium citrinum (Trichocomaceae)                                        | Cardiovascular disease                          |
| Cethromycin                  | Phase III         | ND    | Saccharopolyspora erythraea (Pseudonocardiaceae)                                                                                                                            | Antibacterial                                   |
| CGS-27023A                   | Phase II          | S*/NM | Homo sapiens (Hominidae)                                                                                                                                                    | Cancer                                          |
| CGX-1160                     | Phase II          | N     | Conus geographus (Conidae)                                                                                                                                                  | Neurological disease                            |
| Civamide                     | Phase III         | ND    | Capsicum annuum (Solanaceae); Capsicum frutescens (Solanaceae); Zingiber officinale (Zingiberaceae)                                                                         | Neurological disease                            |
| CKD-732                      | In Clinical Trial | ND    | Aspergillus fumigatus (Trichocomaceae)                                                                                                                                      | Oncological disease                             |
| CM101/ZDO101                 | Phase II          | N     | Streptococcus (Streptococcaceae)                                                                                                                                            | Anticancer                                      |
| CMB 401                      | Phase II          | ND    | Micromonospora echinospora (Micromonosporaceae)                                                                                                                             | Oncological disease                             |
| CNF-1010                     | In Clinical Trial | ND    | Streptomyces hygrosopicus subsp. geldanus (Streptomycetaceae)                                                                                                               | Oncological disease                             |
| COL-3                        | Phase II          | S*/NM | Homo sapiens (Hominidae)                                                                                                                                                    | Cancer                                          |
| Combretastatin A-4 phosphate | Phase III         | ND    | Combretum (Combretaceae)                                                                                                                                                    | Oncological disease                             |
| Conantokin-G                 | Phase II          | N     | Conus geographus (Conidae)                                                                                                                                                  | Neurological disease                            |
| Conantokin-T                 | Phase II          | N     | Conus tulipa (Conidae)                                                                                                                                                      | Neurological disease                            |
| CP 7075                      | Phase II          | ND    | Cannabis sativa (Cannabaceae)                                                                                                                                               | Neurological disease                            |
| CP-724714                    | Phase I           | ND    | Zea mays (Poaceae); Cocos nucifera (Arecaceae); Spinacia oleracea (Amaranthaceae); Pisum sativum (Fabaceae)                                                                 | Anticancer                                      |
| CP-751,871                   | Phase III         | ND    | Lentzea albida (Actinosynnemataceae)                                                                                                                                        | Oncological disease                             |
| Crofelemer                   | Phase III         | N     | Croton lechleri (Euphorbiaceae)                                                                                                                                             | Antiviral                                       |
| Cryptophycin-52              | Phase II          | ND    | Taxus wallichiana (Taxaceae); Taxus brevifolia (Taxaceae); Taxus baccata (Taxaceae); Corylus avellana (Betulaceae); Seimatoantlerium tepuiense (Amphisphaeriaceae)          | Anticancer                                      |
| Curcumin                     | Phase II          | ND    | Curcuma longa (Zingiberaceae)                                                                                                                                               | Oncological disease                             |
| DA-5018                      | Phase II          | ND    | Capsicum annuum (Solanaceae); Capsicum frutescens (Solanaceae); Zingiber officinale (Zingiberaceae)                                                                         | Neurological disease                            |
| DA-6034                      | Phase II          | ND    | Artemisia argyi (Asteraceae)                                                                                                                                                | Immunological, inflammatory and related disease |
| Daidzein                     | Phase I           | N     | Glycine max (Fabaceae); Cicer arietinum (Fabaceae); Cullen corylifolium (Fabaceae); Genista tinctoria                                                                       | Oncological disease                             |

|                                  |                   |    |                                                                                                                                                                                                                                                                                                                                                                                                                                                                    |                      |
|----------------------------------|-------------------|----|--------------------------------------------------------------------------------------------------------------------------------------------------------------------------------------------------------------------------------------------------------------------------------------------------------------------------------------------------------------------------------------------------------------------------------------------------------------------|----------------------|
|                                  |                   |    | (Fabaceae); <i>Lens culinaris</i> (Fabaceae); <i>Medicago sativa</i> (Fabaceae); <i>Phaseolus coccineus</i> (Fabaceae); <i>Phaseolus lunatus</i> (Fabaceae); <i>Pisum sativum</i> (Fabaceae); <i>Pueraria</i> (Fabaceae); <i>Sophora prostrata</i> (Fabaceae); <i>Trifolium pratense</i> (Fabaceae); <i>Vicia faba</i> (Fabaceae); <i>Vigna angularis</i> (Fabaceae); <i>Vigna radiata</i> (Fabaceae); <i>Vigna unguiculata</i> ssp. <i>unguiculata</i> (Fabaceae) |                      |
| Dalbavancin                      | Phase III         | ND | <i>Nonomuraea</i> sp. ATCC 39727 (Streptosporangiaceae)                                                                                                                                                                                                                                                                                                                                                                                                            | Antibacterial        |
| Dapagliflozin                    | Phase III         | ND | <i>Malus x domestica</i> (Rosaceae)                                                                                                                                                                                                                                                                                                                                                                                                                                | Neurological disease |
| Datelliptium acetate             | Phase II          | ND | <i>Aspidosperma</i> (Apocynaceae); Apocynaceae (Apocynaceae); <i>Ochrosia elliptica</i> (Apocynaceae); <i>Strychnos</i> (Loganiaceae); <i>Tabernaemontana</i> (Apocynaceae)                                                                                                                                                                                                                                                                                        | Oncological disease  |
| Debio 9902                       | Phase II          | ND | <i>Huperzia serrata</i> (Lycopodiaceae)                                                                                                                                                                                                                                                                                                                                                                                                                            | Neurological disease |
| Debio-025                        | Phase II          | ND | <i>Claviceps purpurea</i> (Clavicipitaceae); <i>Cylindrocarpon lucidum</i> (Nectriaceae); <i>Tolypocladium inflatum</i> (Clavicipitaceae)                                                                                                                                                                                                                                                                                                                          | Antiviral            |
| Deforolimus                      | Phase III         | ND | <i>Streptomyces hygroscopicus</i> (Streptomycetaceae)                                                                                                                                                                                                                                                                                                                                                                                                              | Oncological disease  |
| Dehydellone                      | Phase I           | ND | <i>Sorangium cellulosum</i> (Polyangiaceae)                                                                                                                                                                                                                                                                                                                                                                                                                        | Oncological disease  |
| Dehydrodidemnin B                | Phase II          | N  | <i>Aplidium</i> (Polyclinidae); <i>Trididemnum</i> (Didemnidae)                                                                                                                                                                                                                                                                                                                                                                                                    | Oncological disease  |
| Devacade                         | In Clinical Trial | ND | <i>Aspergillus alliaceus</i> (Trichocomaceae)                                                                                                                                                                                                                                                                                                                                                                                                                      | Neurological disease |
| DHA-paclitaxel                   | Phase III         | ND | <i>Taxus wallichiana</i> (Taxaceae); <i>Taxus brevifolia</i> (Taxaceae)                                                                                                                                                                                                                                                                                                                                                                                            | Oncological disease  |
| Diascorbate salt                 | Phase II          | ND | <i>Streptomyces aureofaciens</i> (Streptomycetaceae)                                                                                                                                                                                                                                                                                                                                                                                                               | Antifungal           |
| Didemnin B                       | In Clinical Trial | N  | <i>Trididemnum</i> (Didemnidae)                                                                                                                                                                                                                                                                                                                                                                                                                                    | Oncological disease  |
| Diflomotecan                     | Phase II          | ND | <i>Camptotheca acuminata</i> (Cornaceae); <i>Mappia foetida</i> (Icacinaeae); <i>Ophiorrhiza pumila</i> (Rubiaceae)                                                                                                                                                                                                                                                                                                                                                | Oncological disease  |
| Dimethyl succinyl betulinic acid | Phase II          | N  | <i>Syzygium cumini</i> (Myrtaceae)                                                                                                                                                                                                                                                                                                                                                                                                                                 | Antiviral            |
| Dirithromycin                    | In Clinical Trial | ND | <i>Saccharopolyspora erythraea</i> (Pseudonocardiaceae)                                                                                                                                                                                                                                                                                                                                                                                                            | Antibacterial        |
| Discodermolide                   | In Clinical Trial | ND | <i>Discodermia dissoluta</i> (Theonellidae)                                                                                                                                                                                                                                                                                                                                                                                                                        | Oncological disease  |
| Ditalin                          | In Clinical Trial | N  | <i>Digitalis purpurea</i> (Plantaginaceae)                                                                                                                                                                                                                                                                                                                                                                                                                         | Cancer               |
| DMBX-anabaseine                  | Phase II          | ND | <i>Amphiporus angulatus</i> (Amphiporidae); <i>Amphiporus lactifloreus</i> (Amphiporidae); <i>Paranemertes peregrina</i> (Paranemertes)                                                                                                                                                                                                                                                                                                                            | Neurological disease |
| Dolastatin 10                    | In Clinical Trial | ND | <i>Symploca</i> sp. VP642a (Symploca); <i>Symploca</i> sp. VP642b (Symploca); <i>Symploca</i> sp. VP642c (Symploca); <i>Symploca hydnoidea</i> (Symploca); <i>Dolabella auricularia</i> (Aplysiidae)                                                                                                                                                                                                                                                               | Oncological disease  |
| Dolastatin 15                    | In Clinical Trial | N  | <i>Symploca</i> sp. VP642a (Symploca); <i>Symploca</i> sp. VP642b (Symploca); <i>Symploca</i> sp. VP642c (Symploca); <i>Dolabella auricularia</i> (Aplysiidae)                                                                                                                                                                                                                                                                                                     | Oncological disease  |

|                          |                   |    |                                                                                                                   |                                                 |
|--------------------------|-------------------|----|-------------------------------------------------------------------------------------------------------------------|-------------------------------------------------|
| DRF-1042                 | Phase II          | ND | Camptotheca acuminata (Cornaceae); Mappia foetida (Icacinaceae); Ophiorrhiza pumila (Rubiaceae)                   | Oncological disease                             |
| E7107                    | Phase I           | ND | Streptomyces platensis (Streptomycetaceae)                                                                        | Oncological disease                             |
| E7974                    | Phase I           | ND | Cymbastela (Axinellidae); Hemiasterella (Hemiasterellidae); Hemiasterella (Hemiasterellidae)                      | Oncological disease                             |
| EC145                    | Phase I           | ND | Catharanthus roseus (Apocynaceae)                                                                                 | Oncological disease                             |
| ECO-4601                 | Phase II          | ND | Micromonospora aurantiaca (Micromonosporaceae)                                                                    | Oncological disease                             |
| Edotecarin               | Phase III         | ND | Lentzea albida (Actinosynnemataceae)                                                                              | Oncological disease                             |
| Elomotecan               | Phase I           | ND | Camptotheca acuminata (Cornaceae); Mappia foetida (Icacinaceae); Ophiorrhiza pumila (Rubiaceae)                   | Oncological disease                             |
| Elsamitrucin             | Phase II          | ND | Streptomyces chartreusis (Streptomycetaceae)                                                                      | Oncological disease                             |
| EndoTAG-1                | Phase II          | ND | Taxus wallichiana (Taxaceae); Taxus brevifolia (Taxaceae)                                                         | Oncological disease                             |
| Enzastaurin              | Phase III         | ND | Lentzea albida (Actinosynnemataceae)                                                                              | Oncological disease                             |
| EP-420                   | Phase II          | ND | Saccharopolyspora erythraea (Pseudonocardiaceae)                                                                  | Antibacterial                                   |
| Epigallocatechin gallate | Phase II          | N  | Camellia sinensis (Theaceae)                                                                                      | Oncological disease                             |
| Epothilone D             | Phase II          | ND | Sorangium cellulosum (Polyangiaceae)                                                                              | Oncological disease                             |
| Eritoran                 | Phase III         | ND | Rhodobacter sphaeroides (Rhodobacteraceae)                                                                        | Antibacterial                                   |
| Everolimus               | Phase III         | ND | Streptomyces hygroscopicus (Streptomycetaceae)                                                                    | Oncological disease                             |
| Exatecan                 | Phase III         | ND | Camptotheca acuminata (Cornaceae); Mappia foetida (Icacinaceae); Ophiorrhiza pumila (Rubiaceae)                   | Oncological disease                             |
| Exendin                  | Phase II          | ND | Homo sapiens (Hominidae)                                                                                          | Diabetes                                        |
| Fara/Bryostatin 1        | Phase I           | N  | Bugula neritina (Bugulidae)                                                                                       | Oncological disease                             |
| Faropenem daloxate       | Phase III         | ND | Streptomyces cattleya (Streptomycetaceae)                                                                         | Antibacterial                                   |
| Flavopiridol             | Phase III         | ND | Meliaceae (Meliaceae); Dysoxylum (Meliaceae)                                                                      | Oncological disease                             |
| Fostriecin               | Phase I           | N  | Streptomyces pulveraceus (Streptomycetaceae)                                                                      | Oncological disease                             |
| Friulimicin B            | Phase I           | N  | Actinoplanes friuliensis (Micromonosporaceae)                                                                     | Antibacterial                                   |
| Galarubicin              | In Clinical Trial | ND | Streptomyces peucetius (Streptomycetaceae)                                                                        | Oncological disease                             |
| Gantacurium chloride     | In Clinical Trial | ND | Strychnos (Loganiaceae); Anomospermum grandifolium (Menispermaceae); Chondrodendron tomentosum (Menispermaceae)   | Neurological disease                            |
| Genistein                | Phase II          | ND | Glycine max (Fabaceae)                                                                                            | Oncological disease                             |
| Gimatecan                | Phase II          | ND | Camptotheca acuminata (Cornaceae); Mappia foetida (Icacinaceae); Ophiorrhiza pumila (Rubiaceae)                   | Oncological disease                             |
| Girolline                | In Clinical Trial | N  | Cymbastela (Axinellidae)                                                                                          | Oncological disease                             |
| GL-331                   | Phase II          | ND | Dyosma pleiantha (Berberidaceae); Podophyllum peltatum (Berberidaceae); Sinopodophyllum hexandrum (Berberidaceae) | Oncological disease                             |
| GPI-0100                 | In Clinical Trial | ND | Quillaja saponaria (Quillajaceae)                                                                                 | Immunological, inflammatory and related disease |
| GSK 565154               | In Clinical       | ND | Clitopilus scyphoides (Entolomataceae)                                                                            | Antibacterial                                   |

|                       |                   |       |                                                                                                                                                                                                                                                                                          |                                      |
|-----------------------|-------------------|-------|------------------------------------------------------------------------------------------------------------------------------------------------------------------------------------------------------------------------------------------------------------------------------------------|--------------------------------------|
|                       | Trial             |       |                                                                                                                                                                                                                                                                                          |                                      |
| GSK 742510            | In Clinical Trial | ND    | Clitopilus scyphoides (Entolomataceae)                                                                                                                                                                                                                                                   | Antibacterial                        |
| GSK-189075/KGT-1681   | Phase II          | ND    | Malus x domestica (Rosaceae)                                                                                                                                                                                                                                                             | Neurological disease                 |
| GW640385              | Phase II          | S/NM  | Human immunodeficiency virus 1 (Retroviridae)                                                                                                                                                                                                                                            | Antiviral                            |
| GW823093C             | Phase II          | S*/NM | Homo sapiens (Hominidae)                                                                                                                                                                                                                                                                 | Diabetes mellitus                    |
| Halichondrin B        | In Clinical Trial | N     | Lissodendoryx (Coelosphaeridae); Halichondria okadaei (Halichondriidae)                                                                                                                                                                                                                  | Oncological disease                  |
| Heparvit              | Phase II          | ND    | Apium graveolens var. dulce (Apiaceae); Fraxinus ornus (Oleaceae); Galium odoratum (Rubiaceae); Matricaria recutita (Asteraceae); Petroselinum crispum (Apiaceae)                                                                                                                        | Antiviral                            |
| HKI-272               | Phase II          | ND    | Zea mays (Poaceae); Cocos nucifera (Arecaceae); Spinacia oleracea (Amaranthaceae); Pisum sativum (Fabaceae)                                                                                                                                                                              | Anticancer                           |
| Homocamptothecin      | Phase I           | ND    | Camptotheca acuminata (Cornaceae); Mappia foetida (Icacinaeae); Ophiorrhiza pumila (Rubiaceae)                                                                                                                                                                                           | Oncological disease                  |
| Homoharringtonine     | Phase III         | ND    | Cephalotaxus fortunei (Cephalotaxaceae); Cephalotaxus harringtonia (Cephalotaxaceae)                                                                                                                                                                                                     | Oncological disease                  |
| HTI-286               | Phase II          | ND    | Cymbastela (Axinellidae); Hemiasterella (Hemiasterellidae)                                                                                                                                                                                                                               | Oncological disease                  |
| IdB 1016              | Phase II          | ND    | Silybum marianum (Asteraceae)                                                                                                                                                                                                                                                            | Oncological disease                  |
| IDEC-132              | Phase II          | ND    | Camptotheca acuminata (Cornaceae); Mappia foetida (Icacinaeae); Ophiorrhiza pumila (Rubiaceae)                                                                                                                                                                                           | Oncological disease                  |
| IDN-6556              | Phase II          | S*/NM | Hepatitis C virus (Flaviviridae)                                                                                                                                                                                                                                                         | Hepatitis C                          |
| Ilepatril             | Phase III         | ND    | Bothrops jararaca (Viperidae)                                                                                                                                                                                                                                                            | Cardiovascular and metabolic disease |
| ILX651                | Phase I           | ND    | Dolabella auricularia (Aplysiidae)                                                                                                                                                                                                                                                       | Anticancer                           |
| IM862                 | Phase III         | N     | Bos taurus (Bovidae)                                                                                                                                                                                                                                                                     | Anticancer                           |
| IMGN-242              | Phase II          | ND    | Anomodon attenuatus (Anomodontaceae); Claopodium crispifolium (Leskeaceae)                                                                                                                                                                                                               | Oncological disease                  |
| IMGN-901              | Phase I           | ND    | Anomodon attenuatus (Anomodontaceae); Claopodium crispifolium (Leskeaceae); Anomodon attenuatus (Anomodontaceae); Claopodium crispifolium (Leskeaceae)                                                                                                                                   | Oncological disease                  |
| Incyclinide           | In Clinical Trial | ND    | Streptomyces aureofaciens (Streptomycetaceae); Streptomyces viridifaciens (Streptomycetaceae)                                                                                                                                                                                            | Antibacterial                        |
| Indirubin             | Phase II          | N     | Indigofera tinctoria (Fabaceae); Isatis tinctoria (Brassicaceae)                                                                                                                                                                                                                         | Oncological disease                  |
| Indole-3-carbinol     | Phase I           | N     | Brassica oleracea var. acephala (Brassicaceae); Brassica oleracea var. botrytis (Brassicaceae); Brassica oleracea var. capitata (Brassicaceae); Brassica oleracea var. gemmifera (Brassicaceae); Brassica oleracea var. italica (Brassicaceae); Brassica rapa subsp. Rapa (Brassicaceae) | Oncological disease                  |
| Ingenol 3-angelate    | Phase II          | ND    | Euphorbia esula (Euphorbiaceae); Euphorbia peplus (Euphorbiaceae); Euphorbia serrata (Euphorbiaceae)                                                                                                                                                                                     | Oncological disease                  |
| Inotuzumab ozogamicin | Phase III         | ND    | Micromonospora echinospora (Micromonosporaceae)                                                                                                                                                                                                                                          | Oncological disease                  |

|                     |                   |      |                                                                                                                                                                                                                                              |                                                 |
|---------------------|-------------------|------|----------------------------------------------------------------------------------------------------------------------------------------------------------------------------------------------------------------------------------------------|-------------------------------------------------|
| IPL-512,602         | Phase II          | ND   | Petrosia (Petrosiidae)                                                                                                                                                                                                                       | Inflammatory disease                            |
| IPL512602           | Phase II          | ND   | Petrosia (Petrosiidae)                                                                                                                                                                                                                       | Asthma                                          |
| IPL-550,260         | Phase I           | ND   | Petrosia (Petrosiidae)                                                                                                                                                                                                                       | Inflammatory disease                            |
| IPL-576,092         | Phase II          | ND   | Petrosia (Petrosiidae)                                                                                                                                                                                                                       | Inflammatory disease                            |
| Irofulven           | Phase III         | ND   | Omphalotus japonicus (Omphalotaceae); Omphalotus illudens (Omphalotaceae); Omphalotus nidiformis (Omphalotaceae); Omphalotus olivascens var. indigo (Omphalotaceae)                                                                          | Oncological disease                             |
| ISA247              | Phase II          | ND   | Tolypocladium inflatum (Clavicipitaceae)                                                                                                                                                                                                     | Transplantation                                 |
| ISA-247             | Phase II          | ND   | Claviceps purpurea (Clavicipitaceae); Cyllindrocarpon lucidum (Nectriaceae); Tolypocladium inflatum (Clavicipitaceae); Claviceps purpurea (Clavicipitaceae); Cyllindrocarpon lucidum (Nectriaceae); Tolypocladium inflatum (Clavicipitaceae) | Immunological, inflammatory and related disease |
| Isochlorogenic acid | Phase I           | N    | Inula britannica (Asteraceae)                                                                                                                                                                                                                | Antiviral                                       |
| Isofagomine         | Phase II          | ND   | Lendenfeldia chondrodes (Thorectidae); Morus alba (Moraceae); Streptomyces lavendulae (Streptomycetaceae)                                                                                                                                    | Cardiovascular and metabolic disease            |
| Isothiocynate allyl | In Clinical Trial | N    | Brassica nigra (Brassicaceae)                                                                                                                                                                                                                | Flavoring agents                                |
| JC-9                | Phase II          | ND   | Curcuma longa (Zingiberaceae)                                                                                                                                                                                                                | Anticancer                                      |
| Kahalalide F        | Phase II          | ND   | Bryopsis pennata (Bryopsidaceae); Elysia rufescens (Placobranchidae)                                                                                                                                                                         | Oncological disease                             |
| KRN-5500            | Phase II          | ND   | Streptomyces alanosinicus (Streptomycetaceae)                                                                                                                                                                                                | Neurological disease                            |
| KRN633              | Phase I           | ND   | Zea mays (Poaceae); Cocos nucifera (Arecaceae); Spinacia oleracea (Amaranthaceae); Pisum sativum (Fabaceae)                                                                                                                                  | Anticancer                                      |
| KRN-7000            | In Clinical Trial | ND   | Agelas mauritiana (Agelasidae)                                                                                                                                                                                                               | Oncological disease                             |
| KRX-0601            | Phase II          | ND   | Lentzea albida (Actinosynnemataceae)                                                                                                                                                                                                         | Oncological disease                             |
| KW-2189             | Phase II          | ND   | Streptomyces sp. (Streptomycetaceae)                                                                                                                                                                                                         | Oncological disease                             |
| L-744832            | In Clinical Trial | S/NM | Homo sapiens (Hominidae)                                                                                                                                                                                                                     | Anticancer                                      |
| L-778123            | In Clinical Trial | S/NM | Homo sapiens (Hominidae)                                                                                                                                                                                                                     | Anticancer                                      |
| LAF-389             | Phase I           | ND   | Ancorinidae (Ancorinidae); Myxococcus virescens (Myxococcaceae)                                                                                                                                                                              | Oncological disease                             |
| L-annamycin         | Phase II          | ND   | Streptomyces peucetius (Streptomycetaceae)                                                                                                                                                                                                   | Oncological disease                             |
| Larotaxel dehydrate | Phase III         | ND   | Taxus wallichiana (Taxaceae); Taxus brevifolia (Taxaceae)                                                                                                                                                                                    | Oncological disease                             |
| LBM415              | Phase III         | ND   | Streptomyces (Streptomycetaceae)                                                                                                                                                                                                             | Antibacterial                                   |
| Lestaurtinib        | Phase III         | ND   | Lentzea albida (Actinosynnemataceae)                                                                                                                                                                                                         | Oncological disease                             |
| Lobeline            | Phase II          | N    | Lobelia inflata (Campanulaceae)                                                                                                                                                                                                              | Neurological disease                            |
| Lonafarnib          | In Clinical       | S/NM | Homo sapiens (Hominidae)                                                                                                                                                                                                                     | Anticancer                                      |

|                        | Trial             |       |                                                                                                                                      |                                      |
|------------------------|-------------------|-------|--------------------------------------------------------------------------------------------------------------------------------------|--------------------------------------|
| LU-103793              | In Clinical Trial | ND    | Symploca sp. VP642a (Symploca); Symploca sp. VP642b (Symploca); Symploca sp. VP642c (Symploca); Dolabella auricularia (Aplysiidae)   | Oncological disease                  |
| Lurtotecan             | Phase II          | ND    | Camptotheca acuminata (Cornaceae); Mappia foetida (Icacinaceae); Ophiorrhiza pumila (Rubiaceae)                                      | Oncological disease                  |
| Lyostaphin             | Phase II          | N     | Staphylococcus simulans (Staphylococcaceae)                                                                                          | Antibiotic                           |
| MAG-CPT                | Phase I           | ND    | Camptotheca acuminata (Cornaceae); Mappia foetida (Icacinaceae); Ophiorrhiza pumila (Rubiaceae)                                      | Oncological disease                  |
| Manoalide              | Phase II          | N     | Luffariella (Thorectidae)                                                                                                            | Inflammatory disease                 |
| Marimastat             | In Clinical Trial | S/NM  | Homo sapiens (Hominidae)                                                                                                             | Anticancer                           |
| Maytansine             | Phase II          | N     | Maytenus (Celastraceae)                                                                                                              | Oncological disease                  |
| MBI-3253               | Phase II          | ND    | Castanospermum australe (Fabaceae)                                                                                                   | Antiviral                            |
| MC-1                   | Phase III         | ND    | Zea mays (Poaceae)                                                                                                                   | Cardiovascular and metabolic disease |
| ME-1036                | Phase I           | ND    | Streptomyces cattleya (Streptomycetaceae)                                                                                            | Antibacterial                        |
| Metastat               | Phase II          | S/NM  | Streptomyces (Streptomycetaceae)                                                                                                     | Anticancer                           |
| Methopterosin          | Phase II          | N     | Pseudopterogorgia elisabethae (Gorgoniidae)                                                                                          | Inflammatory disease                 |
| Methylnaltrexone       | Phase III         | ND    | Papaver somniferum (Papaveraceae)                                                                                                    | Neurological disease                 |
| Mevastatin             | In Clinical Trial | N     | Pseudonocardia autotrophica (Pseudonocardiaceae); Penicillium brevicompactum (Trichocomaceae); Penicillium citrinum (Trichocomaceae) | Cardiovascular disease               |
| Midostaurin            | Phase II          | ND    | Lentzea albida (Actinosynnemataceae)                                                                                                 | Oncological disease                  |
| Migalastat             | Phase II          | ND    | Streptomyces lydicus (Streptomycetaceae)                                                                                             | Cardiovascular and metabolic disease |
| Milataxel              | Phase II          | ND    | Taxus wallichiana (Taxaceae); Taxus brevifolia (Taxaceae)                                                                            | Oncological disease                  |
| Mitemcinal             | Phase II          | ND    | Saccharopolyspora erythraea (Pseudonocardiaceae)                                                                                     | Cardiovascular and metabolic disease |
| Mithramycin            | In Clinical Trial | N     | Streptomyces (Streptomycetaceae)                                                                                                     | Oncological disease                  |
| MK-0431                | Phase II          | S*/NM | Homo sapiens (Hominidae)                                                                                                             | Diabetes mellitus                    |
| MK-944a                | Phase I           | ND    | Actinomyces (Actinomycetaceae)                                                                                                       | Anti-HIV                             |
| MLN2704                | Phase II          | ND    | Anomodon attenuatus (Anomodontaceae); Claopodium crispifolium (Leskeaceae)                                                           | Oncological disease                  |
| MMI270                 | In Clinical Trial | S/NM  | Homo sapiens (Hominidae)                                                                                                             | Anticancer                           |
| Moli1901               | Phase II          | N     | Streptomyces cinnamoneus (Streptomycetaceae)                                                                                         | Antibacterial                        |
| Moranoline             | Phase I           | ND    | Lendenfeldia chondrodes (Thorectidae); Morus alba (Moraceae); Streptomyces lavendulae (Streptomycetaceae)                            | Cardiovascular and metabolic disease |
| Morphine-6-glucuronide | Phase III         | ND    | Papaver somniferum (Papaveraceae)                                                                                                    | Neurological disease                 |
| NB-506                 | Phase II          | ND    | Streptomyces sp. (Streptomycetaceae)                                                                                                 | Oncological disease                  |
| Nemorubicin            | Phase II          | ND    | Streptomyces peucetius (Streptomycetaceae)                                                                                           | Oncological disease                  |

|                           |                   |       |                                                                                                                        |                                                 |
|---------------------------|-------------------|-------|------------------------------------------------------------------------------------------------------------------------|-------------------------------------------------|
| NIM 811                   | Phase I           | ND    | Claviceps purpurea (Clavicipitaceae); Cyindrocarpon lucidum (Nectriaceae); Tolypocladium inflatum (Clavicipitaceae)    | Antiviral                                       |
| NK-105                    | Phase II          | ND    | Taxus wallichiana (Taxaceae); Taxus brevifolia (Taxaceae)                                                              | Oncological disease                             |
| NK-611                    | Phase II          | ND    | Dysosma pleiantha (Berberidaceae); Podophyllum peltatum (Berberidaceae); Sinopodophyllum hexandrum (Berberidaceae)     | Oncological disease                             |
| Noscapine                 | Phase I           | ND    | Papaver somniferum (Papaveraceae)                                                                                      | Oncological disease                             |
| NPI-0052                  | Phase I           | ND    | Salinispora tropica (Micromonosporaceae)                                                                               | Oncological disease                             |
| NPI-2358                  | Phase I           | ND    | Aspergillus ustus (Trichocomaceae)                                                                                     | Oncological disease                             |
| NSC 630176                | Phase II          | N     | Chromobacterium violaceum (Neisseriaceae)                                                                              | Oncological disease                             |
| NSC 650426                | In Clinical Trial | ND    | Streptomyces alanosinicus (Streptomycetaceae)                                                                          | Oncological disease                             |
| NV-52                     | Phase II          | N     | Glycine max (Fabaceae)                                                                                                 | Immunological, inflammatory and related disease |
| NVP-AUY922                | Phase I           | ND    | Streptomyces hygroscopicus subsp. geldanus (Streptomycetaceae)                                                         | Anticancer                                      |
| NVP-DPP728                | Phase II          | S*/NM | Homo sapiens (Hominidae)                                                                                               | Diabetes mellitus                               |
| NVP-LAF237                | Phase II          | S*/NM | Homo sapiens (Hominidae)                                                                                               | Diabetes mellitus                               |
| NVP-LAQ824                | Phase I           | ND    | Helicoma ambiens (Tubeufiaceae); Pseudoceratinidae (Pseudoceratinidae); Streptomyces hygroscopicus (Streptomycetaceae) | Oncological disease                             |
| NXL-103                   | Phase II          | ND    | Streptomyces pristinaespiralis (Streptomycetaceae); Streptomyces virginiae (Streptomycetaceae)                         | Antibacterial                                   |
| Obatoclox                 | Phase II          | ND    | Serratia marcescens (Enterobacteriaceae)                                                                               | Oncological disease                             |
| Omacetaxine mepesuccinate | Phase III         | ND    | Cephalotaxus fortunei (Cephalotaxaceae)                                                                                | Anticancer                                      |
| Omapatrilat               | Phase II          | S*/NM | Bothrops jararaca (Viperidae)                                                                                          | Hypertension                                    |
| Omega-conotoxin CVID      | Phase II          | N     | Conus catus (Conidae)                                                                                                  | Neurological disease                            |
| Omtriprolide              | In Clinical Trial | ND    | Tripterygium wilfordii (Celastraceae)                                                                                  | Oncological disease                             |
| Oritavancin               | Phase II          | ND    | Amicolatopsis orientalis (Pseudonocardiaceae); Amicolatopsis orientalis (Pseudonocardiaceae)                           | Antibacterial                                   |
| Ortataxel                 | Phase II          | ND    | Taxus wallichiana (Taxaceae); Taxus brevifolia (Taxaceae)                                                              | Oncological disease                             |
| OSI-930                   | Phase I           | ND    | Zea mays (Poaceae); Cocos nucifera (Arecaceae); Spinacia oleracea (Amaranthaceae); Pisum sativum (Fabaceae)            | Anticancer                                      |
| OXi4503                   | Phase I           | ND    | Combretum (Combretaceae)                                                                                               | Oncological disease                             |
| Oxocalanolide             | Phase I           | ND    | Calophyllum (Calophyllaceae)                                                                                           | Antiviral                                       |
| P57A3                     | Phase II          | N     | Hoodia gordonii (Apocynaceae)                                                                                          | Cardiovascular disease                          |
| PA-1050040                | Phase I           | ND    | Syzygium claviflorum (Myrtaceae)                                                                                       | Anti-HIV                                        |
| Paclitaxel poliglumex     | Phase III         | ND    | Taxus wallichiana (Taxaceae); Taxus brevifolia (Taxaceae)                                                              | Oncological disease                             |
| Paclitaxel/Bryostatin     | Phase II          | N     | Bugula neritina (Bugulidae); Taxus wallichiana                                                                         | Oncological disease                             |



|                          |                   |      |                                                                                                                                                                                                                                                                                                                                                                                                                                                                                                                                                                                                      |                                      |
|--------------------------|-------------------|------|------------------------------------------------------------------------------------------------------------------------------------------------------------------------------------------------------------------------------------------------------------------------------------------------------------------------------------------------------------------------------------------------------------------------------------------------------------------------------------------------------------------------------------------------------------------------------------------------------|--------------------------------------|
| 1                        |                   |      | (Taxaceae); <i>Taxus brevifolia</i> (Taxaceae)                                                                                                                                                                                                                                                                                                                                                                                                                                                                                                                                                       |                                      |
| Panobinostat             | Phase III         | ND   | <i>Aplysinella rhax</i> (Aplysinellidae)                                                                                                                                                                                                                                                                                                                                                                                                                                                                                                                                                             | Oncological disease                  |
| Patupilone               | Phase III         | ND   | <i>Sorangium cellulosum</i> (Polyangiaceae)                                                                                                                                                                                                                                                                                                                                                                                                                                                                                                                                                          | Oncological disease                  |
| PD-332991                | Phase I           | ND   | <i>Zea mays</i> (Poaceae); <i>Cocos nucifera</i> (Arecaceae); <i>Spinacia oleracea</i> (Amaranthaceae); <i>Pisum sativum</i> (Fabaceae)                                                                                                                                                                                                                                                                                                                                                                                                                                                              | Anticancer                           |
| PDX101                   | Phase I           | ND   | <i>Streptomyces hygroscopicus</i> (Streptomycetaceae)                                                                                                                                                                                                                                                                                                                                                                                                                                                                                                                                                | Oncological disease                  |
| PEG-CPT                  | Phase II          | ND   | <i>Camptotheca acuminata</i> (Cornaceae); <i>Mappia foetida</i> (Icacinaeae); <i>Ophiorrhiza pumila</i> (Rubiaceae)                                                                                                                                                                                                                                                                                                                                                                                                                                                                                  | Oncological disease                  |
| Perillyl alcohol         | Phase II          | N    | <i>Carum carvi</i> (Apiaceae); <i>Matricaria chamomilla</i> var. <i>recutita</i> (Asteraceae); <i>Cymbopogon martinii</i> (Poaceae); <i>Juniperus sabina</i> (Cupressaceae); <i>Laurus nobilis</i> (Lauraceae); <i>Lavandula</i> (Lamiaceae); <i>Mentha spicata</i> (Lamiaceae); <i>Monarda didyma</i> (Lamiaceae); <i>Perilla frutescens</i> (Lamiaceae); <i>Salvia</i> (Lamiaceae)                                                                                                                                                                                                                 | Oncological disease                  |
| PF-3709270               | Phase I           | N    | <i>Streptomyces cattleya</i> (Streptomycetaceae)                                                                                                                                                                                                                                                                                                                                                                                                                                                                                                                                                     | Antibacterial                        |
| PF4548043                | Phase I           | ND   | <i>Saccharopolyspora erythraea</i> (Pseudonocardiaceae)                                                                                                                                                                                                                                                                                                                                                                                                                                                                                                                                              | Cardiovascular and metabolic disease |
| Phenethyl isothiocyanate | Phase I           | N    | <i>Sinapis alba</i> (Brassicaceae)                                                                                                                                                                                                                                                                                                                                                                                                                                                                                                                                                                   | Oncological disease                  |
| Phenoxodiol              | Phase III         | ND   | <i>Glycine max</i> (Fabaceae); <i>Cicer arietinum</i> (Fabaceae); <i>Cullen corylifolium</i> (Fabaceae); <i>Genista tinctoria</i> (Fabaceae); <i>Lens culinaris</i> (Fabaceae); <i>Medicago sativa</i> (Fabaceae); <i>Phaseolus coccineus</i> (Fabaceae); <i>Phaseolus lunatus</i> (Fabaceae); <i>Pisum sativum</i> (Fabaceae); <i>Pueraria</i> (Fabaceae); <i>Sophora prostrata</i> (Fabaceae); <i>Trifolium pratense</i> (Fabaceae); <i>Vicia faba</i> (Fabaceae); <i>Vigna angularis</i> (Fabaceae); <i>Vigna radiata</i> (Fabaceae); <i>Vigna unguiculata</i> ssp. <i>unguiculata</i> (Fabaceae) | Oncological disease                  |
| Phenserine tartrate      | In Clinical Trial | ND   | <i>Hippomane mancinella</i> (Euphorbiaceae); <i>Physostigma venenosum</i> (Fabaceae)                                                                                                                                                                                                                                                                                                                                                                                                                                                                                                                 | Neurological disease                 |
| PLD-118                  | Phase II          | ND   | <i>Bacillus cereus</i> (Bacillaceae)                                                                                                                                                                                                                                                                                                                                                                                                                                                                                                                                                                 | Antifungal                           |
| Plitidepsin              | Phase II          | ND   | <i>Aplidium</i> (Polyclinidae)                                                                                                                                                                                                                                                                                                                                                                                                                                                                                                                                                                       | Oncological disease                  |
| PM00104/50               | Phase I           | ND   | <i>Jorunna</i> (Kentrodorididae)                                                                                                                                                                                                                                                                                                                                                                                                                                                                                                                                                                     | Oncological disease                  |
| PM02734                  | Phase I           | ND   | <i>Bryopsis pennata</i> (Bryopsidaceae); <i>Elysia rufescens</i> (Placobranchidae)                                                                                                                                                                                                                                                                                                                                                                                                                                                                                                                   | Oncological disease                  |
| Podophyllotoxin          | Phase I           | N    | <i>Podophyllum peltatum</i> (Berberidaceae)                                                                                                                                                                                                                                                                                                                                                                                                                                                                                                                                                          | Anticancer                           |
| PPI-2458                 | In Clinical Trial | ND   | <i>Aspergillus fumigatus</i> (Trichocomaceae)                                                                                                                                                                                                                                                                                                                                                                                                                                                                                                                                                        | Oncological disease                  |
| PPL-100                  | Phase I           | S/NM | Human immunodeficiency virus 1 (Retroviridae)                                                                                                                                                                                                                                                                                                                                                                                                                                                                                                                                                        | Antiviral                            |
| Prinomastat              | Phase II          | S/NM | <i>Homo sapiens</i> (Hominidae)                                                                                                                                                                                                                                                                                                                                                                                                                                                                                                                                                                      | Early-stage cancer                   |
| Prostratin               | Phase I           | N    | Thymelaeaceae (Thymelaeaceae); <i>Homalanthus nutans</i> (Euphorbiaceae); <i>Pimelea</i> (Thymelaeaceae)                                                                                                                                                                                                                                                                                                                                                                                                                                                                                             | Antiviral                            |
| Protopanaxadiol          | In Clinical Trial | ND   | <i>Panax ginseng</i> (Araliaceae)                                                                                                                                                                                                                                                                                                                                                                                                                                                                                                                                                                    | Oncological disease                  |
| Protoveratine A          | In Clinical       | N    | <i>Veratrum album</i> (Melanthiaceae)                                                                                                                                                                                                                                                                                                                                                                                                                                                                                                                                                                | Hypertension                         |

|                        |                   |       |                                                                                                                                                                              |                                      |
|------------------------|-------------------|-------|------------------------------------------------------------------------------------------------------------------------------------------------------------------------------|--------------------------------------|
|                        | Trial             |       |                                                                                                                                                                              |                                      |
| Protoveratine B        | In Clinical Trial | N     | Veratrum album (Melanthiaceae)                                                                                                                                               | Hypertension                         |
| PS-519                 | Phase I           | ND    | Streptomyces (Streptomycetaceae)                                                                                                                                             | acute stroke                         |
| PSN9301                | Phase II          | S*/NM | Homo sapiens (Hominidae)                                                                                                                                                     | Diabetes mellitus                    |
| PTK-0796               | Phase II          | ND    | Streptomyces aureofaciens (Streptomycetaceae)                                                                                                                                | Antibacterial                        |
| Pyridoxamine           | Phase II          | ND    | Zea mays (Poaceae)                                                                                                                                                           | Cardiovascular and metabolic disease |
| PZ-601                 | Phase II          | N     | Streptomyces cattleya (Streptomycetaceae)                                                                                                                                    | Antibacterial                        |
| QS-21A                 | Phase II          | N     | Quillaja saponaria (Quillajaceae)                                                                                                                                            | Immunological disease                |
| QS-21B                 | Phase III         | N     | Quillaja saponaria (Quillajaceae)                                                                                                                                            | Immunological disease                |
| Ramoplanin             | Phase III         | ND    | Actinoplanes (Micromonosporaceae)                                                                                                                                            | Antibacterial                        |
| Rebimastat             | Phase III         | S*/NM | Homo sapiens (Hominidae)                                                                                                                                                     | Anticancer                           |
| Retaspimycin           | Phase II          | ND    | Streptomyces hygroscopicus subsp. geldanus (Streptomycetaceae)                                                                                                               | Oncological disease                  |
| RO033-4649             | Phase I           | S*/NM | Human immunodeficiency virus 1 (Retroviridae)                                                                                                                                | Antiviral                            |
| Romidepsin             | Phase III         | ND    | Chromobacterium violaceum (Neisseriaceae)                                                                                                                                    | Oncological disease                  |
| Rostafuroxin           | Phase II          | ND    | Acokanthera oblongifolia (Apocynaceae); Acokanthera oppositifolia (Apocynaceae); Acokanthera (Apocynaceae); Strophanthus gratus (Apocynaceae)                                | Cardiovascular and metabolic disease |
| Rubitecan              | Phase III         | ND    | Mappia foetida (Icacinaeae); Camptotheca acuminata (Cornaceae); Ophiorrhiza pumila (Rubiaceae)                                                                               | Anticancer                           |
| Ruboxistaurin          | Phase III         | ND    | Lentzea albida (Actinosynnemataceae)                                                                                                                                         | Cardiovascular and metabolic disease |
| RWJ-442831             | Phase I           | ND    | Acremonium chrysogenum (Acremonium); Amycolatopsis lactamdurans (Pseudonocardiaaceae); Emericellopsis minima (Emericellopsis); Streptomyces clavuligerus (Streptomycetaceae) | Antibacterial                        |
| S23906-1               | Phase I           | ND    | Sarcomelicope (Rutaceae)                                                                                                                                                     | Oncological disease                  |
| S-3304                 | Phase II          | S*/NM | Homo sapiens (Hominidae)                                                                                                                                                     | Solid tumours                        |
| Sabarubicin            | Phase II          | ND    | Streptomyces peucetius (Streptomycetaceae)                                                                                                                                   | Oncological disease                  |
| Sagopilone             | Phase II          | ND    | Sorangium cellulosum (Polyangiaceae)                                                                                                                                         | Oncological disease                  |
| SCH 503034             | Phase II          | S*/NM | Hepatitis C virus (Flaviviridae)                                                                                                                                             | Hepatitis C                          |
| SCH 530348             | Phase III         | ND    | Galbulimima (Himantandraceae)                                                                                                                                                | Cardiovascular and metabolic disease |
| SCH 6                  | Phase I           | S*/NM | Hepatitis C virus (Flaviviridae)                                                                                                                                             | Hepatitis C                          |
| Scillaren A            | In Clinical Trial | N     | Charybdis maritima (Asparagaceae)                                                                                                                                            | Cancer                               |
| Seliciclib             | Phase II          | ND    | Zea mays (Poaceae); Cocos nucifera (Arecaceae); Spinacia oleracea (Amaranthaceae); Pisum sativum (Fabaceae)                                                                  | Oncological disease                  |
| Sergliflozin etabonate | In Clinical Trial | ND    | Malus x domestica (Rosaceae)                                                                                                                                                 | Neurological disease                 |
| SGN-35                 | Phase I           | ND    | Dolabella auricularia (Aplysiidae); Symploca sp. VP642a (Symploca); Symploca sp. VP642b (Symploca); Symploca sp. VP642c (Symploca)                                           | Oncological disease                  |

|                             |                   |       |                                                                                                                                                                                                                            |                                                 |
|-----------------------------|-------------------|-------|----------------------------------------------------------------------------------------------------------------------------------------------------------------------------------------------------------------------------|-------------------------------------------------|
| Silatecan                   | Phase I           | ND    | Camptotheca acuminata (Cornaceae); Mappia foetida (Icacinaceae); Ophiorrhiza pumila (Rubiaceae)                                                                                                                            | Oncological disease                             |
| Simotaxel                   | In Clinical Trial | ND    | Taxus wallichiana (Taxaceae); Taxus brevifolia (Taxaceae)                                                                                                                                                                  | Oncological disease                             |
| SN2310                      | Phase I           | ND    | Camptotheca acuminata (Cornaceae); Mappia foetida (Icacinaceae); Ophiorrhiza pumila (Rubiaceae)                                                                                                                            | Oncological disease                             |
| Soblidotin                  | Phase II          | ND    | Dolabella auricularia (Aplysiidae); Symploca sp. VP642a (Symploca); Symploca sp. VP642b (Symploca); Symploca sp. VP642c (Symploca); Symploca hydroides (Symploca)                                                          | Oncological disease                             |
| Spectinomycin hydrochloride | In Clinical Trial | N     | Streptomyces spectabilis (Streptomycetaceae)                                                                                                                                                                               | Antibacterial                                   |
| Spisulosine                 | In Clinical Trial | ND    | Mactromeris polynyma (Mactridae)                                                                                                                                                                                           | Oncological disease                             |
| SPP100                      | Phase III         | S*/NM | Homo sapiens (Hominidae)                                                                                                                                                                                                   | Hypertension                                    |
| Squalamine                  | Phase III         | ND    | Squalus acanthias (Squalidae)                                                                                                                                                                                              | Oncological disease                             |
| SU-14813                    | Phase II          | ND    | Zea mays (Poaceae); Cocos nucifera (Arecaceae); Spinacia oleracea (Amaranthaceae); Pisum sativum (Fabaceae)                                                                                                                | Anticancer                                      |
| SU-6668                     | Phase II          | ND    | Zea mays (Poaceae); Cocos nucifera (Arecaceae); Spinacia oleracea (Amaranthaceae); Pisum sativum (Fabaceae)                                                                                                                | Anticancer                                      |
| Sulopenem                   | Phase I           | N     | Streptomyces cattleya (Streptomycetaceae)                                                                                                                                                                                  | Antibacterial                                   |
| TAFA-93                     | Phase I           | ND    | Streptomyces hygrosopicus (Streptomycetaceae)                                                                                                                                                                              | Immunological, inflammatory and related disease |
| Tafluposide                 | Phase I           | ND    | Dysosma pleiantha (Berberidaceae); Podophyllum peltatum (Berberidaceae); Sinopodophyllum hexandrum (Berberidaceae)                                                                                                         | Oncological disease                             |
| Tanespimycin                | Phase III         | ND    | Streptomyces hygrosopicus subsp. geldanus (Streptomycetaceae)                                                                                                                                                              | Oncological disease                             |
| Tanomastat                  | In Clinical Trial | S/NM  | Homo sapiens (Hominidae)                                                                                                                                                                                                   | Anticancer                                      |
| Taribavirin                 | Phase II          | ND    | Streptomyces candidus (Streptomycetaceae); Streptomyces showdoensis (Streptomycetaceae)                                                                                                                                    | Antiviral                                       |
| Tasidotin                   | Phase II          | ND    | Dolabella auricularia (Aplysiidae); Symploca sp. VP642a (Symploca); Symploca sp. VP642b (Symploca); Symploca sp. VP642c (Symploca)                                                                                         | Oncological disease                             |
| TD-1792                     | Phase II          | ND    | Acremonium chrysogenum (Acremonium); Amycolatopsis lactamdurans (Pseudonocardiaceae); Amycolatopsis orientalis (Pseudonocardiaceae); Emericellopsis minima (Emericellopsis); Streptomyces clavuligerus (Streptomycetaceae) | Antibacterial                                   |
| Tebipenem pivoxil           | Phase III         | ND    | Streptomyces cattleya (Streptomycetaceae)                                                                                                                                                                                  | Antibacterial                                   |
| Tecogalan                   | Phase II          | N     | Arthrobacter sp. (Micrococcaceae)                                                                                                                                                                                          | Oncological disease                             |
| Teduglutide                 | Phase III         | ND    | Homo sapiens (Hominidae)                                                                                                                                                                                                   | Short Bowel Syndrome                            |
| Telavancin                  | Phase III         | ND    | Amycolatopsis orientalis (Pseudonocardiaceae)                                                                                                                                                                              | Antibacterial                                   |

|                           |                   |      |                                                                                                                                                                                                                                                                                                                                                        |                                                 |
|---------------------------|-------------------|------|--------------------------------------------------------------------------------------------------------------------------------------------------------------------------------------------------------------------------------------------------------------------------------------------------------------------------------------------------------|-------------------------------------------------|
| Terameprocol              | Phase II          | ND   | Larrea tridentata (Zygophyllaceae)                                                                                                                                                                                                                                                                                                                     | Oncological disease                             |
| Tesetaxel                 | Phase II          | ND   | Taxus wallichiana (Taxaceae); Taxus brevifolia (Taxaceae)                                                                                                                                                                                                                                                                                              | Oncological disease                             |
| Tetrodin                  | Phase I           | N    | Atelopus (Bufonidae); Atelopus peruensis (Bufonidae); Colostethus inguinalis (Dendrobatidae); Haplochlaua maculosa (Octopodidae); Takifugu chrysops (Tetraodontidae); Takifugu niphobles (Tetraodontidae); Takifugu oblongus (Tetraodontidae); Takifugu pardalis (Tetraodontidae); Taricha torosa (Salamandridae); Vibrio alginolyticus (Vibrionaceae) | Neurological disease                            |
| Tetrodotoxin              | Phase III         | N    | Atelopus (Bufonidae); Atelopus peruensis (Bufonidae); Colostethus inguinalis (Dendrobatidae); Haplochlaua maculosa (Octopodidae); Takifugu chrysops (Tetraodontidae); Takifugu niphobles (Tetraodontidae); Takifugu oblongus (Tetraodontidae); Takifugu pardalis (Tetraodontidae); Taricha torosa (Salamandridae); Vibrio alginolyticus (Vibrionaceae) | Neurological disease                            |
| Tiacumicin B              | Phase III         | ND   | Dactylosporangium aurantiacum (Micromonosporaceae)                                                                                                                                                                                                                                                                                                     | Antibacterial                                   |
| Tipifarnib                | In Clinical Trial | S/NM | Homo sapiens (Hominidae)                                                                                                                                                                                                                                                                                                                               | Anticancer                                      |
| TL-310                    | In Clinical Trial | ND   | Taxus wallichiana (Taxaceae); Taxus brevifolia (Taxaceae)                                                                                                                                                                                                                                                                                              | Oncological disease                             |
| TMC-114                   | Phase III         | S/NM | Human immunodeficiency virus 1 (Retroviridae)                                                                                                                                                                                                                                                                                                          | Antiviral                                       |
| TNP-470                   | Phase III         | ND   | Aspergillus fumigatus (Trichocomaceae)                                                                                                                                                                                                                                                                                                                 | Oncological disease                             |
| Tomopenem                 | Phase II          | ND   | Streptomyces cattleya (Streptomycetaceae)                                                                                                                                                                                                                                                                                                              | Antibacterial                                   |
| TPI-287                   | Phase II          | ND   | Taxus wallichiana (Taxaceae); Taxus brevifolia (Taxaceae)                                                                                                                                                                                                                                                                                              | Oncological disease                             |
| Trastuzumab-DM1           | Phase II          | ND   | Anomodon attenuatus (Anomodontaceae); Claopodium crispifolium (Leskeaceae)                                                                                                                                                                                                                                                                             | Oncological disease                             |
| Triphendiol               | Phase I           | ND   | Glycine max (Fabaceae)                                                                                                                                                                                                                                                                                                                                 | Oncological disease                             |
| Trodusquemine             | Phase I           | N    | Squalus acanthias (Squalidae)                                                                                                                                                                                                                                                                                                                          | Cardiovascular and metabolic disease            |
| TS-033                    | Phase II          | ND   | Malus x domestica (Rosaceae)                                                                                                                                                                                                                                                                                                                           | Neurological disease                            |
| Vandetanib                | Phase III         | ND   | Zea mays (Poaceae); Cocos nucifera (Arecaceae); Spinacia oleracea (Amaranthaceae); Pisum sativum (Fabaceae)                                                                                                                                                                                                                                            | Anticancer                                      |
| Vatalanib                 | Phase III         | ND   | Zea mays (Poaceae); Cocos nucifera (Arecaceae); Spinacia oleracea (Amaranthaceae); Pisum sativum (Fabaceae)                                                                                                                                                                                                                                            | Anticancer                                      |
| Vicriviroc                | In Clinical Trial | S/NM | Homo sapiens (Hominidae)                                                                                                                                                                                                                                                                                                                               | Antiviral                                       |
| Vincristine/Bryostatins 1 | Phase I           | N    | Bugula neritina (Bugulidae); Catharanthus roseus (Apocynaceae)                                                                                                                                                                                                                                                                                         | Oncological disease                             |
| Vinflunine                | Phase III         | ND   | Catharanthus roseus (Apocynaceae)                                                                                                                                                                                                                                                                                                                      | Oncological disease                             |
| Voclosporin               | Phase III         | ND   | Claviceps purpurea (Clavicipitaceae); Cyllindrocarpon lucidum (Nectriaceae); Tolypocladium inflatum (Clavicipitaceae)                                                                                                                                                                                                                                  | Immunological, inflammatory and related disease |
| Vorinostat                | Phase II          | ND   | Streptomyces hygroscopicus (Streptomycetaceae)                                                                                                                                                                                                                                                                                                         | Anticancer                                      |

|            |                         |       |                                      |                      |
|------------|-------------------------|-------|--------------------------------------|----------------------|
| VX-740     | Phase II                | S*/NM | Homo sapiens (Hominidae)             | Rheumatoid arthritis |
| VX-950     | Phase II                | S*/NM | Hepatitis C virus (Flaviviridae)     | Hepatitis C          |
| WAP-8294A2 | In<br>Clinical<br>Trial | N     | Lysobacter sp. (Xanthomonadaceae)    | Antibacterial        |
| WX-UK1     | Phase I                 | S*/NM | Homo sapiens (Hominidae)             | Cancer               |
| Xen-2174   | Phase II                | N     | Conus marmoreus (Conidae)            | Neurological disease |
| XR-9051    | Phase I                 | ND    | Streptomyces sp. (Streptomycetaceae) | Oncological disease  |
| YM-543     | Phase II                | ND    | Malus x domestica (Rosaceae)         | Neurological disease |
| ZD6126     | In<br>Clinical<br>Trial | ND    | Colchicum autumnale (Colchicaceae)   | Oncological disease  |
| Ziconotide | Phase III               | N     | Conus (Conidae)                      | Chronic pain         |
| ZP10       | Phase III               | ND    | Homo sapiens (Hominidae)             | Anti-diabetes        |

**SI Appendix Table S7** List of nature-derived preclinical drugs and their species origins.

| <b>Drug name</b>                | <b>Relationship to natural product</b>                                   | <b>Species origin (family)</b>                                                                                                                                                                        | <b>Therapeutic class or targeted disease</b> |
|---------------------------------|--------------------------------------------------------------------------|-------------------------------------------------------------------------------------------------------------------------------------------------------------------------------------------------------|----------------------------------------------|
| A54556 A/B                      | Depsipeptide                                                             | <i>Streptomyces hawaiiensis</i> (Streptomycetaceae)                                                                                                                                                   | Antibacterial                                |
| AB-5                            | Semi-synthetic derivative of Diazonamide                                 | Phlebobranchia (Phlebobranchia)                                                                                                                                                                       | Anticancer                                   |
| Abyssomicin                     | Natural product                                                          | Verrucosipora (Micromonosporaceae)                                                                                                                                                                    | Antibacterial                                |
| AC98-6446                       | Semi-synthetic derivative of Mannoheptimycin                             | <i>Streptomyces hygroscopicus</i> (Streptomycetaceae)                                                                                                                                                 | Antibacterial                                |
| ACV1                            | Natural product                                                          | <i>Conus victoriae</i> (Conidae)                                                                                                                                                                      | Pain                                         |
| ADEP 2                          | Semi-synthetic derivative of acyldepsipeptidolactones                    | <i>Streptomyces hawaiiensis</i> (Streptomycetaceae)                                                                                                                                                   | Antibacterial                                |
| Alpha-Conotoxin Vc1.1           | Natural product                                                          | <i>Conus victoriae</i> (Conidae)                                                                                                                                                                      | Neuropathic Pain                             |
| Alpha-TOS                       | Natural product                                                          | <i>Homo sapiens</i> (Hominidae)                                                                                                                                                                       | Cancer                                       |
| AMM336                          | Natural product                                                          | <i>Conus catus</i> (Conidae)                                                                                                                                                                          | Pain                                         |
| Anti-hepcidin antibody          | Antibody                                                                 | <i>Homo sapiens</i> (Hominidae)                                                                                                                                                                       | Anti-inflammatory                            |
| Aplyronine A                    | A potent antitumor substance isolated from the sea hare, natural product | <i>Aplysia kurodai</i> (Aplysiidae)                                                                                                                                                                   | Oncological disease                          |
| Artelinic acid                  | Semi-synthetic derivative of artemisinin                                 | <i>Artemisia annua</i> (Asteraceae)                                                                                                                                                                   | Antimalarial                                 |
| Arylomycin                      | Natural product                                                          | <i>Streptomyces</i> (Streptomycetaceae)                                                                                                                                                               | Antibacterial                                |
| Ascididemine                    | An aromatic alkaloid, natural product                                    | <i>Didemnum</i> sp. (Didemnidae); <i>Cystodytes dellechiaiei</i> (Polycitoridae)                                                                                                                      | Oncological disease                          |
| Ascididemnin                    | A marine alkaloid                                                        | <i>Cystodytes dellechiaiei</i> (Polycitoridae)                                                                                                                                                        | Oncological disease                          |
| Asperlicin                      | Natural product                                                          | <i>Aspergillus alliaceus</i> (Trichocomaceae)                                                                                                                                                         | Anticancer                                   |
| Avarol                          | Natural product                                                          | <i>Dysidea avara</i> (Dysideidae)                                                                                                                                                                     | Anti-HIV                                     |
| Beta-4-amino etoposide analog   | Semi-synthetic derivative of podophyllotoxin                             | <i>Podophyllum peltatum</i> (Berberidaceae)                                                                                                                                                           | Anticancer                                   |
| Betulinic acid                  | Natural product                                                          | <i>Betula pubescens</i> (Betulaceae)                                                                                                                                                                  | Cancer                                       |
| BMS-185660                      | Semi-synthetic derivative of Taxol                                       | <i>Seimatoantlerium tepuiense</i> (Amphisphaeriaceae); <i>Corylus avellana</i> (Betulaceae); <i>Taxus wallichiana</i> (Taxaceae); <i>Taxus brevifolia</i> (Taxaceae); <i>Taxus baccata</i> (Taxaceae) | Anticancer                                   |
| BMS-249524                      | Natural product                                                          | <i>Nocardia</i> (Nocardiaceae)                                                                                                                                                                        | Antibacterial                                |
| BMS-411886                      | Semi-synthetic derivative of nocathiacin I                               | <i>Nocardia</i> (Nocardiaceae)                                                                                                                                                                        | Antibacterial                                |
| BMS-461996                      | Semi-synthetic derivative of nocathiacin I                               | <i>Nocardia</i> (Nocardiaceae)                                                                                                                                                                        | Antibacterial                                |
| Calanolide B                    | A natural product                                                        | <i>Calophyllum</i> (Calophyllaceae)                                                                                                                                                                   | Antiviral                                    |
| Calcitonin gene-related peptide | Peptide                                                                  | <i>Homo sapiens</i> (Hominidae)                                                                                                                                                                       | Anti-mirraime                                |
| Cethromycin                     | Semi-synthetic derivative of Erythromycin A                              | <i>Saccharopolyspora erythraea</i> (Pseudonocardiaceae)                                                                                                                                               | Antibacterial                                |

|                      |                                                 |                                                                                                                                                                                                       |                      |
|----------------------|-------------------------------------------------|-------------------------------------------------------------------------------------------------------------------------------------------------------------------------------------------------------|----------------------|
| CGX-1007             | Natural product                                 | <i>Conus geographus</i> (Conidae)                                                                                                                                                                     | Epilepsy             |
| CGX-1063             | A modified toxin                                | <i>Conus geographus</i> (Conidae)                                                                                                                                                                     | Neurological disease |
| CGX-1160             | Natural product                                 | <i>Conus geographus</i> (Conidae)                                                                                                                                                                     | Pain                 |
| CHAP31               | Peptidomimetic of trapoxin peptide              | <i>Helicoma ambiens</i> (Tubeufiaceae)                                                                                                                                                                | Anticancer           |
| Chi-conopeptides     | Natural product                                 | <i>Conus marmoreus</i> (Conidae)                                                                                                                                                                      | Neuropathic Pain     |
| Chi-conotoxin        | A molecule isolated from <i>Conus</i> sp.       | <i>Conus marmoreus</i> (Conidae)                                                                                                                                                                      | Neurological disease |
| Clindamycin          | Semi-synthetic derivative of lincomycin         | <i>Streptomyces lincolnensis</i> (Streptomycetaceae)                                                                                                                                                  | Antibacterial        |
| Combretastatin A4    | Natural product                                 | <i>Combretum caffrum</i> (Combretaceae)                                                                                                                                                               | Anticancer           |
| Conantokin-G         | A neurotoxin from <i>Conus geographus</i>       | <i>Conus geographus</i> (Conidae)                                                                                                                                                                     | epilepsy             |
| Contignasterol       | Natural product                                 | <i>Petrosia</i> (Petrosiidae)                                                                                                                                                                         | anti-asthma          |
| Coversin             | Peptide                                         | <i>Ixodoidea</i> (Ixodoidea)                                                                                                                                                                          | Asthma               |
| Cryptophycin-249     | Semi-synthetic derivative of Taxol              | <i>Seimatoantlerium tepuiense</i> (Amphisphaeriaceae); <i>Corylus avellana</i> (Betulaceae); <i>Taxus wallichiana</i> (Taxaceae); <i>Taxus brevifolia</i> (Taxaceae); <i>Taxus baccata</i> (Taxaceae) | Oncological disease  |
| Cryptophycin-309     | Semi-synthetic derivative of Taxol              | <i>Seimatoantlerium tepuiense</i> (Amphisphaeriaceae); <i>Corylus avellana</i> (Betulaceae); <i>Taxus wallichiana</i> (Taxaceae); <i>Taxus brevifolia</i> (Taxaceae); <i>Taxus baccata</i> (Taxaceae) | Oncological disease  |
| Curacin A            | A thiazole lipid, natural product               | <i>Lyngbya majuscula</i> (Lyngbya)                                                                                                                                                                    | Oncological disease  |
| Cyanidin-3-Glucoside | Natural product                                 | <i>Allium cepa</i> (Amaryllidaceae); <i>Brassica oleracea</i> (Brassicaceae); <i>Vaccinium vitis-idaea</i> (Ericaceae); <i>Malus x domestica</i> (Rosaceae); <i>Prunus</i> (Rosaceae)                 | Anti-obesity         |
| Cyanovirin N         | Protein                                         | <i>Nostoc ellipsoforum</i> (Nostocaceae)                                                                                                                                                              | Antiviral            |
| Cyclostreptin        | Natural product                                 | <i>Streptomyces</i> (Streptomycetaceae)                                                                                                                                                               | Oncological disease  |
| Dalbavancin          | Peptidomimetic                                  | <i>Amycolatopsis orientalis</i> (Pseudonocardiaceae)                                                                                                                                                  | Antibacterial        |
| DCK                  | Semi-synthetic derivative of suksdorfin         | <i>Lomatium</i> (Apiaceae)                                                                                                                                                                            | Antiviral            |
| DCQA                 | Natural product                                 | <i>Xanthium strumarium</i> (Asteraceae); <i>Chrysanthemum</i> (Asteraceae); <i>Doellingeria scabra</i> (Asteraceae); <i>Dittrichia viscosa</i> (Asteraceae); <i>Pyrus</i> (Rosaceae)                  | Antiviral            |
| Diazonamide          | A cyclic peptide, natural product               | <i>Phlebobranchia</i> (Phlebobranchia)                                                                                                                                                                | Oncological disease  |
| Dictyodendrins       | A pyrrolocarbazole derivatives, natural product | <i>Dictyodendrillidae</i> (Dictyodendrillidae)                                                                                                                                                        | Oncological disease  |
| Dictyostatin-1       | Natural product                                 | <i>Spongia</i> (Spongiidae)                                                                                                                                                                           | Anticancer           |
| DMMC                 | Cyclic peptide                                  | <i>Lyngbya majuscula</i> (Lyngbya)                                                                                                                                                                    | Anticancer           |
| Dolastatin 15        | Natural product                                 | <i>Dolabella auricularia</i> (Aplysiidae)                                                                                                                                                             | Cancer               |
| ECO-0501             | Natural product                                 | <i>Amycolatopsis orientalis</i> (Pseudonocardiaceae)                                                                                                                                                  | Antibacterial        |
| Eleutherobin         | A diterpene glycoside, natural                  | <i>Eleutherobia</i> (Alcyoniidae); <i>Eleutherobia</i>                                                                                                                                                | Oncological disease  |

|                |                                                                            |                                                                                                                                                                    |                     |
|----------------|----------------------------------------------------------------------------|--------------------------------------------------------------------------------------------------------------------------------------------------------------------|---------------------|
|                | product                                                                    | (Alcyoniidae); Erythropodium caribaeorum (Anthothelidae)                                                                                                           |                     |
| EP-013420      | Semi-synthetic derivative of Erythromycin A                                | Saccharopolyspora erythraea (Pseudonocardiaceae)                                                                                                                   | Antibacterial       |
| ER-076349      | Semi-synthetic derivative of halichondrin B                                | Axinella (Axinellidae); Phakellia (Axinellidae); Lissodendoryx (Coelosphaeridae); Halichondria okadai (Halichondriidae)                                            | Oncological disease |
| ER-086527      | Semi-synthetic derivative of halichondrin B                                | Axinella (Axinellidae); Phakellia (Axinellidae); Lissodendoryx (Coelosphaeridae); Halichondria okadai (Halichondriidae)                                            | Oncological disease |
| ES-285         | Natural product                                                            | Mactromeris polynyma (Mactridae)                                                                                                                                   | Cancer              |
| FR182876       | Natural product                                                            | Streptomyces (Streptomycetaceae)                                                                                                                                   | Oncological disease |
| FR290581       | Semi-synthetic derivative of Zofimarin                                     | Zopfiella marina (Chaetomiaceae); Zopfiella marina (Chaetomiaceae)                                                                                                 | Antifungal          |
| GE23077        | Cyclic peptide                                                             | Actinomadura (Thermomonosporaceae)                                                                                                                                 | Antibacterial       |
| GE81112        | Peptide                                                                    | Streptomyces (Streptomycetaceae)                                                                                                                                   | Antibacterial       |
| GM237354       | Semi-synthetic derivative of sordarin                                      | Sordaria araneosa (Sordariaceae)                                                                                                                                   | Antifungal          |
| GR-71251       | Peptidomimetic of substance P                                              | Homo sapiens (Hominidae)                                                                                                                                           | Antidepressant      |
| GS-8374        | Semi-synthetic derivative of pepstatin                                     | Actinomyces (Actinomycetaceae)                                                                                                                                     | Anti-HIV            |
| Halichondrin B | Natural product                                                            | Halichondria okadai (Halichondriidae)                                                                                                                              | Anticancer          |
| Halimide       | Natural product                                                            | Aspergillus (Trichocomaceae)                                                                                                                                       | Anticancer          |
| HMDCK          | Molecule modified from suksdorfin                                          | Lomatium (Apiaceae)                                                                                                                                                | Antiviral           |
| IC9564         | Semi-synthetic derivative of betulinic acid                                | Syzygium claviflorum (Myrtaceae)                                                                                                                                   | Antiviral           |
| IDN 5390       | Semi-synthetic derivative of Paclitaxel                                    | Seimatoantlerium tepuiense (Amphisphaeriaceae); Corylus avellana (Betulaceae); Taxus wallichiana (Taxaceae); Taxus brevifolia (Taxaceae); Taxus baccata (Taxaceae) | Oncological disease |
| IPL512602      | Semi-synthetic derivative of steroid contignasterol                        | Petrosia (Petrosiidae)                                                                                                                                             | Antiinflammatory    |
| Jatrophone 1   | Natural product                                                            | Euphorbia (Euphorbiaceae)                                                                                                                                          | Anticancer          |
| JE-2147        | Semi-synthetic derivative of pepstatin, Peptidomimetic of Phe-Pro sequence | Actinomyces (Actinomycetaceae)                                                                                                                                     | Anti-HIV            |
| KB141          | Mimetics of thyroid hormone                                                | Homo sapiens (Hominidae)                                                                                                                                           | Atherosclerosis     |
| KF58333        | Semi-synthetic derivative of radicicol                                     | Scedosporium (Microascaceae)                                                                                                                                       | Anticancer          |
| L-783,281      | Natural product                                                            | Pseudomassaria (Hyponectriaceae)                                                                                                                                   | Anti-diabetes       |
| L868276        | Semi-synthetic derivative of rohitukine                                    | Meliaceae (Meliaceae); Dysoxylum (Meliaceae)                                                                                                                       | Oncological disease |
| Lamellarin D   | A pyrrole alkaloid, natural product                                        | Lamellaria (Lamellariidae)                                                                                                                                         | Oncological disease |
| Laulimalide    | A macrocyclic lactone, a macrolide, natural product                        | Cacospongia (Thorectidae)                                                                                                                                          | Oncological disease |
| LY294002       | Semi-synthetic derivative of                                               | Cuscuta australis (Convolvulaceae);                                                                                                                                | Oncological disease |



|                          |                                                                                 |                                                                     |                      |
|--------------------------|---------------------------------------------------------------------------------|---------------------------------------------------------------------|----------------------|
|                          | quercetin                                                                       | Cuscuta chinensis (Convolvulaceae);<br>Camellia sinensis (Theaceae) |                      |
| LY-333328                | Peptidomimetic                                                                  | Amycolatopsis orientalis<br>(Pseudonocardiaceae)                    | Antibacterial        |
| MrlA/B                   | A neurotoxin from Conus<br>marmoreus                                            | Conus marmoreus (Conidae)                                           | neuropathic pain     |
| Muraymycin               | Natural product                                                                 | Streptomyces (Streptomycetaceae)                                    | Antibacterial        |
| NAI-107                  | Natural product                                                                 | Microbispora (Streptosporangiaceae)                                 | Antibacterial        |
| Neoamphimedine           | A pyridoacridine alkaloid from<br>Xestospongia sp.                              | Xestospongia (Petrosiidae)                                          | Oncological disease  |
| NPI-3114                 | Natural product                                                                 | Actinomyces (Actinomycetaceae)                                      | Antibiotic           |
| NPI-3304                 | Natural product                                                                 | Actinomyces (Actinomycetaceae)                                      | Antibiotic           |
| NVB302                   | Semi-synthetic derivative of<br>deoxyactagardine                                | Actinoplanes liguriensis<br>(Micromonosporaceae)                    | Antibacterial        |
| Peloruside A             | A macrocyclic lactone, natural<br>product                                       | Mycale (Mycalidae)                                                  | Oncological disease  |
| Pervilleine A            | Natural product                                                                 | Erythroxyllum (Erythroxyllaceae)                                    | Cancer               |
| Pirlimycin               | Semi-synthetic derivative of<br>lincomycin                                      | Streptomyces lincolnensis<br>(Streptomycetaceae)                    | Antibacterial        |
| Platensimycin            | Natural product                                                                 | Streptomyces platensis<br>(Streptomycetaceae)                       | Antibacterial        |
| PM01218                  | Natural product                                                                 | Hymedesmiidae (Hymedesmiidae)                                       | Anticancer           |
| Protoapigenone<br>analog | Semi-synthetic derivative of<br>Protoapigenone                                  | Thelypteris torresiana (Thelypteridaceae)                           | Anticancer           |
| R-135853                 | Semi-synthetic derivative of<br>Zofimarin                                       | Zopfella marina (Chaetomiaceae);<br>Zopfella marina (Chaetomiaceae) | Antifungal           |
| Rho-Conotoxin TIA        | A reversible noncompetitive<br>inhibitor of $\alpha$ -1 adrenergic<br>receptors | Conus tulipa (Conidae)                                              | Neurological disease |
| Robotnikinin             | Semi-synthetic derivative of<br>macrolactones                                   | Nocardiosis (Nocardiopsaceae)                                       | Anticancer           |
| RPR103611                | Semi-synthetic derivative of<br>Betulinic acid                                  | Syzygium claviflorum (Myrtaceae)                                    | Antiviral            |
| RU-64004                 | Semi-synthetic derivative of<br>Erythromycin A                                  | Saccharopolyspora erythraea<br>(Pseudonocardiaceae)                 | Antibacterial        |
| Sagopilone               | Semi-synthetic derivative of<br>epothilone B                                    | Sorangium cellulosum (Polyangiaceae)                                | Anticancer           |
| Salicylhalimide A        | A salicylate macrolide and a<br>polyketide, natural product                     | Haliclona sp. (Chalinidae)                                          | Oncological disease  |
| Salicylhalimide B        | A salicylate macrolide and a<br>polyketide, natural product                     | Haliclona sp. (Chalinidae)                                          | Oncological disease  |
| Salinosporamide A        | Natural product                                                                 | Salinispora (Micromonosporaceae)                                    | Cancer               |
| Sarcodictyin A           | A diterpene, natural product                                                    | Clavulariidae (Clavulariidae)                                       | Oncological disease  |
| Sarcodictyin B           | A diterpene, natural product                                                    | Clavulariidae (Clavulariidae)                                       | Oncological disease  |
| SCH-725424               | Natural product                                                                 | Kitasatospora (Streptomycetaceae)                                   | Antibacterial        |
| Silvestrol               | A natural product                                                               | Aglaia silvestris (Meliaceae)                                       | Oncological disease  |
| SNX-325                  | Natural product                                                                 | Segestria florentina (Segestriidae)                                 | Pain                 |
| TAN-1057A/B              | Natural product                                                                 | Flexibacter (Cytophagaceae)                                         | Antibacterial        |
| Telavancin               | Peptidomimetic                                                                  | Amycolatopsis orientalis<br>(Pseudonocardiaceae)                    | Antibacterial        |

|               |                                          |                                                   |                      |
|---------------|------------------------------------------|---------------------------------------------------|----------------------|
| Thiocoraline  | A depsipeptide, natural product          | Micromonospora marina (Micromonosporaceae)        | Oncological disease  |
| TI-356        | Semi-synthetic derivative of RA-VII      | Rubia (Rubiaceae); Rubia cordifolia (Rubiaceae)   | Oncological disease  |
| TM-701        | Peptide                                  | Leiurus quinquestriatus (Buthidae)                | Anticancer           |
| TMC-95-A      | Cyclic peptide                           | Apiospora montagnei (Apiosporaceae)               | Anticancer           |
| Variolin B    | A heterocyclic alkaloid, natural product | Hymedesmiidae (Hymedesmiidae)                     | Oncological disease  |
| VIC-105555    | Semi-synthetic derivative of lincomycin  | Streptomyces lincolnensis (Streptomycetaceae)     | Antibacterial        |
| VIC-5555      | Semi-synthetic derivative of lincomycin  | Streptomyces lincolnensis (Streptomycetaceae)     | Antibiotic           |
| Vitilevuamide | A cyclic peptide, natural product        | Didemnum (Didemnidae); Polysyncraton (Didemnidae) | Oncological disease  |
| XEP-018       | Peptide                                  | Conus (Conidae)                                   | Neurological disease |
| YM753         | Cyclic-peptide                           | Pseudomonas (Pseudomonadaceae)                    | Oncological disease  |

**SI Appendix Table S8** List of databases and literatures used in this work for finding the species origins of the approved, clinical trial and preclinical drugs, and those of natural products

| <b>Databases:</b> |                                                                                                                                                       |
|-------------------|-------------------------------------------------------------------------------------------------------------------------------------------------------|
| 1                 | Alternative Medicine Foundation, Inc: HerbMed Database (2010). ( <a href="http://www.herbmed.org/">http://www.herbmed.org/</a> )                      |
| 2                 | Erik gotfredsen. Liber Herbarum II Version 5.11 (2010) ( <a href="http://www.liberherbarum.com/">http://www.liberherbarum.com/</a> )                  |
| 3                 | Jim Duke. Phytochemical and Ethnobotanical Database (2008) ( <a href="http://www.ars-grin.gov/duke/">http://www.ars-grin.gov/duke/</a> )              |
| 4                 | MarinLit Database ( <a href="http://www.chem.canterbury.ac.nz/marinlit/marinlit.shtml">http://www.chem.canterbury.ac.nz/marinlit/marinlit.shtml</a> ) |
| 5                 | TCM-ID Database (2005) ( <a href="http://bidd.nus.edu.sg/group/tcm-id/tcmid.asp">http://bidd.nus.edu.sg/group/tcm-id/tcmid.asp</a> )                  |
| 6                 | TCM-ID Database (2009) ( <a href="http://bidd.nus.edu.sg/group/TCMsite/">http://bidd.nus.edu.sg/group/TCMsite/</a> )                                  |
| 7                 | HIT Database (2011) ( <a href="http://lifecenter.sgst.cn/hit/">http://lifecenter.sgst.cn/hit/</a> )                                                   |
| 8                 | Traditional Chinese Medicine Database@Taiwan (2011) ( <a href="http://tcm.cmu.edu.tw/">http://tcm.cmu.edu.tw/</a> )                                   |
| <b>Books:</b>     |                                                                                                                                                       |
| 1                 | Allen, RC; Annual Reports in Medicinal Chemistry, Volume 19, P313-326. Academic Press: Orlando. (1984).                                               |
| 2                 | Allen, RC; Annual Reports in Medicinal Chemistry, Volume 20, P315-325. Academic Press: Orlando. (1985).                                               |
| 3                 | Allen, RC; Annual Reports in Medicinal Chemistry, Volume 21, P323-335. Academic Press: Orlando. (1986).                                               |
| 4                 | Allen, RC; Annual Reports in Medicinal Chemistry, Volume 22, P315-330. Academic Press: Orlando. (1987).                                               |
| 5                 | Ong, HH; Allen, RC; Annual Reports in Medicinal Chemistry, Volume 23, P325-348. Academic Press: San Diego. (1988).                                    |
| 6                 | Ong, HH; Allen, RC; Annual Reports in Medicinal Chemistry, Volume 24, P295-315. Academic Press: San Diego. (1989).                                    |
| 7                 | Ong, HH; Allen, RC; Annual Reports in Medicinal Chemistry, Volume 25, P309-322. Academic Press: San Diego. (1990).                                    |
| 8                 | Strupczewski, JD; Ellis, DB; Allen, RC; Annual Reports in Medicinal Chemistry, Volume 26, P297-313. Academic Press: San Diego. (1991).                |
| 9                 | Strupczewski, JD; Ellis, DB; Annual Reports in Medicinal Chemistry, Volume 27, P321-337. Academic Press: San Diego. (1992).                           |
| 10                | Strupczewski, JD; Ellis, DB; Annual Reports in Medicinal Chemistry, Volume 28, P325-341. Academic Press: San Diego. (1993).                           |
| 11                | Cheng, X-M; Annual Reports in Medicinal Chemistry, Volume 29, P331-354. Academic Press: San Diego. (1994).                                            |
| 12                | Cheng, X-M; Annual Reports in Medicinal Chemistry, Volume 30, P295-317. Academic Press: San Diego. (1995).                                            |
| 13                | Cheng, X-M; Annual Reports in Medicinal Chemistry, Volume 31, P337-355. Academic Press: San Diego. (1996).                                            |
| 14                | Galatsis, P; Annual Reports in Medicinal Chemistry, Volume 32, P305-326. Academic Press: San Diego. (1997).                                           |
| 15                | Galatsis, P; Annual Reports in Medicinal Chemistry, Volume 33, P327-353. Academic Press: San Diego. (1998).                                           |
| 16                | Gaudilliere, B; Annual Reports in Medicinal Chemistry, Volume 34, P317-338. Academic Press: San Diego. (1999).                                        |
| 17                | Gaudilliere, B; Berna, P; Annual Reports in Medicinal Chemistry, Volume 35, P331-355. Academic Press: San Diego. (2000).                              |

- 18 Gaudilliere, B; Bernardelli, P; Berna, P; Annual Reports in Medicinal Chemistry, Volume 36, P293-318. Academic Press: San Diego. (2001).
- 19 Bernardelli, P; Gaudilliere, B; Vergne, F; Annual Reports in Medicinal Chemistry, Volume 37, P257-277. Academic Press: Amsterdam. (2002).
- 20 Boyer-Joubert, C; Lorthiois, E; Moreau, F; Annual Reports in Medicinal Chemistry, Volume 38, P347-374. Academic Press: Amsterdam. (2003).
- 21 Hegde, S; Carter, J; Annual Reports in Medicinal Chemistry, Volume 39, P337-368. Academic Press: Amsterdam. (2004).
- 22 Hegde, S; Schmidt, M; Annual Reports in Medicinal Chemistry, Volume 40, P443-473. Academic Press: Amsterdam. (2005).
- 23 Hegde, S; Schmidt, M; Annual Reports in Medicinal Chemistry, Volume 41, P432-493. Academic Press: Amsterdam. (2006).
- 24 Hegde, S; Schmidt, M; Annual Reports in Medicinal Chemistry, Volume 42, P441-502. Academic Press: Amsterdam. (2007).
- 25 Hegde, S; Schmidt, M; Annual Reports in Medicinal Chemistry, Volume 43, P542-610. Academic Press: Amsterdam. (2008).
- 26 Hegde, S; Schmidt, M; Annual Reports in Medicinal Chemistry, Volume 44, P575-630. Academic Press: Amsterdam. (2009).
- 27 Belinda Hawkins; Plants for life: Medicinal plant conservation and botanic gardens. ISBN: 1-905164-21-1. Botanic Gardens Conservation International. (2008).
- 28 Syntheses of Natural Products–91 Topics in Current Chemistry. Springer-Verlag. Berlin Heidelberg New York. (1980).
- 29 Vardanyan, RS; Hrubby, VJ; Synthesis of Essential Drugs. ELSEVIER: Amsterdam. (2006).
- 30 Koh, HL; Chua TK; Tan CH; A Guide To Medicinal Plants. World Scientific. (2009)

#### Journal Articles:

- 1 Abad MJ; Bedoya LM; Bermejo P; Natural marine anti-inflammatory products. Mini Rev Med Chem. 2008 Jul;8(8):740-54.
- 2 Abad MJ; Bermejo P; Sanchez Palomino S; Chiriboga X; Carrasco L; Antiviral activity of some South American medicinal plants. Phytother Res. 1999 Mar;13(2):142-6.
- 3 Abu-Irmaileh BE; Afifi FU; Herbal medicine in Jordan with special emphasis on commonly used herbs. J Ethnopharmacol. 2003 Dec;89(2-3):193-7.
- 4 Adams M; Alther W; Kessler M; Kluge M; Hamburger M; Malaria in the Renaissance: remedies from European herbals from the 16th and 17th century. J Ethnopharmacol. 2011 Jan 27;133(2):278-88.
- 5 Adams M; Berset C; Kessler M; Hamburger M; Medicinal herbs for the treatment of rheumatic disorders--a survey of European herbals from the 16th and 17th century. J Ethnopharmacol. 2009 Jan 30;121(3):343-59.
- 6 Adams M; Gmünder F; Hamburger M; Plants traditionally used in age related brain disorders--a survey of ethnobotanical literature. J Ethnopharmacol. 2007 Sep 25;113(3):363-81.
- 7 Adamu HM; Abayeh OJ; Agho MO; Abdullahi AL; Uba A; Dukku HU; Wufem BM; An ethnobotanical survey of Bauchi State herbal plants and their antimicrobial activity. J Ethnopharmacol. 2005 May 13;99(1):1-4.
- 8 Adebayo JO; Krettli AU; Potential antimalarials from Nigerian plants: a review. J Ethnopharmacol. 2011 Jan 27;133(2):289-302.
- 9 Aggarwal BB; Kunnumakkara AB; Harikumar KB; Tharakan ST; Sung B; Anand P; Potential of spice-derived phytochemicals for cancer prevention. Planta Med. 2008 Oct;74(13):1560-9.
- 10 Aguayo LG; Guzman L; Perez C; Aguayo LJ; Silva M; Becerra J; Fuentealba J; Historical and current perspectives of neuroactive compounds derived from Latin America. Mini Rev Med Chem. 2006 Sep;6(9):997-1008.

- 11 Agunu A; Yusuf S; Andrew GO; Zezi AU; Abdurahman EM; Evaluation of five medicinal plants used in diarrhoea treatment in Nigeria. *J Ethnopharmacol.* 2005 Oct 3;101(1-3):27-30.
- 12 Ahmad I; Beg AZ; Antimicrobial and phytochemical studies on 45 Indian medicinal plants against multi-drug resistant human pathogens. *J Ethnopharmacol.* 2001 Feb;74(2):113-23.
- 13 Alan L Harvey; Natural products for high-throughput screening. *Ethnomedicine and Drug Discovery.* 2002:39-44.
- 14 Ali H; König GM; Khalid SA; Wright AD; Kaminsky R; Evaluation of selected Sudanese medicinal plants for their in vitro activity against hemoflagellates, selected bacteria, HIV-1-RT and tyrosine kinase inhibitory, and for cytotoxicity. *J Ethnopharmacol.* 2002 Dec;83(3):219-28.
- 15 Ali NA; Jülich WD; Kusnick C; Lindequist U; Screening of Yemeni medicinal plants for antibacterial and cytotoxic activities. *J Ethnopharmacol.* 2001 Feb;74(2):173-9.
- 16 Alonso D; Khalil Z; Satkunathan N; Livett BG; Drugs from the sea: conotoxins as drug leads for neuropathic pain and other neurological conditions. *Mini Rev Med Chem.* 2003 Nov;3(7):785-7.
- 17 Alonso-Castro AJ; Villarreal ML; Salazar-Olivo LA; Gomez-Sanchez M; Dominguez F; Garcia-Carranca A; Mexican medicinal plants used for cancer treatment: pharmacological, phytochemical and ethnobotanical studies. *J Ethnopharmacol.* 2011 Feb 16;133(3):945-72.
- 18 Al-Qura'n S; Ethnopharmacological survey of wild medicinal plants in Showbak, Jordan. *J Ethnopharmacol.* 2009 May 4;123(1):45-50.
- 19 Altmann KH; Gertsch J; Anticancer drugs from nature--natural products as a unique source of new microtubule-stabilizing agents. *Nat Prod Rep.* 2007 Apr;24(2):327-57.
- 20 Altmann KH; Microtubule-stabilizing agents: a growing class of important anticancer drugs. *Curr Opin Chem Biol.* 2001 Aug;5(4):424-31.
- 21 Al-Waili NS; Treatment of diabetes mellitus by *Artemisia herba-alba* extract: preliminary study. *Clin Exp Pharmacol Physiol.* 1986 Jul;13(7):569-73.
- 22 Aly NY; Salmeen HN; Lila RA; Nagaraja PA; Pantoea agglomerans bloodstream infection in preterm neonates. *Med Princ Pract.* 2008;17(6):500-3.
- 23 Andrade-Cetto A; Becerra-Jiménez J; Cárdenas-Vázquez R; Alfa-glucosidase-inhibiting activity of some Mexican plants used in the treatment of type 2 diabetes. *J Ethnopharmacol.* 2008 Feb 28;116(1):27-32.
- 24 Andrade-Cetto A; Heinrich M; Mexican plants with hypoglycaemic effect used in the treatment of diabetes. *J Ethnopharmacol.* 2005 Jul 14;99(3):325-48.
- 25 Ankli A; Heinrich M; Bork P; Wolfram L; Bauerfeind P; Brun R; Schmid C; Weiss C; Bruggisser R; Gertsch J; Wasescha M; Sticher O; Yucatec Mayan medicinal plants: evaluation based on indigenous uses. *J Ethnopharmacol.* 2002 Jan;79(1):43-52.
- 26 Apers S; Baronikova S; Sindambiwe JB; Witvrouw M; De Clercq E; Vanden Berghe D; Van Marck E; Vlietinck A; Pieters L; Antiviral, haemolytic and molluscicidal activities of triterpenoid saponins from *Maesa lanceolata*: establishment of structure-activity relationships. *Planta Med.* 2001 Aug;67(6):528-32.
- 27 Aponte JC; Vaisberg AJ; Rojas R; Caviedes L; Lewis WH; Lamas G; Sarasara C; Gilman RH; Hammond GB; Isolation of cytotoxic metabolites from targeted peruvian amazonian medicinal plants. *J Nat Prod.* 2008 Jan;71(1):102-5.
- 28 Aravindaram K; Yang NS; Anti-inflammatory plant natural products for cancer therapy. *Planta Med.* 2010 Aug;76(11):1103-17.
- 29 Aretz W; Meiwes J; Seibert G; Vobis G; Wink J; Friulimicins: novel lipopeptide antibiotics with peptidoglycan synthesis inhibiting activity from *Actinoplanes friuliensis* sp. nov. I. Taxonomic studies of the producing microorganism and fermentation. *J Antibiot (Tokyo).* 2000 Aug;53(8):807-15.
- 30 Ashforth EJ; Fu C; Liu X; Dai H; Song F; Guo H; Zhang L; Bioprospecting for antituberculosis leads from microbial metabolites. *Nat Prod Rep.* 2010 Nov 21;27(11):1709-19.
- 31 Asres K; Seyoum A; Veeresham C; Bucar F; Gibbons S; Naturally derived anti-HIV agents. *Phytother Res.* 2005 Jul;19(7):557-81.
- 32 Avendaño C; Menéndez JC; Peptidomimetics in cancer chemotherapy. *Clin Transl Oncol.* 2007

Sep;9(9):563-70.

- 33 Bajguz A; Metabolism of brassinosteroids in plants. *Plant Physiol Biochem.* 2007 Feb;45(2):95-107.
- 34 Baker DD; Chu M; Oza U; Rajgarhia V; The value of natural products to future pharmaceutical discovery. *Nat Prod Rep.* 2007 Dec;24(6):1225-44.
- 35 Baltz RH; Miao V; Wrigley SK; Natural products to drugs: daptomycin and related lipopeptide antibiotics. *Nat Prod Rep.* 2005 Dec;22(6):717-41.
- 36 Balunas MJ; Kinghorn AD; Drug discovery from medicinal plants. *Life Sci.* 2005 Dec 22;78(5):431-41.
- 37 Balunas MJ; Kinghorn AD; Natural compounds with aromatase inhibitory activity: an update. *Planta Med.* 2010 Aug;76(11):1087-93.
- 38 Barthelemy S; Vergnes L; Moynier M; Guyot D; Labidalle S; Bahraoui E; Curcumin and curcumin derivatives inhibit Tat-mediated transactivation of type 1 human immunodeficiency virus long terminal repeat. *Res Virol.* 1998 Jan-Feb;149(1):43-52.
- 39 Baurin N; Arnoult E; Scior T; Do QT; Bernard P; Preliminary screening of some tropical plants for anti-tyrosinase activity. *J Ethnopharmacol.* 2002 Oct;82(2-3):155-8.
- 40 Beck HC; Hansen AM; Lauritsen FR; Novel pyrazine metabolites found in polymyxin biosynthesis by *Paenibacillus polymyxa*. *FEMS Microbiol Lett.* 2003 Mar 14;220(1):67-73.
- 41 Beghyn T; Deprez-Poulain R; Willand N; Folleas B; Deprez B; Natural compounds: leads or ideas? Bioinspired molecules for drug discovery. *Chem Biol Drug Des.* 2008 Jul;72(1):3-15.
- 42 Bennet L; Danell S; Berglund J; Clinical outcome of erythema migrans after treatment with phenoxymethyl penicillin. *Scand J Infect Dis.* 2003;35(2):129-31.
- 43 Bentley KW; beta-Phenylethylamines and the isoquinoline alkaloids. *Nat Prod Rep.* 1997 Aug;14(4):387-411.
- 44 Bentley KW; beta-Phenylethylamines and the isoquinoline alkaloids. *Nat Prod Rep.* 2006 Jun;23(3):444-63.
- 45 Bizimana N; Tietjen U; Zessin KH; Diallo D; Djibril C; Melzig MF; Clausen PH; Evaluation of medicinal plants from Mali for their in vitro and in vivo trypanocidal activity. *J Ethnopharmacol.* 2006 Feb 20;103(3):350-6.
- 46 Blunt JW; Copp BR; Hu WP; Munro MH; Northcote PT; Prinsep MR; Marine natural products. *Nat Prod Rep.* 2007 Feb;24(1):31-86.
- 47 Blunt JW; Copp BR; Hu WP; Munro MH; Northcote PT; Prinsep MR; Marine natural products. *Nat Prod Rep.* 2008 Feb;25(1):35-94.
- 48 Blunt JW; Copp BR; Hu WP; Munro MH; Northcote PT; Prinsep MR; Marine natural products. *Nat Prod Rep.* 2009 Feb;26(2):170-244.
- 49 Blunt JW; Copp BR; Munro MH; Northcote PT; Prinsep MR; Marine natural products. *Nat Prod Rep.* 2003 Feb;20(1):1-48.
- 50 Blunt JW; Copp BR; Munro MH; Northcote PT; Prinsep MR; Marine natural products. *Nat Prod Rep.* 2004 Feb;21(1):1-49.
- 51 Blunt JW; Copp BR; Munro MH; Northcote PT; Prinsep MR; Marine natural products. *Nat Prod Rep.* 2005 Feb;22(1):15-61.
- 52 Blunt JW; Copp BR; Munro MH; Northcote PT; Prinsep MR; Marine natural products. *Nat Prod Rep.* 2006 Feb;23(1):26-78.
- 53 Blunt JW; Copp BR; Munro MH; Northcote PT; Prinsep MR; Marine natural products. *Nat Prod Rep.* 2010 Feb;27(2):165-237.
- 54 Blunt JW; Copp BR; Munro MH; Northcote PT; Prinsep MR; Marine natural products. *Nat Prod Rep.* 2011 Feb 25;28(2):196-268.
- 55 Bode HB; Entomopathogenic bacteria as a source of secondary metabolites. *Curr Opin Chem Biol.* 2009 Apr;13(2):224-30.
- 56 Bonomi P; Paclitaxel poliglumex (PPX, CT-2103): macromolecular medicine for advanced non-small-cell lung cancer. *Expert Rev Anticancer Ther.* 2007 Apr;7(4):415-22.

- 57 Bottini R; Cassán F; Piccoli P; Gibberellin production by bacteria and its involvement in plant growth promotion and yield increase. *Appl Microbiol Biotechnol.* 2004 Oct;65(5):497-503.
- 58 Bourdy G; DeWalt SJ; Chávez de Michel LR; Roca A; Deharo E; Muñoz V; Balderrama L; Quenevo C; Gimenez A; Medicinal plants uses of the Tacana, an Amazonian Bolivian ethnic group. *J Ethnopharmacol.* 2000 May;70(2):87-109.
- 59 Brandão MG; Zanetti NN; Oliveira P; Graef CF; Santos AC; Monte-Mór RL; Brazilian medicinal plants described by 19th century European naturalists and in the Official Pharmacopoeia. *J Ethnopharmacol.* 2008 Nov 20;120(2):141-8.
- 60 Brower V; Back to nature: extinction of medicinal plants threatens drug discovery. *J Natl Cancer Inst.* 2008 Jun 18;100(12):838-9.
- 61 Buckheit RW Jr; White EL; Fliakas-Boltz V; Russell J; Stup TL; Kinjerski TL; Osterling MC; Weigand A; Bader JP; Unique anti-human immunodeficiency virus activities of the nonnucleoside reverse transcriptase inhibitors calanolide A, costatolide, and dihydrocostatolide. *Antimicrob Agents Chemother.* 1999 Aug;43(8):1827-34.
- 62 Butler MS; Buss AD; Natural products--the future scaffolds for novel antibiotics? *Biochem Pharmacol.* 2006 Mar 30;71(7):919-29.
- 63 Butler MS; Natural products to drugs: natural product derived compounds in clinical trials. *Nat Prod Rep.* 2005 Apr;22(2):162-95.
- 64 Butler MS; Natural products to drugs: natural product-derived compounds in clinical trials. *Nat Prod Rep.* 2008 Jun;25(3):475-516.
- 65 Butler MS; The role of natural product chemistry in drug discovery. *J Nat Prod.* 2004 Dec;67(12):2141-53.
- 66 Calixto JB; Beirith A; Ferreira J; Santos AR; Filho VC; Yunes RA; Naturally occurring antinociceptive substances from plants. *Phytother Res.* 2000 Sep;14(6):401-18.
- 67 Calixto JB; Campos MM; Otuki MF; Santos AR; Anti-inflammatory compounds of plant origin. Part II. modulation of pro-inflammatory cytokines, chemokines and adhesion molecules. *Planta Med.* 2004 Feb;70(2):93-103.
- 68 Camacho MR; Phillipson JD; Croft SL; Solis PN; Marshall SJ; Ghazanfar SA; Screening of plant extracts for antiprotozoal and cytotoxic activities. *J Ethnopharmacol.* 2003 Dec;89(2-3):185-91.
- 69 Canales M; Hernández T; Caballero J; Romo de Vivar A; Avila G; Duran A; Lira R; Informant consensus factor and antibacterial activity of the medicinal plants used by the people of San Rafael Coxcatlán, Puebla, México. *J Ethnopharmacol.* 2005 Mar 21;97(3):429-39.
- 70 Chan-Bacab MJ; Peña-Rodríguez LM; Plant natural products with leishmanicidal activity. *Nat Prod Rep.* 2001 Dec;18(6):674-88.
- 71 Chattopadhyay D; Naik TN; Antivirals of ethnomedicinal origin: structure-activity relationship and scope. *Mini Rev Med Chem.* 2007 Mar;7(3):275-301.
- 72 Chen BJ; Triptolide, a novel immunosuppressive and anti-inflammatory agent purified from a Chinese herb *Tripterygium wilfordii* Hook F. *Leuk Lymphoma.* 2001 Jul;42(3):253-65.
- 73 Chhetri DR; Parajuli P; Subba GC; Antidiabetic plants used by Sikkim and Darjeeling Himalayan tribes, India. *J Ethnopharmacol.* 2005 Jun 3;99(2):199-202.
- 74 Chilibeck PD; Cornish SM; Effect of estrogenic compounds (estrogen or phytoestrogens) combined with exercise on bone and muscle mass in older individuals. *Appl Physiol Nutr Metab.* 2008 Feb;33(1):200-12.
- 75 Chin YW; Balunas MJ; Chai HB; Kinghorn AD; Drug discovery from natural sources. *AAPS J.* 2006 Apr 14;8(2):E239-53.
- 76 Chua TK; Koh HL; Medicinal plants as potential sources of lead compounds with anti-platelet and anti-coagulant activities. *Mini Rev Med Chem.* 2006 Jun;6(6):611-24.
- 77 Cirla A; Mann J; Combretastatins: from natural products to drug discovery. *Nat Prod Rep.* 2003 Dec;20(6):558-64.
- 78 Cisowska A; Jankowski S; Doroszkiewicz W; Synergistic bactericidal effect of cephalixin and normal cord serum (NCS) against *Escherichia coli* K1 strains isolated from children with urinary tract infections (UTI). *Acta Microbiol Pol.* 1999;48(4):381-3.

- 79 Clardy J; Walsh C; Lessons from natural molecules. *Nature*. 2004 Dec 16;432(7019):829-37.
- 80 Copp BR; Antimycobacterial natural products. *Nat Prod Rep*. 2003 Dec;20(6):535-57.
- 81 Copp BR; Pearce AN; Natural product growth inhibitors of *Mycobacterium tuberculosis*. *Nat Prod Rep*. 2007 Apr;24(2):278-97.
- 82 Cordier C; Morton D; Murrison S; Nelson A; O'Leary-Steele C; Natural products as an inspiration in the diversity-oriented synthesis of bioactive compound libraries. *Nat Prod Rep*. 2008 Aug;25(4):719-37.
- 83 Corson TW; Crews CM; Molecular understanding and modern application of traditional medicines: triumphs and trials. *Cell*. 2007 Sep 7;130(5):769-74.
- 84 Cos P; Maes L; Vlietinck A; Pieters L; Plant-derived leading compounds for chemotherapy of human immunodeficiency virus (HIV) infection - an update (1998 - 2007). *Planta Med*. 2008 Sep;74(11):1323-37.
- 85 Costa-Lotufo LV; Khan MT; Ather A; Wilke DV; Jimenez PC; Pessoa C; de Moraes ME; de Moraes MO; Studies of the anticancer potential of plants used in Bangladeshi folk medicine. *J Ethnopharmacol*. 2005 May 13;99(1):21-30.
- 86 Cragg GM; Grothaus PG; Newman DJ; Impact of natural products on developing new anti-cancer agents. *Chem Rev*. 2009 Jul;109(7):3012-43.
- 87 Cragg GM; Newman DJ; Plants as a source of anti-cancer agents. *J Ethnopharmacol*. 2005 Aug 22;100(1-2):72-9.
- 88 Cragg GM; Newman DJ; Snader KM; Natural products in drug discovery and development. *J Nat Prod*. 1997 Jan;60(1):52-60.
- 89 Cunnane SC; Ganguli S; Menard C; Liede AC; Hamadeh MJ; Chen ZY; Wolever TM; Jenkins DJ; High alpha-linolenic acid flaxseed (*Linum usitatissimum*): some nutritional properties in humans. *Br J Nutr*. 1993 Mar;69(2):443-53.
- 90 da Rocha AB; Lopes RM; Schwartsmann G; Natural products in anticancer therapy. *Curr Opin Pharmacol*. 2001 Aug;1(4):364-9.
- 91 Dalton R; Biodiversity: cashing in on the rich coast. *Nature*. 2006 Jun 1;441(7093):567-9.
- 92 Dancey J; Sausville EA; Issues and progress with protein kinase inhibitors for cancer treatment. *Nat Rev Drug Discov*. 2003 Apr;2(4):296-313.
- 93 Danishefsky S; On the potential of natural products in the discovery of pharma leads: a case for reassessment. *Nat Prod Rep*. 2010 Aug;27(8):1114-6.
- 94 David G. I. Kingston; Tubulin-Interactive Natural Products as Anticancer Agents. *AACR Annual Meeting*. 2008 Apr:305-13.
- 95 de Boer HJ; Kool A; Broberg A; Mziray WR; Hedberg I; Levenfors JJ; Anti-fungal and anti-bacterial activity of some herbal remedies from Tanzania. *J Ethnopharmacol*. 2005 Jan 15;96(3):461-9.
- 96 De Clercq E; Current lead natural products for the chemotherapy of human immunodeficiency virus (HIV) infection. *Med Res Rev*. 2000 Sep;20(5):323-49.
- 97 de la Fuente JA; Manzanaro S; Aldose reductase inhibitors from natural sources. *Nat Prod Rep*. 2003 Apr;20(2):243-51.
- 98 de Sá Alves FR; Barreiro EJ; Fraga CA; From nature to drug discovery: the indole scaffold as a 'privileged structure'. *Mini Rev Med Chem*. 2009 Jun;9(7):782-93.
- 99 Debono M; Barnhart M; Carrell CB; Hoffmann JA; Occolowitz JL; Abbott BJ; Fukuda DS; Hamill RL; Biemann K; Herlihy WC; A21978C, a complex of new acidic peptide antibiotics: isolation, chemistry, and mass spectral structure elucidation. *J Antibiot (Tokyo)*. 1987 Jun;40(6):761-77.
- 100 Demain AL; Prescription for an ailing pharmaceutical industry. *Nat Biotechnol*. 2002 Apr;20(4):331.
- 101 Dembitsky VM; Glorizova TA; Poroikov VV; Natural peroxy anticancer agents. *Mini Rev Med Chem*. 2007 Jun;7(6):571-89.
- 102 Desai AG; Qazi GN; Ganju RK; El-Tamer M; Singh J; Saxena AK; Bedi YS; Taneja SC; Bhat HK; Medicinal plants and cancer chemoprevention. *Curr Drug Metab*. 2008 Sep;9(7):581-91.
- 103 Deshpande L; Pfaller MA; Jones RN; In vitro activity of ceftiofur tested against clinical isolates of *Escherichia coli* and *Klebsiella pneumoniae* including extended spectrum beta-lactamase producing strains.



- 
- 104 Di Santo R; Natural products as antifungal agents against clinically relevant pathogens. *Nat Prod Rep.* 2010 Jul 24;27(7):1084-98.
- 
- 105 Dinan L; Phytoecdysteroids: biological aspects. *Phytochemistry.* 2001 Jun;57(3):325-39.
- 
- 106 Dinan L; Savchenko T; Whiting P; On the distribution of phytoecdysteroids in plants. *Cell Mol Life Sci.* 2001 Jul;58(8):1121-32.
- 
- 107 Dinkova-Kostova AT; Phytochemicals as protectors against ultraviolet radiation: versatility of effects and mechanisms. *Planta Med.* 2008 Oct;74(13):1548-59.
- 
- 108 do Céu de Madureira M; Paula Martins A; Gomes M; Paiva J; Proença da Cunha A; do Rosário V; Antimalarial activity of medicinal plants used in traditional medicine in S. Tomé and Príncipe islands. *J Ethnopharmacol.* 2002 Jun;81(1):23-9.
- 
- 109 Douwes E; Crouch NR; Edwards TJ; Mulholland DA; Regression analyses of southern African ethnomedicinal plants: informing the targeted selection of bioprospecting and pharmacological screening subjects. *J Ethnopharmacol.* 2008 Oct 28;119(3):356-64.
- 
- 110 Duarte CD; Barreiro EJ; Fraga CA; Privileged structures: a useful concept for the rational design of new lead drug candidates. *Mini Rev Med Chem.* 2007 Nov;7(11):1108-19.
- 
- 111 Duncan WC; Holder WR; Roberts DP; Knox JM; Treatment of gonorrhea with spectinomycin hydrochloride: comparison with standard penicillin schedules. *Antimicrob Agents Chemother.* 1972 Mar;1(3):210-4.
- 
- 112 Eddouks M; Maghrani M; Lemhadri A; Ouahidi ML; Jouad H; Ethnopharmacological survey of medicinal plants used for the treatment of diabetes mellitus, hypertension and cardiac diseases in the south-east region of Morocco (Tafilalet). *J Ethnopharmacol.* 2002 Oct;82(2-3):97-103.
- 
- 113 Efferth T; Personalized cancer medicine: from molecular diagnostics to targeted therapy with natural products. *Planta Med.* 2010 Aug;76(11):1143-54.
- 
- 114 El Beyrouthy M; Arnold N; Delelis-Dusollier A; Dupont F; Plants used as remedies antirheumatic and antineuralgic in the traditional medicine of Lebanon. *J Ethnopharmacol.* 2008 Dec 8;120(3):315-34.
- 
- 115 Eloff JN; Katerere DR; McGaw LJ; The biological activity and chemistry of the southern African Combretaceae. *J Ethnopharmacol.* 2008 Oct 28;119(3):686-99.
- 
- 116 Erenmemisoglu A; Saraymen R; Ustun S; Effect of a *Rosmarinus officinalis* leave extract on plasma glucose levels in normoglycaemic and diabetic mice. *Pharmazie.* 1997 Aug;52(8):645-6.
- 
- 117 Evans ME; Feola DJ; Rapp RP; Polymyxin B sulfate and colistin: old antibiotics for emerging multiresistant gram-negative bacteria. *Ann Pharmacother.* 1999 Sep;33(9):960-7.
- 
- 118 Fabre N; Claparols C; Richelme S; Angelin ML; Fourasté I; Moulis C; Direct characterization of isoquinoline alkaloids in a crude plant extract by ion-pair liquid chromatography-electrospray ionization tandem mass spectrometry: example of *Eschscholtzia californica*. *J Chromatogr A.* 2000 Dec 22;904(1):35-46.
- 
- 119 Farnsworth NR; Akerele O; Bingel AS; Soejarto DD; Guo Z; Medicinal plants in therapy. *Bull World Health Organ.* 1985;63(6):965-81.
- 
- 120 Faulkner DJ; Marine natural products. *Nat Prod Rep.* 1994 Aug;11(4):355-94.
- 
- 121 Faulkner DJ; Marine natural products. *Nat Prod Rep.* 1996 Apr;13(2):75-125.
- 
- 122 Faulkner DJ; Marine natural products. *Nat Prod Rep.* 1998 Apr;15(2):113-58.
- 
- 123 Faulkner DJ; Marine natural products. *Nat Prod Rep.* 2000 Feb;17(1):7-55.
- 
- 124 Faulkner DJ; Marine natural products. *Nat Prod Rep.* 2001 Feb;18(1):1-49.
- 
- 125 Faulkner DJ; Marine natural products. *Nat Prod Rep.* 2002 Feb;19(1):1-48.
- 
- 126 Fear G; Komarnytsky S; Raskin I; Protease inhibitors and their peptidomimetic derivatives as potential drugs. *Pharmacol Ther.* 2007 Feb;113(2):354-68.

- 127 Ferreira A; Proença C; Serralheiro ML; Araújo ME; The in vitro screening for acetylcholinesterase inhibition and antioxidant activity of medicinal plants from Portugal. *J Ethnopharmacol.* 2006 Nov 3;108(1):31-7.
- 128 Fiore C; Eisenhut M; Krausse R; Ragazzi E; Pellati D; Armanini D; Bielenberg J; Antiviral effects of Glycyrrhiza species. *Phytother Res.* 2008 Feb;22(2):141-8.
- 129 Force T; Kolaja KL; Cardiotoxicity of kinase inhibitors: the prediction and translation of preclinical models to clinical outcomes. *Nat Rev Drug Discov.* 2011 Feb;10(2):111-26.
- 130 Foster BC; Arnason JT; Briggs CJ; Natural health products and drug disposition. *Annu Rev Pharmacol Toxicol.* 2005;45:203-26.
- 131 Fouche G; Cragg GM; Pillay P; Kolesnikova N; Maharaj VJ; Senabe J; In vitro anticancer screening of South African plants. *J Ethnopharmacol.* 2008 Oct 28;119(3):455-61.
- 132 Francy-Guilford J; Pezzuto JM; Mechanisms of cancer chemopreventive agents: a perspective. *Planta Med.* 2008 Oct;74(13):1644-50.
- 133 Fritz P; Dippon J; Kierschke T; Siegle I; Möhring A; Moisa A; Mürdter TE; Impact of mistletoe lectin binding in breast cancer. *Anticancer Res.* 2004 Mar-Apr;24(2C):1187-92.
- 134 Fukutsu N; Sakamaki Y; Kawasaki T; Saito K; Nakazawa H; Verification of cefmetazole and cefpodoxime proxetil contamination to other pharmaceuticals by liquid chromatography-tandem mass spectrometry. *Chem Pharm Bull (Tokyo).* 2006 Oct;54(10):1469-72.
- 135 Fulda S; Modulation of apoptosis by natural products for cancer therapy. *Planta Med.* 2010 Aug;76(11):1075-9.
- 136 Gachet MS; Schühly W; Jacaranda--an ethnopharmacological and phytochemical review. *J Ethnopharmacol.* 2009 Jan 12;121(1):14-27.
- 137 Gani OA; Engh RA; Protein kinase inhibition of clinically important staurosporine analogues. *Nat Prod Rep.* 2010 Apr 24;27(4):489-98.
- 138 Gautam M; Diwanay S; Gairola S; Shinde Y; Patki P; Patwardhan B; Immunoadjuvant potential of *Asparagus racemosus* aqueous extract in experimental system. *J Ethnopharmacol.* 2004 Apr;91(2-3):251-5.
- 139 Gautam R; Saklani A; Jachak SM; Indian medicinal plants as a source of antimycobacterial agents. *J Ethnopharmacol.* 2007 Mar 21;110(2):200-34.
- 140 Ge H; Wang YF; Xu J; Gu Q; Liu HB; Xiao PG; Zhou J; Liu Y; Yang Z; Su H; Anti-influenza agents from Traditional Chinese Medicine. *Nat Prod Rep.* 2010 Jan 12;27(12):1758-80.
- 141 Gedif T; Hahn HJ; The use of medicinal plants in self-care in rural central Ethiopia. *J Ethnopharmacol.* 2003 Aug;87(2-3):155-61.
- 142 George P Tegos; Natural substrates and inhibitors of multidrug resistant pumps (MDRs) redefine the plant antimicrobials. *Lead Molecules from Natural Products.* 2006:45-59.
- 143 Gericke N; Viljoen AM; Sceletium--a review update. *J Ethnopharmacol.* 2008 Oct 28;119(3):653-63.
- 144 Geyid A; Abebe D; Debella A; Makonnen Z; Aberra F; Teka F; Kebede T; Urga K; Yersaw K; Biza T; Mariam BH; Guta M; Screening of some medicinal plants of Ethiopia for their anti-microbial properties and chemical profiles. *J Ethnopharmacol.* 2005 Mar 21;97(3):421-7.
- 145 Gibbons S; Anti-staphylococcal plant natural products. *Nat Prod Rep.* 2004 Apr;21(2):263-77.
- 146 Gibbons S; Phytochemicals for bacterial resistance--strengths, weaknesses and opportunities. *Planta Med.* 2008 May;74(6):594-602.
- 147 Giday M; Asfaw Z; Elmqvist T; Woldu Z; An ethnobotanical study of medicinal plants used by the Zay people in Ethiopia. *J Ethnopharmacol.* 2003 Mar;85(1):43-52.
- 148 Gill AL; Verdonk M; Boyle RG; Taylor R; A comparison of physicochemical property profiles of marketed oral drugs and orally bioavailable anti-cancer protein kinase inhibitors in clinical development. *Curr Top Med Chem.* 2007;7(14):1408-22.
- 149 Gochfeld DJ; El Sayed KA; Yousaf M; Hu JF; Bartyzel P; Dunbar DC; Wilkins SP; Zjawiony JK; Schinazi RF; Schlueter Wirtz S; Tharnish PM; Hamann MT; Marine natural products as lead anti-HIV agents. *Mini*

- 150 Gordaliza M; Natural products as leads to anticancer drugs. *Clin Transl Oncol*. 2007 Dec;9(12):767-76.
- 151 Gordon M Cragg; David J Newman; Drugs from nature" past achievements, future prospects. *Ethnomedicine and Drug Discovery*. 2002:23-37.
- 152 Gordon M. Cragg; David J. Newman; Biodiversity: A continuing source of novel drug leads. *Pure Appl. Chem*. 2005;77(1):7-24.
- 153 Graham JG; Quinn ML; Fabricant DS; Farnsworth NR; Plants used against cancer - an extension of the work of Jonathan Hartwell. *J Ethnopharmacol*. 2000 Dec;73(3):347-77.
- 154 Gravel E; Poupon E; Biosynthesis and biomimetic synthesis of alkaloids isolated from plants of the *Nitraria* and *Myrioneuron* genera: an unusual lysine-based metabolism. *Nat Prod Rep*. 2010 Jan;27(1):32-56.
- 155 Groppo FC; Bergamaschi C de C; Cogo K; Franz-Montan M; Motta RH; de Andrade ED; Use of phytotherapy in dentistry. *Phytother Res*. 2008 Aug;22(8):993-8.
- 156 Gu ZM; Zhou D; Lewis NJ; Wu J; Shi G; McLaughlin JL; Isolation of new bioactive annonaceous acetogenins from *Rollinia mucosa* guided by liquid chromatography/mass spectrometry. *Bioorg Med Chem*. 1997 Oct;5(10):1911-6.
- 157 Guarrera PM; Salerno G; Caneva G; Folk phytotherapeutical plants from Maratea area (Basilicata, Italy). *J Ethnopharmacol*. 2005 Jul 14;99(3):367-78.
- 158 Guilfoile PG; Hutchinson CR; A bacterial analog of the *mdr* gene of mammalian tumor cells is present in *Streptomyces peuceetius*, the producer of daunorubicin and doxorubicin. *Proc Natl Acad Sci U S A*. 1991 Oct 1;88(19):8553-7.
- 159 Gul W; Hamann MT; Indole alkaloid marine natural products: an established source of cancer drug leads with considerable promise for the control of parasitic, neurological and other diseases. *Life Sci*. 2005 Dec 22;78(5):442-53.
- 160 Gulder TA; Moore BS; Chasing the treasures of the sea - bacterial marine natural products. *Curr Opin Microbiol*. 2009 Jun;12(3):252-60.
- 161 Haefner B; Drugs from the deep: marine natural products as drug candidates. *Drug Discov Today*. 2003 Jun 15;8(12):536-44.
- 162 Hamill FA; Apio S; Mubiru NK; Bukenya-Ziraba R; Mosango M; Maganyi OW; Soejarto DD; Traditional herbal drugs of Southern Uganda, II: literature analysis and antimicrobial assays. *J Ethnopharmacol*. 2003 Jan;84(1):57-78.
- 163 Hara O; Hutchinson CR; A macrolide 3-O-acyltransferase gene from the midecamycin-producing species *Streptomyces mycarofaciens*. *J Bacteriol*. 1992 Aug;174(15):5141-4.
- 164 Harvey A; Strategies for discovering drugs from previously unexplored natural products. *Drug Discov Today*. 2000 Jul;5(7):294-300.
- 165 Harvey AL; Cree IA; High-throughput screening of natural products for cancer therapy. *Planta Med*. 2010 Aug;76(11):1080-6.
- 166 Hauser AT; Jung M; Targeting epigenetic mechanisms: potential of natural products in cancer chemoprevention. *Planta Med*. 2008 Oct;74(13):1593-601.
- 167 Hayashi Y; Matsuura N; Toshima H; Itoh N; Ishikawa J; Mikami Y; Dairi T; Cloning of the gene cluster responsible for the biosynthesis of brasiliardin A, a unique diterpenoid. *J Antibiot (Tokyo)*. 2008 Mar;61(3):164-74.
- 168 Hilgert NI; Plants used in home medicine in the Zenta River basin, Northwest Argentina. *J Ethnopharmacol*. 2001 Jun;76(1):11-34.
- 169 Hilou A; Nacoulma OG; Guiguemde TR; In vivo antimalarial activities of extracts from *Amaranthus spinosus* L. and *Boerhaavia erecta* L. in mice. *J Ethnopharmacol*. 2006 Jan 16;103(2):236-40.
- 170 HINUMA Y; Zaomyein, a new antibiotic from a *Streptomyces* sp. *J Antibiot (Tokyo)*. 1954 Aug;7(4):134-6.

- 171 Hovhannisyan A; Matz M; Gebhardt R; From teratogens to potential therapeutics: natural inhibitors of the Hedgehog signaling network come of age. *Planta Med.* 2009 Oct;75(13):1371-80.
- 172 Hsiao WL; Liu L; The role of traditional Chinese herbal medicines in cancer therapy--from TCM theory to mechanistic insights. *Planta Med.* 2010 Aug;76(11):1118-31.
- 173 Hsieh MT; Peng WH; Wu CR; Ng KY; Cheng CL; Xu HX; Review on experimental research of herbal medicines with anti-amnesic activity. *Planta Med.* 2010 Feb;76(3):203-17.
- 174 Huang HY; Hsieh SH; Sample stacking for the analysis of penicillins by microemulsion electrokinetic chromatography. *Electrophoresis.* 2008 Sep;29(18):3905-15.
- 175 Hübel K; Lessmann T; Waldmann H; Chemical biology--identification of small molecule modulators of cellular activity by natural product inspired synthesis. *Chem Soc Rev.* 2008 Jul;37(7):1361-74.
- 176 Hunfeld KP; Weigand J; Wichelhaus TA; Kekoukh E; Kraiczky P; Brade V; In vitro activity of mezlocillin, meropenem, aztreonam, vancomycin, teicoplanin, ribostamycin and fusidic acid against *Borrelia burgdorferi*. *Int J Antimicrob Agents.* 2001 Mar;17(3):203-8.
- 177 Ikonomidis A; Michail G; Vasdeki A; Labrou M; Karavasilis V; Stathopoulos C; Maniatis AN; Pournaras S; In vitro and in vivo evaluations of oxacillin efficiency against mecA-positive oxacillin-susceptible *Staphylococcus aureus*. *Antimicrob Agents Chemother.* 2008 Nov;52(11):3905-8.
- 178 Ilaria lampronti, et.al.; Plants with antitumor properties: from biologically active molecules to drugs. *Lead Molecules from Natural Products.* 2006:45-63.
- 179 Ingkaninan K; Temkitthawon P; Chuenchom K; Yuyaem T; Thongnoi W; Screening for acetylcholinesterase inhibitory activity in plants used in Thai traditional rejuvenating and neurotonic remedies. *J Ethnopharmacol.* 2003 Dec;89(2-3):261-4.
- 180 Itah AY; Udokpoh AE; Ofum MU; Bacteriological quality of some pharmaceutical products marketed by drug vendors in Uyo, Nigeria. *Afr J Health Sci.* 2004 Jul-Dec;11(3-4):128-33.
- 181 Itokawa H; Morris-Natschke SL; Akiyama T; Lee KH; Plant-derived natural product research aimed at new drug discovery. *J Nat Med.* 2008 Jul;62(3):263-80.
- 182 Ivanov A; Tyzio R; Zilberter Y; Ben-Ari Y; (R)-roscovitine, a cyclin-dependent kinase inhibitor, enhances tonic GABA inhibition in rat hippocampus. *Neuroscience.* 2008 Oct 2;156(2):277-88.
- 183 Izumi E; Ueda-Nakamura T; Dias Filho BP; Veiga Júnior VF; Nakamura CV; Natural products and Chagas' disease: a review of plant compounds studied for activity against *Trypanosoma cruzi*. *Nat Prod Rep.* 2011 Apr 23;28(4):809-823.
- 184 Jacqueline C Wootton; Development of HerbMed: an interactive, evidence-based herbal database. *Ethnomedicine and Drug Discovery.* 2002:55-60.
- 185 Jagtap UB; Bapat VA; Artocarpus: a review of its traditional uses, phytochemistry and pharmacology. *J Ethnopharmacol.* 2010 May 27;129(2):142-66.
- 186 Jain A; Katewa SS; Galav PK; Sharma P; Medicinal plant diversity of Sitamata wildlife sanctuary, Rajasthan, India. *J Ethnopharmacol.* 2005 Nov 14;102(2):143-57.
- 187 Jassim SA; Naji MA; Novel antiviral agents: a medicinal plant perspective. *J Appl Microbiol.* 2003;95(3):412-27.
- 188 Jensen AG; Ndjoko K; Wolfender JL; Hostettmann K; Camponovo F; Soldati F; Liquid chromatography-atmospheric pressure chemical ionisation/mass spectrometry: a rapid and selective method for the quantitative determination of ginkgolides and bilobalide in ginkgo leaf extracts and phytopharmaceuticals. *Phytochem Anal.* 2002 Jan-Feb;13(1):31-8.
- 189 Ji B; Lefrançois S; Robert J; Chauffour A; Truffot C; Jarlier V; In vitro and in vivo activities of rifampin, streptomycin, amikacin, moxifloxacin, R207910, linezolid, and PA-824 against *Mycobacterium ulcerans*. *Antimicrob Agents Chemother.* 2006 Jun;50(6):1921-6.
- 190 Jiratchariyakul W; Wiwat C; Vongsakul M; Somanabandhu A; Leelamanit W; Fujii I; Suwannaroj N; Ebizuka Y; HIV inhibitor from Thai bitter gourd. *Planta Med.* 2001 Jun;67(4):350-3.

- 191 Johansson L; Lindskog A; Silfversparre G; Cimander C; Nielsen KF; Lidén G; Shikimic acid production by a modified strain of *E. coli* (W3110.shik1) under phosphate-limited and carbon-limited conditions. *Biotechnol Bioeng.* 2005 Dec 5;92(5):541-52.
- 192 John N. A. Hooper; Robert J. Capon; Clive P. Keenan; David L. parry; Neil smit; Chemotaxonomy of Marine Sponges: Families Microcionidae, Raspailiidae and Axinellidae, and their Relationships with other Families in the Orders Poecilosclerida and Axinellida (Porifera : Demospongiae). *Invertebr. Taxon.* 1992, 6, 261-301.
- 193 Jonville MC; Kodja H; Humeau L; Fournel J; De Mol P; Cao M; Angenot L; Frédérich M; Screening of medicinal plants from Reunion Island for antimalarial and cytotoxic activity. *J Ethnopharmacol.* 2008 Dec 8;120(3):382-6.
- 194 Jouad H; Haloui M; Rhouiouani H; El Hilaly J; Eddouks M; Ethnobotanical survey of medicinal plants used for the treatment of diabetes, cardiac and renal diseases in the North centre region of Morocco (Fez-Boulemane). *J Ethnopharmacol.* 2001 Oct;77(2-3):175-82.
- 195 Kähkönen MP; Hopia AI; Vuorela HJ; Rauha JP; Pihlaja K; Kujala TS; Heinonen M; Antioxidant activity of plant extracts containing phenolic compounds. *J Agric Food Chem.* 1999 Oct;47(10):3954-62.
- 196 Kamatou GP; Makunga NP; Ramogola WP; Viljoen AM; South African *Salvia* species: a review of biological activities and phytochemistry. *J Ethnopharmacol.* 2008 Oct 28;119(3):664-72.
- 197 Kambizi L; Afolayan AJ; An ethnobotanical study of plants used for the treatment of sexually transmitted diseases (njovhera) in Guruve District, Zimbabwe. *J Ethnopharmacol.* 2001 Sep;77(1):5-9.
- 198 Kang BY; Chung SW; Kim SH; Ryu SY; Kim TS; Inhibition of interleukin-12 and interferon-gamma production in immune cells by tanshinones from *Salvia miltiorrhiza*. *Immunopharmacology.* 2000 Sep;49(3):355-61.
- 199 Kannan M; Saxena R; Adiguzel C; Fareed J; An update on the prevalence and characterization of H-PF4 antibodies in Asian-Indian patients. *Semin Thromb Hemost.* 2009 Apr;35(3):337-43.
- 200 Kashiwada Y; Hashimoto F; Cosentino LM; Chen CH; Garrett PE; Lee KH; Betulinic acid and dihydrobetulinic acid derivatives as potent anti-HIV agents. *J Med Chem.* 1996 Mar 1;39(5):1016-7.
- 201 Kashman Y; Gustafson KR; Fuller RW; Cardellina JH 2nd; McMahon JB; Currens MJ; Buckheit RW Jr; Hughes SH; Cragg GM; Boyd MR; The calanolides, a novel HIV-inhibitory class of coumarin derivatives from the tropical rainforest tree, *Calophyllum lanigerum*. *J Med Chem.* 1992 Jul 24;35(15):2735-43.
- 202 Kazmierski WM; Kenakin TP; Gudmundsson KS; Peptide, peptidomimetic and small-molecule drug discovery targeting HIV-1 host-cell attachment and entry through gp120, gp41, CCR5 and CXCR4. *Chem Biol Drug Des.* 2006 Jan;67(1):13-26.
- 203 Kelmanson JE; Jäger AK; van Staden J; Zulu medicinal plants with antibacterial activity. *J Ethnopharmacol.* 2000 Mar;69(3):241-6.
- 204 Kenneth D Thomson; Herbal extracts and compounds active against herpes simplex virus. *Lead Molecules from Natural Products.* 2006:65-86.
- 205 Khaki A; Novin MG; Khaki AA; Nouri M; Sanati E; Nikmanesh M; Comparative study of the effects of gentamicin, neomycin, streptomycin and ofloxacin antibiotics on sperm parameters and testis apoptosis in rats. *Pak J Biol Sci.* 2008 Jul 1;11(13):1683-9.
- 206 Khan MT; Lampronti I; Martello D; Bianchi N; Jabbar S; Choudhuri MS; Datta BK; Gambari R; Identification of pyrogallol as an antiproliferative compound present in extracts from the medicinal plant *Emblica officinalis*: effects on in vitro cell growth of human tumor cell lines. *Int J Oncol.* 2002 Jul;21(1):187-92.
- 207 Khor TO; Yu S; Kong AN; Dietary cancer chemopreventive agents - targeting inflammation and Nrf2 signaling pathway. *Planta Med.* 2008 Oct;74(13):1540-7.
- 208 Kikelj D; Peptidomimetic thrombin inhibitors. *Pathophysiol Haemost Thromb.* 2003 Sep-2004 Dec;33(5-6):487-91.
- 209 Kim DJ; Huh JH; Yang YY; Kang CM; Lee IH; Hyun CG; Hong SK; Suh JW; Accumulation of S-adenosyl-L-methionine enhances production of actinorhodin but inhibits sporulation in *Streptomyces*

lividans TK23. *J Bacteriol.* 2003 Jan;185(2):592-600.

- 
- 210 Kinghorn AD; Chin YW; Swanson SM; Discovery of natural product anticancer agents from biodiverse organisms. *Curr Opin Drug Discov Devel.* 2009 Mar;12(2):189-96.
- 
- 211 Kinghorn AD; Su BN; Jang DS; Chang LC; Lee D; Gu JQ; Carcache-Blanco EJ; Pawlus AD; Lee SK; Park EJ; Cuendet M; Gills JJ; Bhat K; Park HS; Mata-Greenwood E; Song LL; Jang M; Pezzuto JM; Natural inhibitors of carcinogenesis. *Planta Med.* 2004 Aug;70(8):691-705.
- 
- 212 Kissau L; Stahl P; Mazitschek R; Giannis A; Waldmann H; Development of natural product-derived receptor tyrosine kinase inhibitors based on conservation of protein domain fold. *J Med Chem.* 2003 Jul 3;46(14):2917-31.
- 
- 213 Kittakoop P; Wanasith S; Watts P; Kramyu J; Tanticharoen M; Thebtaranonth Y; Potent antiviral potamogetonyde and potamogetonol, new furanoid labdane diterpenes from *Potamogeton malaianus*. *J Nat Prod.* 2001 Mar;64(3):385-8.
- 
- 214 Koehn FE; Carter GT; The evolving role of natural products in drug discovery. *Nat Rev Drug Discov.* 2005 Mar;4(3):206-20.
- 
- 215 Kojiri K; Kondo H; Yoshinari T; Arakawa H; Nakajima S; Satoh F; Kawamura K; Okura A; Suda H; Okanishi M; A new antitumor substance BE-13793C, produced by a streptomycete. Taxonomy, fermentation, isolation, structure determination and biological activity. *J Antibiot (Tokyo).* 1991 Jul;44(7):723-8.
- 
- 216 Kokoska L; Polesny Z; Rada V; Nepovim A; Vanek T; Screening of some Siberian medicinal plants for antimicrobial activity. *J Ethnopharmacol.* 2002 Sep;82(1):51-3.
- 
- 217 Kombarov R; Altieri A; Genis D; Kirpichenok M; Kochubey V; Rakitina N; Titarenko Z; BioCores: identification of a drug/natural product-based privileged structural motif for small-molecule lead discovery. *Mol Divers.* 2010 Feb;14(1):193-200.
- 
- 218 Kong F; Carter GT; Structure determination of glycinocins A to D, further evidence for the cyclic structure of the amphomycin antibiotics. *J Antibiot (Tokyo).* 2003 Jun;56(6):557-64.
- 
- 219 König GM; Kehraus S; Seibert SF; Abdel-Lateff A; Müller D; Natural products from marine organisms and their associated microbes. *Chembiochem.* 2006 Feb;7(2):229-38.
- 
- 220 Kubo I; Yokokawa Y; Kinst-Hori I; Tyrosinase inhibitors from Bolivian medicinal plants. *J Nat Prod.* 1995 May;58(5):739-43.
- 
- 221 Kuete V; Potential of Cameroonian plants and derived products against microbial infections: a review. *Planta Med.* 2010 Oct;76(14):1479-91.
- 
- 222 Kumar S; Ziείς K; Wiegrebe W; Müller K; Medicinal plants from nepal: evaluation as inhibitors of leukotriene biosynthesis. *J Ethnopharmacol.* 2000 Jun;70(3):191-5.
- 
- 223 Kumar VP; Chauhan NS; Padh H; Rajani M; Search for antibacterial and antifungal agents from selected Indian medicinal plants. *J Ethnopharmacol.* 2006 Sep 19;107(2):182-8.
- 
- 224 Kumarasamy Y; Cox PJ; Jaspars M; Nahar L; Sarker SD; Screening seeds of Scottish plants for antibacterial activity. *J Ethnopharmacol.* 2002 Nov;83(1-2):73-7.
- 
- 225 Kurokawa M; Nagasaka K; Hirabayashi T; Uyama S; Sato H; Kageyama T; Kadota S; Ohyama H; Hozumi T; Namba T; Efficacy of traditional herbal medicines in combination with acyclovir against herpes simplex virus type 1 infection in vitro and in vivo. *Antiviral Res.* 1995 May;27(1-2):19-37.
- 
- 226 Lanternier F; Lortholary O; Liposomal amphotericin B: what is its role in 2008? *Clin Microbiol Infect.* 2008 May;14 Suppl 4:71-83.
- 
- 227 Larsen TO; Smedsgaard J; Nielsen KF; Hansen ME; Frisvad JC; Phenotypic taxonomy and metabolite profiling in microbial drug discovery. *Nat Prod Rep.* 2005 Dec;22(6):672-95.

- 228 Leadlay PF; Staunton J; Oliynyk M; Bisang C; Cortés J; Frost E; Hughes-Thomas ZA; Jones MA; Kendrew SG; Lester JB; Long PF; McArthur HA; McCormick EL; Oliynyk Z; Stark CB; Wilkinson CJ; Engineering of complex polyketide biosynthesis--insights from sequencing of the monensin biosynthetic gene cluster. *J Ind Microbiol Biotechnol.* 2001 Dec;27(6):360-7.
- 229 Lebar MD; Heimbegner JL; Baker BJ; Cold-water marine natural products. *Nat Prod Rep.* 2007 Aug;24(4):774-97.
- 230 Leduc C; Coonishish J; Haddad P; Cuerrier A; Plants used by the Cree Nation of Eeyou Istchee (Quebec, Canada) for the treatment of diabetes: A novel approach in quantitative ethnobotany. *J Ethnopharmacol.* 2006 Apr 21;105(1-2):55-63.
- 231 Lee DS; Lee JM; Kim SU; Chang KT; Lee SH; Ceftezole, a cephem antibiotic, is an alpha-glucosidase inhibitor with in vivo anti-diabetic activity. *Int J Mol Med.* 2007 Sep;20(3):379-83.
- 232 Lee KH; Current developments in the discovery and design of new drug candidates from plant natural product leads. *J Nat Prod.* 2004 Feb;67(2):273-83.
- 233 Lee KH; Discovery and development of natural product-derived chemotherapeutic agents based on a medicinal chemistry approach. *J Nat Prod.* 2010 Mar 26;73(3):500-16.
- 234 Lee KH; Novel antitumor agents from higher plants. *Med Res Rev.* 1999 Nov;19(6):569-96.
- 235 Lee TT; Kashiwada Y; Huang L; Snider J; Cosentino M; Lee KH; Suksdorf: an anti-HIV principle from *Lomatium suksdorfii*, its structure-activity correlation with related coumarins, and synergistic effects with anti-AIDS nucleosides. *Bioorg Med Chem.* 1994 Oct;2(10):1051-6.
- 236 Leonti M; Sticher O; Heinrich M; Medicinal plants of the Popoluca, México: organoleptic properties as indigenous selection criteria. *J Ethnopharmacol.* 2002 Aug;81(3):307-15.
- 237 Leporatti ML; Ivancheva S; Preliminary comparative analysis of medicinal plants used in the traditional medicine of Bulgaria and Italy. *J Ethnopharmacol.* 2003 Aug;87(2-3):123-42.
- 238 Lev E; Amar Z; Ethnopharmacological survey of traditional drugs sold in the Kingdom of Jordan. *J Ethnopharmacol.* 2002 Oct;82(2-3):131-45.
- 239 Lewis RJ; Garcia ML; Therapeutic potential of venom peptides. *Nat Rev Drug Discov.* 2003 Oct;2(10):790-802.
- 240 Li BQ; Fu T; Gong WH; Dunlop N; Kung H; Yan Y; Kang J; Wang JM; The flavonoid baicalin exhibits anti-inflammatory activity by binding to chemokines. *Immunopharmacology.* 2000 Sep;49(3):295-306.
- 241 Li RC; Yung L; Cheng NC; Protein binding and antimicrobial activity of ceftriaxone: comparative assessments by gradient plate technique and time-kill study. *J Chemother.* 2004 Dec;16(6):524-9.
- 242 Li RW; David Lin G; Myers SP; Leach DN; Anti-inflammatory activity of Chinese medicinal vine plants. *J Ethnopharmacol.* 2003 Mar;85(1):61-7.
- 243 Li RW; Myers SP; Leach DN; Lin GD; Leach G; A cross-cultural study: anti-inflammatory activity of Australian and Chinese plants. *J Ethnopharmacol.* 2003 Mar;85(1):25-32.
- 244 Li SM; Prenylated indole derivatives from fungi: structure diversity, biological activities, biosynthesis and chemoenzymatic synthesis. *Nat Prod Rep.* 2010 Jan;27(1):57-78.
- 245 Li WL; Zheng HC; Bukuru J; De Kimpe N; Natural medicines used in the traditional Chinese medical system for therapy of diabetes mellitus. *J Ethnopharmacol.* 2004 May;92(1):1-21.
- 246 Liaw CC; Wu TY; Chang FR; Wu YC; Historic perspectives on Annonaceous acetogenins from the chemical bench to preclinical trials. *Planta Med.* 2010 Sep;76(13):1390-404.
- 247 Libman A; Bouamanivong S; Southavong B; Sydara K; Soejarto DD; Medicinal plants: an important asset to health care in a region of Central Laos. *J Ethnopharmacol.* 2006 Jul 19;106(3):303-11.
- 248 Limem-Ben Amor I; Boubaker J; Ben Sgaier M; Skandrani I; Bhourri W; Neffati A; Kilani S; Bouhleb I; Ghedira K; Chekir-Ghedira L; Phytochemistry and biological activities of *Phlomis* species. *J Ethnopharmacol.* 2009 Sep 7;125(2):183-202.

- 249 Lin J; Puckree T; Mvelase TP; Anti-diarrhoeal evaluation of some medicinal plants used by Zulu traditional healers. *J Ethnopharmacol.* 2002 Jan;79(1):53-6.
- 250 Lin LC; Kuo YC; Chou CJ; Anti-herpes simplex virus type-1 flavonoids and a new flavanone from the root of *Limonium sinense*. *Planta Med.* 2000 May;66(4):333-6.
- 251 Littleton J; Falcone D; Davies HM; Rediscovering plant-based drugs. *Nat Biotechnol.* 2003 Aug;21(8):843-4.
- 252 Liu JJ; Huang RW; Lin DJ; Peng J; Zhang M; Pan X; Hou M; Wu XY; Lin Q; Chen F; Ponicidin, an ent-kaurane diterpenoid derived from a constituent of the herbal supplement PC-SPES, *Rabdosia rubescens*, induces apoptosis by activation of caspase-3 and mitochondrial events in lung cancer cells in vitro. *Cancer Invest.* 2006 Mar;24(2):136-48.
- 253 Locher C; Currie L; Revisiting kinos--an Australian perspective. *J Ethnopharmacol.* 2010 Mar 24;128(2):259-67.
- 254 Lopez A; Hudson JB; Towers GH; Antiviral and antimicrobial activities of Colombian medicinal plants. *J Ethnopharmacol.* 2001 Oct;77(2-3):189-96.
- 255 Lourens AC; Viljoen AM; van Heerden FR; South African *Helichrysum* species: a review of the traditional uses, biological activity and phytochemistry. *J Ethnopharmacol.* 2008 Oct 28;119(3):630-52.
- 256 Lucy Hoareau; Edgar J. DaSilva; Medicinal plants: a re-emerging health aid. *EJB Electronic Journal of Biotechnology.* 1999 Aug;2(2): 56-70.
- 257 Lukhoba CW; Simmonds MS; Paton AJ; *Plectranthus*: a review of ethnobotanical uses. *J Ethnopharmacol.* 2006 Jan 3;103(1):1-24.
- 258 Ma SC; Du J; But PP; Deng XL; Zhang YW; Ooi VE; Xu HX; Lee SH; Lee SF; Antiviral Chinese medicinal herbs against respiratory syncytial virus. *J Ethnopharmacol.* 2002 Feb;79(2):205-11.
- 259 Ma X; Gang DR; The *Lycopodium* alkaloids. *Nat Prod Rep.* 2004 Dec;21(6):752-72.
- 260 MacMillan J; Occurrence of Gibberellins in Vascular Plants, Fungi, and Bacteria. *J Plant Growth Regul.* 2001 Dec;20(4):387-442.
- 261 Madari H; Panda D; Wilson L; Jacobs RS; Dicoumarol: a unique microtubule stabilizing natural product that is synergistic with Taxol. *Cancer Res.* 2003 Mar 15;63(6):1214-20.
- 262 Magkos F; Kavouras SA; Caffeine and ephedrine: physiological, metabolic and performance-enhancing effects. *Sports Med.* 2004;34(13):871-89.
- 263 Mann J; Natural products as immunosuppressive agents. *Nat Prod Rep.* 2001 Aug;18(4):417-30.
- 264 Mann J; Natural products in cancer chemotherapy: past, present and future. *Nat Rev Cancer.* 2002 Feb;2(2):143-8.
- 265 Mantle D; Eddeb F; Pickering AT; Comparison of relative antioxidant activities of British medicinal plant species in vitro. *J Ethnopharmacol.* 2000 Sep;72(1-2):47-51.
- 266 Manyam BV; Paralysis agitans and levodopa in "Ayurveda": ancient Indian medical treatise. *Mov Disord.* 1990;5(1):47-8.
- 267 Manzo E; van Soest R; Matainaho L; Roberge M; Andersen RJ; Ceratamines A and B, antimetabolic heterocyclic alkaloids isolated from the marine sponge *Pseudoceratina* sp. collected in Papua New Guinea. *Org Lett.* 2003 Nov 27;5(24):4591-4.
- 268 Matu EN; van Staden J; Antibacterial and anti-inflammatory activities of some plants used for medicinal purposes in Kenya. *J Ethnopharmacol.* 2003 Jul;87(1):35-41.
- 269 Mau JL; Lin HC; Chen CC; Antioxidant properties of several medicinal mushrooms. *J Agric Food Chem.* 2002 Oct 9;50(21):6072-7.
- 270 Maurice M Iwu; Introduction: therapeutic agents from ethnomedicine. *Ethnomedicine and Drug Discovery.* 2002:1-22.
- 271 McChesney JD; Venkataraman SK; Henri JT; Plant natural products: back to the future or into extinction? *Phytochemistry.* 2007 Jul;68(14):2015-22.
- 272 McCloskey L; Moore T; Niconovich N; Donald B; Broskey J; Jakielaszek C; Rittenhouse S; Coleman K; In vitro activity of gemifloxacin against a broad range of recent clinical isolates from the USA. *J Antimicrob*



Chemother. 2000 Apr;45 Suppl 1:13-21.

- 
- 273 McCurdy CR; Scully SS; Analgesic substances derived from natural products (natureceuticals). *Life Sci.* 2005 Dec 22;78(5):476-84.
- 
- 274 McGaw LJ; Lall N; Meyer JJ; Eloff JN; The potential of South African plants against Mycobacterium infections. *J Ethnopharmacol.* 2008 Oct 28;119(3):482-500.
- 
- 275 Meng Q; Niu Y; Niu X; Roubin RH; Hanrahan JR; Ethnobotany, phytochemistry and pharmacology of the genus *Caragana* used in traditional Chinese medicine. *J Ethnopharmacol.* 2009 Jul 30;124(3):350-68.
- 
- 276 Michael W Fowler; Plants, medicines and man. *J Sci Food Agric.* 2006 Aug;86:1797-1804
- 
- 277 Miglietta A; Bozzo F; Gabriel L; Bocca C; Microtubule-interfering activity of parthenolide. *Chem Biol Interact.* 2004 Oct 15;149(2-3):165-73.
- 
- 278 Miller-Martini DM; Chan RY; Ip NY; Sheu SJ; Wong YH; A reporter gene assay for the detection of phytoestrogens in traditional Chinese medicine. *Phytother Res.* 2001 Sep;15(6):487-92.
- 
- 279 Min BS; Jung HJ; Lee JS; Kim YH; Bok SH; Ma CM; Nakamura N; Hattori M; Bae K; Inhibitory effect of triterpenes from *Crataegus pinatifida* on HIV-I protease. *Planta Med.* 1999 May;65(4):374-5.
- 
- 280 Miraldi E; Ferri S; Mostaghimi V; Botanical drugs and preparations in the traditional medicine of West Azerbaijan (Iran). *J Ethnopharmacol.* 2001 May;75(2-3):77-87.
- 
- 281 Mohammad Shoeb; Anticancer agents from medicinal plants. *Bangladesh J Pharmacol.* 2006; 1: 35-41.
- 
- 282 Mølgaard P; Nielsen SB; Rasmussen DE; Drummond RB; Makaza N; Andreassen J; Anthelmintic screening of Zimbabwean plants traditionally used against schistosomiasis. *J Ethnopharmacol.* 2001 Mar 3;74(3):257-64.
- 
- 283 Molnár I; Gibson DM; Krasnoff SB; Secondary metabolites from entomopathogenic Hypocrealean fungi. *Nat Prod Rep.* 2010 Sep 18;27(9):1241-75.
- 
- 284 More G; Tshikalange TE; Lall N; Botha F; Meyer JJ; Antimicrobial activity of medicinal plants against oral microorganisms. *J Ethnopharmacol.* 2008 Oct 28;119(3):473-7.
- 
- 285 Morita H; Arisaka M; Yoshida N; Kobayashi J; Serratezomines A--C, new alkaloids from *Lycopodium serratum* var. *serratum*. *J Org Chem.* 2000 Sep 22;65(19):6241-5.
- 
- 286 Morita H; Hirasawa Y; Kobayashi J; Himeradine A, a novel C27N3-type alkaloid from *Lycopodium chinense*. *J Org Chem.* 2003 May 30;68(11):4563-6.
- 
- 287 Mortari MR; Cunha AO; Ferreira LB; dos Santos WF; Neurotoxins from invertebrates as anticonvulsants: from basic research to therapeutic application. *Pharmacol Ther.* 2007 May;114(2):171-83.
- 
- 288 Moutsatsou P; The spectrum of phytoestrogens in nature: our knowledge is expanding. *Hormones (Athens).* 2007 Jul-Sep;6(3):173-93.
- 
- 289 Mukherjee PK; Maiti K; Mukherjee K; Houghton PJ; Leads from Indian medicinal plants with hypoglycemic potentials. *J Ethnopharmacol.* 2006 Jun 15;106(1):1-28.
- 
- 290 Müller-Kuhrt L; Putting nature back into drug discovery. *Nat Biotechnol.* 2003 Jun;21(6):602.
- 
- 291 Muñoz V; Sauvain M; Bourdy G; Callapa J; Rojas I; Vargas L; Tae A; Deharo E; The search for natural bioactive compounds through a multidisciplinary approach in Bolivia. Part II. Antimalarial activity of some plants used by Mosecene indians. *J Ethnopharmacol.* 2000 Feb;69(2):139-55.
- 
- 292 Naganawa H; Hamada M; Maeda K; Okami Y; Takeushi T; Laspartomycin, a new anti-staphylococcal peptide. *J Antibiot (Tokyo).* 1968 Jan;21(1):55-62.
- 
- 293 Nagle A; Hur W; Gray NS; Antimitotic agents of natural origin. *Curr Drug Targets.* 2006 Mar;7(3):305-26.
- 
- 294 Naithani R; Huma LC; Holland LE; Shukla D; McCormick DL; Mehta RG; Moriarty RM; Antiviral activity of phytochemicals: a comprehensive review. *Mini Rev Med Chem.* 2008 Oct;8(11):1106-33.

- 295 Nakano H; Omura S; Chemical biology of natural indolocarbazole products: 30 years since the discovery of staurosporine. *J Antibiot (Tokyo)*. 2009 Jan;62(1):17-26.
- 296 Nam NH; Naturally occurring NF-kappaB inhibitors. *Mini Rev Med Chem*. 2006 Aug;6(8):945-51.
- 297 Nawawi A; Ma C; Nakamura N; Hattori M; Kurokawa M; Shiraki K; Kashiwaba N; Ono M; Anti-herpes simplex virus activity of alkaloids isolated from *Stephania cepharantha*. *Biol Pharm Bull*. 1999 Mar;22(3):268-74.
- 298 Neal CP; Berry DP; Doucas H; Manson MM; Steward W; Garcea G; Clinical aspects of natural anti-angiogenic drugs. *Curr Drug Targets*. 2006 Mar;7(3):371-83.
- 299 Neto CC; Owens CW; Langfield RD; Comeau AB; Onge JS; Vaisberg AJ; Hammond GB; Antibacterial activity of some Peruvian medicinal plants from the Callejon de Huaylas. *J Ethnopharmacol*. 2002 Jan;79(1):133-8.
- 300 Nett M; Ikeda H; Moore BS; Genomic basis for natural product biosynthetic diversity in the actinomycetes. *Nat Prod Rep*. 2009 Nov;26(11):1362-84.
- 301 Nett M; König GM; The chemistry of gliding bacteria. *Nat Prod Rep*. 2007 Dec;24(6):1245-61.
- 302 Newman DJ; Cragg GM; Advanced preclinical and clinical trials of natural products and related compounds from marine sources. *Curr Med Chem*. 2004 Jul;11(13):1693-713.
- 303 Newman DJ; Cragg GM; Marine natural products and related compounds in clinical and advanced preclinical trials. *J Nat Prod*. 2004 Aug;67(8):1216-38.
- 304 Newman DJ; Cragg GM; Natural products as sources of new drugs over the last 25 years. *J Nat Prod*. 2007 Mar;70(3):461-77.
- 305 Newman DJ; Cragg GM; Snader KM; Natural products as sources of new drugs over the period 1981-2002. *J Nat Prod*. 2003 Jul;66(7):1022-37.
- 306 Newman DJ; Cragg GM; Snader KM; The influence of natural products upon drug discovery. *Nat Prod Rep*. 2000 Jun;17(3):215-34.
- 307 Newton SM; Lau C; Gurcha SS; Besra GS; Wright CW; The evaluation of forty-three plant species for in vitro antimycobacterial activities; isolation of active constituents from *Psoralea corylifolia* and *Sanguinaria canadensis*. *J Ethnopharmacol*. 2002 Jan;79(1):57-67.
- 308 Ngueyem TA; Brusotti G; Caccialanza G; Finzi PV; The genus *Bridelia*: a phytochemical and ethnopharmacological review. *J Ethnopharmacol*. 2009 Jul 30;124(3):339-49.
- 309 Nonaka G; Nishioka I; Nishizawa M; Yamagishi T; Kashiwada Y; Dutschman GE; Bodner AJ; Kilkuskie RE; Cheng YC; Lee KH; Anti-AIDS agents, 2: Inhibitory effects of tannins on HIV reverse transcriptase and HIV replication in H9 lymphocyte cells. *J Nat Prod*. 1990 May-Jun;53(3):587-95.
- 310 Oberlies NH; Kroll DJ; Camptothecin and taxol: historic achievements in natural products research. *J Nat Prod*. 2004 Feb;67(2):129-35.
- 311 O'Hanlon LH; Scientists are searching the seas for cancer drugs. *J Natl Cancer Inst*. 2006 May 17;98(10):662-3.
- 312 Oku N; Gustafson KR; Cartner LK; Wilson JA; Shigematsu N; Hess S; Pannell LK; Boyd MR; McMahon JB; Neamphamide A, a new HIV-inhibitory depsipeptide from the Papua New Guinea marine sponge *Neamphius huxleyi*. *J Nat Prod*. 2004 Aug;67(8):1407-11.
- 313 Olano C; Méndez C; Salas JA; Antitumor compounds from actinomycetes: from gene clusters to new derivatives by combinatorial biosynthesis. *Nat Prod Rep*. 2009 May;26(5):628-60.
- 314 Orhan I; Sener B; Choudhary MI; Khalid A; Acetylcholinesterase and butyrylcholinesterase inhibitory activity of some Turkish medicinal plants. *J Ethnopharmacol*. 2004 Mar;91(1):57-60.
- 315 Orth HC; Rentel C; Schmidt PC; Isolation, purity analysis and stability of hyperforin as a standard material from *Hypericum perforatum* L. *J Pharm Pharmacol*. 1999 Feb;51(2):193-200.
- 316 Oseni T; Patel R; Pyle J; Jordan VC; Selective estrogen receptor modulators and phytoestrogens. *Planta Med*. 2008 Oct;74(13):1656-65.
- 317 Ososki AL; Kennelly EJ; Phytoestrogens: a review of the present state of research. *Phytother Res*. 2003 Sep;17(8):845-69.

- 318 Otshudi AL; Apers S; Pieters L; Claeys M; Pannecouque C; De Clercq E; Van Zeebroeck A; Lauwers S; Frédéric M; Foriers A; Biologically active bisbenzylisoquinoline alkaloids from the root bark of *Epinetrum villosum*. *J Ethnopharmacol.* 2005 Oct 31;102(1):89-94.
- 319 Overall CM; Kleifeld O; Tumour microenvironment - opinion: validating matrix metalloproteinases as drug targets and anti-targets for cancer therapy. *Nat Rev Cancer.* 2006 Mar;6(3):227-39.
- 320 Palombo EA; Phytochemicals from traditional medicinal plants used in the treatment of diarrhoea: modes of action and effects on intestinal function. *Phytother Res.* 2006 Sep;20(9):717-24.
- 321 Palombo EA; Semple SJ; Antibacterial activity of traditional Australian medicinal plants. *J Ethnopharmacol.* 2001 Oct;77(2-3):151-7.
- 322 Paraskeva MP; van Vuuren SF; van Zyl RL; Davids H; Viljoen AM; The in vitro biological activity of selected South African Commiphora species. *J Ethnopharmacol.* 2008 Oct 28;119(3):673-9.
- 323 Pardo de Santayana M; Blanco E; Morales R; Plants known as té in Spain: an ethno-pharmaco-botanical review. *J Ethnopharmacol.* 2005 Apr 8;98(1-2):1-19.
- 324 Parra FM; Igea JM; Martín JA; Alonso MD; Lezaun A; Sainz T; Serum sickness-like syndrome associated with cefaclor therapy. *Allergy.* 1992 Aug;47(4 Pt 2):439-40.
- 325 Parvez S; Kang M; Chung HS; Bae H; Naturally occurring tyrosinase inhibitors: mechanism and applications in skin health, cosmetics and agriculture industries. *Phytother Res.* 2007 Sep;21(9):805-16.
- 326 Paterson I; Anderson EA; Chemistry. The renaissance of natural products as drug candidates. *Science.* 2005 Oct 21;310(5747):451-3.
- 327 Patil AD; Freyer AJ; Eggleston DS; Haltiwanger RC; Bean MF; Taylor PB; Caranfa MJ; Breen AL; Bartus HR; Johnson RK; The inophyllums, novel inhibitors of HIV-1 reverse transcriptase isolated from the Malaysian tree, *Calophyllum inophyllum* Linn. *J Med Chem.* 1993 Dec 24;36(26):4131-8.
- 328 Patwardhan B; Gautam M; Botanical immunodrugs: scope and opportunities. *Drug Discov Today.* 2005 Apr 1;10(7):495-502.
- 329 Peláez F; The historical delivery of antibiotics from microbial natural products--can history repeat? *Biochem Pharmacol.* 2006 Mar 30;71(7):981-90.
- 330 Perabo FG; Von Löw EC; Ellinger J; von Rücker A; Müller SC; Bastian PJ; Soy isoflavone genistein in prevention and treatment of prostate cancer. *Prostate Cancer Prostatic Dis.* 2008;11(1):6-12.
- 331 Peter Proksch; RuAngelie Edrada-Ebel; Rainer Ebel; Drugs from the Sea - Opportunities and Obstacles. *Drugs.* 2003 Mar;1:5-17.
- 332 Petković H; Cullum J; Hranueli D; Hunter IS; Perić-Concha N; Pigac J; Thamchaipenet A; Vujaklija D; Long PF; Genetics of *Streptomyces rimosus*, the oxytetracycline producer. *Microbiol Mol Biol Rev.* 2006 Sep;70(3):704-28.
- 333 Pfisterer PH; Wolber G; Efferth T; Rollinger JM; Stuppner H; Natural products in structure-assisted design of molecular cancer therapeutics. *Curr Pharm Des.* 2010 May;16(15):1718-41.
- 334 Pillay P; Maharaj VJ; Smith PJ; Investigating South African plants as a source of new antimalarial drugs. *J Ethnopharmacol.* 2008 Oct 28;119(3):438-54.
- 335 Pisha E; Chai H; Lee IS; Chagwedera TE; Farnsworth NR; Cordell GA; Beecher CW; Fong HH; Kinghorn AD; Brown DM; Discovery of betulinic acid as a selective inhibitor of human melanoma that functions by induction of apoptosis. *Nat Med.* 1995 Oct;1(10):1046-51.
- 336 Pittler MH; Ernst E; Complementary therapies for reducing body weight: a systematic review. *Int J Obes (Lond).* 2005 Sep;29(9):1030-8.
- 337 Pommier Y; Topoisomerase I inhibitors: camptothecins and beyond. *Nat Rev Cancer.* 2006 Oct;6(10):789-802.
- 338 Pompei R; Flore O; Marccialis MA; Pani A; Loddo B; Glycyrrhizic acid inhibits virus growth and inactivates virus particles. *Nature.* 1979 Oct 25;281(5733):689-90.
- 339 Prasad S; Phromnoi K; Yadav VR; Chaturvedi MM; Aggarwal BB; Targeting inflammatory pathways by flavonoids for prevention and treatment of cancer. *Planta Med.* 2010 Aug;76(11):1044-63.

- 340 Prevatt-Smith KM; Prisinzano TE; New therapeutic potential for psychoactive natural products. *Nat Prod Rep.* 2010 Jan;27(1):23-31.
- 341 Proksch P; Edrada RA; Ebel R; Drugs from the seas - current status and microbiological implications. *Appl Microbiol Biotechnol.* 2002 Jul;59(2-3):125-34.
- 342 Puri A; Sahai R; Singh KL; Saxena RP; Tandon JS; Saxena KC; Immunostimulant activity of dry fruits and plant materials used in indian traditional medical system for mothers after child birth and invalids. *J Ethnopharmacol.* 2000 Jul;71(1-2):89-92.
- 343 Putnam SE; Scutt AM; Bicknell K; Priestley CM; Williamson EM; Natural products as alternative treatments for metabolic bone disorders and for maintenance of bone health. *Phytother Res.* 2007 Feb;21(2):99-112.
- 344 Quesada AR; Muñoz-Chápuli R; Medina MA; Anti-angiogenic drugs: from bench to clinical trials. *Med Res Rev.* 2006 Jul;26(4):483-530.
- 345 Rajbhandari M; Wegner U; Jülich M; Schöpke T; Mentel R; Screening of Nepalese medicinal plants for antiviral activity. *J Ethnopharmacol.* 2001 Mar 3;74(3):251-5.
- 346 Ramsewak RS; DeWitt DL; Nair MG; Cytotoxicity, antioxidant and anti-inflammatory activities of curcumins I-III from *Curcuma longa*. *Phytomedicine.* 2000 Jul;7(4):303-8.
- 347 Rateb ME; Ebel R; Secondary metabolites of fungi from marine habitats. *Nat Prod Rep.* 2011 Feb 25;28(2):290-344.
- 348 Rempe S; Hayden JM; Robbins RA; Hoyt JC; Tetracyclines and pulmonary inflammation. *Endocr Metab Immune Disord Drug Targets.* 2007 Dec;7(4):232-6.
- 349 Ripka AS; Rich DH; Peptidomimetic design. *Curr Opin Chem Biol.* 1998 Aug;2(4):441-52.
- 350 Rishton GM; Molecular diversity in the context of leadlikeness: compound properties that enable effective biochemical screening. *Curr Opin Chem Biol.* 2008 Jun;12(3):340-51.
- 351 Rishton GM; Natural products as a robust source of new drugs and drug leads: past successes and present day issues. *Am J Cardiol.* 2008 May 22;101(10A):43D-49D.
- 352 Rook EJ; Huitema AD; van den Brink W; van Ree JM; Beijnen JH; Pharmacokinetics and pharmacokinetic variability of heroin and its metabolites: review of the literature. *Curr Clin Pharmacol.* 2006 Jan;1(1):109-18.
- 353 Rosén J; Gottfries J; Muresan S; Backlund A; Oprea TI; Novel chemical space exploration via natural products. *J Med Chem.* 2009 Apr 9;52(7):1953-62.
- 354 Rudi A; Talpir R; Kashman Y; Benayahu Y; Schleyer M; Four new C16 1,2-dioxene-polyketides from the sponge *Plakortis aff. simplex*. *J Nat Prod.* 1993 Dec;56(12):2178-82.
- 355 Saklani A; Kutty SK; Plant-derived compounds in clinical trials. *Drug Discov Today.* 2008 Feb;13(3-4):161-71.
- 356 Saleem M; Kim HJ; Ali MS; Lee YS; An update on bioactive plant lignans. *Nat Prod Rep.* 2005 Dec;22(6):696-716.
- 357 Sánchez C; Méndez C; Salas JA; Indolocarbazole natural products: occurrence, biosynthesis, and biological activity. *Nat Prod Rep.* 2006 Dec;23(6):1007-45.
- 358 Sandall DW; Satkunanathan N; Keays DA; Polidano MA; Liping X; Pham V; Down JG; Khalil Z; Livett BG; Gayler KR; A novel alpha-conotoxin identified by gene sequencing is active in suppressing the vascular response to selective stimulation of sensory nerves in vivo. *Biochemistry.* 2003 Jun 10;42(22):6904-11.
- 359 Sandberg F; Perera-Ivarsson P; El-Seedi HR; A Swedish collection of medicinal plants from Cameroon. *J Ethnopharmacol.* 2005 Dec 1;102(3):336-43.
- 360 Schmidt-Lebuhn AN; Ethnobotany, biochemistry and pharmacology of *Minthostachys* (Lamiaceae). *J Ethnopharmacol.* 2008 Aug 13;118(3):343-53.
- 361 Schmitt I; Barker FK; Phylogenetic methods in natural product research. *Nat Prod Rep.* 2009 Dec;26(12):1585-602.

- 362 Schneider I; Bucar F; Lipoxygenase inhibitors from natural plant sources. Part 1: Medicinal plants with inhibitory activity on arachidonate 5-lipoxygenase and 5-lipoxygenase[*sol*]cyclooxygenase. *Phytother Res.* 2005 Feb;19(2):81-102.
- 363 Schneider I; Bucar F; Lipoxygenase inhibitors from natural plant sources. Part 2: medicinal plants with inhibitory activity on arachidonate 12-lipoxygenase, 15-lipoxygenase and leukotriene receptor antagonists. *Phytother Res.* 2005 Apr;19(4):263-72.
- 364 Schwikkard S; van Heerden FR; Antimalarial activity of plant metabolites. *Nat Prod Rep.* 2002 Dec;19(6):675-92.
- 365 Semwal DK; Badoni R; Semwal R; Kothiyal SK; Singh GJ; Rawat U; The genus *Stephania* (Menispermaceae): chemical and pharmacological perspectives. *J Ethnopharmacol.* 2010 Nov 11;132(2):369-83.
- 366 Sezik E; Yeşilada E; Honda G; Takaishi Y; Takeda Y; Tanaka T; Traditional medicine in Turkey X. Folk medicine in Central Anatolia. *J Ethnopharmacol.* 2001 May;75(2-3):95-115.
- 367 Shang X; He X; He X; Li M; Zhang R; Fan P; Zhang Q; Jia Z; The genus *Scutellaria* an ethnopharmacological and phytochemical review. *J Ethnopharmacol.* 2010 Mar 24;128(2):279-313.
- 368 Sharma N; Sharma VK; Seo SY; Screening of some medicinal plants for anti-lipase activity. *J Ethnopharmacol.* 2005 Mar 21;97(3):453-6.
- 369 Sharpe IA; Gehrmann J; Loughnan ML; Thomas L; Adams DA; Atkins A; Palant E; Craik DJ; Adams DJ; Alewood PF; Lewis RJ; Two new classes of conopeptides inhibit the alpha1-adrenoceptor and noradrenaline transporter. *Nat Neurosci.* 2001 Sep;4(9):902-7.
- 370 Shen YC; Hsieh PW; New sesquiterpene hydroquinones from a Taiwanese marine sponge *Polyfibrospongia australis*. *J Nat Prod.* 1997 Feb;60(2):93-7.
- 371 Shibata M; Kanzaki T; Nakazawa K; Inoue M; Hitomi H; Mizuno K; Fujino M; Akira M; On glumamycin, a new antibiotic. *J Antibiot (Tokyo).* 1962 Jan;15:1-6.
- 372 Shiizaki K; Goto K; Ishige A; Komatsu Y; Bioassay of phytoestrogen in herbal medicine used for postmenopausal disorder using transformed MCF-7 cells. *Phytother Res.* 1999 Sep;13(6):498-503.
- 373 Shinwari MI; Khan MA; Folk use of medicinal herbs of Margalla Hills National Park, Islamabad. *J Ethnopharmacol.* 2000 Jan;69(1):45-56.
- 374 Shoji JI; Kozuki S; Okamoto S; Sakazaki R; Otsuka H; Studies on tsushimycin. I. Isolation and characterization of an acidic acylpeptide containing a new fatty acid. *J Antibiot (Tokyo).* 1968 Jul;21(7):439-43.
- 375 Shu YZ; Recent natural products based drug development: a pharmaceutical industry perspective. *J Nat Prod.* 1998 Aug;61(8):1053-71.
- 376 Siedle B; Hrenn A; Merfort I; Natural compounds as inhibitors of human neutrophil elastase. *Planta Med.* 2007 May;73(5):401-20.
- 377 Silva GL; Cui B; Chávez D; You M; Chai HB; Rasoanaivo P; Lynn SM; O'Neill MJ; Lewis JA; Besterman JM; Monks A; Farnsworth NR; Cordell GA; Pezzuto JM; Kinghorn AD; Modulation of the multidrug-resistance phenotype by new tropane alkaloid aromatic esters from *Erythroxylum pervillei*. *J Nat Prod.* 2001 Dec;64(12):1514-20.
- 378 Simmons TL; Andrianasolo E; McPhail K; Flatt P; Gerwick WH; Marine natural products as anticancer drugs. *Mol Cancer Ther.* 2005 Feb;4(2):333-42.
- 379 Simonsen HT; Nordskjold JB; Smitt UW; Nyman U; Palpu P; Joshi P; Varughese G; In vitro screening of Indian medicinal plants for antiplasmodial activity. *J Ethnopharmacol.* 2001 Feb;74(2):195-204.
- 380 Singh IP; Bodiwala HS; Recent advances in anti-HIV natural products. *Nat Prod Rep.* 2010 Jan 12;27(12):1781-800.
- 381 Singh R; Sharma M; Joshi P; Rawat DS; Clinical status of anti-cancer agents derived from marine sources. *Anticancer Agents Med Chem.* 2008 Aug;8(6):603-17.
- 382 Singh S; From exotic spice to modern drug? *Cell.* 2007 Sep 7;130(5):765-8.
- 383 Sipkema D; Franssen MC; Osinga R; Tramper J; Wijffels RH; Marine sponges as pharmacy. *Mar Biotechnol (NY).* 2005 May-Jun;7(3):142-62.

- 384 Skropeta D; Deep-sea natural products. *Nat Prod Rep*. 2008 Dec;25(6):1131-66.
- 
- 385 Soejarto DD; Fong HH; Tan GT; Zhang HJ; Ma CY; Franzblau SG; Gyllenhaal C; Riley MC; Kadushin MR; Pezzuto JM; Xuan LT; Hiep NT; Hung NV; Vu BM; Loc PK; Dac LX; Binh LT; Chien NQ; Hai NV; Bich TQ; Cuong NM; Southavong B; Sydara K; Bouamanivong S; Ly HM; Thuy TV; Rose WC; Dietzman GR; Ethnobotany/ethnopharmacology and mass bioprospecting: issues on intellectual property and benefit-sharing. *J Ethnopharmacol*. 2005 Aug 22;100(1-2):15-22.
- 
- 386 Soh PN; Benoit-Vical F; Are West African plants a source of future antimalarial drugs? *J Ethnopharmacol*. 2007 Nov 1;114(2):130-40.
- 
- 387 Sona Franova, et al.; Phytotherapy of cough. *Lead Molecules from Natural Products*. 2006:111-31.
- 
- 388 Song WO; Chun OK; Hwang I; Shin HS; Kim BG; Kim KS; Lee SY; Shin D; Lee SG; Soy isoflavones as safe functional ingredients. *J Med Food*. 2007 Dec;10(4):571-80.
- 
- 389 Sovak M; Seligson AL; Konas M; Hajdich M; Dolezal M; Machala M; Nagourney R; Herbal composition PC-SPES for management of prostate cancer: identification of active principles. *J Natl Cancer Inst*. 2002 Sep 4;94(17):1275-81.
- 
- 390 Srinivasan D; Nathan S; Suresh T; Lakshmana Perumalsamy P; Antimicrobial activity of certain Indian medicinal plants used in folkloric medicine. *J Ethnopharmacol*. 2001 Mar 3;74(3):217-20.
- 
- 391 Srivastava V; Negi AS; Kumar JK; Gupta MM; Khanuja SP; Plant-based anticancer molecules: a chemical and biological profile of some important leads. *Bioorg Med Chem*. 2005 Nov 1;13(21):5892-908.
- 
- 392 Staerk D; Larsen J; Larsen LA; Olafsdottir ES; Witt M; Jaroszewski JW; Selagoline, a new alkaloid from *Huperzia selago*. *Nat Prod Res*. 2004 Jun;18(3):197-203.
- 
- 393 Stafford GI; Pedersen ME; van Staden J; Jäger AK; Review on plants with CNS-effects used in traditional South African medicine against mental diseases. *J Ethnopharmacol*. 2008 Oct 28;119(3):513-37.
- 
- 394 Stahl P; Kissau L; Mazitschek R; Giannis A; Waldmann H; Natural product derived receptor tyrosine kinase inhibitors: identification of IGF1R, Tie-2, and VEGFR-3 inhibitors. *Angew Chem Int Ed Engl*. 2002 Apr 2;41(7):1174-8.
- 
- 395 Stapley EO; Jackson M; Hernandez S; Zimmerman SB; Currie SA; Mochales S; Mata JM; Woodruff HB; Hendlin D; Cephamycins, a new family of beta-lactam antibiotics. I. Production by actinomycetes, including *Streptomyces lactamdurans* sp. n. *Antimicrob Agents Chemother*. 1972 Sep;2(3):122-31.
- 
- 396 Stepp JR; Moerman DE; The importance of weeds in ethnopharmacology. *J Ethnopharmacol*. 2001 Apr;75(1):19-23.
- 
- 397 Stepp JR; The role of weeds as sources of pharmaceuticals. *J Ethnopharmacol*. 2004 Jun;92(2-3):163-6.
- 
- 398 Sultana N; Arayne MS; In vitro activity of cefadroxil, cephalexin, cefatrizine and cefpirome in presence of essential and trace elements. *Pak J Pharm Sci*. 2007 Oct;20(4):305-10.
- 
- 399 Sultana N; Arayne MS; In vitro activity of cefazolin and cefuroxime in presence of essential and trace elements. *Pak J Pharm Sci*. 2002 Jul;15(2):41-50.
- 
- 400 Sunila ES; Kuttan G; Immunomodulatory and antitumor activity of *Piper longum* Linn. and piperine. *J Ethnopharmacol*. 2004 Feb;90(2-3):339-46.
- 
- 401 Surh YJ; Kundu JK; Na HK; Nrf2 as a master redox switch in turning on the cellular signaling involved in the induction of cytoprotective genes by some chemopreventive phytochemicals. *Planta Med*. 2008 Oct;74(13):1526-39.
- 
- 402 Tabuti JR; Lye KA; Dhillon SS; Traditional herbal drugs of Bulamogi, Uganda: plants, use and administration. *J Ethnopharmacol*. 2003 Sep;88(1):19-44.
- 
- 403 Tafur S; Nelson JD; DeLong DC; Svoboda GH; Antiviral components of *Ophiorrhiza mungos*. Isolation of camptothecin and 10-methoxycamptothecin. *Lloydia*. 1976 Jul-Aug;39(4):261-2.
- 
- 404 Takayama H; Katakawa K; Kitajima M; Yamaguchi K; Aimi N; Ten new Lycopodium alkaloids having the lycopodane skeleton isolated from *Lycopodium serratum* Thunb. *Chem Pharm Bull (Tokyo)*. 2003 Oct;51(10):1163-9.

- 405 Tan BK; Vanitha J; Immunomodulatory and antimicrobial effects of some traditional chinese medicinal herbs: a review. *Curr Med Chem*. 2004 Jun;11(11):1423-30.
- 406 Tan CH; Ma XQ; Jiang SH; Zhu DY; Three new hydroxylated serratidine alkaloids from *Huperzia serrata*. *Nat Prod Lett*. 2002 Jun;16(3):149-53.
- 407 Taylor RS; Hudson JB; Manandhar NP; Towers GH; Antiviral activities of medicinal plants of southern Nepal. *J Ethnopharmacol*. 1996 Aug;53(2):97-104.
- 408 Taylor RS; Manandhar NP; Hudson JB; Towers GH; Antiviral activities of Nepalese medicinal plants. *J Ethnopharmacol*. 1996 Jul 5;52(3):157-63.
- 409 Temkitthawon P; Viyoch J; Limpeanchob N; Pongamornkul W; Sirikul C; Kumpila A; Suwanborirux K; Ingkaninan K; Screening for phosphodiesterase inhibitory activity of Thai medicinal plants. *J Ethnopharmacol*. 2008 Sep 26;119(2):214-7.
- 410 Tempfer CB; Bentz EK; Leodolter S; Tscherne G; Reuss F; Cross HS; Huber JC; Phytoestrogens in clinical practice: a review of the literature. *Fertil Steril*. 2007 Jun;87(6):1243-9.
- 411 Thakur GA; Duclos RI Jr; Makriyannis A; Natural cannabinoids: templates for drug discovery. *Life Sci*. 2005 Dec 22;78(5):454-66.
- 412 Thomas JS Carlson; Medical ethnobotanical research as a method to identify bioactive plants to treat infectious diseases. *Ethnomedicine and Drug Discovery*. 2002: 45-53.
- 413 Tomczyk M; Latté KP; Potentilla--a review of its phytochemical and pharmacological profile. *J Ethnopharmacol*. 2009 Mar 18;122(2):184-204.
- 414 Tong XT; Tan CH; Ma XQ; Wang BD; Jiang SH; Zhu DY; Miyoshianines A and B, two new lycopodium alkaloids from *Huperzia miyoshiana*. *Planta Med*. 2003 Jun;69(6):576-9.
- 415 Tshibangu JN; Chifundera K; Kaminsky R; Wright AD; König GM; Screening of African medicinal plants for antimicrobial and enzyme inhibitory activity. *J Ethnopharmacol*. 2002 Apr;80(1):25-35.
- 416 Tshikalange TE; Meyer JJ; Lall N; Muñoz E; Sancho R; Van de Venter M; Oosthuizen V; In vitro anti-HIV-1 properties of ethnobotanically selected South African plants used in the treatment of sexually transmitted diseases. *J Ethnopharmacol*. 2008 Oct 28;119(3):478-81.
- 417 Tsukamoto S; Yokosawa H; Inhibition of the ubiquitin-proteasome system by natural products for cancer therapy. *Planta Med*. 2010 Aug;76(11):1064-74.
- 418 Tulp M; Bohlin L; Functional versus chemical diversity: is biodiversity important for drug discovery? *Trends Pharmacol Sci*. 2002 May;23(5):225-31.
- 419 Usui T; Pharmaceutical prospects of phytoestrogens. *Endocr J*. 2006 Feb;53(1):7-20.
- 420 van Vuuren SF; Antimicrobial activity of South African medicinal plants. *J Ethnopharmacol*. 2008 Oct 28;119(3):462-72.
- 421 van Wyk BE; A broad review of commercially important southern African medicinal plants. *J Ethnopharmacol*. 2008 Oct 28;119(3):342-55.
- 422 van Wyk BE; A review of Khoi-San and Cape Dutch medical ethnobotany. *J Ethnopharmacol*. 2008 Oct 28;119(3):331-41.
- 423 Velentz LS; Woodside JV; Cantwell MM; Leathem AJ; Keshtgar MR; Do phytoestrogens reduce the risk of breast cancer and breast cancer recurrence? What clinicians need to know. *Eur J Cancer*. 2008 Sep;44(13):1799-806.
- 424 Vermani K; Garg S; Herbal medicines for sexually transmitted diseases and AIDS. *J Ethnopharmacol*. 2002 Apr;80(1):49-66.
- 425 Vértesy L; Ehlers E; Kogler H; Kurz M; Meiwes J; Seibert G; Vogel M; Hammann P; Friulimicins: novel lipopeptide antibiotics with peptidoglycan synthesis inhibiting activity from *Actinoplanes friuliensis* sp. nov. II. Isolation and structural characterization. *J Antibiot (Tokyo)*. 2000 Aug;53(8):816-27.
- 426 Vikhrova NM; Strukov IT; Tebyakina AE; Chaikovskaya SM; Shneerson AN; Dubova VG; Naphcillin and its microbiological study. *Fed Proc Transl Suppl*. 1965 Nov-Dec;24(6):1063-6.
- 427 Virk-Baker MK; Nagy TR; Barnes S; Role of phytoestrogens in cancer therapy. *Planta Med*. 2010 Aug;76(11):1132-42.

- 428 von Nussbaum F; Brands M; Hinzen B; Weigand S; Häbich D; Antibacterial natural products in medicinal chemistry--exodus or revival? *Angew Chem Int Ed Engl.* 2006 Aug 4;45(31):5072-129.
- 429 Wake G; Court J; Pickering A; Lewis R; Wilkins R; Perry E; CNS acetylcholine receptor activity in European medicinal plants traditionally used to improve failing memory. *J Ethnopharmacol.* 2000 Feb;69(2):105-14.
- 430 Wang FQ; Zhao Y; Dai M; Liu J; Zheng GZ; Ren ZH; He JG; Cloning and functional identification of C-4 methyl sterol oxidase genes from the penicillin-producing fungus *Penicillium chrysogenum*. *FEMS Microbiol Lett.* 2008 Oct;287(1):91-9.
- 431 Wang X; Jia W; Zhao A; Wang X; Anti-influenza agents from plants and traditional Chinese medicine. *Phytother Res.* 2006 May;20(5):335-41.
- 432 Wani MC; Taylor HL; Wall ME; Coggon P; McPhail AT; Plant antitumor agents. VI. The isolation and structure of taxol, a novel antileukemic and antitumor agent from *Taxus brevifolia*. *J Am Chem Soc.* 1971 May 5;93(9):2325-7.
- 433 Warkentin TE; Levine MN; Hirsh J; Horsewood P; Roberts RS; Gent M; Kelton JG; Heparin-induced thrombocytopenia in patients treated with low-molecular-weight heparin or unfractionated heparin. *N Engl J Med.* 1995 May 18;332(20):1330-5.
- 434 Way TD; Lee JC; Kuo DH; Fan LL; Huang CH; Lin HY; Shieh PC; Kuo PT; Liao CF; Liu H; Kao JY; Inhibition of epidermal growth factor receptor signaling by *Saussurea involucreata*, a rare traditional Chinese medicinal herb, in human hormone-resistant prostate cancer PC-3 cells. *J Agric Food Chem.* 2010 Mar 24;58(6):3356-65.
- 435 Weissman KJ; Müller R; Myxobacterial secondary metabolites: bioactivities and modes-of-action. *Nat Prod Rep.* 2010 Sep 18;27(9):1276-95.
- 436 Welsch ME; Snyder SA; Stockwell BR; Privileged scaffolds for library design and drug discovery. *Curr Opin Chem Biol.* 2010 Jun;14(3):347-61.
- 437 Wenzel SC; Müller R; Myxobacterial natural product assembly lines: fascinating examples of curious biochemistry. *Nat Prod Rep.* 2007 Dec;24(6):1211-24.
- 438 Wenzel SC; Müller R; The biosynthetic potential of myxobacteria and their impact in drug discovery. *Curr Opin Drug Discov Devel.* 2009 Mar;12(2):220-30.
- 439 Werz O; Inhibition of 5-lipoxygenase product synthesis by natural compounds of plant origin. *Planta Med.* 2007 Oct;73(13):1331-57.
- 440 West LM; Northcote PT; Battershill CN; Peloruside A: a potent cytotoxic macrolide isolated from the new zealand marine sponge *Mycale* sp. *J Org Chem.* 2000 Jan 28;65(2):445-9.
- 441 Wichmann K; Vaheri A; Luukkainen T; Inhibiting herpes simplex virus type 2 infection in human epithelial cells by gossypol, a potent spermicidal and contraceptive agent. *Am J Obstet Gynecol.* 1982 Mar 1;142(5):593-4.
- 442 Wietrzyk J; Gryniewicz G; Opolski A; Phytoestrogens in cancer prevention and therapy--mechanisms of their biological activity. *Anticancer Res.* 2005 May-Jun;25(3c):2357-66.
- 443 Williams P; Sorribas A; Howes MJ; Natural products as a source of Alzheimer's drug leads. *Nat Prod Rep.* 2011 Jan 17;28(1):48-77.
- 444 Wright CI; Van-Buren L; Kroner CI; Koning MM; Herbal medicines as diuretics: a review of the scientific evidence. *J Ethnopharmacol.* 2007 Oct 8;114(1):1-31.
- 445 Wright CW; Traditional antimalarials and the development of novel antimalarial drugs. *J Ethnopharmacol.* 2005 Aug 22;100(1-2):67-71.
- 446 Xu B; Jin Z; Wang H; Jin Q; Jin X; Cen P; Evolution of *Streptomyces pristinaespiralis* for resistance and production of pristinamycin by genome shuffling. *Appl Microbiol Biotechnol.* 2008 Aug;80(2):261-7.
- 447 Yang F; de Villiers WJ; McClain CJ; Varilek GW; Green tea polyphenols block endotoxin-induced tumor necrosis factor-production and lethality in a murine model. *J Nutr.* 1998 Dec;128(12):2334-40.
- 448 Yang HL; Chen CS; Chang WH; Lu FJ; Lai YC; Chen CC; Hseu TH; Kuo CT; Hseu YC; Growth inhibition and induction of apoptosis in MCF-7 breast cancer cells by *Antrodia camphorata*. *Cancer Lett.* 2006 Jan



- 
- 449 Yang SS; Cragg GM; Newman DJ; Bader JP; Natural product-based anti-HIV drug discovery and development facilitated by the NCI developmental therapeutics program. *J Nat Prod.* 2001 Feb;64(2):265-77.
- 
- 450 Yang SS; Ling MY; Tetracycline production with sweet potato residue by solid state fermentation. *Biotechnol Bioeng.* 1989 Mar;33(8):1021-8.
- 
- 451 Ye M; Li Y; Yan Y; Liu H; Ji X; Determination of flavonoids in Semen Cuscutae by RP-HPLC. *J Pharm Biomed Anal.* 2002 May 15;28(3-4):621-8.
- 
- 452 Ying Wang; Needs for new plant-derived pharmaceuticals in the post-genome era: an industrial view in drug research and development. *Phytochem Rev.* 2008;7:395-406
- 
- 453 Yoon TJ; Yoo YC; Lee SW; Shin KS; Choi WH; Hwang SH; Ha ES; Jo SK; Kim SH; Park WM; Anti-metastatic activity of *Acanthopanax senticosus* extract and its possible immunological mechanism of action. *J Ethnopharmacol.* 2004 Aug;93(2-3):247-53.
- 
- 454 Yoshikawa M; Matsui Y; Kawamoto H; Umemoto N; Oku K; Koizumi M; Yamao J; Kuriyama S; Nakano H; Hozumi N; Ishizaka S; Fukui H; Effects of glycyrrhizin on immune-mediated cytotoxicity. *J Gastroenterol Hepatol.* 1997 Mar;12(3):243-8.
- 
- 455 Yu D; Morris-Natschke SL; Lee KH; New developments in natural products-based anti-AIDS research. *Med Res Rev.* 2007 Jan;27(1):108-32.
- 
- 456 Yue QX; Liu X; Guo DA; Microtubule-binding natural products for cancer therapy. *Planta Med.* 2010 Aug;76(11):1037-43.
- 
- 457 Zampella A; Sepe V; Luciano P; Bellotta F; Monti MC; D'Auria MV; Jepsen T; Petek S; Adeline MT; Lapr ev te O; Aubertin AM; Debitus C; Poupat C; Ahond A; Homophymine A, an anti-HIV cyclodepsipeptide from the sponge *Homophymia* sp. *J Org Chem.* 2008 Jul 18;73(14):5319-27.
- 
- 458 Zhanel GG; Lam A; Schweizer F; Thomson K; Walkty A; Rubinstein E; Gin AS; Hoban DJ; Noreddin AM; Karlowsky JA; Ceftobiprole: a review of a broad-spectrum and anti-MRSA cephalosporin. *Am J Clin Dermatol.* 2008;9(4):245-54.
- 
- 459 Zhang MQ; Wilkinson B; Drug discovery beyond the 'rule-of-five'. *Curr Opin Biotechnol.* 2007 Dec;18(6):478-88.
- 
- 460 Zheng W; Wang SY; Antioxidant activity and phenolic compounds in selected herbs. *J Agric Food Chem.* 2001 Nov;49(11):5165-70.
- 
- 461 Zhou X; Gong Z; Su Y; Lin J; Tang K; Cordyceps fungi: natural products, pharmacological functions and developmental products. *J Pharm Pharmacol.* 2009 Mar;61(3):279-91.
-

**SI Appendix Table S9** Species family of nature-derived drugs of targets successfully explored since 1990. The profiles of kinase inhibitors and drugs approved in 2009-2010 are separately provided in **SI Appendix Table S1** and **SI Appendix Table S4**

| <b>Target (Year of First Successful Exploration)</b> | <b>Drug (Year of Approval)</b> | <b>Species Family as Existing Drug-Productive Family (Year of First Drug Approval)</b> | <b>Species Family as New Drug-Productive Family inside Existing Drug-Productive Cluster (Year of Cluster Appearance)</b> | <b>Species Family as New Drug-Productive Family outside Existing Drug-Productive Cluster</b> |
|------------------------------------------------------|--------------------------------|----------------------------------------------------------------------------------------|--------------------------------------------------------------------------------------------------------------------------|----------------------------------------------------------------------------------------------|
| Thrombin (1990)                                      | Argatroban (1990)              | Hominidae (1953)                                                                       |                                                                                                                          |                                                                                              |
|                                                      | Ximelagatran (2004)            | Hominidae (1953)                                                                       |                                                                                                                          |                                                                                              |
|                                                      | Lepirudin (1997)               |                                                                                        |                                                                                                                          | Glossiphoniidae, Hirudinidae                                                                 |
|                                                      | Bivalirudin (2000)             | Glossiphoniidae (1997), Hirudinidae (1997)                                             |                                                                                                                          |                                                                                              |
|                                                      | Desirudin (2003)               | Glossiphoniidae (1997), Hirudinidae (1997)                                             |                                                                                                                          |                                                                                              |
|                                                      | Hirulog (2000)                 | Glossiphoniidae (1997), Hirudinidae (1997)                                             |                                                                                                                          |                                                                                              |
| Maltase-glucoamylase (1990)                          | Acarbose (1990)                | Micromonosporaceae (1979)                                                              |                                                                                                                          |                                                                                              |
|                                                      | Voglibose (1994)               | Streptomycetaceae (1946)                                                               |                                                                                                                          |                                                                                              |
|                                                      | Miglitol (1998)                | Streptomycetaceae (1946)                                                               | Moraceae (before 1960)                                                                                                   | Thorectidae                                                                                  |
| 4-hydroxyphenylpyruvate dioxygenase (1991)           | Nitisinone (1991)              |                                                                                        | Myrtaceae (1980)                                                                                                         |                                                                                              |
| 5-alpha-reductase (1992)                             | Finasteride (1992)             | Hominidae (1953)                                                                       |                                                                                                                          |                                                                                              |
|                                                      | Dutasteride (2001)             | Hominidae (1953)                                                                       |                                                                                                                          |                                                                                              |
| Arachidonate 5-lipoxygenase (1992)                   | Masoprocol (1992)              | Zygophyllaceae (1978)                                                                  |                                                                                                                          |                                                                                              |
| Plasminogen (1992)                                   | Duteplase (1992)               | Hominidae (1953)                                                                       |                                                                                                                          |                                                                                              |
| Angiotensin receptor (1994)                          | Losartan (1994)                |                                                                                        |                                                                                                                          | Muridae                                                                                      |
|                                                      | Valsartan (1996)               | Muridae (1994)                                                                         |                                                                                                                          |                                                                                              |
|                                                      | Candesartan cilexetil (1997)   | Muridae (1994)                                                                         |                                                                                                                          |                                                                                              |
|                                                      | Eprosartan (1997)              | Muridae (1994)                                                                         |                                                                                                                          |                                                                                              |
|                                                      | Irbesartan (1997)              | Muridae (1994)                                                                         |                                                                                                                          |                                                                                              |
|                                                      | Olmesartan (2002)              | Muridae (1994)                                                                         |                                                                                                                          |                                                                                              |
|                                                      | Telmisartan (1999)             | Muridae (1994)                                                                         |                                                                                                                          |                                                                                              |

|                                                  |                                 |                                                             |                                |  |
|--------------------------------------------------|---------------------------------|-------------------------------------------------------------|--------------------------------|--|
| HIV-1 protease (1995)                            | Saquinavir (1995)               | Streptomyetaceae (1946)                                     | Actinomycetaceae (before 1960) |  |
|                                                  | Ritonavir (1996)                | Actinomycetaceae (1995), Streptomyetaceae (1946)            |                                |  |
|                                                  | Indinavir (1996)                | Actinomycetaceae (1995), Streptomyetaceae (1946)            |                                |  |
|                                                  | Neflinavir (1997)               | Actinomycetaceae (1995), Streptomyetaceae (1946)            |                                |  |
|                                                  | Amprenavir (1999)               | Actinomycetaceae (1995), Streptomyetaceae (1946)            |                                |  |
|                                                  | Atazanavir (2003)               | Actinomycetaceae (1995), Streptomyetaceae (1946)            |                                |  |
|                                                  | Lopinavir (2000)                | Actinomycetaceae (1995), Streptomyetaceae (1946)            |                                |  |
|                                                  | Fosamprenavir (2003)            | Actinomycetaceae (1995), Streptomyetaceae (1946)            |                                |  |
|                                                  | Darunavir (2006)                | Actinomycetaceae (1995), Streptomyetaceae (1946)            |                                |  |
| PGF receptor (1996)                              | Latanoprost (1996)              | Amaryllidaceae (1983), Asteraceae (1975), Sphingidae (1981) |                                |  |
|                                                  | Bimatoprost (2001)              | Amaryllidaceae (1983), Asteraceae (1975), Sphingidae (1981) |                                |  |
|                                                  | Travoprost (2001)               | Amaryllidaceae (1983), Asteraceae (1975), Sphingidae (1981) |                                |  |
| Histamine N-methyltransferase (1996)             | Amodiaquine (1996)              | Rubiaceae (1940)                                            |                                |  |
| Lipase (1998)                                    | Orlistat (1998)                 | Streptomyetaceae (1946)                                     |                                |  |
| Growth hormone-releasing hormone receptor (1998) | Sermorelin acetate (1998)       | Hominidae (1953)                                            |                                |  |
| ATP-sensitive potassium channel (1999)           | Nateglinide (1999)              | Hominidae (1953)                                            |                                |  |
| Myeloid cell surface antigen CD33 (2000)         | Gemtuzumab ozogamicin (2000)    | Micromonosporaceae (1979)                                   |                                |  |
| Atrial natriuretic peptide receptor (2001)       | Nesiritide (2001)               | Hominidae (1953)                                            |                                |  |
| Parathyroid hormone receptor (2002)              | Teriparatide (2002)             | Hominidae (1953)                                            |                                |  |
| Acetylcholinesterase (2002)                      | Galantamine hydrobromide (2002) | Amaryllidaceae (1983)                                       |                                |  |

|                                          |                              |                                                               |  |                |
|------------------------------------------|------------------------------|---------------------------------------------------------------|--|----------------|
| Proteasome (2003)                        | Bortezomib (2003)            | Hominidae (1953)                                              |  |                |
| Ceramide glucosyltransferase (2003)      | Miglustat (2003)             | Moraceae (1998), Streptomycetaceae (1946), Thorectidae (1998) |  |                |
| DNA methyltransferase (2004)             | Azacitidine (2004)           | Hominidae (1953)                                              |  |                |
|                                          | Decitabine (2004)            | Hominidae (1953)                                              |  |                |
| Substance-P receptor (2004)              | Vapreotide acetate (2004)    | Hominidae (1953)                                              |  |                |
| Voltage-dependent calcium channel (2004) | Pregabalin (2004)            | Hominidae (1953)                                              |  | Conidae        |
|                                          | Omega-conotoxin MVIIA (2005) | Hominidae (1953)                                              |  | Conidae        |
| Glucagon-like peptide 1 receptor (2005)  | Exenatide (2005)             |                                                               |  | Helodermatidae |
| HDAC (2006)                              | Vorinostat (2006)            | Neisseriaceae (1981), Streptomycetaceae (1946)                |  |                |
|                                          | Romidepsin (2009)            | Neisseriaceae (1981), Streptomycetaceae (1946)                |  |                |
| ClC-2 chloride channel (2006)            | Lubiprostone (2006)          | Amaryllidaceae (1983), Pinaceae (1955), Salicaceae (1898)     |  |                |
| CCR5 (2007)                              | Maraviroc (2007)             | Hominidae (1953)                                              |  |                |

**SI Appendix Table S10** Distribution of natural products identified from marine phyla in MarinLit and other review papers, together with the derived approved and clinical trial drugs

| Phylum                                                                                                 | Number of species | Number of identified natural products in MarinLit (Ref 1 below) and other review papers (Ref 2-8 below) | Number of approved and clinical trial drugs derived from phylum | Number of species with approved and clinical trial drugs |
|--------------------------------------------------------------------------------------------------------|-------------------|---------------------------------------------------------------------------------------------------------|-----------------------------------------------------------------|----------------------------------------------------------|
| <b>Phyla that have yielded approved drug</b>                                                           |                   |                                                                                                         |                                                                 |                                                          |
| Sponges                                                                                                | 836               | 6668                                                                                                    | 19                                                              | 14                                                       |
| Molluscs                                                                                               | 8708              | 1179                                                                                                    | 15                                                              | 9                                                        |
| Tunicates                                                                                              | 36091             | 977                                                                                                     | 152                                                             | 19                                                       |
| Annelida                                                                                               | 1929              | 49                                                                                                      | 2                                                               | 2                                                        |
| Ascomycota                                                                                             | 28831             | 48+89+141+38=316                                                                                        | 107                                                             | 40                                                       |
| Arthropoda                                                                                             | 59987             | 23                                                                                                      | 6                                                               | 1                                                        |
| Proteobacteria                                                                                         | 66740             | 3+22+21+70+25=141                                                                                       | 18                                                              | 11                                                       |
| <b>Phyla outside drug-productive cluster and without yielding an approved or a clinical trial drug</b> |                   |                                                                                                         |                                                                 |                                                          |
| Red algae                                                                                              | 2681              | 1548                                                                                                    | 0                                                               | 0                                                        |
| Brown algae                                                                                            | 748               | 1473                                                                                                    | 0                                                               | 0                                                        |
| Echinoderms                                                                                            | 808               | 1074                                                                                                    | 0                                                               | 0                                                        |
| Euglenozoa                                                                                             | 950               | 36                                                                                                      | 0                                                               | 0                                                        |
| Nematoda                                                                                               | 3271              | 2                                                                                                       | 0                                                               | 0                                                        |
| Bacteroidetes                                                                                          | 6465              | 4+29=33                                                                                                 | 0                                                               | 0                                                        |
| Labyrinthulomycota                                                                                     | 252               | 3                                                                                                       | 0                                                               | 0                                                        |
| Hemichordata                                                                                           | 32                | 26                                                                                                      | 0                                                               | 0                                                        |

**References for Supplementary Table S10**

1. Marine natural products. Blunt JW, Copp BR, Hu WP, Munro MH, Northcote PT, Prinsep MR. Nat Prod Rep. 2008 Feb;25(1):35-94.

2. Secondary metabolites from entomopathogenic Hypocrealean fungi. Molnár I, Gibson DM, Krasnoff SB. *Nat Prod Rep.* 2010 Sep 18;27(9):1241-75
3. Prenylated indole derivatives from fungi: structure diversity, biological activities, biosynthesis and chemoenzymatic synthesis. Li SM. *Nat Prod Rep.* 2010 Jan;27(1):57-78
4. Cordyceps fungi: natural products, pharmacological functions and developmental products. Zhou X, Gong Z, Su Y, Lin J, Tang K. *J Pharm Pharmacol.* 2009 Mar;61(3):279-91.
5. Entomopathogenic bacteria as a source of secondary metabolites. Bode HB. *Curr Opin Chem Biol.* 2009 Apr;13(2):224-30.
6. Myxobacterial natural product assembly lines: fascinating examples of curious biochemistry. Wenzel SC, Müller R. *Nat Prod Rep.* 2007 Dec;24(6):1211-24.
7. The chemistry of gliding bacteria. Nett M, König GM. *Nat Prod Rep.* 2007 Dec;24(6):1245-61.
8. The biosynthetic potential of myxobacteria and their impact in drug discovery. Wenzel SC, Müller R. *Curr Opin Drug Discov Devel.* 2009 Mar;12(2):220-30

**SI Appendix Table S11** Literature sources, statistics of collected data, and list of Species-families outside drug-productive clusters with multiple medicinal plants of well-studied bioactive compounds

| <b>Literature sources of medicinal plants with well-studied bioactive ingredients</b>                                                                                                                                                                                                                                                                  |                  |                          |                                                                |
|--------------------------------------------------------------------------------------------------------------------------------------------------------------------------------------------------------------------------------------------------------------------------------------------------------------------------------------------------------|------------------|--------------------------|----------------------------------------------------------------|
| <b>Source 1: Review papers</b>                                                                                                                                                                                                                                                                                                                         |                  |                          |                                                                |
| 1. Medicinal plants and cancer chemoprevention. Desai AG, Qazi GN, Ganju RK, El-Tamer M, Singh J, Saxena AK, Bedi YS, Taneja SC, Bhat HK. <i>Curr Drug Metab.</i> 2008 Sep;9(7):581-91.                                                                                                                                                                |                  |                          |                                                                |
| 2. Anti-inflammatory compounds of plant origin. Part II. modulation of pro-inflammatory cytokines, chemokine and adhesion molecules. Calixto JB, Campos MM, Otuki MF, Santos AR. <i>Planta Med.</i> 2004 Feb;70(2):93-100.                                                                                                                             |                  |                          |                                                                |
| 3. Plant-derived natural product research aimed at new drug discovery. Itokawa H, Morris-Natschke SL, Akiyama T, Lee KH. <i>J Nat Med.</i> 2008 Jul;62(3):263-80                                                                                                                                                                                       |                  |                          |                                                                |
| 4. New developments in natural products-based anti-AIDS research. Yu D, Morris-Natschke SL, Lee KH. <i>Med Res Rev.</i> 2007 Jan;27(1):108-32                                                                                                                                                                                                          |                  |                          |                                                                |
| 5. Novel antiviral agents: a medicinal plant perspective. Jassim SA, Naji MA. <i>J Appl Microbiol.</i> 2003;95(3):412-418                                                                                                                                                                                                                              |                  |                          |                                                                |
| 6. Antiviral activity of phytochemicals: a comprehensive review. Naithani R, Huma LC, Holland LE, Shukla D, McCormick DL, Mehta RG, Moriarty RM. <i>Mini Rev Med Chem.</i> 2008 Oct;8(11):1106-33                                                                                                                                                      |                  |                          |                                                                |
| 7. Botanical immunodrugs: scope and opportunities. Patwardhan B, Gautam M. <i>Drug Discov Today.</i> 2005 Apr 1;10(7):495-502                                                                                                                                                                                                                          |                  |                          |                                                                |
| 8. Naturally occurring antinociceptive substances from plants. Calixto JB, Beirith A, Ferreira J, Santos AR, Filho VC, Yunus RA. <i>Phytother Res.</i> 2000 Sep;14(6):401-18                                                                                                                                                                           |                  |                          |                                                                |
| <b>Source 2: Databases</b>                                                                                                                                                                                                                                                                                                                             |                  |                          |                                                                |
| 1. Traditional Chinese Medicine Information DataBase <a href="http://bidd.nus.edu.sg/group/TCMsite/Default.aspx">http://bidd.nus.edu.sg/group/TCMsite/Default.aspx</a> (TCM-ID: Traditional Chinese Medicine information database. J. F. Wang, H. Zhou, L. Y. Han, Z.W. Cao, X. Chen and Y. Z. Chen, <i>Clin. Pharmacol. Ther.</i> 78(1):92-93 (2005)) |                  |                          |                                                                |
| 2. HIT database (HIT: linking herbal active ingredients to targets. H. Ye, L. Ye, H. Kang, D.F. Zhang, L. Tao, K. Tang, X.P. Liu X, R.X. Zhu, Q. Liu, Y.Z. Chen, Y.X. Li and Z.W. Cao. <i>Nucleic Acids Res.</i> 39 (suppl_1): D1059-D1064 (2011) )                                                                                                    |                  |                          |                                                                |
| <b>Source 3: Books</b>                                                                                                                                                                                                                                                                                                                                 |                  |                          |                                                                |
| 1. Handbook of composition and pharmacological action of commonly-used traditional Chinese medicine, Volume 1, Ed Huang Tai Kang, China Medical Science Press 1994, ISBN 7-5067-0769-1 R-0684                                                                                                                                                          |                  |                          |                                                                |
| 2. Handbook of composition and pharmacological action of commonly-used traditional Chinese medicine, Volume 2, Ed Huang Tai Kang, China Medical Science Press 1994, ISBN 7-5067-0769-1 R-0684                                                                                                                                                          |                  |                          |                                                                |
| <b>Statistics of collected data:</b>                                                                                                                                                                                                                                                                                                                   |                  |                          |                                                                |
| 767 species of medicinal plants with more than one well-studied bioactive ingredient and from more than one source. These medicinal plants are from 172 families in 79 orders                                                                                                                                                                          |                  |                          |                                                                |
| <b>Species-families outside drug-productive clusters with multiple medicinal plants</b>                                                                                                                                                                                                                                                                |                  |                          |                                                                |
| <b>Family</b>                                                                                                                                                                                                                                                                                                                                          | <b>Order</b>     | <b>Number of species</b> | <b>Number of species with well-studied bioactive compounds</b> |
| Polygonaceae                                                                                                                                                                                                                                                                                                                                           | Caryophyllales   | 434                      | 27                                                             |
| Araceae                                                                                                                                                                                                                                                                                                                                                | Alismatales      | 639                      | 10                                                             |
| Caryophyllaceae                                                                                                                                                                                                                                                                                                                                        | Caryophyllales   | 638                      | 10                                                             |
| Schisandraceae                                                                                                                                                                                                                                                                                                                                         | Austrobaileyales | 49                       | 10                                                             |

|                  |                |      |    |
|------------------|----------------|------|----|
| Amaranthaceae    | Caryophyllales | 804  | 10 |
| Liliaceae        | Liliales       | 393  | 9  |
| Primulaceae      | Ericales       | 642  | 8  |
| Xanthorrhoeaceae | Asparagales    | 226  | 7  |
| Vitaceae         | Vitales        | 212  | 7  |
| Santalaceae      | Santalales     | 263  | 6  |
| Dioscoreaceae    | Dioscoreales   | 132  | 6  |
| Orchidaceae      | Asparagales    | 4846 | 6  |
| Paeoniaceae      | Saxifragales   | 47   | 5  |
| Chloranthaceae   | Chloranthales  | 35   | 5  |
| Polypodiaceae    | Polypodiales   | 410  | 5  |
| Smilacaceae      | Liliales       | 24   | 4  |
| Ericaceae        | Ericales       | 1059 | 4  |
| Iridaceae        | Asparagales    | 463  | 3  |
| Hamamelidaceae   | Saxifragales   | 62   | 3  |
| Dryopteridaceae  | Polypodiales   | 506  | 3  |
| Acoraceae        | Acorales       | 8    | 3  |
| Actinidiaceae    | Ericales       | 49   | 3  |



**SI Appendix Table S12** Distribution of natural products and nature-derived drugs in species-families. The number of searchable bioactive compounds is based on the information we were able to collect from natural product databases and literatures, which also include natural product leads of approved, clinical trial and preclinical drugs

| Species Family                                                            | Number of Species | Number of Approved and Clinical Trial Drugs | Number of Approved Drugs | Number of Clinical Trial Drugs | Number of Searchable Known Bioactive Compounds | Earliest Year of Reported Studies |
|---------------------------------------------------------------------------|-------------------|---------------------------------------------|--------------------------|--------------------------------|------------------------------------------------|-----------------------------------|
| <b>Drug-productive family that have yielded approved drugs</b>            |                   |                                             |                          |                                |                                                |                                   |
| Hominidae                                                                 | 16                | 369                                         | 343                      | 26                             | 270                                            | -                                 |
| Streptomycetaceae                                                         | 7556              | 193                                         | 147                      | 46                             | 340                                            | 1943                              |
| Pseudonocardiaceae                                                        | 747               | 89                                          | 76                       | 13                             | 24                                             | 1979                              |
| Acremonium                                                                | 57                | 54                                          | 49                       | 5                              | 9                                              | 1948                              |
| Emericellopsis                                                            | 16                | 52                                          | 47                       | 5                              | 3                                              | -                                 |
| Trichocomaceae                                                            | 1900              | 48                                          | 45                       | 3                              | 402                                            | 1939                              |
| Fabaceae                                                                  | 5882              | 44                                          | 36                       | 8                              | 968                                            | 1532                              |
| Rubiaceae                                                                 | 2524              | 32                                          | 15                       | 17                             | 218                                            | 1696                              |
| Brassicaceae                                                              | 1999              | 27                                          | 2                        | 25                             | 181                                            | 1577                              |
| Asteraceae                                                                | 7229              | 25                                          | 17                       | 8                              | 1016                                           | 1532                              |
| Papaveraceae                                                              | 215               | 22                                          | 19                       | 3                              | 96                                             | 1687                              |
| Cornaceae                                                                 | 104               | 22                                          | 6                        | 16                             | 60                                             | 1926                              |
| Viperidae                                                                 | 288               | 21                                          | 18                       | 3                              | 7                                              | 1965                              |
| Icacinaceae                                                               | 27                | 21                                          | 5                        | 16                             | 2                                              | 1977                              |
| Apocynaceae                                                               | 1401              | 20                                          | 14                       | 6                              | 260                                            | 1928                              |
| Ephedraceae                                                               | 72                | 19                                          | 19                       | 0                              | 51                                             | 1923                              |
| Muridae                                                                   | 532               | 19                                          | 19                       | 0                              | 14                                             | -                                 |
| Solanaceae                                                                | 1223              | 18                                          | 15                       | 3                              | 130                                            | 1959                              |
| Taxaceae                                                                  | 26                | 17                                          | 4                        | 13                             | 12                                             | 1971                              |
| Herpesviridae                                                             | 480               | 15                                          | 15                       | 0                              | 12                                             | -                                 |
| <b>Drug-productive family that have yielded only clinical trial drugs</b> |                   |                                             |                          |                                |                                                |                                   |
| Aplysiidae                                                                | 33                | 5                                           | 0                        | 5                              | 106                                            | 2001                              |
| Combretaceae                                                              | 106               | 5                                           | 0                        | 5                              | 94                                             | 1941                              |
| Bugulidae                                                                 | 12                | 5                                           | 0                        | 5                              | 25                                             | 1982                              |

|                                                                     |      |   |   |   |     |      |
|---------------------------------------------------------------------|------|---|---|---|-----|------|
| Anomodontaceae                                                      | 15   | 5 | 0 | 5 | 1   | -    |
| Leskeaceae                                                          | 38   | 5 | 0 | 5 | 1   | -    |
| Petrosiidae                                                         | 17   | 4 | 0 | 4 | 154 | 1979 |
| Symploca                                                            | 14   | 4 | 0 | 4 | 19  | 2001 |
| Dendrobatidae                                                       | 168  | 4 | 0 | 4 | 5   | 1974 |
| Flaviviridae                                                        | 645  | 4 | 0 | 4 | 4   | -    |
| Quillajaceae                                                        | 1    | 3 | 0 | 3 | 8   | 1979 |
| Squalidae                                                           | 20   | 3 | 0 | 3 | 2   | 1979 |
| Axinellidae                                                         | 50   | 2 | 0 | 2 | 149 | 1992 |
| Ancorinidae                                                         | 6    | 2 | 0 | 2 | 121 | 2001 |
| <b>None drug-productive family inside drug-productive clusters</b>  |      |   |   |   |     |      |
| Araliaceae                                                          | 486  | 0 | 0 | 0 | 315 | 1957 |
| Caprifoliaceae                                                      | 366  | 0 | 0 | 0 | 291 | 1543 |
| Saururaceae                                                         | 6    | 0 | 0 | 0 | 192 | 1999 |
| Plakinidae                                                          | 13   | 0 | 0 | 0 | 144 | 1995 |
| Orchidaceae                                                         | 4846 | 0 | 0 | 0 | 129 | 1543 |
| Aristolochiaceae                                                    | 200  | 0 | 0 | 0 | 122 | 1577 |
| Spongiidae                                                          | 8    | 0 | 0 | 0 | 109 | 1979 |
| Irciniidae                                                          | 5    | 0 | 0 | 0 | 105 | 1972 |
| Phyllanthaceae                                                      | 373  | 0 | 0 | 0 | 101 | 1937 |
| Chalinidae                                                          | 31   | 0 | 0 | 0 | 93  | 1982 |
| <b>None drug-productive family outside drug-productive clusters</b> |      |   |   |   |     |      |
| Alcyoniidae                                                         | 175  | 0 | 0 | 0 | 368 | 1994 |
| Rhodomelaceae                                                       | 253  | 0 | 0 | 0 | 294 | 1961 |
| Nephtheidae                                                         | 42   | 0 | 0 | 0 | 207 | 1987 |
| Polygonaceae                                                        | 434  | 0 | 0 | 0 | 177 | 1577 |
| Schisandraceae                                                      | 49   | 0 | 0 | 0 | 161 | 1979 |
| Briareidae                                                          | 1    | 0 | 0 | 0 | 155 | 2001 |
| Clavulariidae                                                       | 16   | 0 | 0 | 0 | 150 | 1987 |
| Sargassaceae                                                        | 129  | 0 | 0 | 0 | 131 | 1998 |
| Xeniidae                                                            | 17   | 0 | 0 | 0 | 126 | 2002 |
| Caryophyllaceae                                                     | 638  | 0 | 0 | 0 | 124 | 1560 |
| Stemonaceae                                                         | 20   | 0 | 0 | 0 | 115 | 1991 |
| Primulaceae                                                         | 642  | 0 | 0 | 0 | 102 | 1962 |
| Plexauridae                                                         | 91   | 0 | 0 | 0 | 99  | 1999 |

|                 |     |   |   |   |    |      |
|-----------------|-----|---|---|---|----|------|
| Crassulaceae    | 501 | 0 | 0 | 0 | 96 | 1857 |
| Corioliaceae    | 427 | 0 | 0 | 0 | 91 | 1577 |
| Ellisellidae    | 10  | 0 | 0 | 0 | 89 | 2000 |
| Lymnaeidae      | 221 | 0 | 0 | 0 | 86 | -    |
| Ganodermataceae | 181 | 0 | 0 | 0 | 85 | 1985 |
| Santalaceae     | 263 | 0 | 0 | 0 | 85 | 1958 |
| Amaranthaceae   | 804 | 6 | 6 | 0 | 83 | 1888 |

**SI Appendix Table S13** List of literatures used in this work for finding the species origins of the novel secondary metabolites published in 2001-2011

|    |                                                                                                                                                                                                                                                                                                  |
|----|--------------------------------------------------------------------------------------------------------------------------------------------------------------------------------------------------------------------------------------------------------------------------------------------------|
| 1  | A gene cluster containing two fungal polyketide synthases encodes the biosynthetic pathway for a polyketide, asperfuranone, in <i>Aspergillus nidulans</i> . <i>J Am Chem Soc.</i> 2009 Mar 4;131(8):2965-70.                                                                                    |
| 2  | A Highly Conjugated Dihydroxylated C(28) Steroid from a Myxobacterium. <i>J Nat Prod.</i> 2011 Apr 22.                                                                                                                                                                                           |
| 3  | A new bianthrane C-arabinopyranoside from <i>Senna septemtrionalis</i> . <i>Nat Prod Commun.</i> 2010 May;5(5):747-50.                                                                                                                                                                           |
| 4  | A new type of tripropeptin with anteiso-branched chain fatty acid from <i>Lysobacter</i> sp. BMK333-48F3. <i>J Antibiot (Tokyo).</i> 2008 Sep;61(9):577-82.                                                                                                                                      |
| 5  | A novel adriamycin analogue derived from marine microbes induces apoptosis by blocking Akt activation in human breast cancer cells. <i>Mol Med Report.</i> 2011 Mar;4(2):261-5.                                                                                                                  |
| 6  | A novel polyamine acyltransferase responsible for the accumulation of spermidine conjugates in <i>Arabidopsis</i> seed. <i>Plant Cell.</i> 2009 Jan;21(1):318-33.                                                                                                                                |
| 7  | A peptidomic approach for monitoring and characterising peptide cyanotoxins produced in Italian lakes by matrix-assisted laser desorption/ionisation and quadrupole time-of-flight mass spectrometry. <i>Rapid Commun Mass Spectrom.</i> 2011 May 15;25(9):1173-83.                              |
| 8  | A polyhedral approach for understanding flavonoid biosynthesis in <i>Arabidopsis</i> . <i>N Biotechnol.</i> 2010 Dec 31;27(6):829-36.                                                                                                                                                            |
| 9  | Activation of Dormant Secondary Metabolism Neotrehalosidamine Synthesis by an RNA Polymerase Mutation in <i>Bacillus subtilis</i> . <i>Biosci Biotechnol Biochem.</i> 2011 Apr 22.                                                                                                               |
| 10 | Analysis of transcripts in methyl jasmonate-treated ginseng hairy roots to identify genes involved in the biosynthesis of ginsenosides and other secondary metabolites. <i>Plant Cell Rep.</i> 2005 Jan;23(8):557-66.                                                                            |
| 11 | Antiesophageal cancer activity from Southern African marine organisms. <i>Ann N Y Acad Sci.</i> 2005 Nov;1056:405-12.                                                                                                                                                                            |
| 12 | Antifungal and cytotoxic activities of the secondary metabolites from endophytic fungus <i>Massrisson</i> sp. <i>Phytomedicine.</i> 2011 Mar 4.                                                                                                                                                  |
| 13 | Anti-leukemic activities of <i>Dictyostelium</i> secondary metabolites: a novel aromatic metabolite, 4-methyl-5-n-pentylbenzene-1,3-diol, isolated from <i>Dictyostelium mucoroides</i> suppresses cell growth in human leukemia K562 and HL-60 cells. <i>Life Sci.</i> 2006 Dec 14;80(2):160-5. |
| 14 | Antisense-guided isolation and structure elucidation of pannomycin, a substituted cis-decalin from <i>Geomyces pannorum</i> . <i>J Nat Prod.</i> 2009 Jan;72(1):59-62.                                                                                                                           |
| 15 | Aqabamycins A-G: novel nitro maleimides from a marine <i>Vibrio</i> species. I. Taxonomy, fermentation, isolation and biological activities. <i>J Antibiot (Tokyo).</i> 2010 Jun;63(6):297-301.                                                                                                  |
| 16 | Ascomycones A-C, Heptaketide Metabolites from an Unidentified Ascomycete. <i>J Nat Prod.</i> 2008 Nov 7.                                                                                                                                                                                         |
| 17 | Beta-sitosterol among other secondary metabolites of <i>Piper galeatum</i> shows inhibition of TNF $\alpha$ -induced cell adhesion molecule expression on human endothelial cells. <i>Biochimie.</i> 2010 Sep;92(9):1213-21.                                                                     |
| 18 | Bioactive compounds from <i>Bauhinia purpurea</i> possessing antimalarial, antimycobacterial, antifungal, anti-inflammatory, and cytotoxic activities. <i>J Nat Prod.</i> 2007 May;70(5):795-801.                                                                                                |
| 19 | Bioactive lipopeptides of ice-nucleating snow bacterium <i>Pseudomonas syringae</i> strain 31R1. <i>FEMS Microbiol Lett.</i> 2008 Sep;286(2):158-65.                                                                                                                                             |
| 20 | Bioactive xanthenes from the roots of <i>Hypericum perforatum</i> (common St John's wort). <i>J Sci Food Agric.</i> 2011 Feb;91(3):428-34.                                                                                                                                                       |
| 21 | Bioactivity, Chemical Profiling, and 16S rRNA-Based Phylogeny of <i>Pseudoalteromonas</i> Strains Collected on a Global Research Cruise. <i>Mar Biotechnol (NY).</i> 2011 Feb 9.                                                                                                                 |
| 22 | Biochemical characterization of a novel indole prenyltransferase from <i>Streptomyces</i> sp. SN-593. <i>J Bacteriol.</i> 2010 Jun;192(11):2839-51.                                                                                                                                              |
| 23 | Biological activity of secondary metabolites from <i>Peltostigma guatemalense</i> . <i>Nat Prod Res.</i>                                                                                                                                                                                         |

|    |                                                                                                                                                                                                                                                                                           |
|----|-------------------------------------------------------------------------------------------------------------------------------------------------------------------------------------------------------------------------------------------------------------------------------------------|
|    | 2009;23(4):370-4.                                                                                                                                                                                                                                                                         |
| 24 | Biosynthesis of tripyrrole and beta-lactam secondary metabolites in <i>Serratia</i> : integration of quorum sensing with multiple new regulatory components in the control of prodigiosin and carbapenem antibiotic production. <i>Mol Microbiol.</i> 2005 Jun;56(6):1495-517.            |
| 25 | Biosynthetic gene-based secondary metabolite screening: a new diterpene, methyl phomopsenonate, from the fungus <i>Phomopsis amygdali</i> . <i>J Org Chem.</i> 2009 Feb 20;74(4):1541-8.                                                                                                  |
| 26 | Caucanolides A-F, unusual antiplasmodial constituents from a colombian collection of the gorgonian coral <i>Pseudopterogorgia bipinnata</i> . <i>J Nat Prod.</i> 2005 Oct;68(10):1519-26.                                                                                                 |
| 27 | Chemical analyses of wasp-associated streptomyces bacteria reveal a prolific potential for natural products discovery. <i>PLoS One.</i> 2011 Feb 22;6(2):e16763.                                                                                                                          |
| 28 | Chemical profiling of lentil ( <i>Lens culinaris</i> Medik.) Cultivars and isolation of compounds. <i>J Agric Food Chem.</i> 2010 Aug 11;58(15):8715-21.                                                                                                                                  |
| 29 | Chloropupukeanolides C-E: cytotoxic pupukeanane chlorides with a spiroketal skeleton from <i>Pestalotiopsis fici</i> . <i>Chemistry.</i> 2011 Feb 25;17(9):2604-13. doi: 10.1002/chem.201003129.                                                                                          |
| 30 | Cloning and biochemical characterization of the hectochlorin biosynthetic gene cluster from the marine cyanobacterium <i>Lyngbya majuscula</i> . <i>J Nat Prod.</i> 2007 Dec;70(12):1977-86.                                                                                              |
| 31 | De novo transcriptome sequencing in <i>Salvia miltiorrhiza</i> to identify genes involved in the biosynthesis of active ingredients. <i>Genomics.</i> 2011 Apr 5.                                                                                                                         |
| 32 | Deletion of a regulatory gene within the cpk gene cluster reveals novel antibacterial activity in <i>Streptomyces coelicolor</i> A3(2). <i>Microbiology.</i> 2010 Aug;156(Pt 8):2343-53.                                                                                                  |
| 33 | Development of a novel system for producing ajmalicine and serpentine using direct culture of leaves in <i>Catharanthus roseus</i> intact plant. <i>J Biosci Bioeng.</i> 2005 Mar;99(3):208-15.                                                                                           |
| 34 | Discovery and development of the epothilones : a novel class of antineoplastic drugs. <i>Drugs R D.</i> 2008;9(1):1-10.                                                                                                                                                                   |
| 35 | Discovery of novel metabolites from marine actinomycetes. <i>Curr Opin Microbiol.</i> 2006 Jun;9(3):245-51.                                                                                                                                                                               |
| 36 | Discovery of platencin, a dual FabF and FabH inhibitor with in vivo antibiotic properties. <i>Proc Natl Acad Sci U S A.</i> 2007 May 1;104(18):7612-6.                                                                                                                                    |
| 37 | Distribution of the 3-hydroxyl-3-methylglutaryl coenzyme A reductase gene and isoprenoid production in marine-derived Actinobacteria. <i>FEMS Microbiol Lett.</i> 2010 Mar;304(1):89-96.                                                                                                  |
| 38 | Ecological leads for natural product discovery: Novel sesquiterpene hydroquinones from the red macroalga <i>Peyssonnelia</i> sp. <i>Tetrahedron.</i> 2010 Jan 9;66(2):455-461.                                                                                                            |
| 39 | Enhanced secondary metabolite (tanshinone) production of <i>Salvia miltiorrhiza</i> hairy roots in a novel root-bacteria coculture process. <i>Appl Microbiol Biotechnol.</i> 2007 Dec;77(3):543-50.                                                                                      |
| 40 | Erythrochelin--a hydroxamate-type siderophore predicted from the genome of <i>Saccharopolyspora erythraea</i> . <i>FEBS J.</i> 2010 Feb;277(3):663-76.                                                                                                                                    |
| 41 | <i>Escherichia coli</i> allows efficient modular incorporation of newly isolated quinomycin biosynthetic enzyme into echinomycin biosynthetic pathway for rational design and synthesis of potent antibiotic unnatural natural product. <i>J Am Chem Soc.</i> 2009 Jul 8;131(26):9347-53. |
| 42 | Fascinating metabolic pools of <i>Pelargonium sidoides</i> and <i>Pelargonium reniforme</i> , traditional and phytomedicinal sources of the herbal medicine Umckaloabo. <i>Phytomedicine.</i> 2007;14 Suppl 6:9-17.                                                                       |
| 43 | Fungal secondary metabolites - strategies to activate silent gene clusters. <i>Fungal Genet Biol.</i> 2011 Jan;48(1):15-22.                                                                                                                                                               |
| 44 | Fungal tyrosine betaine, a novel secondary metabolite from conidia of entomopathogenic <i>Metarhizium</i> spp. fungi. <i>Fungal Biol.</i> 2010 May-Jun;114(5-6):473-80.                                                                                                                   |
| 45 | Genome sequence of a phototrophic betaproteobacterium, <i>Rubrivivax benzoatilyticus</i> Strain JA2T. <i>J Bacteriol.</i> 2011 Apr 8.                                                                                                                                                     |
| 46 | Genomic analyses lead to novel secondary metabolites. Part 3. ECO-0501, a novel antibacterial of a new class. <i>J Antibiot (Tokyo).</i> 2006 Sep;59(9):533-42.                                                                                                                           |
| 47 | Gram-Positive Marine Bacteria as a Potential Resource for the Discovery of Quorum Sensing Inhibitors. <i>Mar Biotechnol (NY).</i> 2010 Dec 9.                                                                                                                                             |

|    |                                                                                                                                                                                                                                                                                   |
|----|-----------------------------------------------------------------------------------------------------------------------------------------------------------------------------------------------------------------------------------------------------------------------------------|
| 48 | Heptemerones A-G, seven novel diterpenoids from <i>Coprinus heptemerus</i> : producing organism, fermentation, isolation and biological activities. <i>J Antibiot (Tokyo)</i> . 2005 Jun;58(6):390-6.                                                                             |
| 49 | Heterologous production of ribostamycin derivatives in engineered <i>Escherichia coli</i> . <i>Res Microbiol</i> . 2010 Sep;161(7):526-33.                                                                                                                                        |
| 50 | Highly efficient strategy for enhancing taxoid production by repeated elicitation with a newly synthesized jasmonate in fed-batch cultivation of <i>Taxus chinensis</i> cells. <i>Biotechnol Bioeng</i> . 2005 May 20;90(4):516-21.                                               |
| 51 | Host-derived media used as a predictor for low abundant, in planta metabolite production from necrotrophic fungi. <i>J Appl Microbiol</i> . 2006 Dec;101(6):1292-300.                                                                                                             |
| 52 | Identification of a bioactive 51-membered macrolide complex by activation of a silent polyketide synthase in <i>Streptomyces ambofaciens</i> . <i>Proc Natl Acad Sci U S A</i> . 2011 Apr 12;108(15):6258-63.                                                                     |
| 53 | Identification of a quinazoline alkaloid produced by <i>Penicillium vinaceum</i> , an endophytic fungus from <i>Crocus sativus</i> . <i>Pharm Biol</i> . 2011 Apr 26.                                                                                                             |
| 54 | Identification of major and minor constituents of <i>Harpagophytum procumbens</i> (Devil's claw) using HPLC-SPE-NMR and HPLC-ESIMS/APCIMS. <i>J Nat Prod</i> . 2006 Sep;69(9):1280-8.                                                                                             |
| 55 | Identified biosynthetic pathway of aspergiolide A and a novel strategy to increase its production in a marine-derived fungus <i>Aspergillus glaucus</i> by feeding of biosynthetic precursors and inhibitors simultaneously. <i>Bioresour Technol</i> . 2009 Sep;100(18):4244-51. |
| 56 | Improvement of spinosad production by overexpression of <i>ggt</i> and <i>gdh</i> controlled by promoter <i>PerME*</i> in <i>Saccharopolyspora spinosa</i> SIPI-A2090. <i>Biotechnol Lett</i> . 2011 Apr;33(4):733-9.                                                             |
| 57 | Insights into the complex biosynthesis of the leupyrrins in <i>Sorangium cellulosum</i> So ce690. <i>Mol Biosyst</i> . 2011 May 1;7(5):1549-63.                                                                                                                                   |
| 58 | Intricarene, an unprecedented trispiropentacyclic diterpene from the Caribbean Sea plume <i>Pseudopterogorgia kallos</i> . <i>Org Lett</i> . 2005 Apr 28;7(9):1877-80.                                                                                                            |
| 59 | Isolation and structural determination of xerophytolic acid A, a 3-geranyl-4-hydroxybenzoate derivative from <i>Xerophyta plicata</i> . <i>Nat Prod Res</i> . 2006 Nov;20(13):1225-30.                                                                                            |
| 60 | Isolation and synthesis of a new aromatic compound, brefelamide, from dictyostelium cellular slime molds and its inhibitory effect on the proliferation of astrocytoma cells. <i>J Org Chem</i> . 2005 Oct 28;70(22):8854-8.                                                      |
| 61 | Isolation of heptadepsin, a novel bacterial cyclic depsipeptide that inhibits lipopolysaccharide activity. <i>Chem Biol</i> . 2004 Aug;11(8):1059-70.                                                                                                                             |
| 62 | Isolation of the biosynthetic gene cluster for tautomycin, a linear polyketide T cell-specific immunomodulator from <i>Streptomyces</i> sp. CK4412. <i>Microbiology</i> . 2007 Apr;153(Pt 4):1095-102.                                                                            |
| 63 | Isolation, structure, and functional elucidation of a modified pentapeptide, cysteine protease inhibitor (CPI-2081) from <i>Streptomyces</i> species 2081 that exhibit inhibitory effect on cancer cell migration. <i>J Med Chem</i> . 2010 Jul 22;53(14):5121-8.                 |
| 64 | JBIR-37 and -38, novel glycosyl benzenediols, isolated from the sponge-derived fungus, <i>Acremonium</i> sp. SpF080624G1f01. <i>Biosci Biotechnol Biochem</i> . 2009 Sep;73(9):2138-40.                                                                                           |
| 65 | Karnatakafurans A and B: two dibenzofurans isolated from the Fungus <i>Aspergillus karnatakaensis</i> . <i>J Nat Prod</i> . 2004 Dec;67(12):2111-2.                                                                                                                               |
| 66 | Koniamborine, the first pyrano[3,2-b]indole alkaloid and other secondary metabolites from <i>Boronella koniambiensis</i> . <i>J Nat Prod</i> . 2005 Jul;68(7):1083-6.                                                                                                             |
| 67 | LC-MS analysis of solanidane glycoalkaloid diversity among tubers of four wild potato species and three cultivars ( <i>Solanum tuberosum</i> ). <i>J Agric Food Chem</i> . 2008 Aug 27;56(16):6949-58.                                                                            |
| 68 | Limnophilaspiroketone, a highly oxygenated phenolic derivative from <i>Limnophila geoffrayi</i> . <i>J Nat Prod</i> . 2005 Jul;68(7):1134-6.                                                                                                                                      |
| 69 | Marine actinomycetes as a source of novel secondary metabolites. <i>Antonie Van Leeuwenhoek</i> . 2005 Jan;87(1):37-42.                                                                                                                                                           |
| 70 | Marine natural products of fungal origin. <i>Nat Prod Rep</i> . 2007 Oct;24(5):1142-52.                                                                                                                                                                                           |
| 71 | Metabolic diversification of benzylisoquinoline alkaloid biosynthesis through the introduction of a branch pathway in <i>Eschscholzia californica</i> . <i>Plant Cell Physiol</i> . 2010 Jun;51(6):949-59.                                                                        |

|    |                                                                                                                                                                                                                                                                |
|----|----------------------------------------------------------------------------------------------------------------------------------------------------------------------------------------------------------------------------------------------------------------|
| 72 | Mexican medicinal plants used for cancer treatment: pharmacological, phytochemical and ethnobotanical studies. <i>J Ethnopharmacol.</i> 2011 Feb 16;133(3):945-72.                                                                                             |
| 73 | Molecular and biochemical detection of fengycin- and bacillomycin D-producing <i>Bacillus</i> spp., antagonistic to fungal pathogens of canola and wheat. <i>Can J Microbiol.</i> 2007 Jul;53(7):901-11.                                                       |
| 74 | Molecular phylogeny of the Pertusariaceae supports secondary chemistry as an important systematic character set in lichen-forming ascomycetes. <i>Mol Phylogenet Evol.</i> 2004 Oct;33(1):43-55.                                                               |
| 75 | Natural products isolated from species of <i>Halgerda</i> bergh, 1880 (Mollusca: Nudibranchia) and their ecological and evolutionary implications. <i>J Chem Ecol.</i> 2007 Jun;33(6):1226-34.                                                                 |
| 76 | Nematicidal resorcylics from the aquatic fungus <i>Caryospora callicarpa</i> YMF1.01026. <i>J Chem Ecol.</i> 2007 May;33(5):1115-26.                                                                                                                           |
| 77 | New natural products from the sponge-derived fungus <i>Aspergillus niger</i> . <i>J Nat Prod.</i> 2004 Sep;67(9):1532-43.                                                                                                                                      |
| 78 | Norleucine, a natural occurrence in a novel ergot alkaloid gamma-ergokryptinine. <i>Amino Acids.</i> 2005 Aug;29(2):145-50.                                                                                                                                    |
| 79 | Novel acylkaempferol glycoside from the endemic species, <i>Vernonia travancorica</i> Hook. f. <i>J Asian Nat Prod Res.</i> 2004 Dec;6(4):295-9.                                                                                                               |
| 80 | Novel analgesic triglycerides from cultures of <i>Agaricus macrosporus</i> and other basidiomycetes as selective inhibitors of neurolysin. <i>J Antibiot (Tokyo).</i> 2005 Dec;58(12):775-86.                                                                  |
| 81 | Novel macrolide from wild strains of the phytopathogen Fungus <i>Colletotrichum acutatum</i> . <i>Nat Prod Commun.</i> 2009 Mar;4(3):395-8.                                                                                                                    |
| 82 | Novel secondary metabolites, spiroisorbicillinols a, B, and C, from a fungus. <i>Biosci Biotechnol Biochem.</i> 2009 Jun;73(6):1355-61.                                                                                                                        |
| 83 | Occurrence and characterization of peptaibols from <i>Trichoderma citrinoviride</i> , an endophytic fungus of cork oak, using electrospray ionization quadrupole time-of-flight mass spectrometry. <i>Microbiology.</i> 2009 Oct;155(Pt 10):3371-81.           |
| 84 | Oxachelin, a novel iron chelator and antifungal agent from <i>Streptomyces</i> sp. GW9/1258. <i>J Antibiot (Tokyo).</i> 2006 Oct;59(10):659-63.                                                                                                                |
| 85 | Pachyelasides A-D, novel molluscicidal triterpene saponins from <i>Pachyelasma tessmannii</i> . <i>J Agric Food Chem.</i> 2005 Feb 9;53(3):608-13.                                                                                                             |
| 86 | Paerucumarin, a new metabolite produced by the pvc gene cluster from <i>Pseudomonas aeruginosa</i> . <i>J Bacteriol.</i> 2008 Oct;190(20):6927-30.                                                                                                             |
| 87 | Panduratsins D-I, novel secondary metabolites from rhizomes of <i>Boesenbergia pandurata</i> . <i>Chem Pharm Bull (Tokyo).</i> 2008 Apr;56(4):491-6.                                                                                                           |
| 88 | Pathway engineering for healthy phytochemicals leading to the production of novel flavonoids in tomato fruit. <i>Plant Biotechnol J.</i> 2006 Jul;4(4):433-44.                                                                                                 |
| 89 | Petrosifungins A and B, novel cyclodepsipeptides from a sponge-derived strain of <i>Penicillium brevicompactum</i> . <i>J Nat Prod.</i> 2004 Mar;67(3):311-5.                                                                                                  |
| 90 | Phenylmannanolones A-C: biosynthesis of new secondary metabolites from the myxobacterium <i>Nannocystis exedens</i> . <i>Chembiochem.</i> 2008 Dec 15;9(18):2997-3003.                                                                                         |
| 91 | Platensimycin is a selective FabF inhibitor with potent antibiotic properties. <i>Nature.</i> 2006 May 18;441(7091):358-61.                                                                                                                                    |
| 92 | Prenylated chalcones, flavone and other constituents of the twigs of <i>Dorstenia angusticornis</i> and <i>Dorstenia barteri</i> var. <i>subtriangularis</i> . <i>Phytochemistry.</i> 2005 Mar;66(6):687-92.                                                   |
| 93 | Profiling of acarviostatin family secondary metabolites secreted by <i>Streptomyces coelicoflavus</i> ZG0656 using ultraperformance liquid chromatography coupled with electrospray ionization mass spectrometry. <i>Anal Chem.</i> 2008 Oct 1;80(19):7554-61. |
| 94 | Proteomics-Based Discovery of Koranimine, a Cyclic Imine Natural Product. <i>J Am Chem Soc.</i> 2011 Apr 26.                                                                                                                                                   |
| 95 | Regulation of alkyl-dihydrothiazole-carboxylates (ATCs) by iron and the pyochelin gene cluster in <i>Pseudomonas aeruginosa</i> . <i>ACS Chem Biol.</i> 2009 Aug 21;4(8):617-23.                                                                               |

|     |                                                                                                                                                                                                                                                             |
|-----|-------------------------------------------------------------------------------------------------------------------------------------------------------------------------------------------------------------------------------------------------------------|
| 96  | Retymicin, galtamycin B, saquayamycin Z and ribofuranosyllumichrome, novel secondary metabolites from <i>Micromonospora</i> sp. Tu 6368. I. Taxonomy, fermentation, isolation and biological activities. <i>J Antibiot (Tokyo)</i> . 2005 Feb;58(2):95-102. |
| 97  | Retymicin, galtamycin B, saquayamycin Z and ribofuranosyllumichrome, novel secondary metabolites from <i>Micromonospora</i> sp. Tu 6368. II. Structure elucidation. <i>J Antibiot (Tokyo)</i> . 2005 Feb;58(2):103-10.                                      |
| 98  | Roquefortine/oxaline biosynthesis pathway metabolites in <i>Penicillium</i> ser. <i>Corymbifera</i> : in planta production and implications for competitive fitness. <i>J Chem Ecol</i> . 2005 Oct;31(10):2373-90.                                          |
| 99  | Salarin C, a member of the salarin superfamily of marine compounds, is a potent inducer of apoptosis. <i>Invest New Drugs</i> . 2010 Aug 24.                                                                                                                |
| 100 | Scale-up of centrifugal impeller bioreactor for hyperproduction of ginseng saponin and polysaccharide by high-density cultivation of panax notoginseng cells. <i>Biotechnol Prog</i> . 2004 Jul-Aug;20(4):1076-81.                                          |
| 101 | Sch 213766, a novel chemokine receptor CCR-5 inhibitor from <i>Chaetomium globosum</i> . <i>J Antibiot (Tokyo)</i> . 2007 Aug;60(8):524-8.                                                                                                                  |
| 102 | Secondary metabolites from Eurotium species, <i>Aspergillus calidoustus</i> and <i>A. insuetus</i> common in Canadian homes with a review of their chemistry and biological activities. <i>Mycol Res</i> . 2009 Apr;113(Pt 4):480-90.                       |
| 103 | Secondary metabolites from the leaves of <i>Feijoa sellowiana</i> Berg. <i>Phytochemistry</i> . 2004 Nov;65(21):2947-51.                                                                                                                                    |
| 104 | Secondary metabolites from the roots of <i>Paronychia chionaea</i> . <i>Nat Prod Commun</i> . 2011 Feb;6(2):205-8.                                                                                                                                          |
| 105 | Sfp-type 4'-phosphopantetheinyl transferase is indispensable for fungal pathogenicity. <i>Plant Cell</i> . 2009 Oct;21(10):3379-96.                                                                                                                         |
| 106 | Small-molecule elicitation of microbial secondary metabolites. <i>Microb Biotechnol</i> . 2010 Jul 26.                                                                                                                                                      |
| 107 | Spectroscopic detection of pharmaceutical compounds from an aflatoxigenic strain of <i>Aspergillus parasiticus</i> . <i>Microbiol Res</i> . 2010 Aug 20;165(6):516-22.                                                                                      |
| 108 | <i>Streptomyces</i> associated with a marine sponge <i>Haliclona</i> sp.; biosynthetic genes for secondary metabolites and products. <i>Environ Microbiol</i> . 2011 Feb;13(2):391-403.                                                                     |
| 109 | Structure Elucidation and Absolute Stereochemistry of Isomeric Monoterpene Chromane Esters. <i>J Org Chem</i> . 2011 Apr 15;76(8):2603-2612.                                                                                                                |
| 110 | The in vivo response of novel buprenorphine metabolites, M1 and M3, to antiretroviral inducers and inhibitors of buprenorphine metabolism. <i>Basic Clin Pharmacol Toxicol</i> . 2009 Sep;105(3):211-5.                                                     |
| 111 | Three-step hydroxylation of vitamin D3 by a genetically engineered CYP105A1: enzymes and catalysis. <i>FEBS J</i> . 2010 Oct;277(19):3999-4009.                                                                                                             |
| 112 | TLN-4601 suppresses growth and induces apoptosis of pancreatic carcinoma cells through inhibition of Ras-ERK MAPK signaling. <i>J Mol Signal</i> . 2010 Nov 2;5:18.                                                                                         |
| 113 | Trypanocidal activity of a new pterocarpan and other secondary metabolites of plants from Northeastern Brazil flora. <i>Bioorg Med Chem</i> . 2008 Feb 15;16(4):1676-82.                                                                                    |
| 114 | Two novel antibiotics, Sch 419558 and Sch 419559, produced by <i>Pseudomonas fluorescens</i> : effect on activity by overexpression of RpoE. <i>Bioorg Med Chem</i> . 2004 Jun 15;12(12):3333-8.                                                            |
| 115 | Withanolide A is inherently de novo biosynthesized in roots of the medicinal plant <i>Ashwagandha</i> ( <i>Withania somnifera</i> ). <i>Physiol Plant</i> . 2008 Jun;133(2):278-87.                                                                         |
| 116 | Wuweizidilactones A-F: novel highly oxygenated nortriterpenoids with unusual skeletons isolated from <i>Schisandra chinensis</i> . <i>Chemistry</i> . 2007;13(17):4816-22.                                                                                  |
| 117 | Zooxanthellamide B, a novel large polyhydroxy metabolite from a marine dinoflagellate of <i>Symbiodinium</i> sp. <i>Biosci Biotechnol Biochem</i> . 2004 Apr;68(4):955-8.                                                                                   |



**SI Appendix Table S14** List of drug-productive species-families and their corresponding labels used in **SI Appendix Figure 17**.

| Label | Drug-productive species-family | Superkingdom/kingdom |
|-------|--------------------------------|----------------------|
| F1    | Micromonosporaceae             | Bacteria             |
| F2    | Streptomycetaceae              | Bacteria             |
| F3    | Pseudonocardiaceae             | Bacteria             |
| F4    | Actinosynnemataceae            | Bacteria             |
| F5    | Actinomycetaceae               | Bacteria             |
| F6    | Paenibacillaceae               | Bacteria             |
| F7    | Neisseriaceae                  | Bacteria             |
| F8    | Polyangiaceae                  | Bacteria             |
| F9    | Amphisphaeriaceae              | Fungi                |
| F10   | Clavicipitaceae                | Fungi                |
| F11   | Nectriaceae                    | Fungi                |
| F12   | Acremonium                     | Fungi                |
| F13   | Emericellopsis                 | Fungi                |
| F14   | Trichocomaceae                 | Fungi                |
| F15   | Pleurotaceae                   | Fungi                |
| F16   | Entolomataceae                 | Fungi                |
| F17   | Ephedraceae                    | Viridiplantae        |
| F18   | Papaveraceae                   | Viridiplantae        |
| F19   | Menispermaceae                 | Viridiplantae        |
| F20   | Berberidaceae                  | Viridiplantae        |
| F21   | Amaranthaceae                  | Viridiplantae        |
| F22   | Fabaceae                       | Viridiplantae        |
| F23   | Betulaceae                     | Viridiplantae        |
| F24   | Moraceae                       | Viridiplantae        |
| F25   | Salicaceae                     | Viridiplantae        |
| F26   | Rutaceae                       | Viridiplantae        |
| F27   | Sapindaceae                    | Viridiplantae        |
| F28   | Malvaceae                      | Viridiplantae        |
| F29   | Asteraceae                     | Viridiplantae        |
| F30   | Theaceae                       | Viridiplantae        |
| F31   | Plantaginaceae                 | Viridiplantae        |
| F32   | Loganiaceae                    | Viridiplantae        |
| F33   | Apocynaceae                    | Viridiplantae        |
| F34   | Rubiaceae                      | Viridiplantae        |
| F35   | Icacinaceae                    | Viridiplantae        |

|     |                 |               |
|-----|-----------------|---------------|
| F36 | Solanaceae      | Viridiplantae |
| F37 | Cornaceae       | Viridiplantae |
| F38 | Colchicaceae    | Viridiplantae |
| F39 | Poaceae         | Viridiplantae |
| F40 | Arecaceae       | Viridiplantae |
| F41 | Amaryllidaceae  | Viridiplantae |
| F42 | Pinaceae        | Viridiplantae |
| F43 | Taxaceae        | Viridiplantae |
| F44 | Thorectidae     | Metazoa       |
| F45 | Halichondriidae | Metazoa       |
| F46 | Tethyidae       | Metazoa       |
| F47 | Perophoridae    | Metazoa       |
| F48 | Hominidae       | Metazoa       |
| F49 | Muridae         | Metazoa       |
| F50 | Viperidae       | Metazoa       |
| F51 | Glossiphoniidae | Metazoa       |
| F52 | Hirudinidae     | Metazoa       |
| F53 | Sphingidae      | Metazoa       |

**SI Appendix Figure S1** Top-ranked drug-prolific species families that produced high percentage of approved drugs with respect to the known bioactive natural products from each family. Only those families with >20 known natural products (including natural product leads of approved and clinical trial drugs) are included in this analysis.

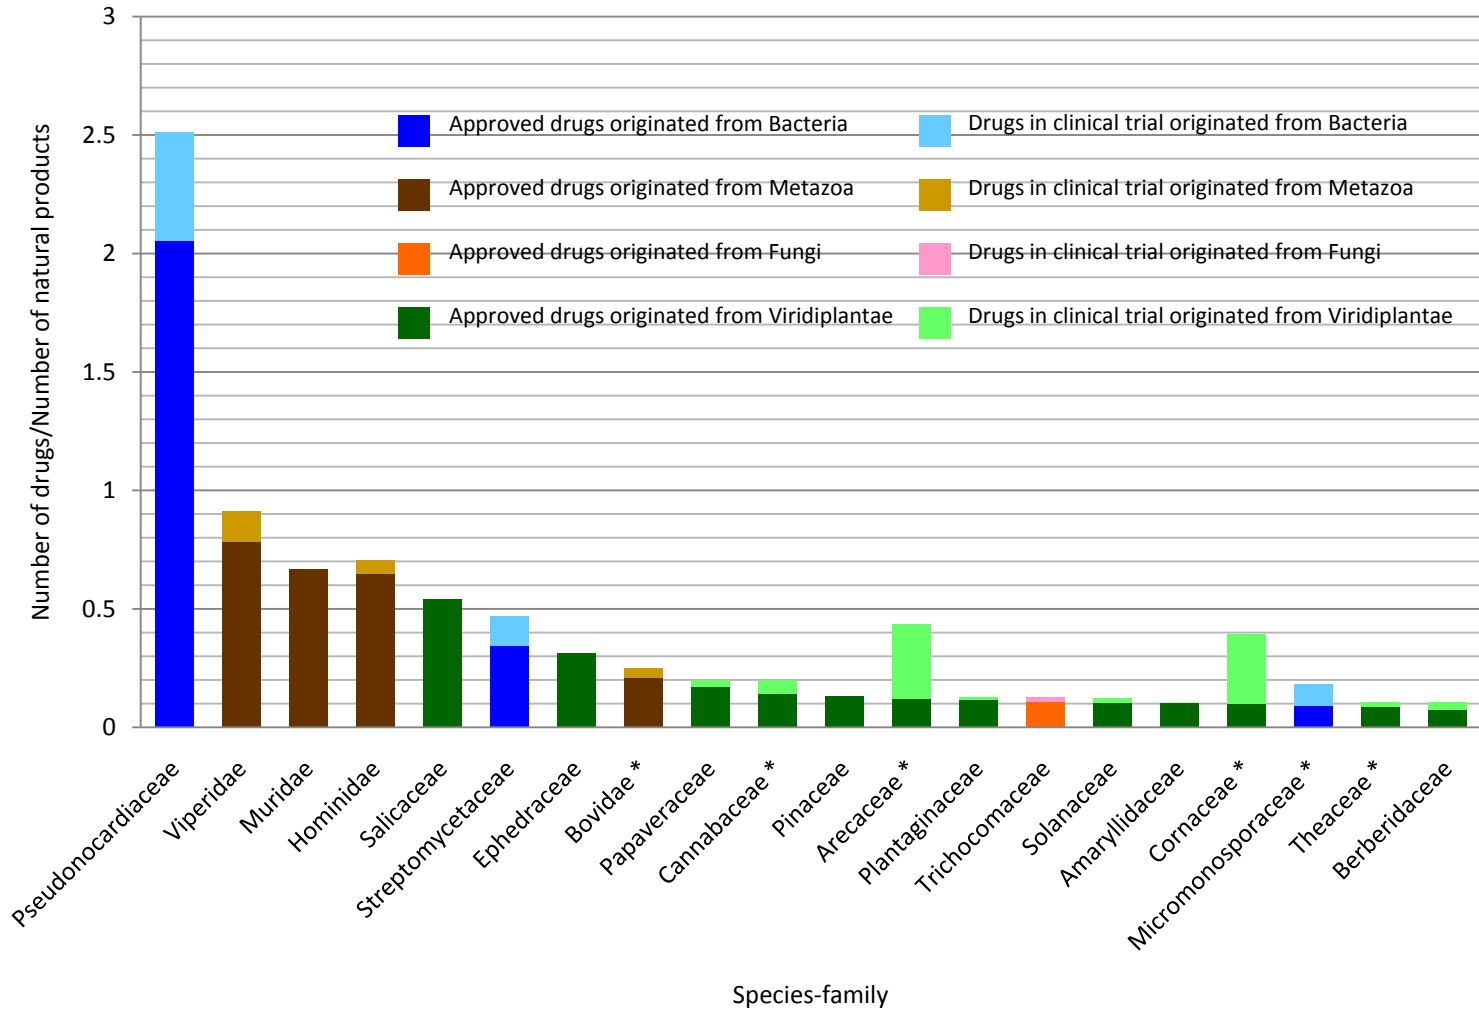

**SI Appendix Figure S2** Top-ranked clinical-trial families that delivered higher number of clinical-trial drugs but no approved drug.

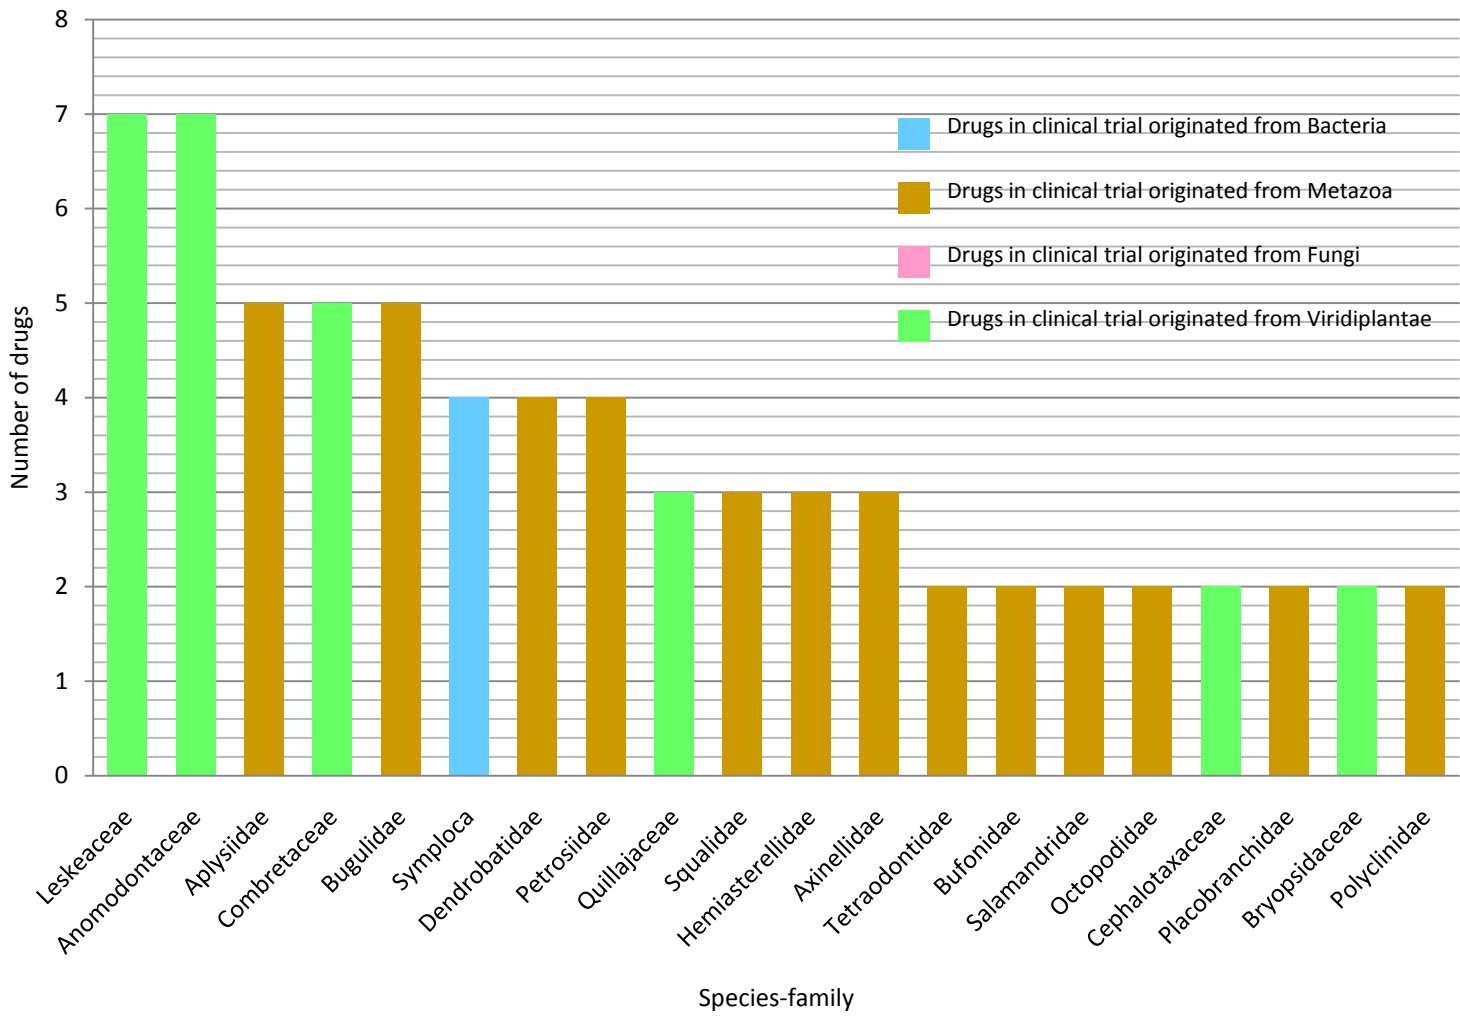

**SI Appendix Figure S3** Distribution of drug-productive families in the phylogenetic tree of fungi kingdom. The coloring and labeling schemes are the same as Figure 2.





**SI Appendix Figure S4** Distribution of drug-productive families in the phylogenetic tree of metazoa kingdom. The coloring and labeling schemes are the same as Figure 2.

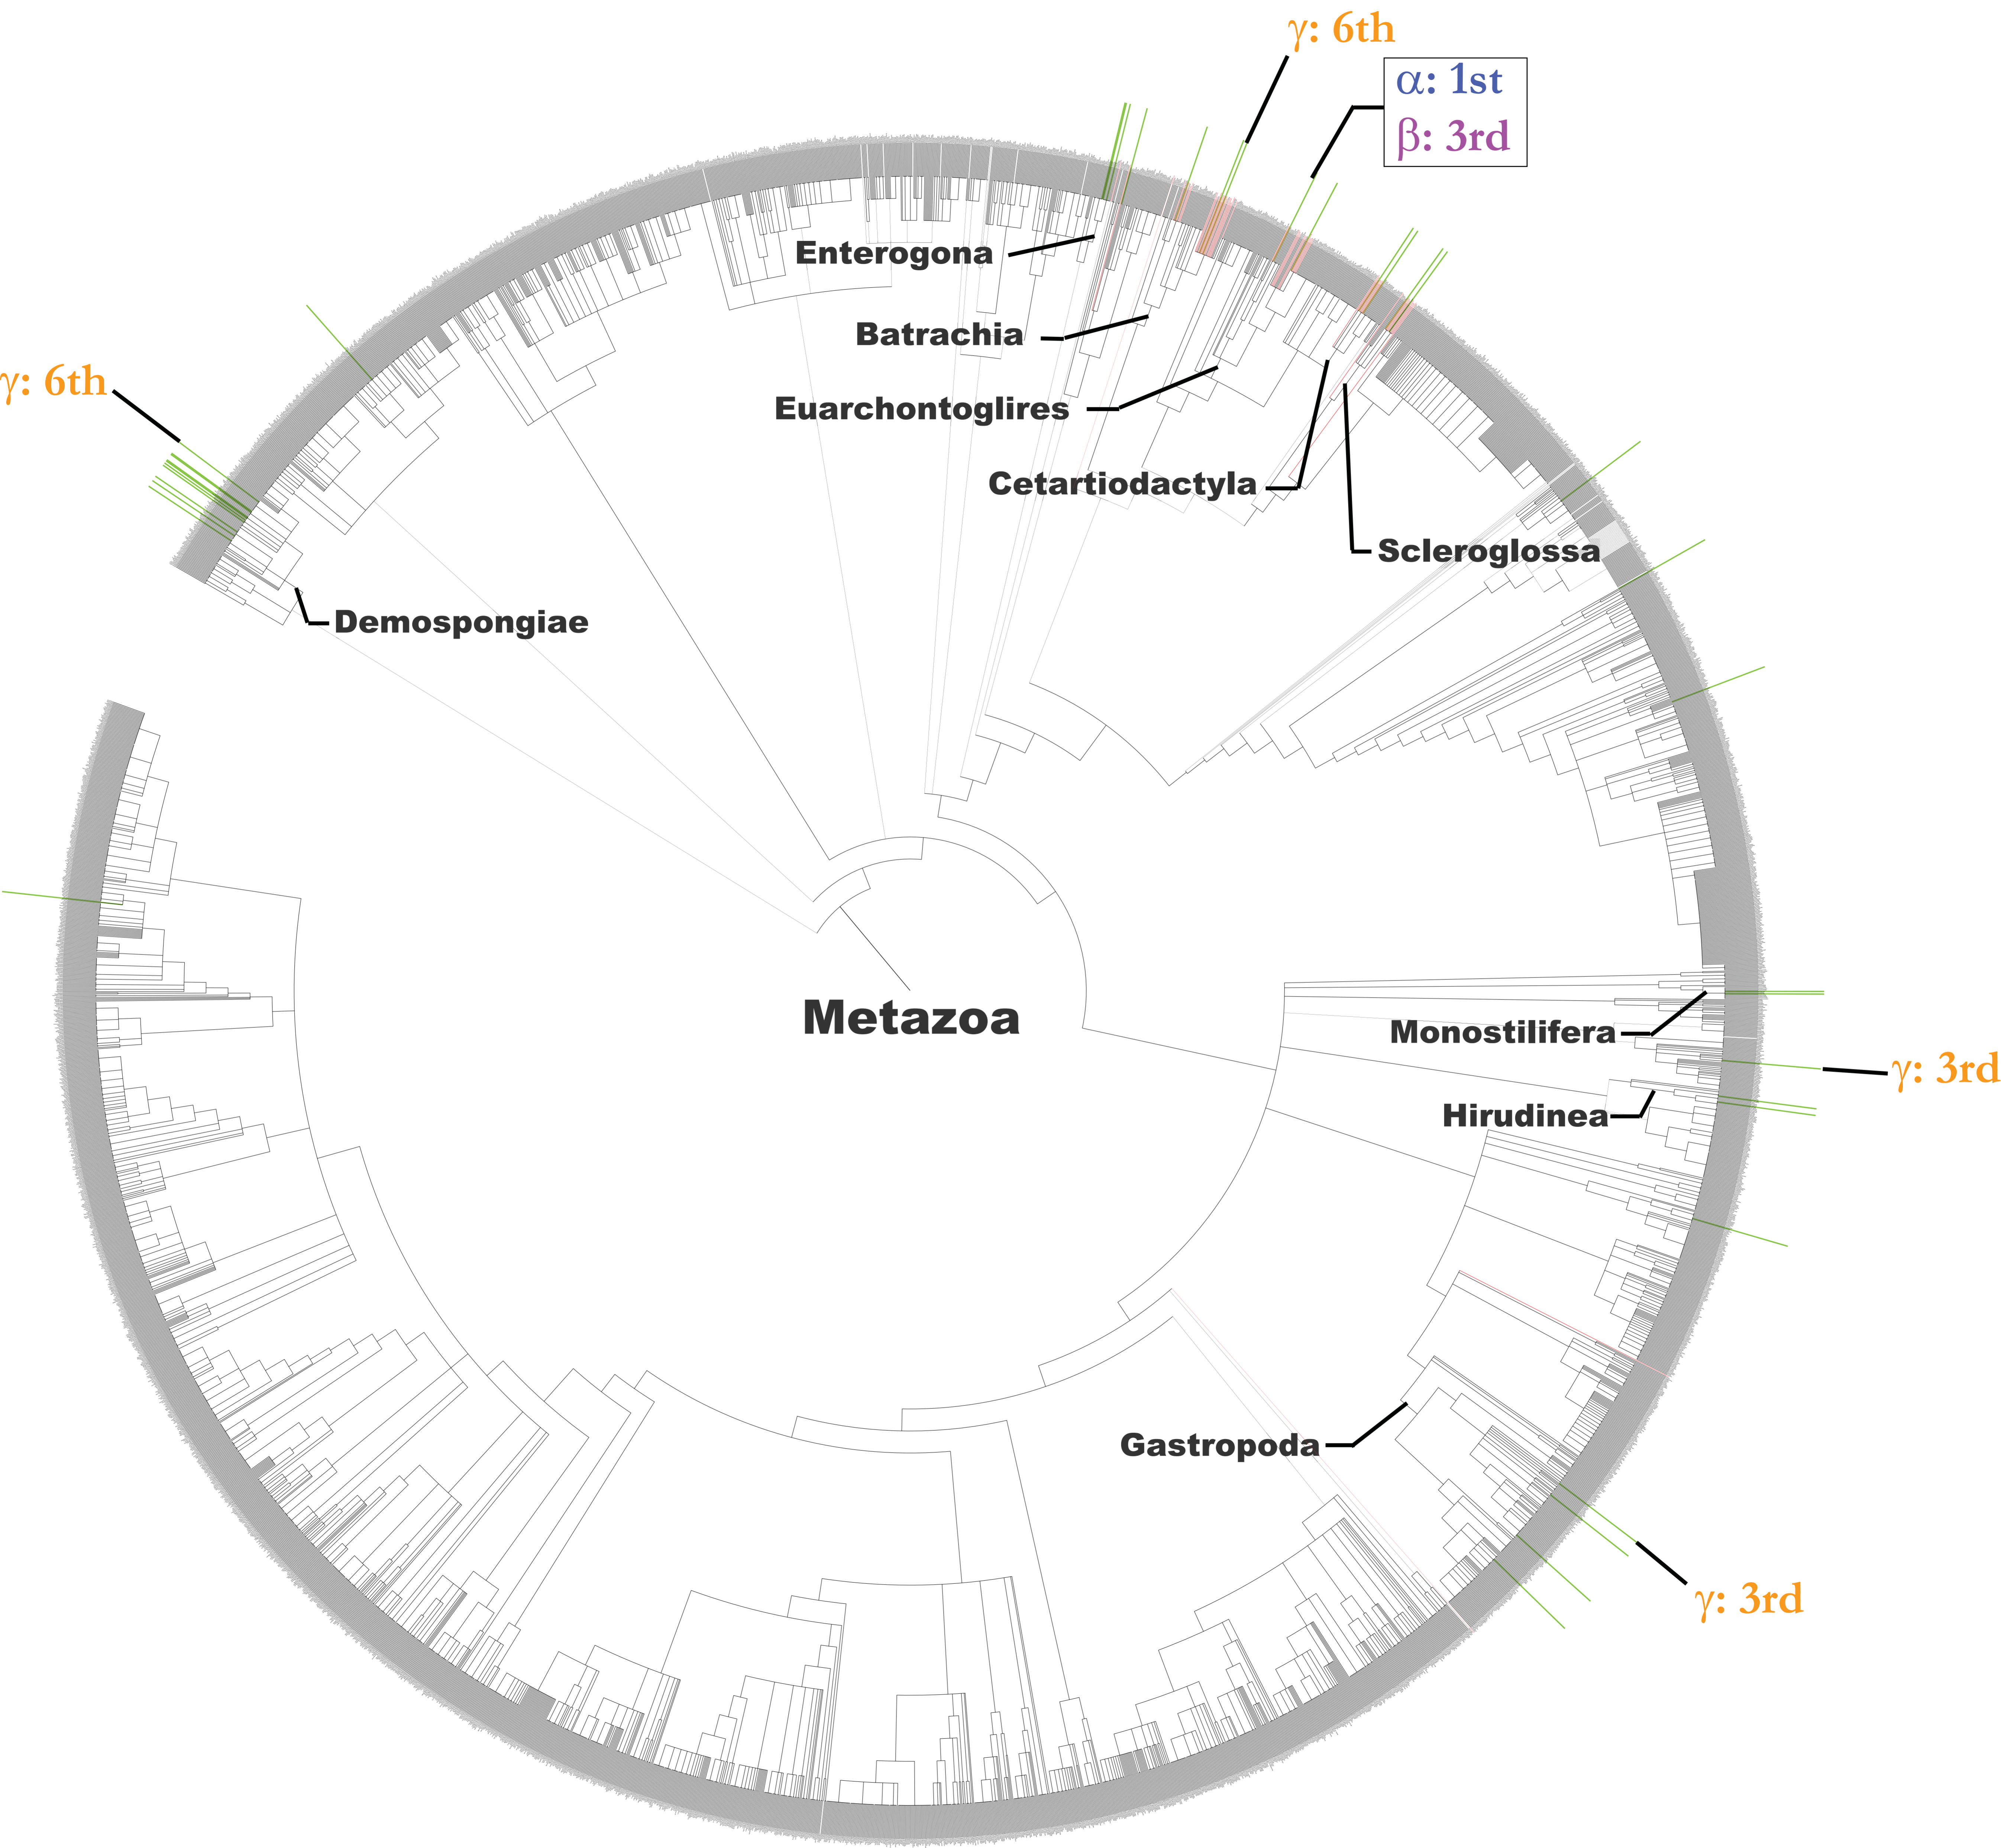

**SI Appendix Figure S5** Distribution patterns of the known bioactive natural products (including the natural product leads of approved and clinical-trial drugs) in the species-families of Bacterial super-kingdom. The drug-productive families, the non-drug-productive families in drug-productive clusters, and the non-drug-productive families outside drug-productive clusters are in green, light-green, and brown background color respectively. The drug-productive clusters are labeled by the respective species-group name in black color. Potential drug-productive clusters are not labeled.



**SI Appendix Figure S6** Distribution patterns of the known bioactive natural products (including the natural product leads of approved and clinical-trial drugs) in the species-families of viridiplantae kingdom. The coloring and labeling schemes are the same as in **SI Appendix Figure S4**.



**SI Appendix Figure S7** Distribution patterns of the known bioactive natural products (including the natural product leads of approved and clinical-trial drugs) in the species-families of fungi kingdom. The coloring and labeling schemes are the same as in **SI Appendix Figure S4**.





**SI Appendix Figure S8** Distribution patterns of the known bioactive natural products (including the natural product leads of approved and clinical-trial drugs) in the species-families of metazoa kingdom. The coloring and labeling schemes are the same as in **SI Appendix Figure S4**.

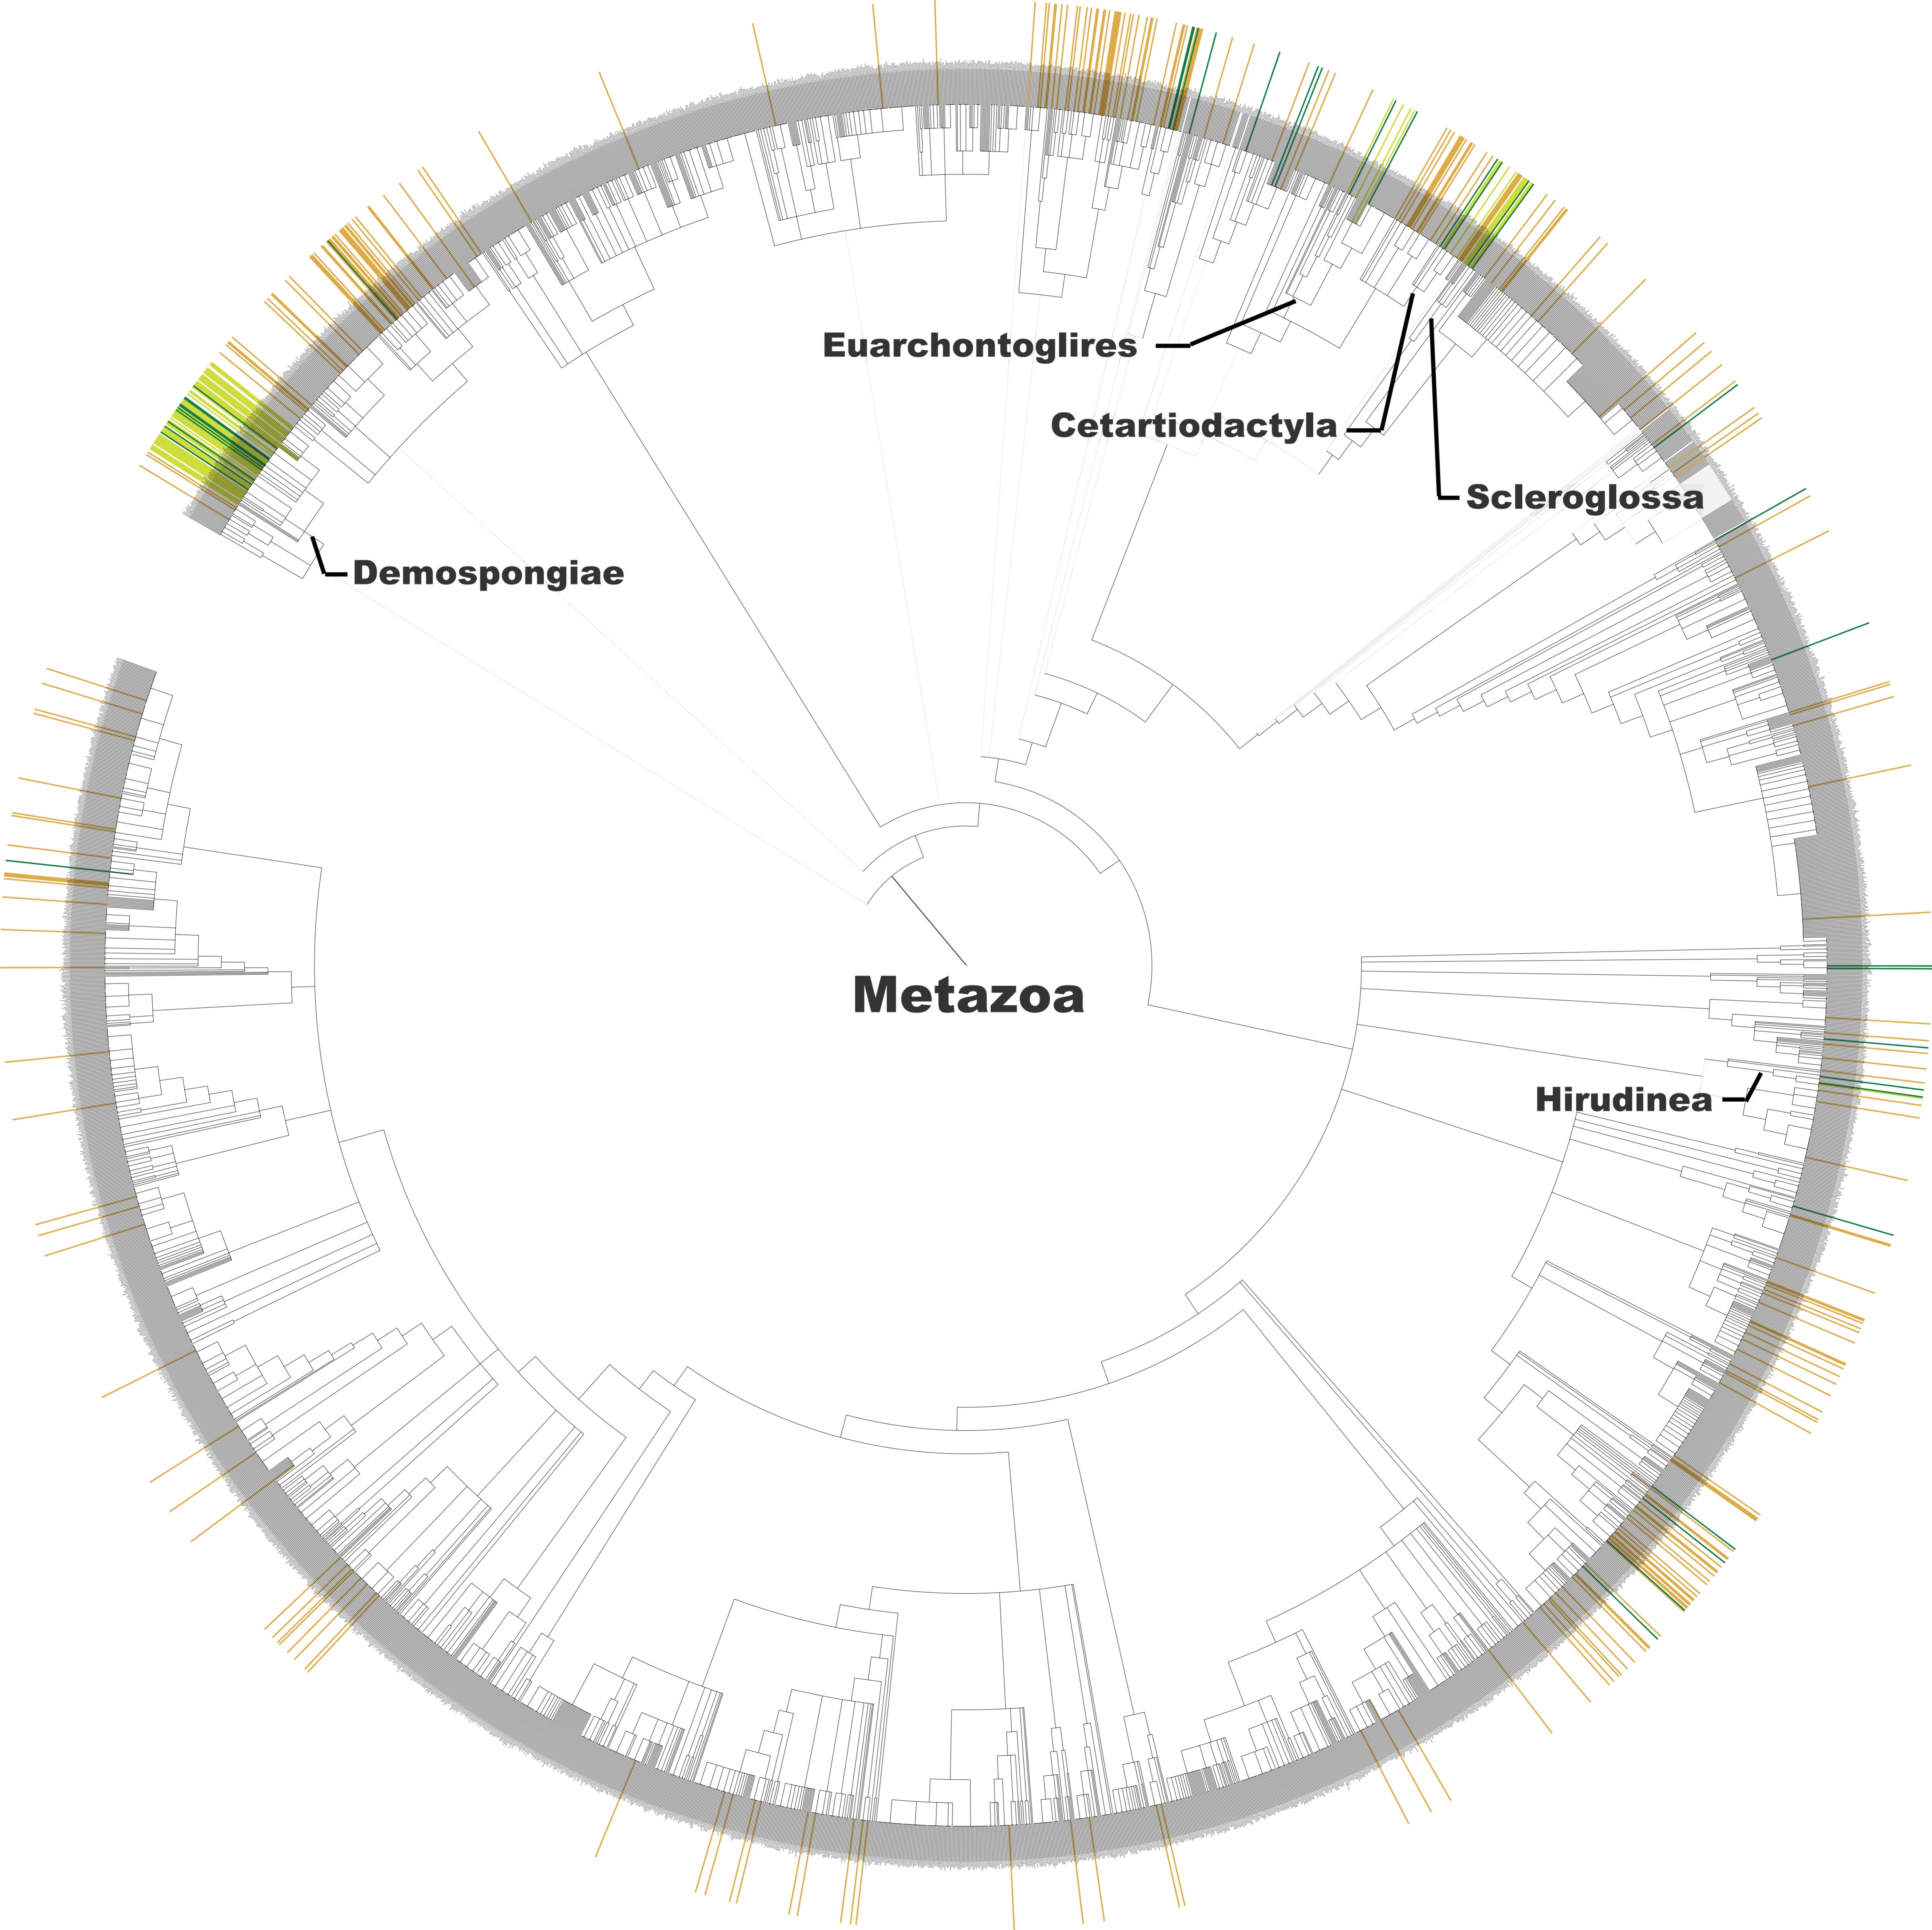

**SI Appendix Figure S9** Distribution patterns of the advanced-stage preclinical-trial drugs (natural products or natural product leads) in the species-families of Bacterial super-kingdom. The coloring and labeling schemes are the same as in **SI Appendix Figure S4**.



**SI Appendix Figure S10** Distribution patterns of the advanced-stage preclinical-trial drugs (natural products or natural product leads) in the species-families of viridiplantae kingdom. The coloring and labeling schemes are the same as in **SI Appendix Figure S4**.

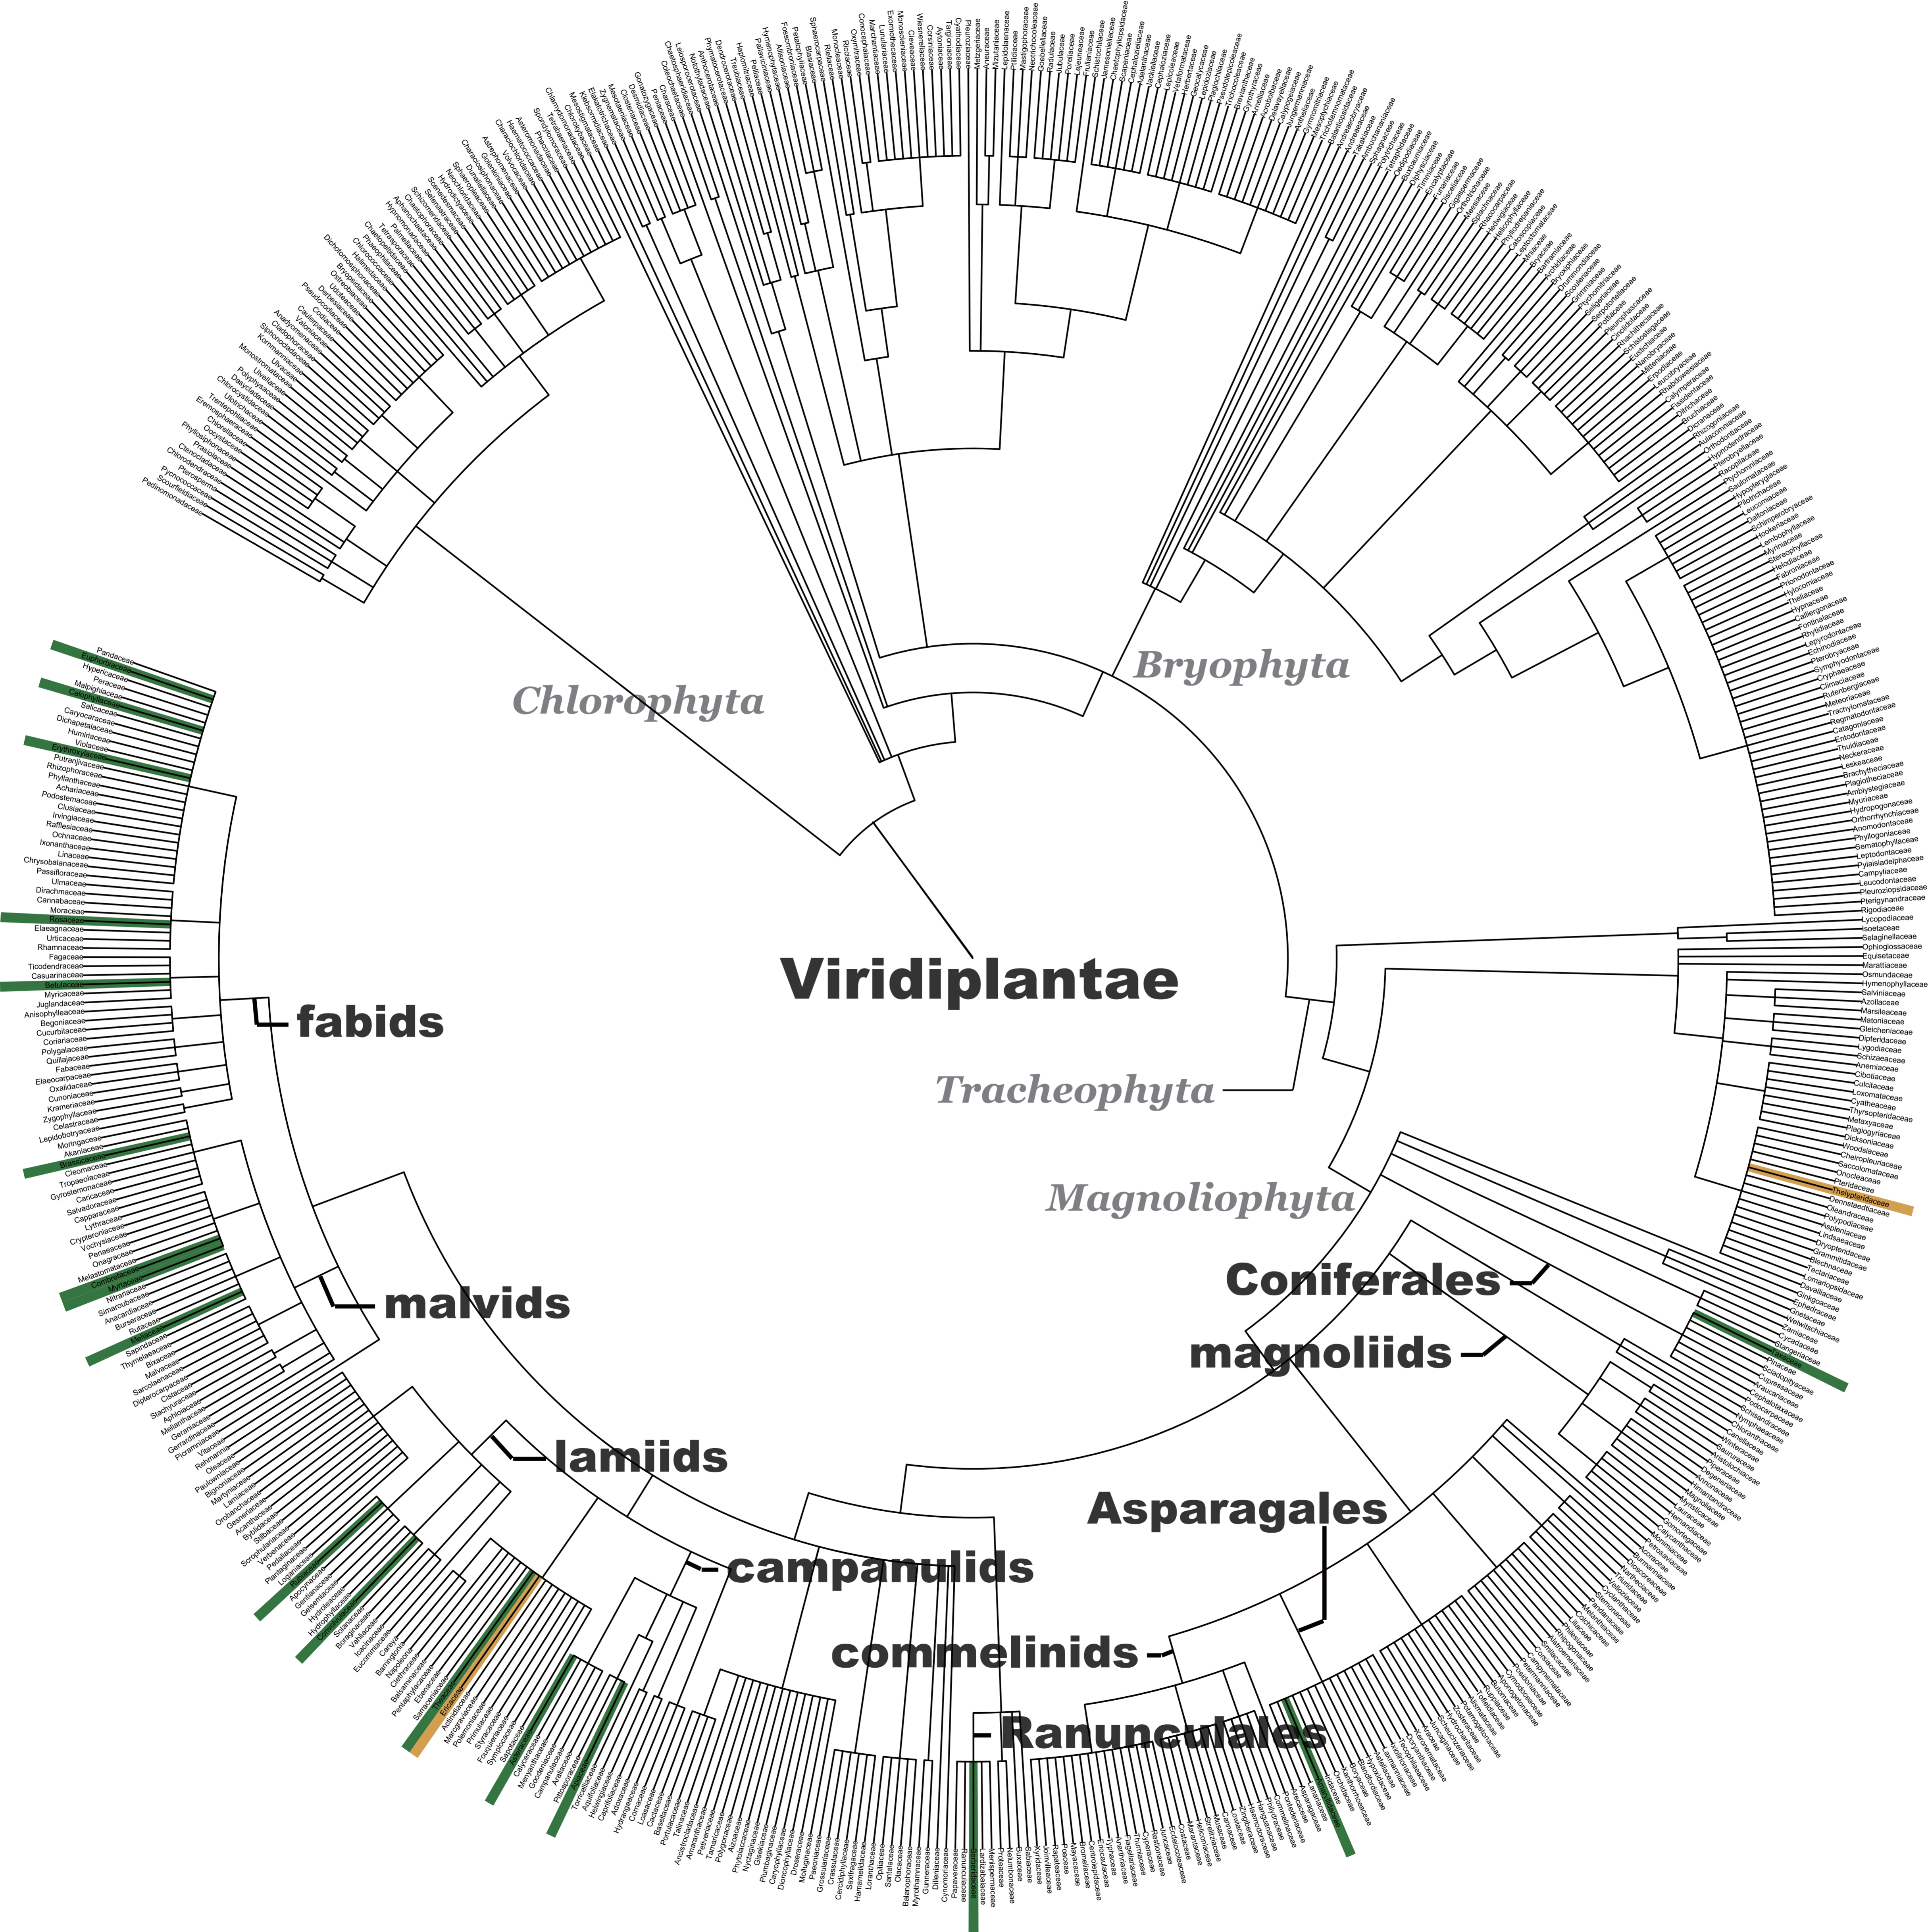

*Chlorophyta*

*Bryophyta*

**Viridiplantae**

*Tracheophyta*

*Magnoliophyta*

**Coniferales**

**magnoliids**

**Asparagales**

**commelinids**

**Ranunculales**

**fabids**

**malvids**

**lamiids**

**campanulids**

**SI Appendix Figure S11** Distribution patterns of the advanced-stage preclinical-trial drugs (natural products or natural product leads) in the species-families of fungi kingdom. The coloring and labeling schemes are the same as in **SI Appendix Figure S4**.





**SI Appendix Figure S12** Distribution patterns of the advanced-stage preclinical-trial drugs (natural products or natural product leads) in the species-families of metazoa kingdom. The coloring and labeling schemes are the same as in **SI Appendix Figure S4**.

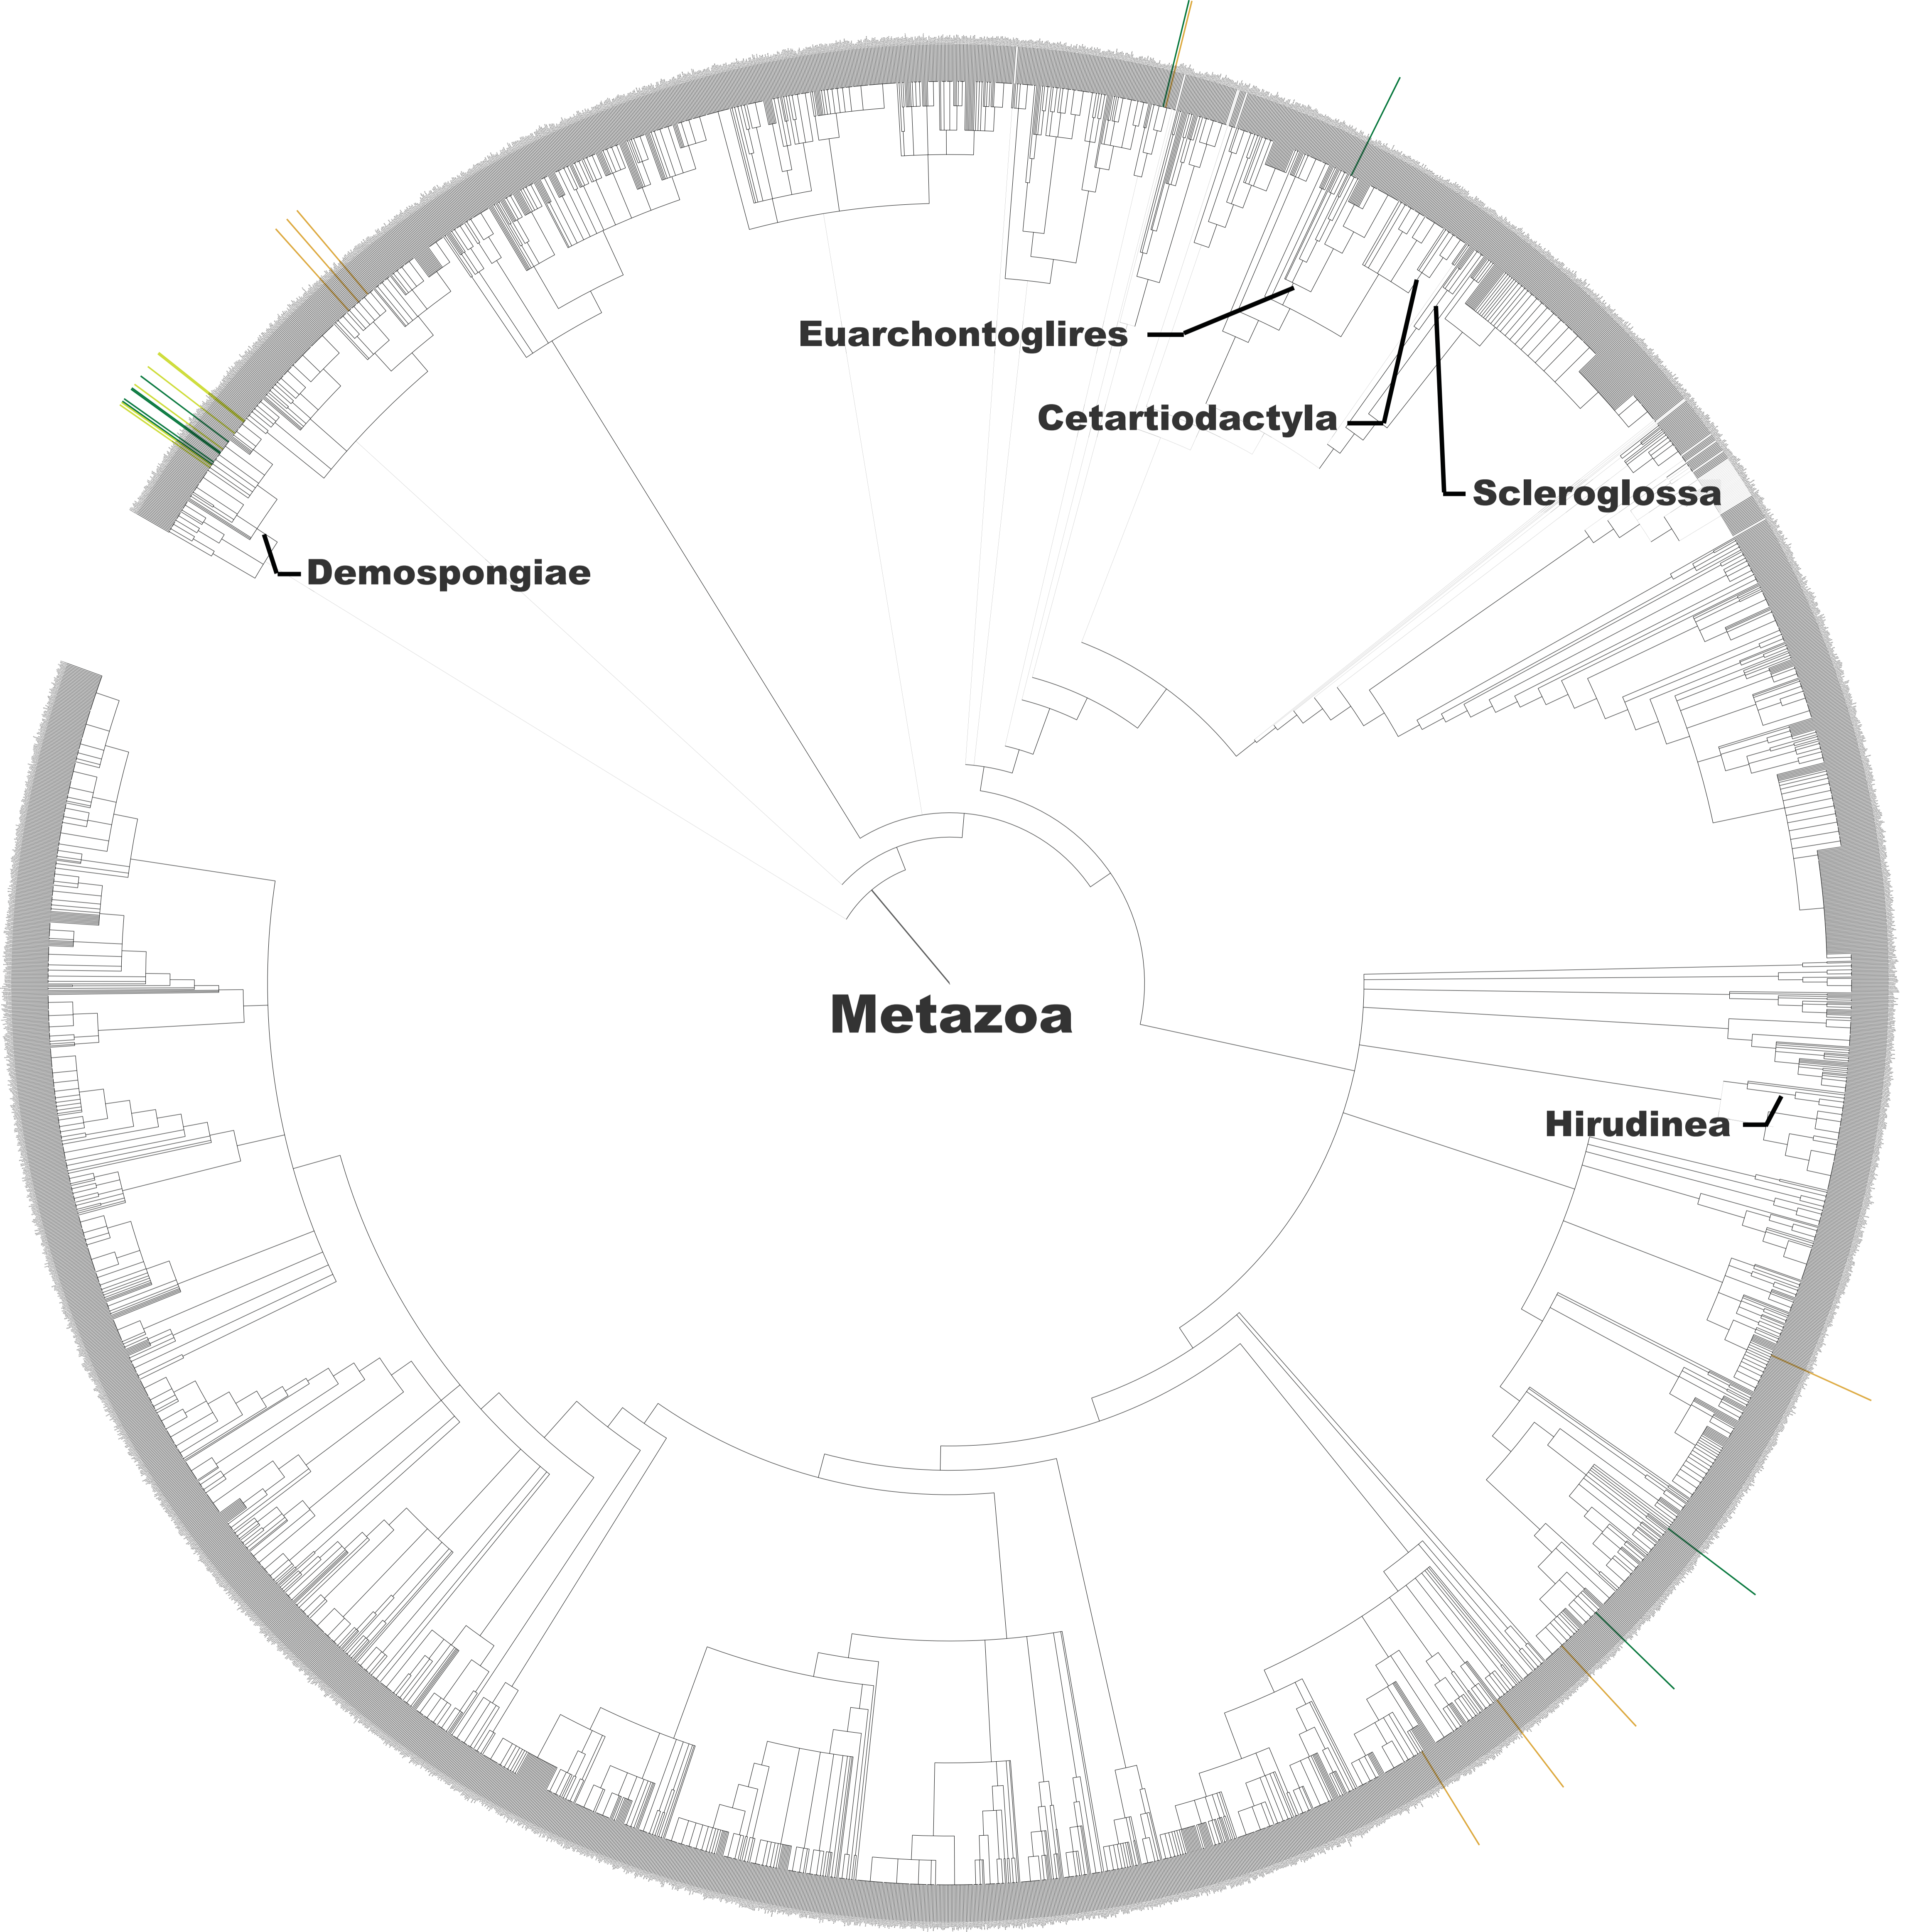

**SI Appendix Figure S13** Time-dependent distribution patterns of historically emerged drug-productive families in the phylogenetic trees of bacterial super-kingdom. The pre-1981 families are in grey color, and the new families emerged in 1981-1985, 1986-1990, 1991-1995, 1996-2000, 2001-2005, and 2006-2010 periods are in dark blue, violet, light blue, orange, green and red color respectively. The drug-productive clusters are labeled in black color by the respective species-group name and the year of their emergence (the pre-1981 clusters are labeled as 1981, the post-1981 clusters are labeled by the last year of the 5-year period in which they emerged).

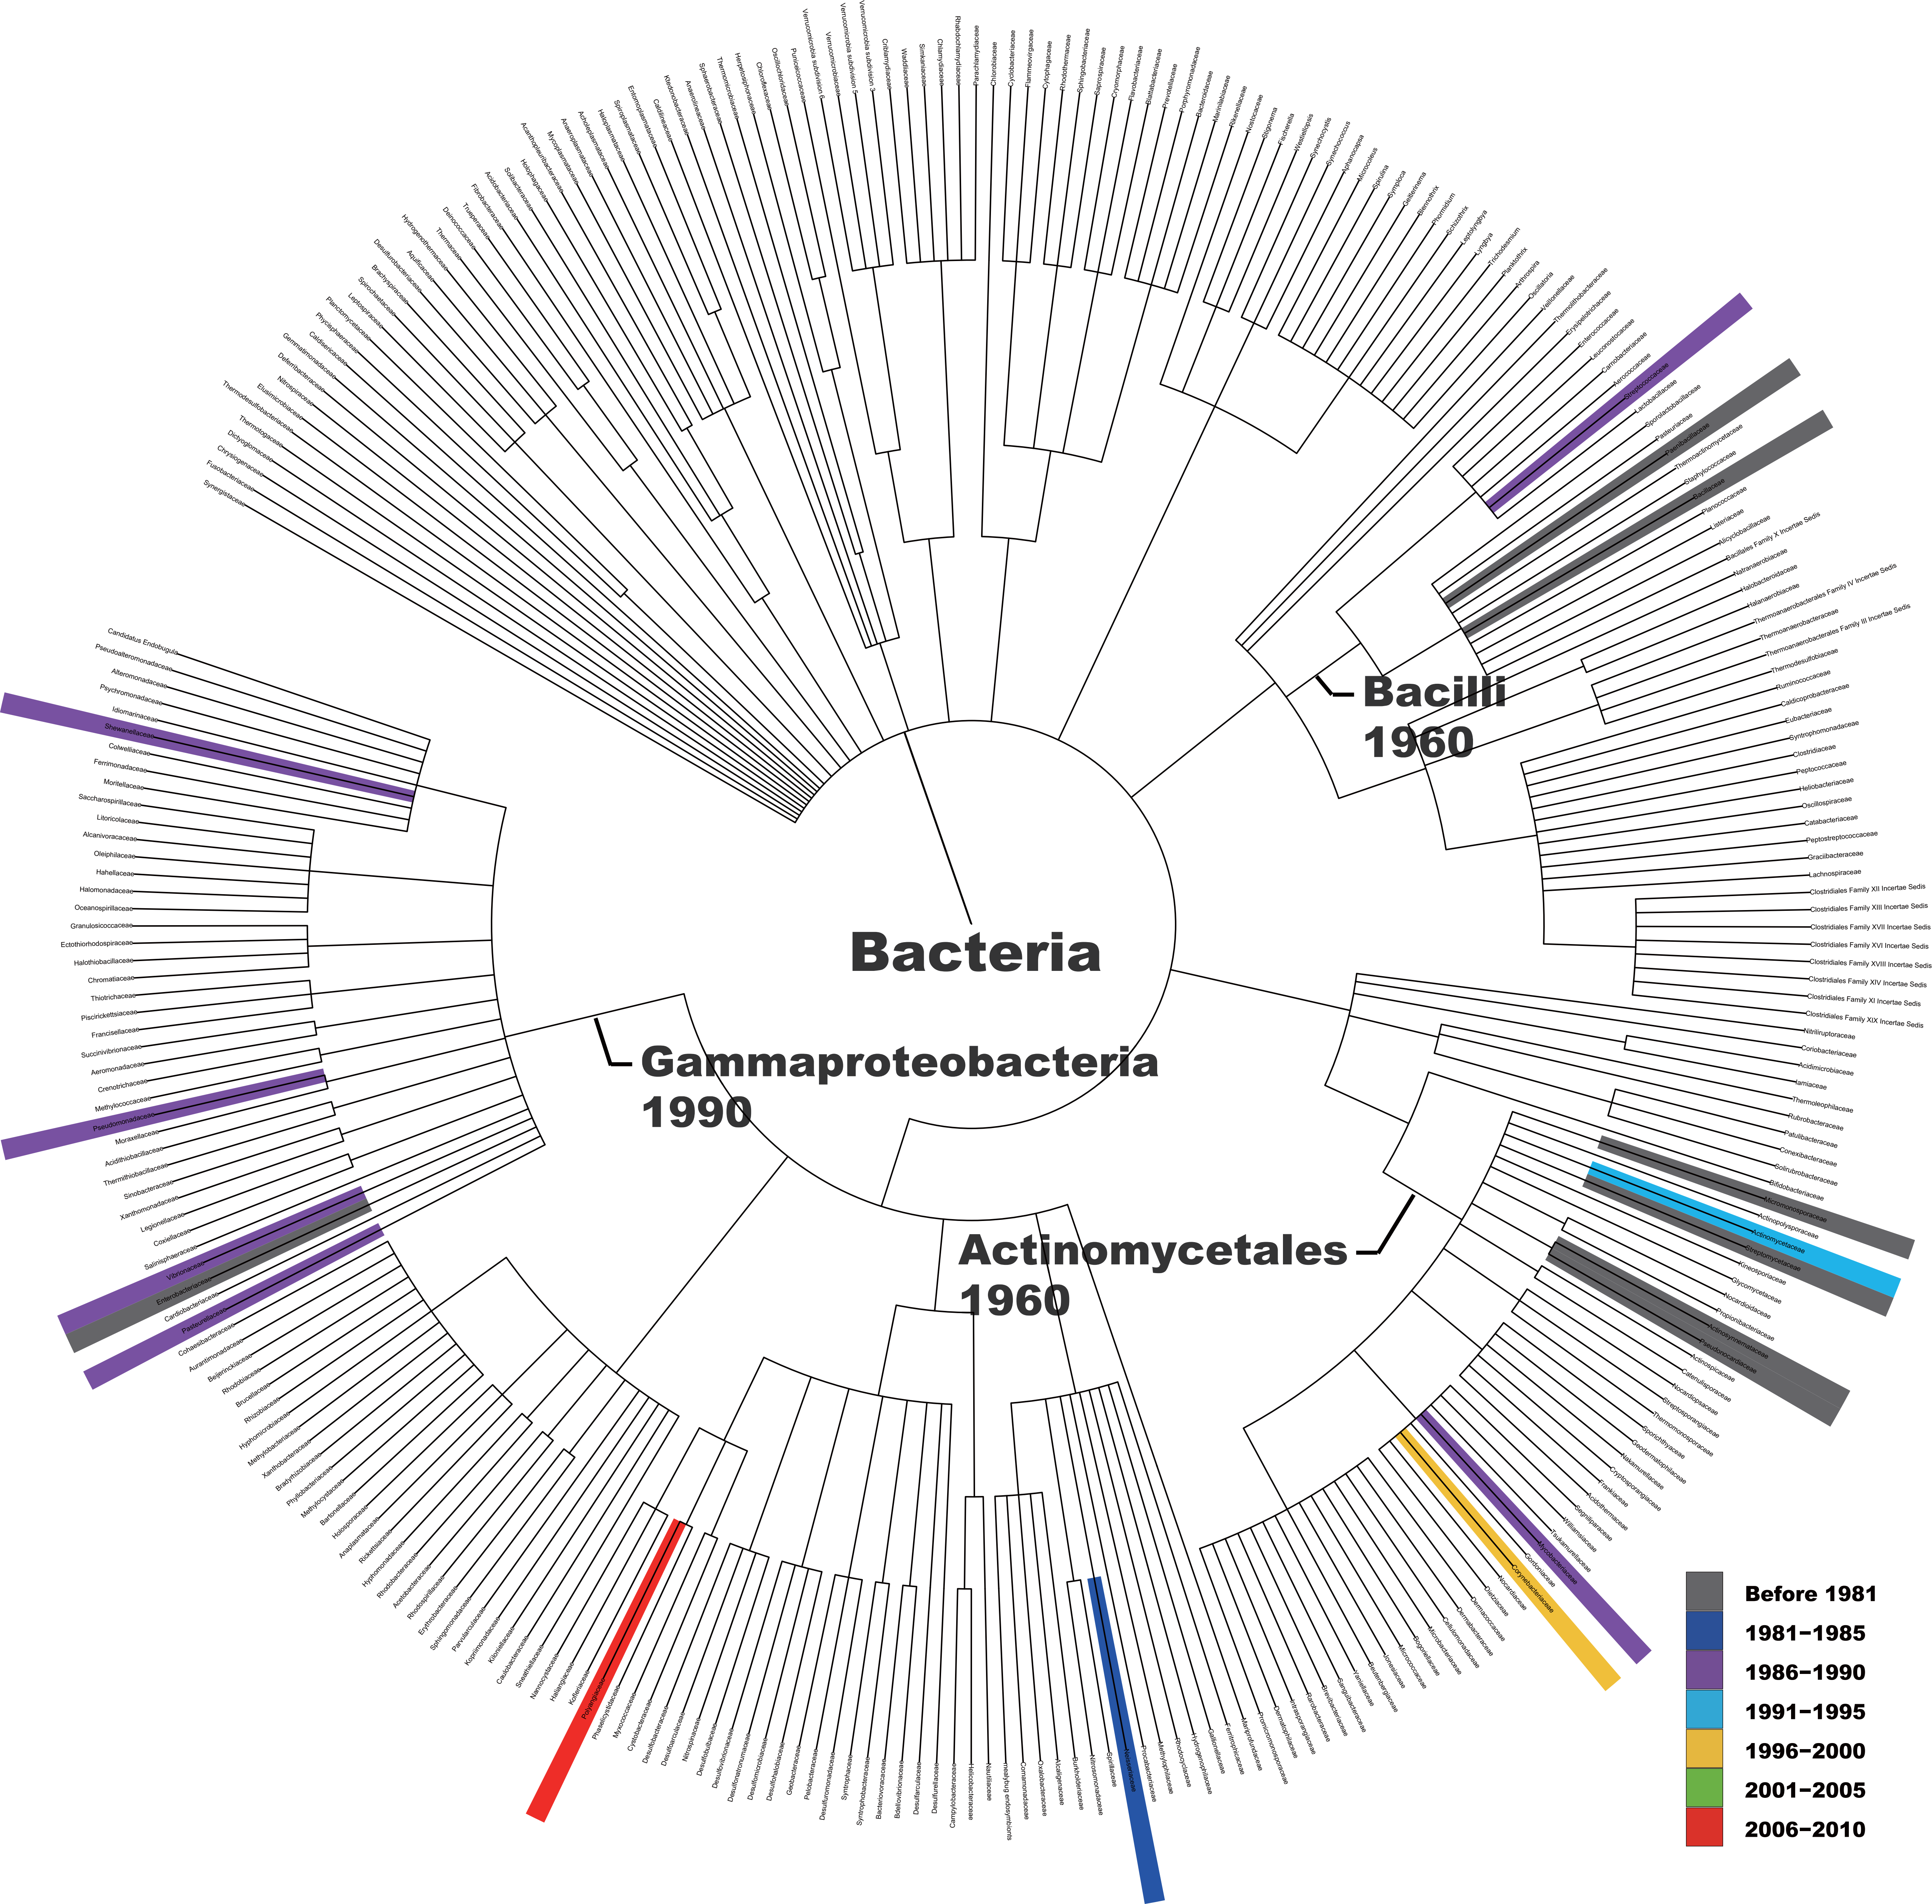

**SI Appendix Figure S14** Time-dependent distribution patterns of historically emerged drug-productive families in the phylogenetic trees of viridiplantae kingdom. The coloring and labeling schemes are the same as in **SI Appendix Figure S12**.

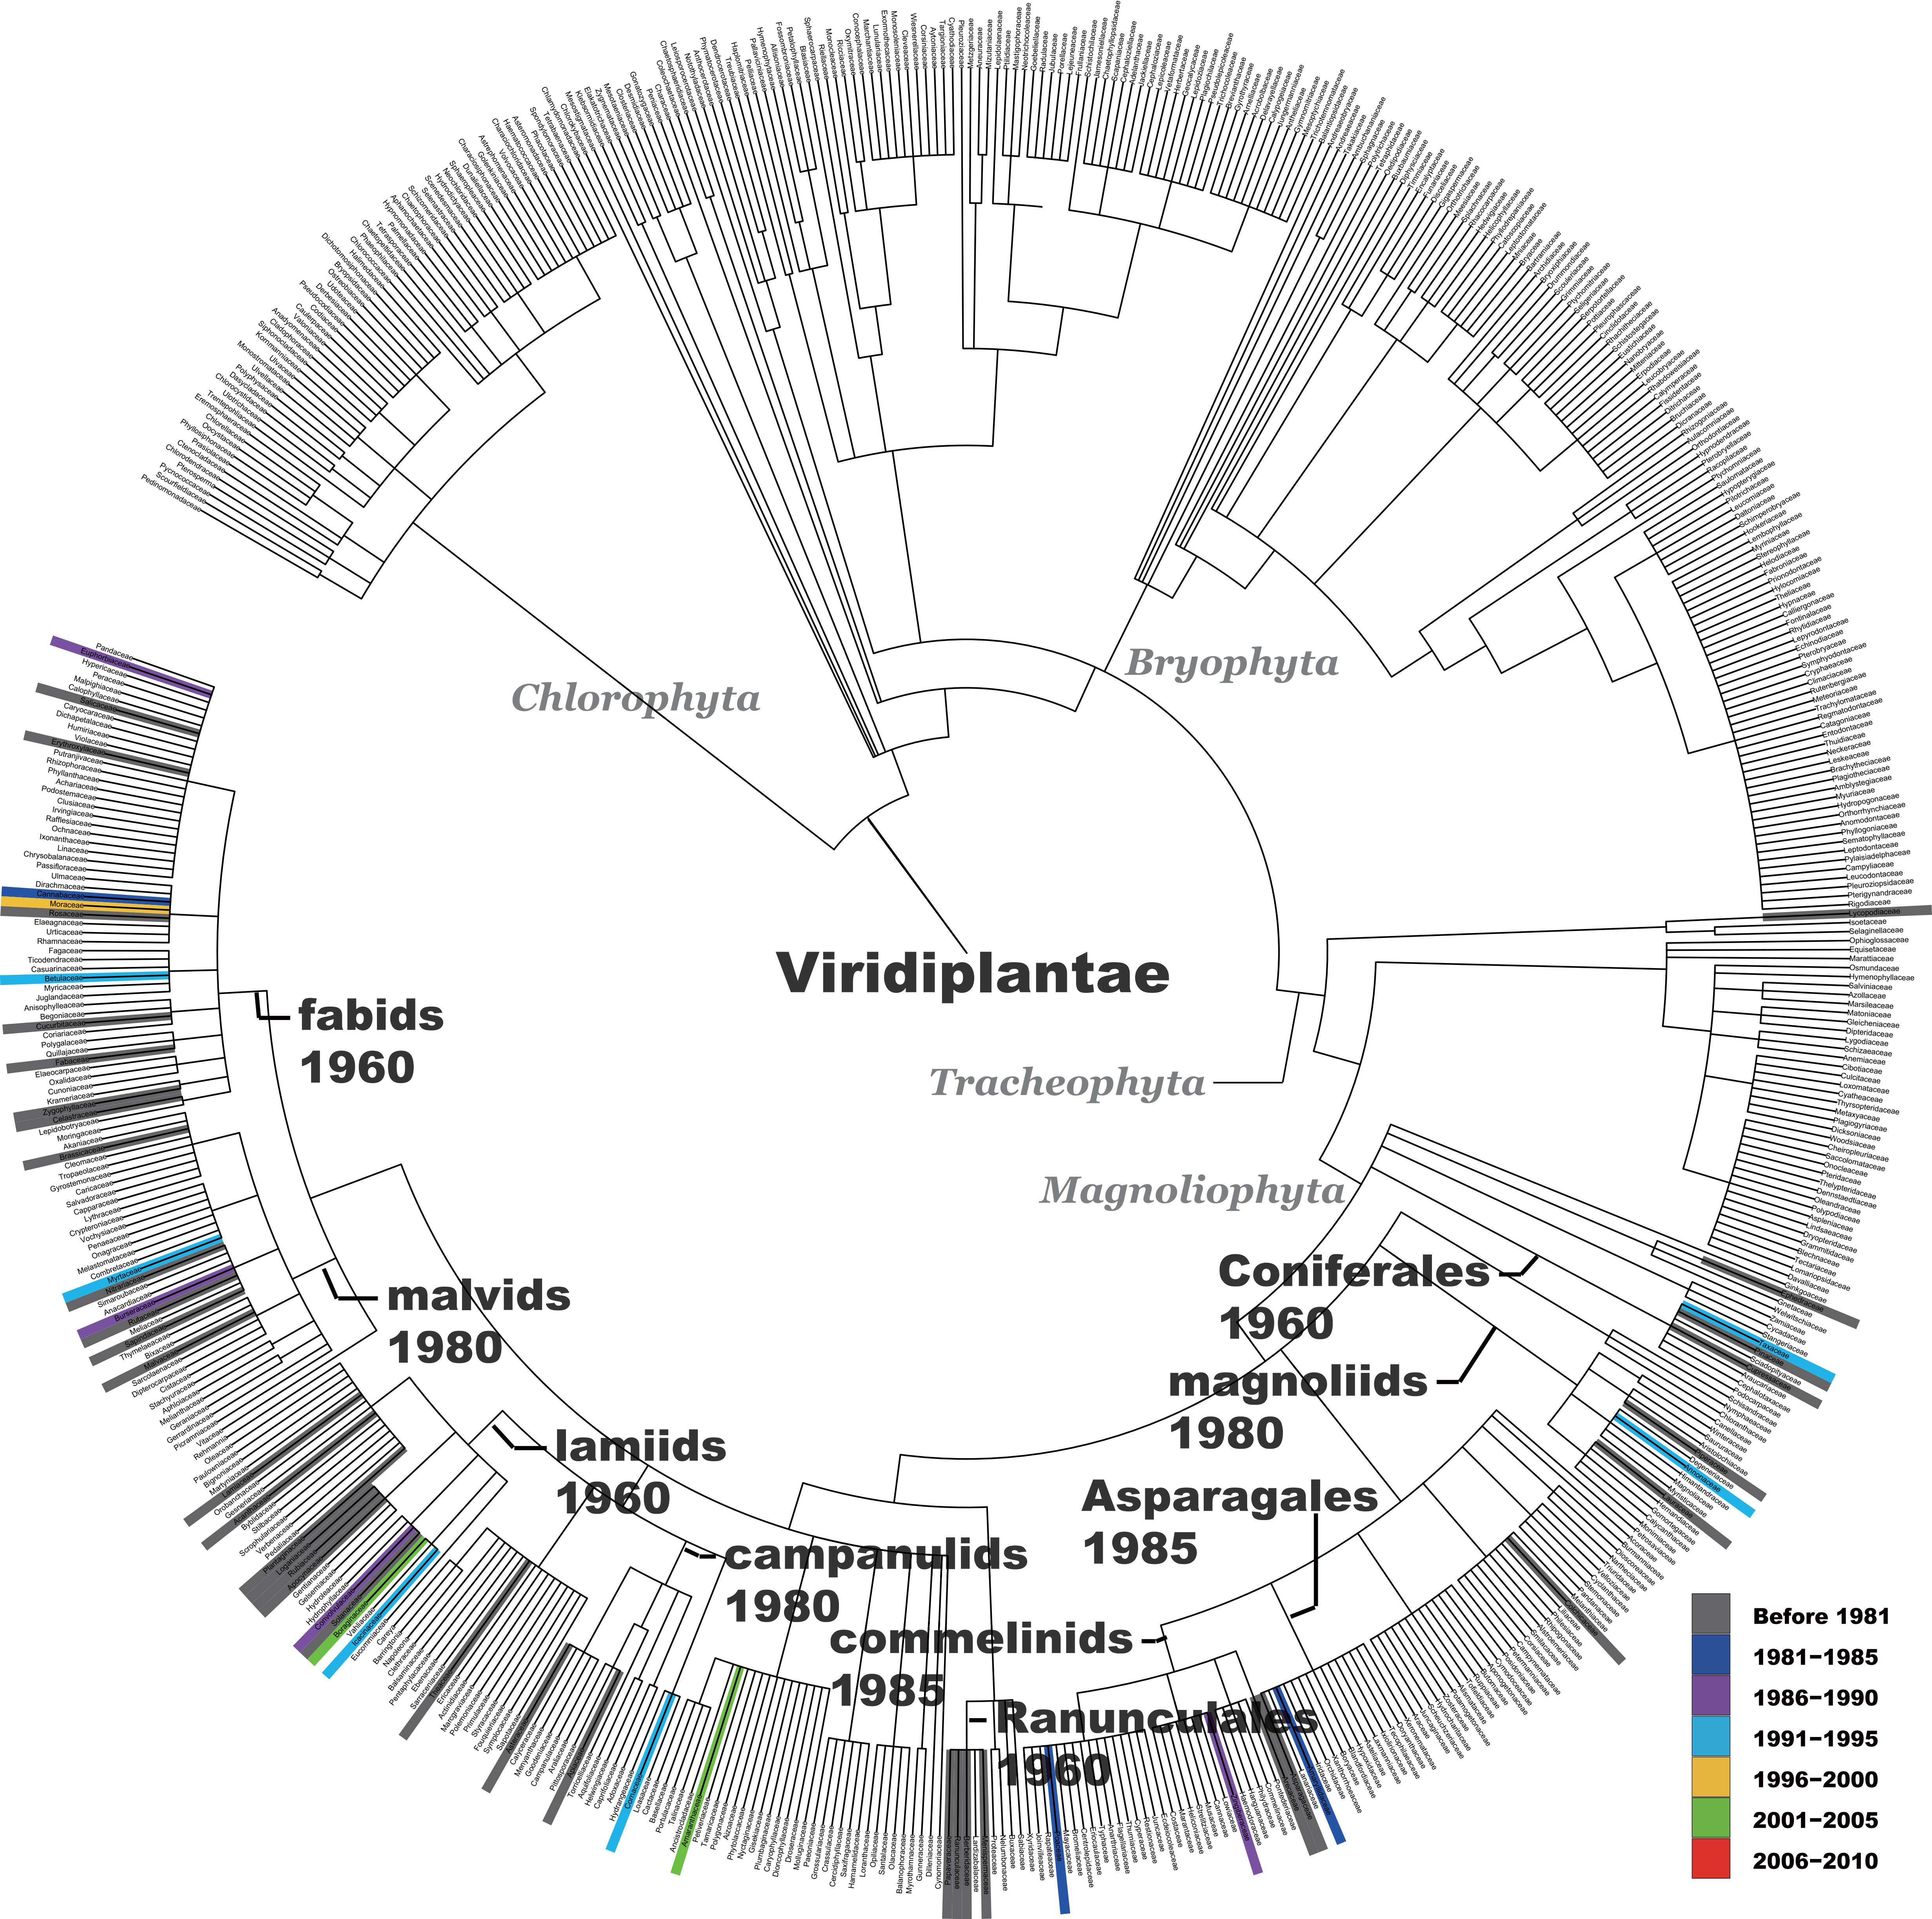

**SI Appendix Figure S15** Time-dependent distribution patterns of historically emerged drug-productive families in the phylogenetic trees of fungi kingdom. The coloring and labeling schemes are the same as in **SI Appendix Figure S12**.





**SI Appendix Figure S16** Time-dependent distribution patterns of historically emerged drug-productive families in the phylogenetic trees of metazoa kingdom. The coloring and labeling schemes are the same as in **SI Appendix Figure S12**.

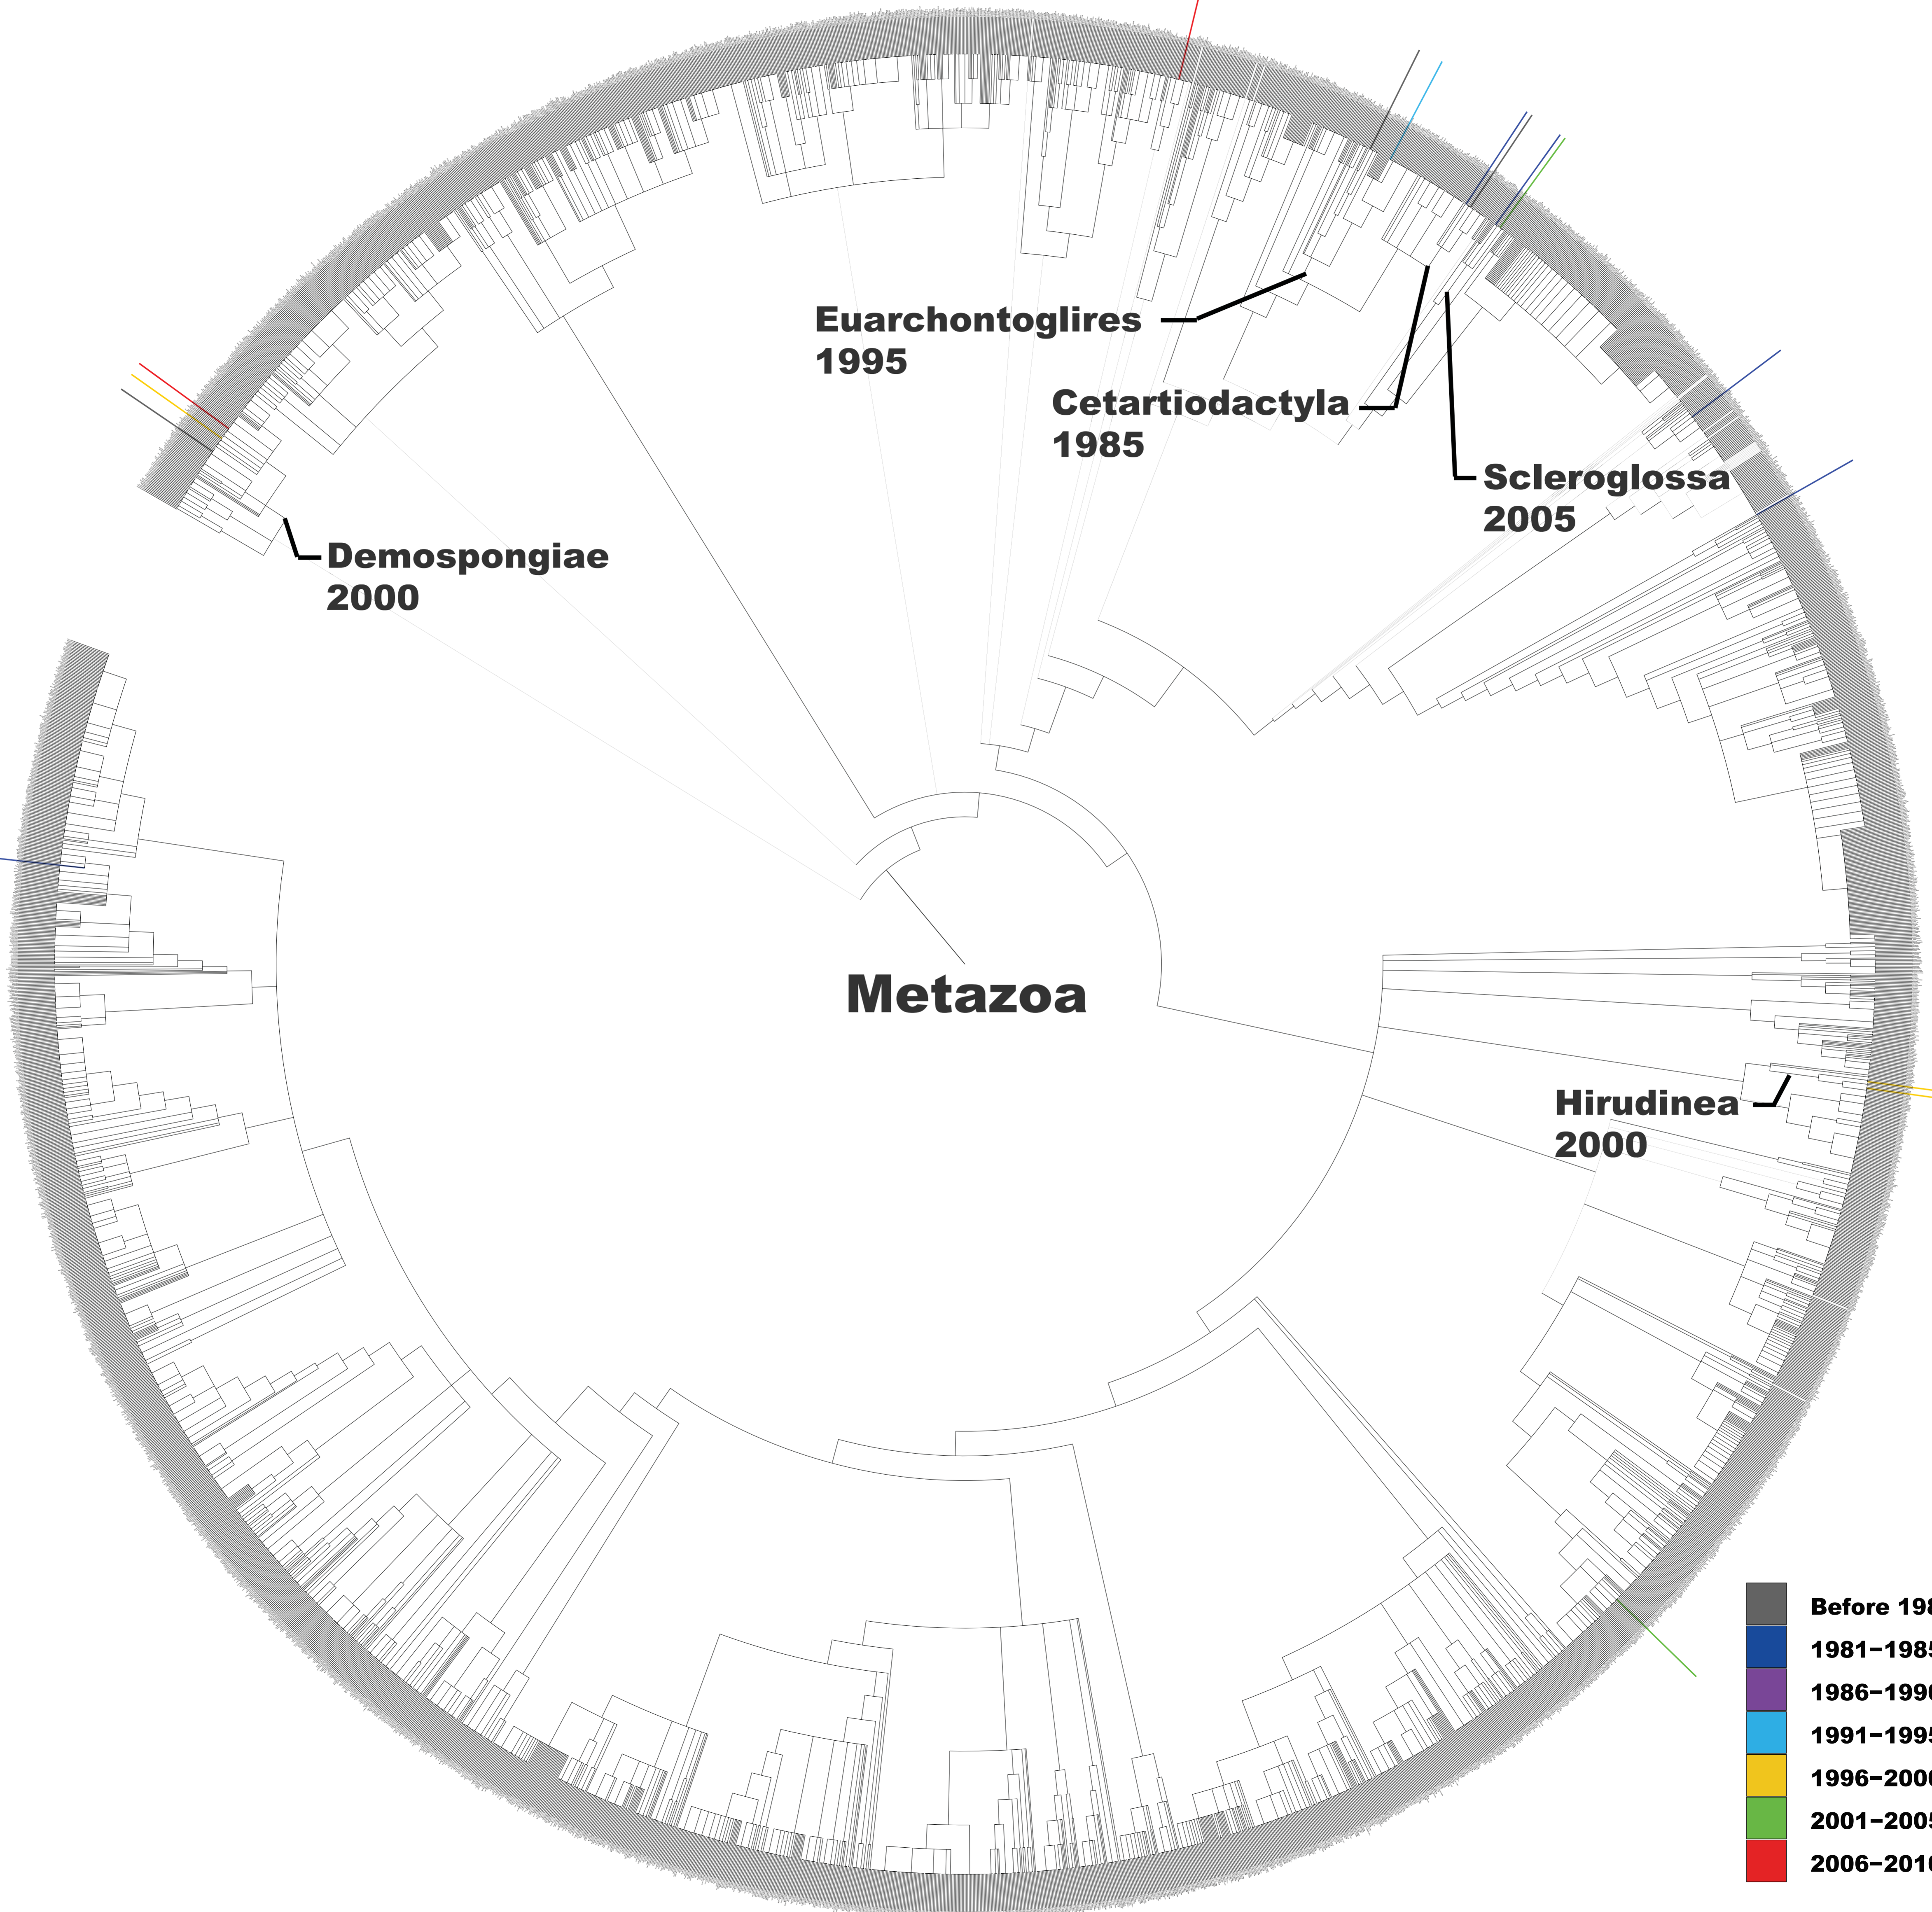

**Euarchontoglires  
1995**

**Cetartiodactyla  
1985**

**Scleroglossa  
2005**

**Demospongiae  
2000**

**Metazoa**

**Hirudinea  
2000**

- Before 1981**
- 1981-1985**
- 1986-1990**
- 1991-1995**
- 1996-2000**
- 2001-2005**
- 2006-2010**

**SI Appendix Figure S17** Full version of the distribution of approved drugs, grouped into drugs against the same target with  $\geq 3$  drugs (drug target class) in the drug-productive families. Drug target classes are labeled as T1-T8 for infectious diseases (T1 HIV-1 protease, T2 RNA polymerase, T3 Bacterial outer membrane, T4 Penicillin binding protein, T5 Ribosome, T6 Beta-lactamase, T7 Fungal outer membrane, T8 SR Ca(2+)-ATPase), T9-T16 for circulation diseases (T9 HMG-CoA reductase, T10 Maltase-glucoamylase, T11 Beta adrenergic receptor, T12 Angiotensin receptor, T13 ACE, T14 Thrombin, T15 Na(+)/K(+) ATPase, T16 Adenosine receptor), T17-T27 for cancers (T17 Androgen receptor, T18 ABL, T19 EGFR, T20 VEGFR, T21 mTOR, T22 Tubulin, T23 DNA topoisomerase, T24 Thymidylate synthase, T25 DNA, T26 DNA polymerase, T27 GNRHR), T28-T34 for nervous systems diseases (T28 Opioid receptor, T29 Alpha adrenergic receptor, T30 Dopamine receptor, T31 Neuronal acetylcholine receptor, T32 GABA receptor, T33 mAChR, T34 PGF receptor), T35-T38 for inflammation (T35 Glucocorticoid receptor, T36 Corticosteroid-binding globulin, T37 5-HT receptor, T38 Beta adrenergic receptor), T39-T40 for immune diseases (T39 Calcineurin, T40 IMPDH), and T41-T43 for reproduction disorders (T41 Progesterone receptor, T42 cGMP-specific 3',5'-cyclic phosphodiesterase, T43 Estrogen receptor). The drug-productive families are labeled as F1-F8 bacterial, F9-F16 Fungi, F17-F43 Viridiplantae and F44-F54 Metazoa. For detailed species-family name, please refer to **SI Appendix Table S14**.

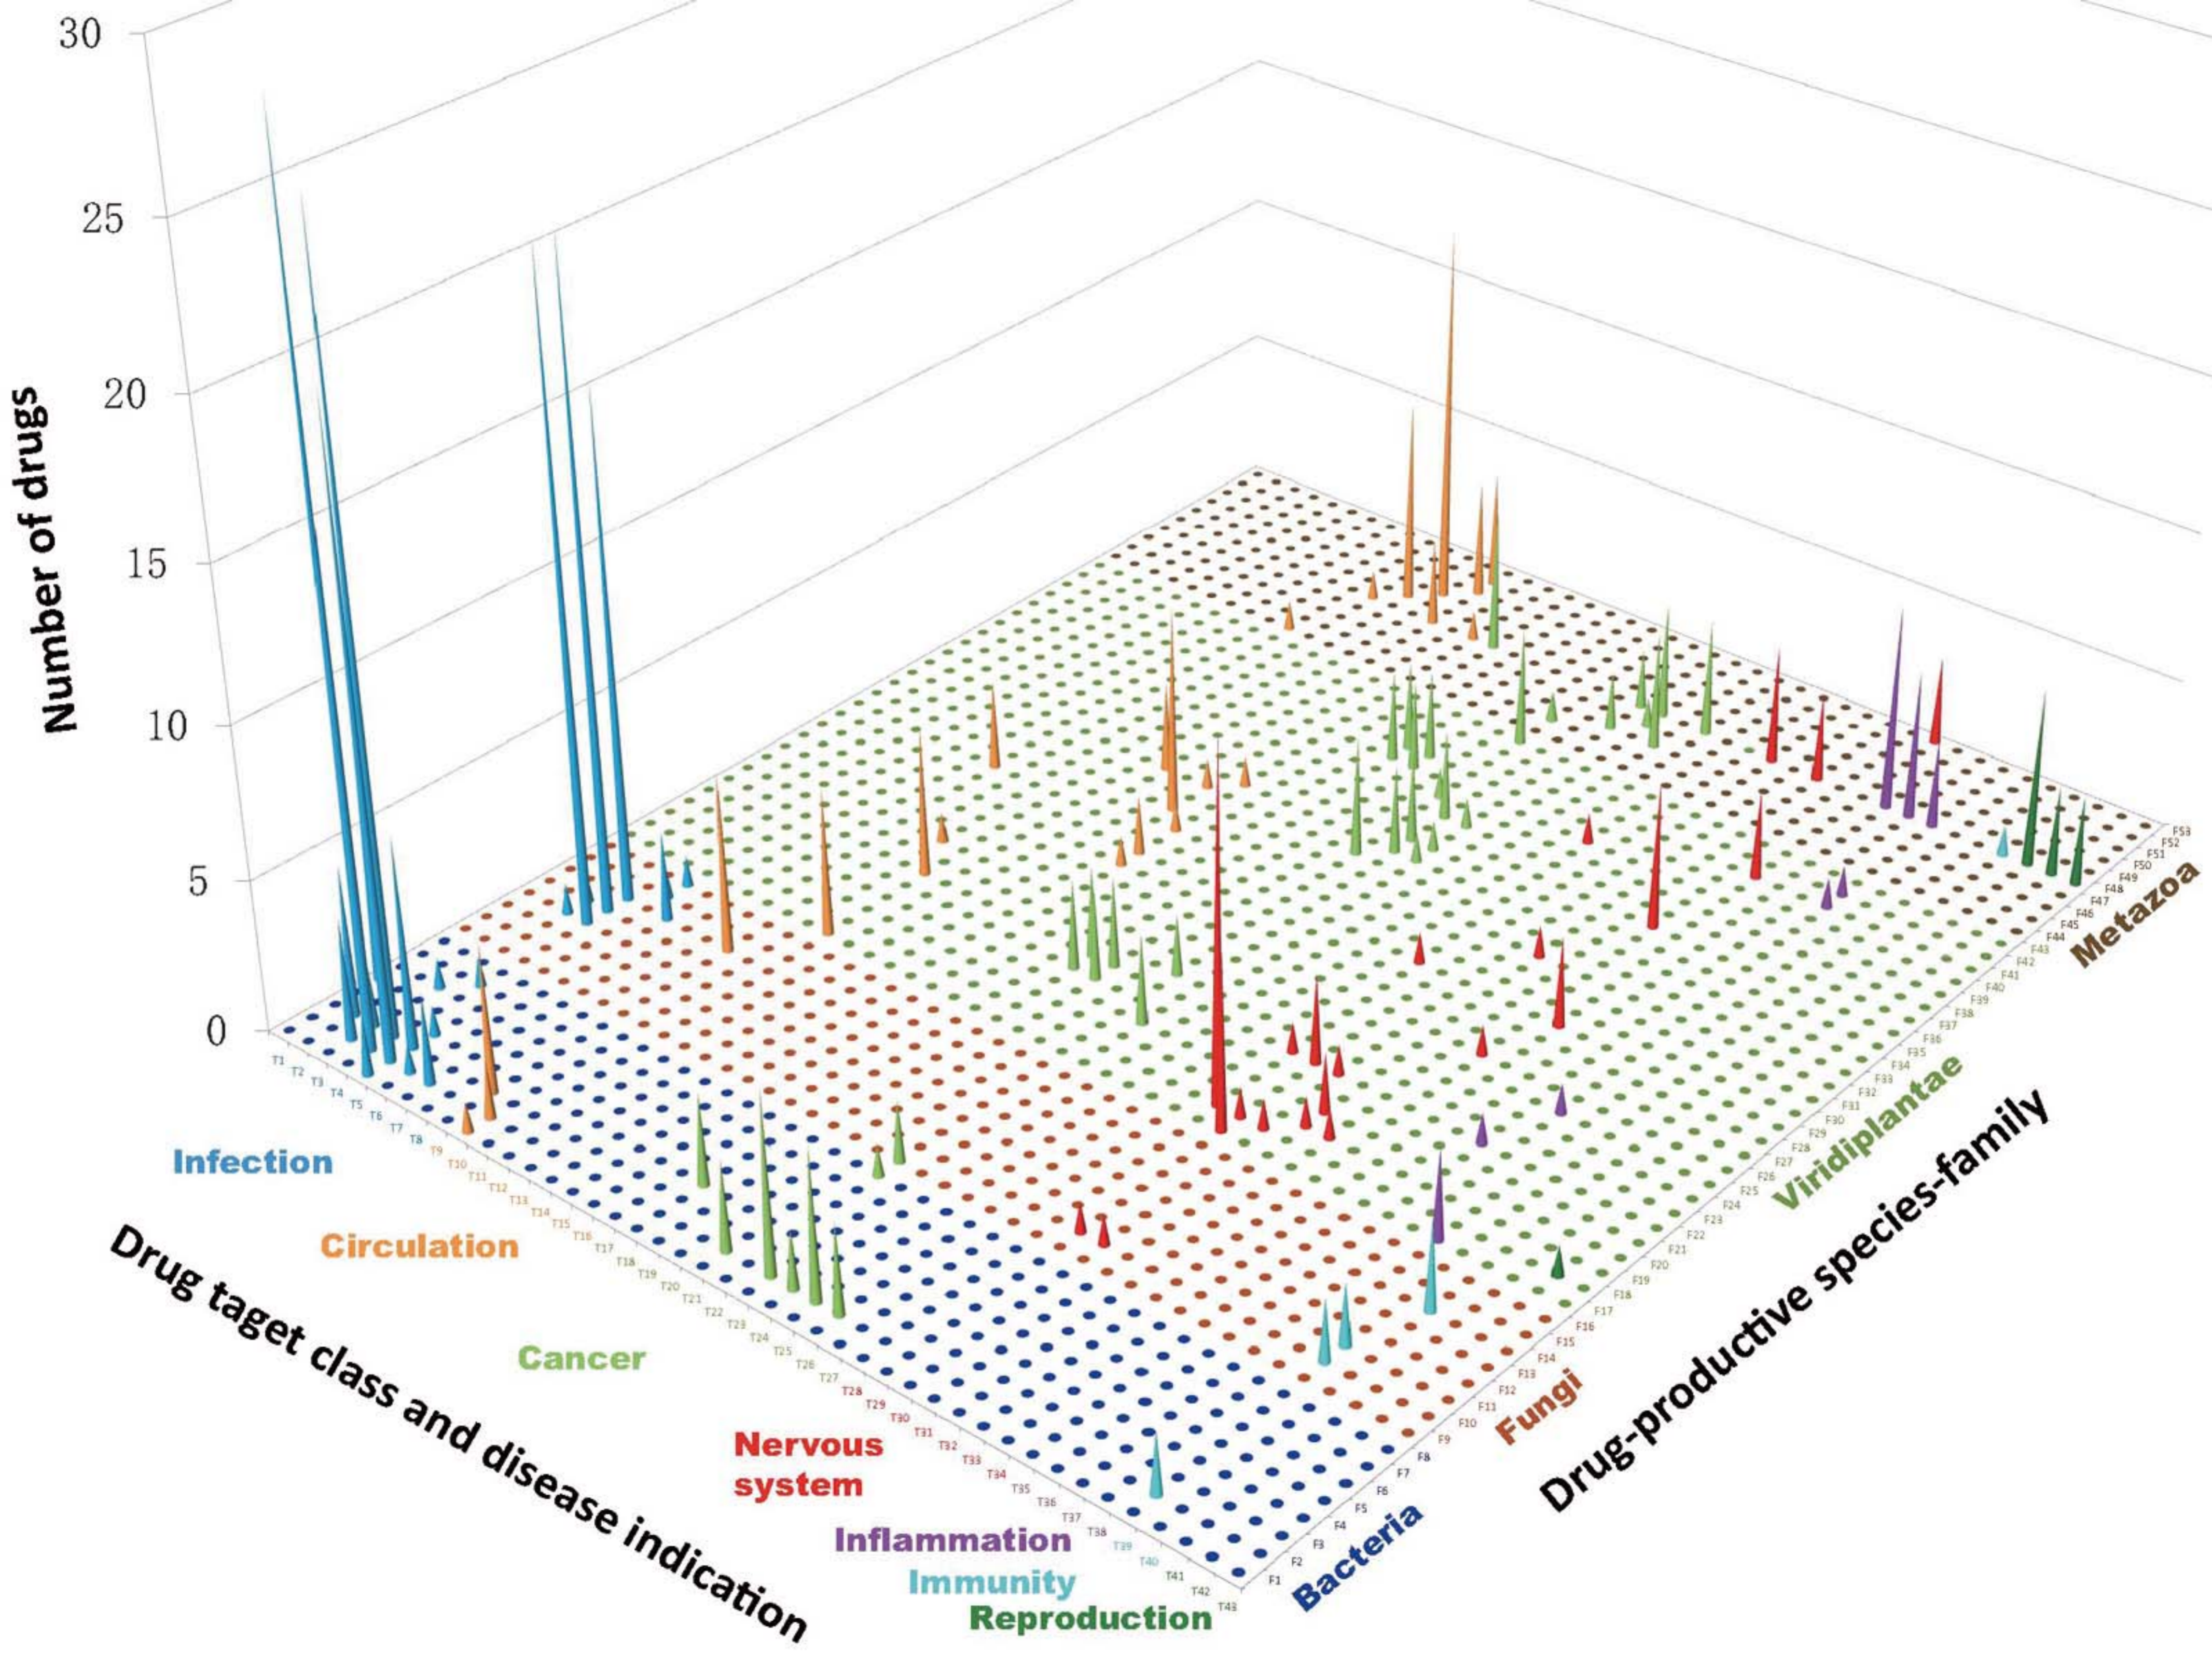

Supplement: 1107336108_sapp.pdf [file 1107336108_sapp.pdf]
